# Supplementary material for: The Gut Commensal Bacteria Veillonella parvula-Induced Neutrophil Activation Mediates Antitumor Activity
Source: Research Square preprint supplement (doi:10.21203/rs.3.rs-7615171/v1), 2025-10-16
Supplement: Supplementary file 1 [file 4bb6b265b2060c71a3a588af.xlsx]

## Sheet: Supp Table 1
Supplementary Table 1. The information on bacterial strains used in this study
	Bacteria species	Bacterial strain	Source	Growth media
1	Akkermansia muciniphila	SNUG61027	isolated	BHI
2	Alistipes indistinctus	SNUG30286	isolated	BHI
3	Bacteroides caccae	SNUG30273	isolated	BHI
4	Bacteroides thetaiotamicron	SNUG30057	isolated	BHI
5	Bifidobacterium adolescentis	SNUG30339	isolated	MRS
6	Bifidobacterium longum	SNUG30192	isolated	MRS
7	Collinsella aerofaciens	SNUG30018	isolated	BHI
8	Enterococcus faecium	SNUG10198	isolated	BHI
9	Enterococcus hirae	SNUG10078	isolated	BHI
10	Eubacterium callanderi	SNUG40125	isolated	BHI
11	Faecalibacterium prausnitzii	SNUG30106	isolated	BHI
12	Lactobacillus crispatus	SNUV206	isolated	MRS
13	Parabacteroides merdae	SNUG30168	isolated	BHI
14	Ruminococcus bromii	ATCC27255	purchased	BHI
15	Ruminococcus faecis	KCTC5757	purchased	BHI
16	Veillonella parvula	KCTC5019	purchased	GAM
