# Supplementary material for: The Gut Commensal Bacteria Veillonella parvula-Induced Neutrophil Activation Mediates Antitumor Activity
Source: Research Square preprint supplement (doi:10.21203/rs.3.rs-7615171/v1), 2025-10-16
Supplement: Supplementary file 2 [file 8e2b4b9bb17917d99a93c66a.xlsx]

## Sheet: Supp Table 3a
Supplementary Table 3a. List of proteins observed in membrane fractions of both VA and VP
No.	Protein IDs	Majority protein IDs	Fasta headers	iBAQ peptides	iBAQ-VA	iBAQ-VP	Peptides	Razor + unique peptides	Unique peptides	Peptides-VA	Peptides-VP	Razor + unique peptides-VA	Razor + unique peptides-VP	Unique peptides-VA	Unique peptides-VP	Sequence coverage [%]	Unique + razor sequence coverage [%]	Unique sequence coverage [%]	Mol. weight [kDa]	Score	MS/MS count-VA	MS/MS count-VP	MS/MS count
1	D1BLI3|D1BLI3	tr|D1BLI3|D1BLI3_VEIPT	tr|D1BLI3|D1BLI3_VEIPT S-layer domain protein OS=Veillonella parvula (strain ATCC 10790 / DSM 2008 / CCUG 5123 / JCM 12972 / NCTC 11810 / Te3) OX=479436 GN=Vpar_0557 PE=4 SV=1	26	3.7127e+09	7.5688e+09	30	18	16	18	28	8	17	8	15	68.3	48.4	46.6	43.982	323.31	848	3441	7429
2	D1BLI2|D1BLI2	tr|D1BLI2|D1BLI2_VEIPT	tr|D1BLI2|D1BLI2_VEIPT S-layer domain protein OS=Veillonella parvula (strain ATCC 10790 / DSM 2008 / CCUG 5123 / JCM 12972 / NCTC 11810 / Te3) OX=479436 GN=Vpar_0556 PE=4 SV=1	26	3.7257e+09	5476300000	30	16	13	16	29	6	16	4	13	71.3	47.4	43.9	44.025	323.31	915	2316	4108
3	D1BQV1|D1BQV1	tr|D1BQV1|D1BQV1_VEIPT	tr|D1BQV1|D1BQV1_VEIPT S-layer domain protein OS=Veillonella parvula (strain ATCC 10790 / DSM 2008 / CCUG 5123 / JCM 12972 / NCTC 11810 / Te3) OX=479436 GN=Vpar_0227 PE=4 SV=1	27	2504200000	2.092e+09	9	5	5	3	3	1	1	1	1	18.9	9.5	9.5	46.437	323.31	301	194	814
4	D1BLI1|D1BLI1	tr|D1BLI1|D1BLI1_VEIPT	tr|D1BLI1|D1BLI1_VEIPT S-layer domain protein OS=Veillonella parvula (strain ATCC 10790 / DSM 2008 / CCUG 5123 / JCM 12972 / NCTC 11810 / Te3) OX=479436 GN=Vpar_0555 PE=4 SV=1	28	2849800000	3.8891e+09	26	16	15	9	25	3	16	2	15	65	47.9	46.4	45.574	323.31	740	1030	2760
5	E1LE72|E1LE72	tr|E1LE72|E1LE72_9FIRM	tr|E1LE72|E1LE72_9FIRM SLH domain-containing protein OS=Veillonella atypica ACS-134-V-Col7a OX=866778 GN=HMPREF9684_1138 PE=4 SV=1	27	3.6253e+09	4395400000	18	6	6	16	10	6	0	6	0	41	21.7	21.7	45.411	51.659	973	998	2829
6	E1LE71|E1LE71	tr|E1LE71|E1LE71_9FIRM	tr|E1LE71|E1LE71_9FIRM SLH domain-containing protein OS=Veillonella atypica ACS-134-V-Col7a OX=866778 GN=HMPREF9684_1137 PE=4 SV=1	28	5487900000	3.7808e+09	32	32	13	29	21	29	21	13	4	70.9	70.9	43.8	44.528	323.31	2015	988	3872
7	E1L927|E1L927	tr|E1L927|E1L927_9FIRM	tr|E1L927|E1L927_9FIRM SLH domain-containing protein OS=Veillonella atypica ACS-134-V-Col7a OX=866778 GN=HMPREF9684_0874 PE=4 SV=1	27	537300000	957420000	7	2	2	6	4	2	0	2	0	12.9	3.9	3.9	48.154	11.167	193	255	683
8	E1LDK2|E1LDK2	tr|E1LDK2|E1LDK2_9FIRM	tr|E1LDK2|E1LDK2_9FIRM SLH domain-containing protein OS=Veillonella atypica ACS-134-V-Col7a OX=866778 GN=HMPREF9684_1256 PE=4 SV=1	23	3.0206e+09	2344900000	13	8	7	12	6	8	1	7	1	27.8	20.4	17	49.21	283.63	640	487	1739
9	D1BL23|D1BL23	tr|D1BL23|D1BL23_VEIPT	tr|D1BL23|D1BL23_VEIPT Conserved carboxylase region OS=Veillonella parvula (strain ATCC 10790 / DSM 2008 / CCUG 5123 / JCM 12972 / NCTC 11810 / Te3) OX=479436 GN=Vpar_0396 PE=4 SV=1	26	406370000	2689500000	32	32	11	18	31	18	31	2	11	77.8	77.8	24.7	50.611	323.31	443	2552	3450
10	E1L929|E1L929	tr|E1L929|E1L929_9FIRM	tr|E1L929|E1L929_9FIRM SLH domain-containing protein OS=Veillonella atypica ACS-134-V-Col7a OX=866778 GN=HMPREF9684_0876 PE=4 SV=1	27	1358200000	1.0678e+09	15	2	1	13	13	2	1	1	0	27.1	3.7	1.5	44.393	-2	384	477	1103
11	E1LCR7|E1LCR7;D1BLR0|D1BLR0	tr|E1LCR7|E1LCR7_9FIRM;tr|D1BLR0|D1BLR0_VEIPT	tr|E1LCR7|E1LCR7_9FIRM Uncharacterized protein OS=Veillonella atypica ACS-134-V-Col7a OX=866778 GN=HMPREF9684_1681 PE=4 SV=1;tr|D1BLR0|D1BLR0_VEIPT Uncharacterized protein OS=Veillonella parvula (strain ATCC 10790 / DSM 2008 / CCUG 5123 / JCM 12972 / NCTC	6	6.7291e+09	6.9674e+09	9	9	9	8	9	8	9	8	9	90.7	90.7	90.7	9.2403	323.31	1081	852	2889
12	D1BNG4|D1BNG4	tr|D1BNG4|D1BNG4_VEIPT	tr|D1BNG4|D1BNG4_VEIPT Biotin/lipoyl attachment domain-containing protein OS=Veillonella parvula (strain ATCC 10790 / DSM 2008 / CCUG 5123 / JCM 12972 / NCTC 11810 / Te3) OX=479436 GN=Vpar_1241 PE=4 SV=1	9	300860000	4.0827e+09	11	5	5	7	11	1	5	1	5	97.6	56.7	56.7	12.518	107.15	128	240	392
13	E1LB73|E1LB73	tr|E1LB73|E1LB73_9FIRM	tr|E1LB73|E1LB73_9FIRM Conserved carboxylase domain protein OS=Veillonella atypica ACS-134-V-Col7a OX=866778 GN=HMPREF9684_1445 PE=4 SV=1	26	444290000	1.7785e+09	26	5	5	20	20	4	0	4	0	68.2	15.1	15.1	50.724	50.017	475	1814	2647
14	E1L928|E1L928	tr|E1L928|E1L928_9FIRM	tr|E1L928|E1L928_9FIRM SLH domain-containing protein OS=Veillonella atypica ACS-134-V-Col7a OX=866778 GN=HMPREF9684_0875 PE=4 SV=1	23	648650000	1.0601e+09	13	9	9	12	6	8	2	8	2	32.8	24	24	49.903	116.85	434	253	918
15	D1BR37|D1BR37	tr|D1BR37|D1BR37_VEIPT	tr|D1BR37|D1BR37_VEIPT Rubrerythrin OS=Veillonella parvula (strain ATCC 10790 / DSM 2008 / CCUG 5123 / JCM 12972 / NCTC 11810 / Te3) OX=479436 GN=Vpar_0316 PE=4 SV=1	11	11000000	3.5524e+09	11	11	5	6	11	6	11	1	5	65.2	65.2	23.8	20.078	323.31	10	1905	1932
16	E1L9U6|E1L9U6	tr|E1L9U6|E1L9U6_9FIRM	tr|E1L9U6|E1L9U6_9FIRM Rubrerythrin OS=Veillonella atypica ACS-134-V-Col7a OX=866778 GN=rbr PE=4 SV=1	11	36653000	2265700000	9	3	3	8	7	3	1	3	1	59.7	18.2	18.2	20.093	12.347	26	976	1009
17	D1BPS4|D1BPS4	tr|D1BPS4|D1BPS4_VEIPT	tr|D1BPS4|D1BPS4_VEIPT Succinate dehydrogenase or fumarate reductase, flavoprotein subunit OS=Veillonella parvula (strain ATCC 10790 / DSM 2008 / CCUG 5123 / JCM 12972 / NCTC 11810 / Te3) OX=479436 GN=Vpar_1705 PE=3 SV=1	36	1.7318e+09	2.021e+09	34	34	8	28	34	28	34	3	8	74	74	18	62.58	323.31	1921	2124	4504
18	E1LCY9|E1LCY9	tr|E1LCY9|E1LCY9_9FIRM	tr|E1LCY9|E1LCY9_9FIRM Succinate dehydrogenase or fumarate reductase, flavoprotein subunit OS=Veillonella atypica ACS-134-V-Col7a OX=866778 GN=HMPREF9684_0321 PE=3 SV=1	36	2269200000	1.4718e+09	33	7	7	32	27	7	1	7	1	70.1	14.2	14.2	62.531	101.89	2318	1953	4705
19	D1BP59|D1BP59	tr|D1BP59|D1BP59_VEIPT	tr|D1BP59|D1BP59_VEIPT 30S ribosomal protein S19 OS=Veillonella parvula (strain ATCC 10790 / DSM 2008 / CCUG 5123 / JCM 12972 / NCTC 11810 / Te3) OX=479436 GN=rpsS PE=3 SV=1	5	30733000	1.6089e+09	6	6	1	1	6	1	6	0	1	66.7	66.7	10.8	10.394	77.087	0	243	251
20	E1LE15|E1LE15	tr|E1LE15|E1LE15_9FIRM	tr|E1LE15|E1LE15_9FIRM 30S ribosomal protein S19 OS=Veillonella atypica ACS-134-V-Col7a OX=866778 GN=rpsS PE=3 SV=1	5	36507000	1212800000	6	1	1	2	5	1	0	1	0	66.7	10.8	10.8	10.336	3.0317	1	239	247
21	D1BP46|D1BP46;E1LE02|E1LE02	tr|D1BP46|D1BP46_VEIPT;tr|E1LE02|E1LE02_9FIRM	tr|D1BP46|D1BP46_VEIPT 30S ribosomal protein S5 OS=Veillonella parvula (strain ATCC 10790 / DSM 2008 / CCUG 5123 / JCM 12972 / NCTC 11810 / Te3) OX=479436 GN=rpsE PE=3 SV=1;tr|E1LE02|E1LE02_9FIRM 30S ribosomal protein S5 OS=Veillonella atypica ACS-134-V-Co	13	1.0162e+09	1220200000	15	15	15	12	15	12	15	12	15	68.9	68.9	68.9	17.584	208.17	207	253	629
22	D1BN59|D1BN59;E1L969|E1L969	tr|D1BN59|D1BN59_VEIPT;tr|E1L969|E1L969_9FIRM	tr|D1BN59|D1BN59_VEIPT Anaerobic cobalt chelatase OS=Veillonella parvula (strain ATCC 10790 / DSM 2008 / CCUG 5123 / JCM 12972 / NCTC 11810 / Te3) OX=479436 GN=Vpar_1135 PE=4 SV=1;tr|E1L969|E1L969_9FIRM Sirohydrochlorin cobaltochelatase OS=Veillonella atyp	18	49131000	813230000	16	16	16	12	16	12	16	12	16	57.8	57.8	57.8	36.393	323.31	28	393	446
23	E1LAK1|E1LAK1;D1BP97|D1BP97	tr|E1LAK1|E1LAK1_9FIRM;tr|D1BP97|D1BP97_VEIPT	tr|E1LAK1|E1LAK1_9FIRM Hydrolyase, tartrate beta subunit/fumarate domain protein, Fe-S type OS=Veillonella atypica ACS-134-V-Col7a OX=866778 GN=HMPREF9684_1061 PE=3 SV=1;tr|D1BP97|D1BP97_VEIPT Hydro-lyase, Fe-S type, tartrate/fumarate subfamily, beta subun	10	1309000000	4675400000	13	13	13	9	13	9	13	9	13	49.5	49.5	49.5	20.209	323.31	294	658	1310
24	E1LE24|E1LE24;D1BP68|D1BP68	tr|E1LE24|E1LE24_9FIRM;tr|D1BP68|D1BP68_VEIPT	tr|E1LE24|E1LE24_9FIRM 30S ribosomal protein S12 OS=Veillonella atypica ACS-134-V-Col7a OX=866778 GN=rpsL PE=3 SV=1;tr|D1BP68|D1BP68_VEIPT 30S ribosomal protein S12 OS=Veillonella parvula (strain ATCC 10790 / DSM 2008 / CCUG 5123 / JCM 12972 / NCTC 11810 /	7	5371900000	2.9907e+09	7	7	7	7	5	7	5	7	5	38.7	38.7	38.7	13.671	295.64	129	104	322
25	D1BP77|D1BP77;E1LAM1|E1LAM1	tr|D1BP77|D1BP77_VEIPT;tr|E1LAM1|E1LAM1_9FIRM	tr|D1BP77|D1BP77_VEIPT 50S ribosomal protein L1 OS=Veillonella parvula (strain ATCC 10790 / DSM 2008 / CCUG 5123 / JCM 12972 / NCTC 11810 / Te3) OX=479436 GN=rplA PE=3 SV=1;tr|E1LAM1|E1LAM1_9FIRM 50S ribosomal protein L1 OS=Veillonella atypica ACS-134-V-Co	18	977730000	1.6384e+09	16	16	16	15	15	15	15	15	15	66.1	66.1	66.1	25.227	117.51	303	459	1140
26	E1LBX0|E1LBX0	tr|E1LBX0|E1LBX0_9FIRM	tr|E1LBX0|E1LBX0_9FIRM Glutaconyl-CoA decarboxylase subunit gamma OS=Veillonella atypica ACS-134-V-Col7a OX=866778 GN=gcdC PE=4 SV=1	9	1165500000	486300000	11	11	5	11	7	11	7	5	1	97.6	97.6	59.1	12.486	170.82	200	166	373
27	D1BMY1|D1BMY1	tr|D1BMY1|D1BMY1_VEIPT	tr|D1BMY1|D1BMY1_VEIPT 50S ribosomal protein L28 OS=Veillonella parvula (strain ATCC 10790 / DSM 2008 / CCUG 5123 / JCM 12972 / NCTC 11810 / Te3) OX=479436 GN=rpmB PE=3 SV=1	4	676800000	2504500000	5	5	5	4	5	4	5	4	5	72.6	72.6	72.6	6.9	203.04	168	448	713
28	D1BPA3|D1BPA3	tr|D1BPA3|D1BPA3_VEIPT	tr|D1BPA3|D1BPA3_VEIPT ATP synthase subunit alpha OS=Veillonella parvula (strain ATCC 10790 / DSM 2008 / CCUG 5123 / JCM 12972 / NCTC 11810 / Te3) OX=479436 GN=atpA PE=3 SV=1	27	38286000	517720000	21	21	9	8	21	8	21	2	9	45.1	45.1	21.7	55.355	193.91	16	209	288
29	E1LDZ3|E1LDZ3;D1BP37|D1BP37	tr|E1LDZ3|E1LDZ3_9FIRM;tr|D1BP37|D1BP37_VEIPT	tr|E1LDZ3|E1LDZ3_9FIRM 30S ribosomal protein S11 OS=Veillonella atypica ACS-134-V-Col7a OX=866778 GN=rpsK PE=3 SV=1;tr|D1BP37|D1BP37_VEIPT 30S ribosomal protein S11 OS=Veillonella parvula (strain ATCC 10790 / DSM 2008 / CCUG 5123 / JCM 12972 / NCTC 11810 /	8	1118700000	2566800000	6	6	6	5	5	5	5	5	5	41.9	41.9	41.9	13.787	89.253	592	858	2068
30	E1LAK0|E1LAK0	tr|E1LAK0|E1LAK0_9FIRM	tr|E1LAK0|E1LAK0_9FIRM Hydrolyase, tartrate alpha subunit/fumarate domain protein, Fe-S type OS=Veillonella atypica ACS-134-V-Col7a OX=866778 GN=HMPREF9684_1060 PE=3 SV=1	18	446620000	1390000000	20	1	1	13	19	1	0	1	0	71.8	6.1	6.1	30.087	37.874	145	707	1318
31	D1BP98|D1BP98	tr|D1BP98|D1BP98_VEIPT	tr|D1BP98|D1BP98_VEIPT Hydro-lyase, Fe-S type, tartrate/fumarate subfamily, alpha subunit OS=Veillonella parvula (strain ATCC 10790 / DSM 2008 / CCUG 5123 / JCM 12972 / NCTC 11810 / Te3) OX=479436 GN=Vpar_1529 PE=3 SV=1	19	377960000	1.6482e+09	22	22	3	14	22	14	22	2	3	72.5	72.5	6.8	30.13	323.31	142	830	1518
32	E1L9T6|E1L9T6	tr|E1L9T6|E1L9T6_9FIRM	tr|E1L9T6|E1L9T6_9FIRM Universal stress family protein OS=Veillonella atypica ACS-134-V-Col7a OX=866778 GN=HMPREF9684_0832 PE=3 SV=1	8	79842000	1278900000	8	1	1	6	7	1	0	1	0	46.6	4.7	4.7	15.612	-2	63	401	577
33	D1BR27|D1BR27	tr|D1BR27|D1BR27_VEIPT	tr|D1BR27|D1BR27_VEIPT UspA domain protein OS=Veillonella parvula (strain ATCC 10790 / DSM 2008 / CCUG 5123 / JCM 12972 / NCTC 11810 / Te3) OX=479436 GN=Vpar_0306 PE=3 SV=1	8	79842000	1278900000	8	8	1	5	8	5	8	0	1	46.6	46.6	4.7	15.624	151.17	63	401	577
34	D1BNG7|D1BNG7	tr|D1BNG7|D1BNG7_VEIPT	tr|D1BNG7|D1BNG7_VEIPT Carboxyl transferase OS=Veillonella parvula (strain ATCC 10790 / DSM 2008 / CCUG 5123 / JCM 12972 / NCTC 11810 / Te3) OX=479436 GN=Vpar_1244 PE=4 SV=1	22	453520000	1.8206e+09	21	4	4	15	21	1	4	1	4	49.7	9.4	9.4	55.086	108.37	529	1168	1817
35	E1LBW7|E1LBW7	tr|E1LBW7|E1LBW7_9FIRM	tr|E1LBW7|E1LBW7_9FIRM Methylmalonyl-CoA decarboxylase alpha subunit OS=Veillonella atypica ACS-134-V-Col7a OX=866778 GN=mmdA PE=4 SV=1	22	485070000	1.5749e+09	22	22	5	18	18	18	18	4	1	49.7	49.7	11	55.129	323.31	575	1068	1778
36	E1LCY8|E1LCY8	tr|E1LCY8|E1LCY8_9FIRM	tr|E1LCY8|E1LCY8_9FIRM Succinate dehydrogenase and fumarate reductase iron-sulfur protein OS=Veillonella atypica ACS-134-V-Col7a OX=866778 GN=HMPREF9684_0320 PE=3 SV=1	27	647660000	1101700000	25	3	3	21	23	3	1	3	1	70.9	9.4	9.4	36.322	41.598	441	664	1394
37	D1BPS3|D1BPS3	tr|D1BPS3|D1BPS3_VEIPT	tr|D1BPS3|D1BPS3_VEIPT Succinate dehydrogenase and fumarate reductase iron-sulfur protein OS=Veillonella parvula (strain ATCC 10790 / DSM 2008 / CCUG 5123 / JCM 12972 / NCTC 11810 / Te3) OX=479436 GN=Vpar_1704 PE=3 SV=1	27	639170000	1134400000	28	28	6	19	28	19	28	1	6	75	75	13.4	36.261	323.31	419	862	1663
38	D1BR71|D1BR71	tr|D1BR71|D1BR71_VEIPT	tr|D1BR71|D1BR71_VEIPT Flotillin-like protein FloA OS=Veillonella parvula (strain ATCC 10790 / DSM 2008 / CCUG 5123 / JCM 12972 / NCTC 11810 / Te3) OX=479436 GN=floA PE=3 SV=1	18	1391400000	1.6965e+09	19	19	1	18	18	18	18	1	1	70.4	70.4	6.9	34.035	323.31	718	750	2734
39	E1LBC9|E1LBC9	tr|E1LBC9|E1LBC9_9FIRM	tr|E1LBC9|E1LBC9_9FIRM Flotillin-like protein FloA OS=Veillonella atypica ACS-134-V-Col7a OX=866778 GN=floA PE=3 SV=1	18	1397200000	1.6901e+09	19	1	1	18	18	1	1	1	1	70.4	6.9	6.9	34.049	108.42	768	653	2527
40	D1BN30|D1BN30	tr|D1BN30|D1BN30_VEIPT	tr|D1BN30|D1BN30_VEIPT Uncharacterized protein OS=Veillonella parvula (strain ATCC 10790 / DSM 2008 / CCUG 5123 / JCM 12972 / NCTC 11810 / Te3) OX=479436 GN=Vpar_1106 PE=4 SV=1	14	150430000	1.5179e+09	14	14	12	6	13	6	13	4	11	82.5	82.5	75.1	20.177	323.31	207	508	1472
41	E1LBZ7|E1LBZ7;D1BND8|D1BND8	tr|E1LBZ7|E1LBZ7_9FIRM;tr|D1BND8|D1BND8_VEIPT	tr|E1LBZ7|E1LBZ7_9FIRM 50S ribosomal protein L27 OS=Veillonella atypica ACS-134-V-Col7a OX=866778 GN=rpmA PE=3 SV=1;tr|D1BND8|D1BND8_VEIPT 50S ribosomal protein L27 OS=Veillonella parvula (strain ATCC 10790 / DSM 2008 / CCUG 5123 / JCM 12972 / NCTC 11810 /	7	26585000	1400900000	5	5	5	2	5	2	5	2	5	51.1	51.1	51.1	10.36	67.848	3	178	212
42	D1BQI1|D1BQI1;E1LDJ9|E1LDJ9	tr|D1BQI1|D1BQI1_VEIPT;tr|E1LDJ9|E1LDJ9_9FIRM	tr|D1BQI1|D1BQI1_VEIPT Periplasmic binding protein/LacI transcriptional regulator OS=Veillonella parvula (strain ATCC 10790 / DSM 2008 / CCUG 5123 / JCM 12972 / NCTC 11810 / Te3) OX=479436 GN=Vpar_0105 PE=4 SV=1;tr|E1LDJ9|E1LDJ9_9FIRM Sugar-binding domain	17	2453200000	1.8354e+09	18	18	18	17	16	17	16	17	16	69.4	69.4	69.4	30.963	323.31	662	527	1645
43	D1BM26|D1BM26	tr|D1BM26|D1BM26_VEIPT	tr|D1BM26|D1BM26_VEIPT Pyruvate carboxylase OS=Veillonella parvula (strain ATCC 10790 / DSM 2008 / CCUG 5123 / JCM 12972 / NCTC 11810 / Te3) OX=479436 GN=Vpar_0752 PE=4 SV=1	68	44240000	27962000	44	44	23	23	33	23	33	4	18	43.9	43.9	25.7	128.59	323.31	162	94	460
44	D1BLR1|D1BLR1	tr|D1BLR1|D1BLR1_VEIPT	tr|D1BLR1|D1BLR1_VEIPT Heavy metal translocating P-type ATPase OS=Veillonella parvula (strain ATCC 10790 / DSM 2008 / CCUG 5123 / JCM 12972 / NCTC 11810 / Te3) OX=479436 GN=Vpar_0635 PE=3 SV=1	36	778820000	926090000	32	14	14	22	30	6	13	6	13	45.6	19.4	19.4	77.851	199.71	781	1032	2490
45	D1BNW1|D1BNW1	tr|D1BNW1|D1BNW1_VEIPT	tr|D1BNW1|D1BNW1_VEIPT Pyruvate ferredoxin/flavodoxin oxidoreductase OS=Veillonella parvula (strain ATCC 10790 / DSM 2008 / CCUG 5123 / JCM 12972 / NCTC 11810 / Te3) OX=479436 GN=Vpar_1390 PE=3 SV=1	55	423950000	945350000	53	53	22	31	51	31	51	3	21	55.2	55.2	24.9	128.27	323.31	1040	1935	4097
46	D1BQC7|D1BQC7	tr|D1BQC7|D1BQC7_VEIPT	tr|D1BQC7|D1BQC7_VEIPT Hemagluttinin domain protein OS=Veillonella parvula (strain ATCC 10790 / DSM 2008 / CCUG 5123 / JCM 12972 / NCTC 11810 / Te3) OX=479436 GN=Vpar_0051 PE=3 SV=1	118	4447000	279910000	74	27	24	10	69	2	25	0	22	45.7	21.1	19.1	205.83	323.31	4	544	712
47	D1BPS2|D1BPS2	tr|D1BPS2|D1BPS2_VEIPT	tr|D1BPS2|D1BPS2_VEIPT Succinate dehydrogenase subunit C OS=Veillonella parvula (strain ATCC 10790 / DSM 2008 / CCUG 5123 / JCM 12972 / NCTC 11810 / Te3) OX=479436 GN=Vpar_1703 PE=4 SV=1	15	668000000	850580000	14	3	3	11	14	0	3	0	3	47.1	7.2	7.2	31.761	91.652	186	290	500
48	D1BQC8|D1BQC8	tr|D1BQC8|D1BQC8_VEIPT	tr|D1BQC8|D1BQC8_VEIPT YadA domain protein OS=Veillonella parvula (strain ATCC 10790 / DSM 2008 / CCUG 5123 / JCM 12972 / NCTC 11810 / Te3) OX=479436 GN=Vpar_0052 PE=3 SV=1	219	9335300	58020000	62	46	44	9	56	3	40	3	38	22.5	17.4	16.6	368.69	323.31	10	204	267
49	E1LCY7|E1LCY7	tr|E1LCY7|E1LCY7_9FIRM	tr|E1LCY7|E1LCY7_9FIRM Cysteine-rich domain protein OS=Veillonella atypica ACS-134-V-Col7a OX=866778 GN=HMPREF9684_0319 PE=4 SV=1	15	722030000	753590000	15	15	4	14	12	14	12	3	1	48.8	48.8	8.9	31.999	323.31	302	279	603
50	D1BLF3|D1BLF3	tr|D1BLF3|D1BLF3_VEIPT	tr|D1BLF3|D1BLF3_VEIPT Surface antigen (D15) OS=Veillonella parvula (strain ATCC 10790 / DSM 2008 / CCUG 5123 / JCM 12972 / NCTC 11810 / Te3) OX=479436 GN=Vpar_0527 PE=4 SV=1	38	339620000	1132100000	39	39	23	17	36	17	36	3	21	67.2	67.2	47.8	79.23	323.31	771	1750	4829
51	D1BP23|D1BP23	tr|D1BP23|D1BP23_VEIPT	tr|D1BP23|D1BP23_VEIPT 30S ribosomal protein S4 OS=Veillonella parvula (strain ATCC 10790 / DSM 2008 / CCUG 5123 / JCM 12972 / NCTC 11810 / Te3) OX=479436 GN=rpsD PE=3 SV=1	14	1.9099e+09	1.6637e+09	19	19	4	15	19	15	19	0	4	72.3	72.3	9.2	23.083	251.76	797	767	2339
52	D1BP54|D1BP54	tr|D1BP54|D1BP54_VEIPT	tr|D1BP54|D1BP54_VEIPT 30S ribosomal protein S17 OS=Veillonella parvula (strain ATCC 10790 / DSM 2008 / CCUG 5123 / JCM 12972 / NCTC 11810 / Te3) OX=479436 GN=rpsQ PE=3 SV=1	5	161240000	2554400000	7	7	2	3	7	3	7	0	2	62.8	62.8	33.7	10.018	190.88	9	122	154
53	D1BPA5|D1BPA5	tr|D1BPA5|D1BPA5_VEIPT	tr|D1BPA5|D1BPA5_VEIPT ATP synthase subunit b OS=Veillonella parvula (strain ATCC 10790 / DSM 2008 / CCUG 5123 / JCM 12972 / NCTC 11810 / Te3) OX=479436 GN=atpF PE=3 SV=1	13	8177000	820090000	12	12	12	3	12	3	12	3	12	56.4	56.4	56.4	18.67	113.16	0	62	131
54	E1LCU1|E1LCU1	tr|E1LCU1|E1LCU1_9FIRM	tr|E1LCU1|E1LCU1_9FIRM 30S ribosomal protein S4 OS=Veillonella atypica ACS-134-V-Col7a OX=866778 GN=rpsD PE=3 SV=1	14	2.0202e+09	1.6361e+09	18	3	3	18	15	3	0	3	0	72.3	9.2	9.2	23.099	107.49	912	673	2277
55	E1LE16|E1LE16	tr|E1LE16|E1LE16_9FIRM	tr|E1LE16|E1LE16_9FIRM 50S ribosomal protein L2 OS=Veillonella atypica ACS-134-V-Col7a OX=866778 GN=rplB PE=3 SV=1	18	1.5577e+09	618120000	18	2	2	14	14	1	0	1	0	59.8	13	13	30.095	8.492	653	342	1427
56	D1BP53|D1BP53;E1LE09|E1LE09	tr|D1BP53|D1BP53_VEIPT;tr|E1LE09|E1LE09_9FIRM	tr|D1BP53|D1BP53_VEIPT 50S ribosomal protein L14 OS=Veillonella parvula (strain ATCC 10790 / DSM 2008 / CCUG 5123 / JCM 12972 / NCTC 11810 / Te3) OX=479436 GN=rplN PE=3 SV=1;tr|E1LE09|E1LE09_9FIRM 50S ribosomal protein L14 OS=Veillonella atypica ACS-134-V-	8	490500000	1173700000	11	11	11	8	11	8	11	8	11	64.8	64.8	64.8	13.346	235.66	308	454	952
57	E1LCT0|E1LCT0	tr|E1LCT0|E1LCT0_9FIRM	tr|E1LCT0|E1LCT0_9FIRM Uncharacterized protein OS=Veillonella atypica ACS-134-V-Col7a OX=866778 GN=HMPREF9684_1694 PE=4 SV=1	8	1353200000	519910000	9	9	4	8	6	8	6	4	2	71.6	71.6	38.5	15.015	196.04	555	336	1398
58	D1BR51|D1BR51	tr|D1BR51|D1BR51_VEIPT	tr|D1BR51|D1BR51_VEIPT Outer membrane autotransporter barrel domain protein OS=Veillonella parvula (strain ATCC 10790 / DSM 2008 / CCUG 5123 / JCM 12972 / NCTC 11810 / Te3) OX=479436 GN=Vpar_0330 PE=4 SV=1	53	9337200	549240000	44	44	36	7	44	7	44	3	36	64.3	64.3	55.4	79.384	323.31	3	1469	1583
59	D1BP51|D1BP51	tr|D1BP51|D1BP51_VEIPT	tr|D1BP51|D1BP51_VEIPT 50S ribosomal protein L5 OS=Veillonella parvula (strain ATCC 10790 / DSM 2008 / CCUG 5123 / JCM 12972 / NCTC 11810 / Te3) OX=479436 GN=rplE PE=3 SV=1	14	1381300000	1318500000	15	15	2	14	15	14	15	1	2	81	81	11.2	20.081	249.59	412	473	1339
60	E1LCR8|E1LCR8	tr|E1LCR8|E1LCR8_9FIRM	tr|E1LCR8|E1LCR8_9FIRM Heavy metal translocating P-type ATPase OS=Veillonella atypica ACS-134-V-Col7a OX=866778 GN=HMPREF9684_1682 PE=3 SV=1	36	1.0701e+09	496410000	32	32	14	29	19	29	19	13	2	52.2	52.2	24.9	77.933	323.31	1463	560	2792
61	E1LE07|E1LE07	tr|E1LE07|E1LE07_9FIRM	tr|E1LE07|E1LE07_9FIRM 50S ribosomal protein L5 OS=Veillonella atypica ACS-134-V-Col7a OX=866778 GN=rplE PE=3 SV=1	14	1454700000	1258600000	15	2	2	15	14	2	1	2	1	81	11.2	11.2	20.039	9.2046	678	309	1256
62	D1BP60|D1BP60	tr|D1BP60|D1BP60_VEIPT	tr|D1BP60|D1BP60_VEIPT 50S ribosomal protein L2 OS=Veillonella parvula (strain ATCC 10790 / DSM 2008 / CCUG 5123 / JCM 12972 / NCTC 11810 / Te3) OX=479436 GN=rplB PE=3 SV=1	18	1.5577e+09	624480000	18	18	2	13	16	13	16	0	2	66.3	66.3	19.6	30.153	200.69	651	398	1573
63	D1BQF0|D1BQF0	tr|D1BQF0|D1BQF0_VEIPT	tr|D1BQF0|D1BQF0_VEIPT TonB-dependent receptor OS=Veillonella parvula (strain ATCC 10790 / DSM 2008 / CCUG 5123 / JCM 12972 / NCTC 11810 / Te3) OX=479436 GN=Vpar_0074 PE=3 SV=1	41	17408000	823710000	43	43	29	12	43	12	43	6	29	75.1	75.1	54.7	69.403	323.31	116	1803	2963
64	D1BP65|D1BP65	tr|D1BP65|D1BP65_VEIPT	tr|D1BP65|D1BP65_VEIPT Elongation factor Tu OS=Veillonella parvula (strain ATCC 10790 / DSM 2008 / CCUG 5123 / JCM 12972 / NCTC 11810 / Te3) OX=479436 GN=tuf PE=3 SV=1	23	471430000	583910000	22	22	4	17	19	17	19	0	3	71.4	71.4	19.2	43.207	323.31	512	567	1836
65	E1LAL6|E1LAL6;E1LE21|E1LE21	tr|E1LAL6|E1LAL6_9FIRM;tr|E1LE21|E1LE21_9FIRM	tr|E1LAL6|E1LAL6_9FIRM Elongation factor Tu OS=Veillonella atypica ACS-134-V-Col7a OX=866778 GN=tuf PE=3 SV=1;tr|E1LE21|E1LE21_9FIRM Elongation factor Tu OS=Veillonella atypica ACS-134-V-Col7a OX=866778 GN=tuf PE=3 SV=1	23	575000000	495410000	22	4	4	21	17	4	1	4	1	71.4	19.2	19.2	43.212	167.43	642	448	1663
66	D1BKY4|D1BKY4	tr|D1BKY4|D1BKY4_VEIPT	tr|D1BKY4|D1BKY4_VEIPT Oligopeptide transporter, OPT family OS=Veillonella parvula (strain ATCC 10790 / DSM 2008 / CCUG 5123 / JCM 12972 / NCTC 11810 / Te3) OX=479436 GN=Vpar_0357 PE=4 SV=1	19	407380000	638960000	12	12	6	7	11	7	11	1	5	16.6	16.6	7	69.525	216.1	134	270	626
67	D1BQD7|D1BQD7;E1LB28|E1LB28	tr|D1BQD7|D1BQD7_VEIPT	tr|D1BQD7|D1BQD7_VEIPT TonB-dependent receptor plug OS=Veillonella parvula (strain ATCC 10790 / DSM 2008 / CCUG 5123 / JCM 12972 / NCTC 11810 / Te3) OX=479436 GN=Vpar_0061 PE=3 SV=1	58	61587000	161910000	44	44	44	3	44	3	44	3	44	57.6	57.6	57.6	91.988	323.31	0	500	500
68	E1L9G4|E1L9G4	tr|E1L9G4|E1L9G4_9FIRM	tr|E1L9G4|E1L9G4_9FIRM Pyruvate synthase OS=Veillonella atypica ACS-134-V-Col7a OX=866778 GN=nifJ PE=3 SV=1	56	624360000	478670000	50	19	19	46	36	18	6	18	6	52.4	20.9	20.9	128.42	285.69	1659	1472	3929
69	E1LEA1|E1LEA1	tr|E1LEA1|E1LEA1_9FIRM	tr|E1LEA1|E1LEA1_9FIRM Outer membrane protein, OMP85 family OS=Veillonella atypica ACS-134-V-Col7a OX=866778 GN=HMPREF9684_1167 PE=4 SV=1	39	805350000	593890000	33	17	17	31	18	17	3	17	3	52.7	33.4	33.4	79.294	323.31	989	1038	3349
70	E1LE06|E1LE06;D1BP50|D1BP50	tr|E1LE06|E1LE06_9FIRM;tr|D1BP50|D1BP50_VEIPT	tr|E1LE06|E1LE06_9FIRM 30S ribosomal protein S14 OS=Veillonella atypica ACS-134-V-Col7a OX=866778 GN=rpsN PE=3 SV=1;tr|D1BP50|D1BP50_VEIPT 30S ribosomal protein S14 OS=Veillonella parvula (strain ATCC 10790 / DSM 2008 / CCUG 5123 / JCM 12972 / NCTC 11810 /	5	1321500000	2495500000	3	3	3	3	3	3	3	3	3	29.2	29.2	29.2	10.018	13.223	15	16	44
71	E1LB15|E1LB15	tr|E1LB15|E1LB15_9FIRM	tr|E1LB15|E1LB15_9FIRM TonB-dependent receptor OS=Veillonella atypica ACS-134-V-Col7a OX=866778 GN=tonB_1 PE=3 SV=1	40	21314000	238160000	21	7	7	11	16	5	2	5	2	37.2	15.5	15.5	69.084	215.65	98	719	1387
72	D1BL54|D1BL54	tr|D1BL54|D1BL54_VEIPT	tr|D1BL54|D1BL54_VEIPT Uncharacterized protein OS=Veillonella parvula (strain ATCC 10790 / DSM 2008 / CCUG 5123 / JCM 12972 / NCTC 11810 / Te3) OX=479436 GN=Vpar_0427 PE=4 SV=1	20	58479000	731330000	16	16	14	3	16	3	16	1	14	62.2	62.2	54.8	30.047	183.26	16	262	358
73	D1BQL0|D1BQL0	tr|D1BQL0|D1BQL0_VEIPT	tr|D1BQL0|D1BQL0_VEIPT Carbon starvation protein CstA OS=Veillonella parvula (strain ATCC 10790 / DSM 2008 / CCUG 5123 / JCM 12972 / NCTC 11810 / Te3) OX=479436 GN=Vpar_0134 PE=3 SV=1	14	101880000	797740000	9	9	2	4	9	4	9	0	2	12	12	3.4	66.439	60.935	22	308	435
74	E1LBD6|E1LBD6	tr|E1LBD6|E1LBD6_9FIRM	tr|E1LBD6|E1LBD6_9FIRM Oligopeptide transporter, OPT family OS=Veillonella atypica ACS-134-V-Col7a OX=866778 GN=HMPREF9684_1407 PE=4 SV=1	19	931910000	213850000	9	3	3	9	6	3	0	3	0	13.2	3.6	3.6	69.569	31.678	303	135	532
75	D1BNM6|D1BNM6	tr|D1BNM6|D1BNM6_VEIPT	tr|D1BNM6|D1BNM6_VEIPT Uncharacterized protein OS=Veillonella parvula (strain ATCC 10790 / DSM 2008 / CCUG 5123 / JCM 12972 / NCTC 11810 / Te3) OX=479436 GN=Vpar_1304 PE=4 SV=1	5	375280000	1.5136e+09	4	4	2	2	4	2	4	0	2	53.3	53.3	30	6.3154	8.613	7	29	56
76	D1BL94|D1BL94	tr|D1BL94|D1BL94_VEIPT	tr|D1BL94|D1BL94_VEIPT OmpA/MotB domain protein OS=Veillonella parvula (strain ATCC 10790 / DSM 2008 / CCUG 5123 / JCM 12972 / NCTC 11810 / Te3) OX=479436 GN=Vpar_0467 PE=4 SV=1	23	23380000	942320000	22	22	22	10	21	10	21	10	21	81.2	81.2	81.2	37.445	323.31	278	1796	4566
77	D1BNU0|D1BNU0	tr|D1BNU0|D1BNU0_VEIPT	tr|D1BNU0|D1BNU0_VEIPT Polyamine aminopropyltransferase OS=Veillonella parvula (strain ATCC 10790 / DSM 2008 / CCUG 5123 / JCM 12972 / NCTC 11810 / Te3) OX=479436 GN=speE PE=3 SV=1	17	267200000	57420000	11	11	8	3	11	3	11	1	8	41.9	41.9	31.5	31.646	32.832	6	85	95
78	E1LE20|E1LE20;D1BP64|D1BP64	tr|E1LE20|E1LE20_9FIRM;tr|D1BP64|D1BP64_VEIPT	tr|E1LE20|E1LE20_9FIRM 30S ribosomal protein S10 OS=Veillonella atypica ACS-134-V-Col7a OX=866778 GN=rpsJ PE=3 SV=1;tr|D1BP64|D1BP64_VEIPT 30S ribosomal protein S10 OS=Veillonella parvula (strain ATCC 10790 / DSM 2008 / CCUG 5123 / JCM 12972 / NCTC 11810 /	9	157360000	980810000	9	9	9	7	9	7	9	7	9	63.1	63.1	63.1	11.643	90.073	49	256	350
79	E1LA76|E1LA76	tr|E1LA76|E1LA76_9FIRM	tr|E1LA76|E1LA76_9FIRM L-lactate permease OS=Veillonella atypica ACS-134-V-Col7a OX=866778 GN=HMPREF9684_1346 PE=3 SV=1	16	1.0425e+09	326270000	10	2	2	8	8	1	0	1	0	20.7	4.4	4.4	57.02	7.5712	295	114	574
80	D1BPG5|D1BPG5	tr|D1BPG5|D1BPG5_VEIPT	tr|D1BPG5|D1BPG5_VEIPT L-lactate permease OS=Veillonella parvula (strain ATCC 10790 / DSM 2008 / CCUG 5123 / JCM 12972 / NCTC 11810 / Te3) OX=479436 GN=Vpar_1596 PE=3 SV=1	17	1092700000	320660000	11	11	3	8	11	8	11	1	3	22.4	22.4	6.1	57.097	62.285	301	118	578
81	D1BNT3|D1BNT3	tr|D1BNT3|D1BNT3_VEIPT	tr|D1BNT3|D1BNT3_VEIPT Transcription-repair-coupling factor OS=Veillonella parvula (strain ATCC 10790 / DSM 2008 / CCUG 5123 / JCM 12972 / NCTC 11810 / Te3) OX=479436 GN=mfd PE=3 SV=1	62	2749400	44420000	13	13	5	5	11	5	11	1	3	10.3	10.3	4.3	124.45	11.289	8	17	30
82	E1LBX1|E1LBX1	tr|E1LBX1|E1LBX1_9FIRM	tr|E1LBX1|E1LBX1_9FIRM Glutaconyl-CoA decarboxylase subunit beta OS=Veillonella atypica ACS-134-V-Col7a OX=866778 GN=gcdB PE=4 SV=1	8	6.0729e+09	1.0308e+09	9	9	3	9	6	9	6	3	1	15.5	15.5	6.4	38.719	323.31	454	114	779
83	D1BPN3|D1BPN3	tr|D1BPN3|D1BPN3_VEIPT	tr|D1BPN3|D1BPN3_VEIPT S-layer domain protein OS=Veillonella parvula (strain ATCC 10790 / DSM 2008 / CCUG 5123 / JCM 12972 / NCTC 11810 / Te3) OX=479436 GN=Vpar_1664 PE=3 SV=1	44	2413600	446200000	38	38	38	6	38	6	38	6	38	60.6	60.6	60.6	88.29	323.31	3	488	1034
84	D1BN31|D1BN31	tr|D1BN31|D1BN31_VEIPT	tr|D1BN31|D1BN31_VEIPT Cell division protein FtsZ OS=Veillonella parvula (strain ATCC 10790 / DSM 2008 / CCUG 5123 / JCM 12972 / NCTC 11810 / Te3) OX=479436 GN=ftsZ PE=3 SV=1	20	411400000	910970000	20	20	11	11	19	11	19	2	11	74	74	50.6	36.012	323.31	144	386	824
85	D1BNG3|D1BNG3	tr|D1BNG3|D1BNG3_VEIPT	tr|D1BNG3|D1BNG3_VEIPT Sodium ion-translocating decarboxylase, beta subunit OS=Veillonella parvula (strain ATCC 10790 / DSM 2008 / CCUG 5123 / JCM 12972 / NCTC 11810 / Te3) OX=479436 GN=Vpar_1240 PE=4 SV=1	9	6.5498e+09	1133400000	8	2	2	7	7	1	2	1	2	15.5	4.3	4.3	38.73	10.9	680	189	1155
86	D1BMD0|D1BMD0	tr|D1BMD0|D1BMD0_VEIPT	tr|D1BMD0|D1BMD0_VEIPT 30S ribosomal protein S2 OS=Veillonella parvula (strain ATCC 10790 / DSM 2008 / CCUG 5123 / JCM 12972 / NCTC 11810 / Te3) OX=479436 GN=rpsB PE=3 SV=1	20	1308500000	710140000	22	22	7	17	21	17	21	2	7	80.1	80.1	27.8	31.282	288.94	741	472	1752
87	D1BLF1|D1BLF1	tr|D1BLF1|D1BLF1_VEIPT	tr|D1BLF1|D1BLF1_VEIPT Outer membrane efflux protein OS=Veillonella parvula (strain ATCC 10790 / DSM 2008 / CCUG 5123 / JCM 12972 / NCTC 11810 / Te3) OX=479436 GN=Vpar_0525 PE=3 SV=1	27	81922000	821790000	26	26	24	10	25	10	25	8	23	64.6	64.6	60.1	51.646	323.31	95	535	1655
88	E1LCL2|E1LCL2	tr|E1LCL2|E1LCL2_9FIRM	tr|E1LCL2|E1LCL2_9FIRM Bifunctional protein HldE OS=Veillonella atypica ACS-134-V-Col7a OX=866778 GN=rfaE PE=3 SV=1	27	10790000	205260000	8	5	5	7	4	4	1	4	1	16.7	11.2	11.2	53.746	8.1851	15	6	22
89	D1BPW4|D1BPW4	tr|D1BPW4|D1BPW4_VEIPT	tr|D1BPW4|D1BPW4_VEIPT Catalase OS=Veillonella parvula (strain ATCC 10790 / DSM 2008 / CCUG 5123 / JCM 12972 / NCTC 11810 / Te3) OX=479436 GN=Vpar_1745 PE=3 SV=1	27	2038000	585700000	22	22	22	2	22	2	22	2	22	62.6	62.6	62.6	55.398	323.31	0	406	406
90	D1BLZ4|D1BLZ4	tr|D1BLZ4|D1BLZ4_VEIPT	tr|D1BLZ4|D1BLZ4_VEIPT TonB-dependent receptor plug OS=Veillonella parvula (strain ATCC 10790 / DSM 2008 / CCUG 5123 / JCM 12972 / NCTC 11810 / Te3) OX=479436 GN=Vpar_0719 PE=3 SV=1	47	9898700	351730000	41	41	31	11	41	11	41	10	31	56	56	43.5	86.703	323.31	2	801	803
91	D1BMH3|D1BMH3	tr|D1BMH3|D1BMH3_VEIPT	tr|D1BMH3|D1BMH3_VEIPT Homoserine dehydrogenase OS=Veillonella parvula (strain ATCC 10790 / DSM 2008 / CCUG 5123 / JCM 12972 / NCTC 11810 / Te3) OX=479436 GN=Vpar_0899 PE=3 SV=1	32	4514700	119310000	17	17	13	2	14	2	14	1	10	48	48	32.9	46.806	85.587	7	60	109
92	D1BP57|D1BP57	tr|D1BP57|D1BP57_VEIPT	tr|D1BP57|D1BP57_VEIPT 30S ribosomal protein S3 OS=Veillonella parvula (strain ATCC 10790 / DSM 2008 / CCUG 5123 / JCM 12972 / NCTC 11810 / Te3) OX=479436 GN=rpsC PE=3 SV=1	13	706760000	560320000	14	2	2	13	14	1	2	1	2	59.9	17.6	17.6	24.57	270.92	200	234	594
93	E1LE23|E1LE23;D1BP67|D1BP67	tr|E1LE23|E1LE23_9FIRM;tr|D1BP67|D1BP67_VEIPT	tr|E1LE23|E1LE23_9FIRM 30S ribosomal protein S7 OS=Veillonella atypica ACS-134-V-Col7a OX=866778 GN=rpsG PE=3 SV=1;tr|D1BP67|D1BP67_VEIPT 30S ribosomal protein S7 OS=Veillonella parvula (strain ATCC 10790 / DSM 2008 / CCUG 5123 / JCM 12972 / NCTC 11810 / T	11	2173700000	448290000	11	11	11	10	11	10	11	10	11	67.3	67.3	67.3	17.937	239.57	555	320	1319
94	D1BPN9|D1BPN9	tr|D1BPN9|D1BPN9_VEIPT	tr|D1BPN9|D1BPN9_VEIPT DNA helicase OS=Veillonella parvula (strain ATCC 10790 / DSM 2008 / CCUG 5123 / JCM 12972 / NCTC 11810 / Te3) OX=479436 GN=Vpar_1670 PE=4 SV=1	78	2649400	40691000	18	18	14	4	15	4	15	1	13	12.8	12.8	10.6	145.77	27.439	4	18	26
95	D1BMU1|D1BMU1	tr|D1BMU1|D1BMU1_VEIPT	tr|D1BMU1|D1BMU1_VEIPT Glutamate--tRNA ligase OS=Veillonella parvula (strain ATCC 10790 / DSM 2008 / CCUG 5123 / JCM 12972 / NCTC 11810 / Te3) OX=479436 GN=gltX PE=3 SV=1	29	4655200	12344000	6	2	2	3	6	1	2	1	2	13.7	4.9	4.9	55.425	5.951	7	14	24
96	E1LE13|E1LE13	tr|E1LE13|E1LE13_9FIRM	tr|E1LE13|E1LE13_9FIRM 30S ribosomal protein S3 OS=Veillonella atypica ACS-134-V-Col7a OX=866778 GN=rpsC PE=3 SV=1	13	706760000	560320000	14	14	2	14	12	14	12	2	0	60.2	60.2	17.6	24.51	323.31	263	168	546
97	D1BMY5|D1BMY5	tr|D1BMY5|D1BMY5_VEIPT	tr|D1BMY5|D1BMY5_VEIPT Phosphoenolpyruvate synthase OS=Veillonella parvula (strain ATCC 10790 / DSM 2008 / CCUG 5123 / JCM 12972 / NCTC 11810 / Te3) OX=479436 GN=Vpar_1061 PE=3 SV=1	49	3386100	130930000	40	40	23	7	40	7	40	3	23	56	56	34.9	88.152	323.31	6	255	276
98	E1L9D2|E1L9D2	tr|E1L9D2|E1L9D2_9FIRM	tr|E1L9D2|E1L9D2_9FIRM Cell division protein FtsZ OS=Veillonella atypica ACS-134-V-Col7a OX=866778 GN=ftsZ PE=3 SV=1	19	507550000	595420000	16	7	7	16	9	7	1	7	1	53.3	30	30	35.808	154.38	199	208	593
99	E1LDH4|E1LDH4	tr|E1LDH4|E1LDH4_9FIRM	tr|E1LDH4|E1LDH4_9FIRM Carbon starvation protein CstA OS=Veillonella atypica ACS-134-V-Col7a OX=866778 GN=cstA PE=3 SV=1	14	187140000	223850000	8	1	1	5	7	1	0	1	0	10	1.5	1.5	66.482	3.0193	25	100	137
100	E1LA29|E1LA29	tr|E1LA29|E1LA29_9FIRM	tr|E1LA29|E1LA29_9FIRM Oligopeptide transporter, OPT family OS=Veillonella atypica ACS-134-V-Col7a OX=866778 GN=HMPREF9684_1847 PE=4 SV=1	17	1153100000	310570000	10	10	6	10	6	10	6	6	2	13.4	13.4	7.6	72.789	229.17	211	47	334
101	D1BP35|D1BP35	tr|D1BP35|D1BP35_VEIPT	tr|D1BP35|D1BP35_VEIPT 50S ribosomal protein L17 OS=Veillonella parvula (strain ATCC 10790 / DSM 2008 / CCUG 5123 / JCM 12972 / NCTC 11810 / Te3) OX=479436 GN=rplQ PE=3 SV=1	8	1167800000	900840000	9	9	2	5	8	5	8	0	2	63.1	63.1	11.7	12.656	141.94	274	167	695
102	D1BM74|D1BM74	tr|D1BM74|D1BM74_VEIPT	tr|D1BM74|D1BM74_VEIPT Protein translocase subunit SecA OS=Veillonella parvula (strain ATCC 10790 / DSM 2008 / CCUG 5123 / JCM 12972 / NCTC 11810 / Te3) OX=479436 GN=secA PE=3 SV=1	49	48312000	142260000	36	36	21	13	33	13	33	1	19	49.4	49.4	30.2	92.543	323.31	21	177	265
103	D1BQC2|D1BQC2	tr|D1BQC2|D1BQC2_VEIPT	tr|D1BQC2|D1BQC2_VEIPT Hemagluttinin domain protein OS=Veillonella parvula (strain ATCC 10790 / DSM 2008 / CCUG 5123 / JCM 12972 / NCTC 11810 / Te3) OX=479436 GN=Vpar_0046 PE=3 SV=1	113	3500900	408550000	90	85	40	9	87	8	82	2	40	51.5	50.1	27.3	217.39	323.31	4	834	987
104	E1LEB2|E1LEB2	tr|E1LEB2|E1LEB2_9FIRM	tr|E1LEB2|E1LEB2_9FIRM Uncharacterized protein OS=Veillonella atypica ACS-134-V-Col7a OX=866778 GN=HMPREF9684_0069 PE=4 SV=1	5	765520000	700050000	4	2	2	4	2	2	0	2	0	53.3	30	30	6.2613	3.8286	22	10	39
105	E1LE18|E1LE18;D1BP62|D1BP62	tr|E1LE18|E1LE18_9FIRM;tr|D1BP62|D1BP62_VEIPT	tr|E1LE18|E1LE18_9FIRM 50S ribosomal protein L4 OS=Veillonella atypica ACS-134-V-Col7a OX=866778 GN=rplD PE=3 SV=1;tr|D1BP62|D1BP62_VEIPT 50S ribosomal protein L4 OS=Veillonella parvula (strain ATCC 10790 / DSM 2008 / CCUG 5123 / JCM 12972 / NCTC 11810 / T	12	581310000	261290000	10	10	10	9	9	9	9	9	9	65.7	65.7	65.7	22.572	323.31	325	284	913
106	E1L9L9|E1L9L9	tr|E1L9L9|E1L9L9_9FIRM	tr|E1L9L9|E1L9L9_9FIRM 30S ribosomal protein S2 OS=Veillonella atypica ACS-134-V-Col7a OX=866778 GN=rpsB PE=3 SV=1	17	1.5486e+09	436830000	17	2	2	17	14	2	0	2	0	79.9	18.4	18.4	26.796	98.936	746	367	1645
107	D1BLG7|D1BLG7	tr|D1BLG7|D1BLG7_VEIPT	tr|D1BLG7|D1BLG7_VEIPT Tetraacyldisaccharide 4-kinase OS=Veillonella parvula (strain ATCC 10790 / DSM 2008 / CCUG 5123 / JCM 12972 / NCTC 11810 / Te3) OX=479436 GN=lpxK PE=3 SV=1	21	650210	193080000	11	11	10	1	11	1	11	0	10	34.9	34.9	32.7	40.389	43.908	0	27	36
108	D1BNT0|D1BNT0	tr|D1BNT0|D1BNT0_VEIPT	tr|D1BNT0|D1BNT0_VEIPT Histone family protein DNA-binding protein OS=Veillonella parvula (strain ATCC 10790 / DSM 2008 / CCUG 5123 / JCM 12972 / NCTC 11810 / Te3) OX=479436 GN=Vpar_1359 PE=3 SV=1	6	25885000	1.032e+09	5	5	2	1	4	1	4	0	2	52.5	52.5	23.2	10.584	91.575	0	161	220
109	D1BP72|D1BP72	tr|D1BP72|D1BP72_VEIPT	tr|D1BP72|D1BP72_VEIPT DNA-directed RNA polymerase subunit beta OS=Veillonella parvula (strain ATCC 10790 / DSM 2008 / CCUG 5123 / JCM 12972 / NCTC 11810 / Te3) OX=479436 GN=rpoB PE=3 SV=1	72	58591000	82253000	51	11	11	37	46	2	11	2	11	36.8	8.4	8.4	155.28	203.65	195	216	599
110	D1BPX9|D1BPX9	tr|D1BPX9|D1BPX9_VEIPT	tr|D1BPX9|D1BPX9_VEIPT Uncharacterized protein OS=Veillonella parvula (strain ATCC 10790 / DSM 2008 / CCUG 5123 / JCM 12972 / NCTC 11810 / Te3) OX=479436 GN=Vpar_1760 PE=4 SV=1	19	202380000	439660000	18	18	11	7	18	7	18	0	11	79.4	79.4	60.1	33.136	323.31	33	277	347
111	E1LE03|E1LE03	tr|E1LE03|E1LE03_9FIRM	tr|E1LE03|E1LE03_9FIRM 50S ribosomal protein L18 OS=Veillonella atypica ACS-134-V-Col7a OX=866778 GN=rplR PE=3 SV=1	7	1.6263e+09	764640000	9	1	1	9	7	1	0	1	0	75.8	11.7	11.7	12.825	6.7589	295	88	564
112	E1LBW3|E1LBW3	tr|E1LBW3|E1LBW3_9FIRM	tr|E1LBW3|E1LBW3_9FIRM Methylmalonyl-CoA mutase domain protein OS=Veillonella atypica ACS-134-V-Col7a OX=866778 GN=HMPREF9684_0449 PE=4 SV=1	31	800130000	455550000	28	3	3	27	26	3	2	3	2	57.3	7.8	7.8	60.451	101.56	812	215	1442
113	E1LA50|E1LA50	tr|E1LA50|E1LA50_9FIRM	tr|E1LA50|E1LA50_9FIRM 30S ribosomal protein S6 OS=Veillonella atypica ACS-134-V-Col7a OX=866778 GN=rpsF PE=3 SV=1	7	504510000	622240000	5	2	2	5	3	2	0	2	0	43.6	29.8	29.8	10.739	20.704	13	12	40
114	D1BNH1|D1BNH1	tr|D1BNH1|D1BNH1_VEIPT	tr|D1BNH1|D1BNH1_VEIPT Methylmalonyl-CoA mutase, large subunit OS=Veillonella parvula (strain ATCC 10790 / DSM 2008 / CCUG 5123 / JCM 12972 / NCTC 11810 / Te3) OX=479436 GN=Vpar_1248 PE=4 SV=1	31	598900000	536410000	29	29	4	24	27	24	27	0	3	59.3	59.3	9.9	60.354	323.31	723	285	1511
115	E1LE00|E1LE00	tr|E1LE00|E1LE00_9FIRM	tr|E1LE00|E1LE00_9FIRM 50S ribosomal protein L15 OS=Veillonella atypica ACS-134-V-Col7a OX=866778 GN=rplO PE=3 SV=1	10	37854000	613280000	7	2	2	6	5	2	0	2	0	55.1	13.6	13.6	15.61	2.9366	8	68	99
116	D1BP44|D1BP44	tr|D1BP44|D1BP44_VEIPT	tr|D1BP44|D1BP44_VEIPT 50S ribosomal protein L15 OS=Veillonella parvula (strain ATCC 10790 / DSM 2008 / CCUG 5123 / JCM 12972 / NCTC 11810 / Te3) OX=479436 GN=rplO PE=3 SV=1	10	36321000	647150000	9	9	4	4	9	4	9	0	4	62.8	62.8	21.6	15.637	140.15	4	91	119
117	E1LAQ3|E1LAQ3;D1BMP8|D1BMP8	tr|E1LAQ3|E1LAQ3_9FIRM;tr|D1BMP8|D1BMP8_VEIPT	tr|E1LAQ3|E1LAQ3_9FIRM 50S ribosomal protein L19 OS=Veillonella atypica ACS-134-V-Col7a OX=866778 GN=rplS PE=3 SV=1;tr|D1BMP8|D1BMP8_VEIPT 50S ribosomal protein L19 OS=Veillonella parvula (strain ATCC 10790 / DSM 2008 / CCUG 5123 / JCM 12972 / NCTC 11810 /	9	3.1445e+09	739780000	7	7	7	7	7	7	7	7	7	46.9	46.9	46.9	13.065	151.57	629	298	1517
118	D1BP30|D1BP30	tr|D1BP30|D1BP30_VEIPT	tr|D1BP30|D1BP30_VEIPT Pyruvate flavodoxin/ferredoxin oxidoreductase domain protein OS=Veillonella parvula (strain ATCC 10790 / DSM 2008 / CCUG 5123 / JCM 12972 / NCTC 11810 / Te3) OX=479436 GN=Vpar_1461 PE=4 SV=1	32	104190000	284550000	29	29	9	19	25	19	25	3	8	53	53	14.4	64.103	323.31	81	170	499
119	D1BR57|D1BR57	tr|D1BR57|D1BR57_VEIPT	tr|D1BR57|D1BR57_VEIPT 30S ribosomal protein S6 OS=Veillonella parvula (strain ATCC 10790 / DSM 2008 / CCUG 5123 / JCM 12972 / NCTC 11810 / Te3) OX=479436 GN=rpsF PE=3 SV=1	7	367820000	1094100000	5	5	2	4	5	4	5	1	2	43.6	43.6	29.8	10.785	81.615	8	30	114
120	D1BP47|D1BP47	tr|D1BP47|D1BP47_VEIPT	tr|D1BP47|D1BP47_VEIPT 50S ribosomal protein L18 OS=Veillonella parvula (strain ATCC 10790 / DSM 2008 / CCUG 5123 / JCM 12972 / NCTC 11810 / Te3) OX=479436 GN=rplR PE=3 SV=1	7	1.5946e+09	800390000	9	9	1	8	8	8	8	0	1	75.8	75.8	11.7	12.811	205.31	182	122	618
121	E1LDZ1|E1LDZ1	tr|E1LDZ1|E1LDZ1_9FIRM	tr|E1LDZ1|E1LDZ1_9FIRM 50S ribosomal protein L17 OS=Veillonella atypica ACS-134-V-Col7a OX=866778 GN=rplQ PE=3 SV=1	8	1259300000	527700000	9	2	2	7	7	2	1	2	1	63.1	11.7	11.7	12.646	2.9819	291	165	707
122	D1BP49|D1BP49;E1LE05|E1LE05	tr|D1BP49|D1BP49_VEIPT;tr|E1LE05|E1LE05_9FIRM	tr|D1BP49|D1BP49_VEIPT 30S ribosomal protein S8 OS=Veillonella parvula (strain ATCC 10790 / DSM 2008 / CCUG 5123 / JCM 12972 / NCTC 11810 / Te3) OX=479436 GN=rpsH PE=3 SV=1;tr|E1LE05|E1LE05_9FIRM 30S ribosomal protein S8 OS=Veillonella atypica ACS-134-V-Co	9	70014000	386700000	9	9	9	4	7	4	7	4	7	71.1	71.1	71.1	14.006	248.63	15	78	201
123	D1BLF6|D1BLF6	tr|D1BLF6|D1BLF6_VEIPT	tr|D1BLF6|D1BLF6_VEIPT Outer membrane chaperone Skp (OmpH) OS=Veillonella parvula (strain ATCC 10790 / DSM 2008 / CCUG 5123 / JCM 12972 / NCTC 11810 / Te3) OX=479436 GN=Vpar_0530 PE=3 SV=1	13	19177000	483110000	8	8	8	2	7	2	7	2	7	58.9	58.9	58.9	18.659	209.32	0	53	225
124	D1BPM5|D1BPM5	tr|D1BPM5|D1BPM5_VEIPT	tr|D1BPM5|D1BPM5_VEIPT Oligopeptide transporter, OPT family OS=Veillonella parvula (strain ATCC 10790 / DSM 2008 / CCUG 5123 / JCM 12972 / NCTC 11810 / Te3) OX=479436 GN=Vpar_1656 PE=4 SV=1	14	861860000	411830000	8	4	4	5	8	1	4	1	4	10	4.2	4.2	73.005	138.2	150	95	323
125	D1BQQ1|D1BQQ1	tr|D1BQQ1|D1BQQ1_VEIPT	tr|D1BQQ1|D1BQQ1_VEIPT Extracellular solute-binding protein family 3 OS=Veillonella parvula (strain ATCC 10790 / DSM 2008 / CCUG 5123 / JCM 12972 / NCTC 11810 / Te3) OX=479436 GN=Vpar_0176 PE=4 SV=1	17	421000000	548770000	16	16	10	6	16	6	16	1	10	76.5	76.5	42.3	28.249	323.31	153	133	383
126	D1BP38|D1BP38	tr|D1BP38|D1BP38_VEIPT	tr|D1BP38|D1BP38_VEIPT 30S ribosomal protein S13 OS=Veillonella parvula (strain ATCC 10790 / DSM 2008 / CCUG 5123 / JCM 12972 / NCTC 11810 / Te3) OX=479436 GN=rpsM PE=3 SV=1	9	193680000	1095600000	11	2	2	8	10	0	2	0	2	53.3	8.2	8.2	13.822	2.3625	72	143	270
127	E1LE27|E1LE27	tr|E1LE27|E1LE27_9FIRM	tr|E1LE27|E1LE27_9FIRM DNA-directed RNA polymerase subunit beta (Fragment) OS=Veillonella atypica ACS-134-V-Col7a OX=866778 GN=rpoB PE=3 SV=1	72	81236000	42446000	52	52	12	47	37	47	37	12	2	39.7	39.7	10.6	151.11	318.11	265	144	547
128	E1LBZ5|E1LBZ5;D1BNE0|D1BNE0	tr|E1LBZ5|E1LBZ5_9FIRM;tr|D1BNE0|D1BNE0_VEIPT	tr|E1LBZ5|E1LBZ5_9FIRM 50S ribosomal protein L21 OS=Veillonella atypica ACS-134-V-Col7a OX=866778 GN=rplU PE=3 SV=1;tr|D1BNE0|D1BNE0_VEIPT 50S ribosomal protein L21 OS=Veillonella parvula (strain ATCC 10790 / DSM 2008 / CCUG 5123 / JCM 12972 / NCTC 11810 /	6	562750000	965610000	5	5	5	5	4	5	4	5	4	43.7	43.7	43.7	11.332	14.221	43	44	101
129	E1LDZ4|E1LDZ4	tr|E1LDZ4|E1LDZ4_9FIRM	tr|E1LDZ4|E1LDZ4_9FIRM 30S ribosomal protein S13 OS=Veillonella atypica ACS-134-V-Col7a OX=866778 GN=rpsM PE=3 SV=1	9	227560000	983110000	11	11	2	10	8	10	8	2	0	53.3	53.3	8.2	13.836	51.879	75	133	259
130	E1LD97|E1LD97	tr|E1LD97|E1LD97_9FIRM	tr|E1LD97|E1LD97_9FIRM Protein translocase subunit SecA OS=Veillonella atypica ACS-134-V-Col7a OX=866778 GN=secA PE=3 SV=1	50	70320000	73922000	28	13	13	25	15	13	1	13	1	37.9	18.6	18.6	92.386	150.52	94	69	190
131	E1LA46|E1LA46	tr|E1LA46|E1LA46_9FIRM	tr|E1LA46|E1LA46_9FIRM Outer membrane autotransporter barrel domain protein OS=Veillonella atypica ACS-134-V-Col7a OX=866778 GN=HMPREF9684_0899 PE=4 SV=1	50	5963000	60614000	12	6	5	8	7	5	1	4	0	15.5	8.4	7.4	79.424	4.8274	15	217	256
132	D1BLM4|D1BLM4	tr|D1BLM4|D1BLM4_VEIPT	tr|D1BLM4|D1BLM4_VEIPT Protein translocase subunit SecD OS=Veillonella parvula (strain ATCC 10790 / DSM 2008 / CCUG 5123 / JCM 12972 / NCTC 11810 / Te3) OX=479436 GN=secD PE=3 SV=1	24	596900000	196210000	20	20	10	12	18	12	18	2	9	44.3	44.3	28.1	45.06	312.83	295	186	827
133	E1LB55|E1LB55	tr|E1LB55|E1LB55_9FIRM	tr|E1LB55|E1LB55_9FIRM Chaperone protein DnaK OS=Veillonella atypica ACS-134-V-Col7a OX=866778 GN=dnaK PE=2 SV=1	38	42105000	379370000	33	5	5	23	28	4	0	4	0	52.6	10.1	10.1	65.5	12.031	54	300	403
134	D1BMF6|D1BMF6	tr|D1BMF6|D1BMF6_VEIPT	tr|D1BMF6|D1BMF6_VEIPT Chaperone protein DnaK OS=Veillonella parvula (strain ATCC 10790 / DSM 2008 / CCUG 5123 / JCM 12972 / NCTC 11810 / Te3) OX=479436 GN=dnaK PE=2 SV=1	37	42577000	471520000	35	35	7	20	35	20	35	1	7	57.1	57.1	14.7	65.663	323.31	31	442	522
135	E1LDX5|E1LDX5	tr|E1LDX5|E1LDX5_9FIRM	tr|E1LDX5|E1LDX5_9FIRM Hydrogenase, Fe-only OS=Veillonella atypica ACS-134-V-Col7a OX=866778 GN=HMPREF9684_0892 PE=4 SV=1	30	94705000	103690000	18	7	7	14	12	7	1	7	1	36.6	13.9	13.9	52.226	5.1974	56	162	232
136	D1BQC4|D1BQC4	tr|D1BQC4|D1BQC4_VEIPT	tr|D1BQC4|D1BQC4_VEIPT Hemagluttinin domain protein OS=Veillonella parvula (strain ATCC 10790 / DSM 2008 / CCUG 5123 / JCM 12972 / NCTC 11810 / Te3) OX=479436 GN=Vpar_0048 PE=3 SV=1	104	9558500	125110000	57	37	37	3	56	1	36	1	36	42.9	28.9	28.9	183.88	323.31	5	354	421
137	D1BMP2|D1BMP2	tr|D1BMP2|D1BMP2_VEIPT	tr|D1BMP2|D1BMP2_VEIPT DNA topoisomerase 1 OS=Veillonella parvula (strain ATCC 10790 / DSM 2008 / CCUG 5123 / JCM 12972 / NCTC 11810 / Te3) OX=479436 GN=topA PE=3 SV=1	55	493750	49151000	19	19	12	3	16	3	16	0	11	25.3	25.3	18.6	89.286	40.475	3	23	32
138	D1BNR7|D1BNR7	tr|D1BNR7|D1BNR7_VEIPT	tr|D1BNR7|D1BNR7_VEIPT Putative sugar-specific permease SgaT/UlaA OS=Veillonella parvula (strain ATCC 10790 / DSM 2008 / CCUG 5123 / JCM 12972 / NCTC 11810 / Te3) OX=479436 GN=Vpar_1346 PE=4 SV=1	10	106810000	290650000	4	4	2	2	3	2	3	0	1	13.4	13.4	4.6	47.769	83.424	13	21	55
139	D1BPM0|D1BPM0	tr|D1BPM0|D1BPM0_VEIPT	tr|D1BPM0|D1BPM0_VEIPT Iron-sulfur cluster binding protein OS=Veillonella parvula (strain ATCC 10790 / DSM 2008 / CCUG 5123 / JCM 12972 / NCTC 11810 / Te3) OX=479436 GN=Vpar_1651 PE=4 SV=1	27	174210000	426610000	29	29	7	20	28	20	28	1	7	57.4	57.4	20.8	53.4	296.15	330	644	1369
140	D1BLX7|D1BLX7	tr|D1BLX7|D1BLX7_VEIPT	tr|D1BLX7|D1BLX7_VEIPT 2-nitropropane dioxygenase NPD OS=Veillonella parvula (strain ATCC 10790 / DSM 2008 / CCUG 5123 / JCM 12972 / NCTC 11810 / Te3) OX=479436 GN=Vpar_0701 PE=4 SV=1	18	642850000	100090000	18	3	3	15	16	0	3	0	3	77.7	17.9	17.9	33.219	32.907	219	94	397
141	E1LCE0|E1LCE0	tr|E1LCE0|E1LCE0_9FIRM	tr|E1LCE0|E1LCE0_9FIRM Oxidoreductase, 2-nitropropane dioxygenase family protein OS=Veillonella atypica ACS-134-V-Col7a OX=866778 GN=HMPREF9684_1751 PE=4 SV=1	19	684340000	89935000	18	18	3	18	14	18	14	3	1	69.8	69.8	10.1	33.213	323.31	373	90	543
142	E1LA34|E1LA34	tr|E1LA34|E1LA34_9FIRM	tr|E1LA34|E1LA34_9FIRM Iron-sulfur cluster-binding protein OS=Veillonella atypica ACS-134-V-Col7a OX=866778 GN=HMPREF9684_1852 PE=4 SV=1	27	186520000	396730000	24	2	2	21	21	2	0	2	0	42	5.4	5.4	53.386	17.294	375	507	1178
143	D1BQE2|D1BQE2	tr|D1BQE2|D1BQE2_VEIPT	tr|D1BQE2|D1BQE2_VEIPT TonB-dependent receptor plug OS=Veillonella parvula (strain ATCC 10790 / DSM 2008 / CCUG 5123 / JCM 12972 / NCTC 11810 / Te3) OX=479436 GN=Vpar_0066 PE=3 SV=1	40	50067000	264200000	31	29	25	9	31	8	29	4	25	48	44.1	38.6	74.037	323.31	139	493	1018
144	E1LAV7|E1LAV7	tr|E1LAV7|E1LAV7_9FIRM	tr|E1LAV7|E1LAV7_9FIRM FeS assembly ATPase SufC OS=Veillonella atypica ACS-134-V-Col7a OX=866778 GN=sufC PE=3 SV=1	18	41684000	258140000	13	13	5	11	11	11	11	4	3	52.6	52.6	20.2	27.191	31.153	13	31	54
145	D1BQW4|D1BQW4	tr|D1BQW4|D1BQW4_VEIPT	tr|D1BQW4|D1BQW4_VEIPT Periplasmic solute binding protein OS=Veillonella parvula (strain ATCC 10790 / DSM 2008 / CCUG 5123 / JCM 12972 / NCTC 11810 / Te3) OX=479436 GN=Vpar_0240 PE=3 SV=1	21	63151000	311300000	17	17	14	6	17	6	17	4	14	61.5	61.5	48	33.653	264.77	6	260	570
146	D1BLX6|D1BLX6;E1LCD9|E1LCD9	tr|D1BLX6|D1BLX6_VEIPT;tr|E1LCD9|E1LCD9_9FIRM	tr|D1BLX6|D1BLX6_VEIPT Acyl carrier protein OS=Veillonella parvula (strain ATCC 10790 / DSM 2008 / CCUG 5123 / JCM 12972 / NCTC 11810 / Te3) OX=479436 GN=acpP PE=3 SV=1;tr|E1LCD9|E1LCD9_9FIRM Acyl carrier protein OS=Veillonella atypica ACS-134-V-Col7a OX=8	2	242510000	1158200000	2	2	2	1	2	1	2	1	2	21.1	21.1	21.1	8.4684	15.418	5	14	22
147	E1LA35|E1LA35	tr|E1LA35|E1LA35_9FIRM	tr|E1LA35|E1LA35_9FIRM LUD_dom domain-containing protein OS=Veillonella atypica ACS-134-V-Col7a OX=866778 GN=HMPREF9684_1853 PE=4 SV=1	11	179590000	267940000	7	3	3	7	5	3	1	3	1	37.6	20.2	20.2	26.973	60.67	79	82	173
148	E1LE08|E1LE08;D1BP52|D1BP52	tr|E1LE08|E1LE08_9FIRM;tr|D1BP52|D1BP52_VEIPT	tr|E1LE08|E1LE08_9FIRM 50S ribosomal protein L24 OS=Veillonella atypica ACS-134-V-Col7a OX=866778 GN=rplX PE=3 SV=1;tr|D1BP52|D1BP52_VEIPT 50S ribosomal protein L24 OS=Veillonella parvula (strain ATCC 10790 / DSM 2008 / CCUG 5123 / JCM 12972 / NCTC 11810 /	6	7000200	790870000	7	7	7	4	7	4	7	4	7	60.4	60.4	60.4	11.364	123.13	3	64	71
149	D1BPW1|D1BPW1	tr|D1BPW1|D1BPW1_VEIPT	tr|D1BPW1|D1BPW1_VEIPT Putative cytoplasmic protein OS=Veillonella parvula (strain ATCC 10790 / DSM 2008 / CCUG 5123 / JCM 12972 / NCTC 11810 / Te3) OX=479436 GN=Vpar_1742 PE=4 SV=1	50	2557300	103190000	27	27	27	3	26	3	26	3	26	32.6	32.6	32.6	86.766	73.835	7	107	115
150	D1BLS1|D1BLS1	tr|D1BLS1|D1BLS1_VEIPT	tr|D1BLS1|D1BLS1_VEIPT Uncharacterized protein OS=Veillonella parvula (strain ATCC 10790 / DSM 2008 / CCUG 5123 / JCM 12972 / NCTC 11810 / Te3) OX=479436 GN=Vpar_0645 PE=4 SV=1	8	426420000	1370900000	8	3	3	4	7	0	3	0	3	62.8	29.7	29.7	15.024	164.97	338	517	1618
151	E1LAM5|E1LAM5	tr|E1LAM5|E1LAM5_9FIRM	tr|E1LAM5|E1LAM5_9FIRM Putative aspartate ammonia-lyase OS=Veillonella atypica ACS-134-V-Col7a OX=866778 GN=HMPREF9684_1090 PE=4 SV=1	26	192470000	161730000	20	5	5	18	17	4	3	4	3	40.3	13	13	51.275	119.7	227	212	492
152	E1LE12|E1LE12	tr|E1LE12|E1LE12_9FIRM	tr|E1LE12|E1LE12_9FIRM 50S ribosomal protein L16 OS=Veillonella atypica ACS-134-V-Col7a OX=866778 GN=rplP PE=3 SV=1	6	932210000	136150000	11	11	3	9	6	9	6	3	0	66.9	66.9	15.2	16.16	290.8	674	119	1107
153	E1LE30|E1LE30	tr|E1LE30|E1LE30_9FIRM	tr|E1LE30|E1LE30_9FIRM Protein translocase subunit SecD OS=Veillonella atypica ACS-134-V-Col7a OX=866778 GN=secD PE=3 SV=1	25	721170000	112840000	16	6	6	16	9	6	0	6	0	34.2	17.9	17.9	45.237	68.736	363	114	687
154	D1BN50|D1BN50	tr|D1BN50|D1BN50_VEIPT	tr|D1BN50|D1BN50_VEIPT Aspartokinase OS=Veillonella parvula (strain ATCC 10790 / DSM 2008 / CCUG 5123 / JCM 12972 / NCTC 11810 / Te3) OX=479436 GN=Vpar_1126 PE=3 SV=1	27	1225800	125030000	19	19	8	2	18	2	18	0	8	44.5	44.5	19.3	43.821	126.83	2	106	136
155	E1LDT8|E1LDT8	tr|E1LDT8|E1LDT8_9FIRM	tr|E1LDT8|E1LDT8_9FIRM ATP synthase subunit alpha OS=Veillonella atypica ACS-134-V-Col7a OX=866778 GN=atpA PE=3 SV=1	27	37146000	148670000	15	3	3	9	12	3	0	3	0	30.9	7.4	7.4	55.22	7.1135	18	122	177
156	D1BMD1|D1BMD1	tr|D1BMD1|D1BMD1_VEIPT	tr|D1BMD1|D1BMD1_VEIPT Elongation factor Ts OS=Veillonella parvula (strain ATCC 10790 / DSM 2008 / CCUG 5123 / JCM 12972 / NCTC 11810 / Te3) OX=479436 GN=tsf PE=3 SV=1	18	84857000	458340000	16	16	6	10	16	10	16	0	6	73.5	73.5	26.5	24.803	155.82	25	142	296
157	E1LA77|E1LA77;D1BPG4|D1BPG4	tr|E1LA77|E1LA77_9FIRM;tr|D1BPG4|D1BPG4_VEIPT	tr|E1LA77|E1LA77_9FIRM Malate/L-lactate dehydrogenase OS=Veillonella atypica ACS-134-V-Col7a OX=866778 GN=HMPREF9684_1347 PE=4 SV=1;tr|D1BPG4|D1BPG4_VEIPT Malate/L-lactate dehydrogenase OS=Veillonella parvula (strain ATCC 10790 / DSM 2008 / CCUG 5123 / JCM	24	494570000	258680000	21	21	21	18	19	18	19	18	19	67.8	67.8	67.8	41.023	323.31	220	215	509
158	D1BNS2|D1BNS2	tr|D1BNS2|D1BNS2_VEIPT	tr|D1BNS2|D1BNS2_VEIPT Periplasmic binding protein OS=Veillonella parvula (strain ATCC 10790 / DSM 2008 / CCUG 5123 / JCM 12972 / NCTC 11810 / Te3) OX=479436 GN=Vpar_1351 PE=1 SV=1	24	16446000	170340000	17	17	13	4	15	4	15	1	12	46.7	46.7	35.6	37.185	94.669	18	91	261
159	D1BN10|D1BN10	tr|D1BN10|D1BN10_VEIPT	tr|D1BN10|D1BN10_VEIPT Enolase OS=Veillonella parvula (strain ATCC 10790 / DSM 2008 / CCUG 5123 / JCM 12972 / NCTC 11810 / Te3) OX=479436 GN=eno PE=3 SV=1	23	6528500	92262000	12	12	8	5	9	5	9	2	5	30.2	30.2	20.8	45.845	47.024	22	29	64
160	D1BP56|D1BP56	tr|D1BP56|D1BP56_VEIPT	tr|D1BP56|D1BP56_VEIPT 50S ribosomal protein L16 OS=Veillonella parvula (strain ATCC 10790 / DSM 2008 / CCUG 5123 / JCM 12972 / NCTC 11810 / Te3) OX=479436 GN=rplP PE=3 SV=1	5	430930000	294210000	9	1	1	6	7	0	1	0	1	61.4	9.7	9.7	16.162	45.6	389	179	1001
161	D1BNI3|D1BNI3;E1LBV1|E1LBV1	tr|D1BNI3|D1BNI3_VEIPT;tr|E1LBV1|E1LBV1_9FIRM	tr|D1BNI3|D1BNI3_VEIPT Putative signal transduction protein with CBS domains OS=Veillonella parvula (strain ATCC 10790 / DSM 2008 / CCUG 5123 / JCM 12972 / NCTC 11810 / Te3) OX=479436 GN=Vpar_1260 PE=4 SV=1;tr|E1LBV1|E1LBV1_9FIRM CBS domain protein OS=Veil	10	71928000	649570000	10	10	10	7	10	7	10	7	10	70.9	70.9	70.9	17.002	114.47	7	212	274
162	D1BNJ3|D1BNJ3	tr|D1BNJ3|D1BNJ3_VEIPT	tr|D1BNJ3|D1BNJ3_VEIPT Carbamoyltransferase YgeW OS=Veillonella parvula (strain ATCC 10790 / DSM 2008 / CCUG 5123 / JCM 12972 / NCTC 11810 / Te3) OX=479436 GN=Vpar_1270 PE=3 SV=1	25	41143000	19111000	11	11	11	1	11	1	11	1	11	28.2	28.2	28.2	44.538	79.95	0	38	45
163	E1L9M0|E1L9M0	tr|E1L9M0|E1L9M0_9FIRM	tr|E1L9M0|E1L9M0_9FIRM Elongation factor Ts OS=Veillonella atypica ACS-134-V-Col7a OX=866778 GN=tsf PE=3 SV=1	18	96565000	235210000	14	4	4	14	10	4	0	4	0	65	18.1	18.1	24.778	7.1426	37	93	218
164	D1BLS3|D1BLS3	tr|D1BLS3|D1BLS3_VEIPT	tr|D1BLS3|D1BLS3_VEIPT Uncharacterized protein OS=Veillonella parvula (strain ATCC 10790 / DSM 2008 / CCUG 5123 / JCM 12972 / NCTC 11810 / Te3) OX=479436 GN=Vpar_0647 PE=4 SV=1	33	18831000	234160000	27	25	25	7	25	5	23	5	23	61.3	57.3	57.3	58.676	278.27	103	292	875
165	D1BQ58|D1BQ58	tr|D1BQ58|D1BQ58_VEIPT	tr|D1BQ58|D1BQ58_VEIPT Uncharacterized protein OS=Veillonella parvula (strain ATCC 10790 / DSM 2008 / CCUG 5123 / JCM 12972 / NCTC 11810 / Te3) OX=479436 GN=Vpar_1841 PE=4 SV=1	8	768380000	642890000	7	7	3	5	7	5	7	1	3	46.4	46.4	24	13.618	33.05	176	335	768
166	E1LDZ8|E1LDZ8;D1BP42|D1BP42	tr|E1LDZ8|E1LDZ8_9FIRM;tr|D1BP42|D1BP42_VEIPT	tr|E1LDZ8|E1LDZ8_9FIRM Adenylate kinase OS=Veillonella atypica ACS-134-V-Col7a OX=866778 GN=adk PE=3 SV=1;tr|D1BP42|D1BP42_VEIPT Adenylate kinase OS=Veillonella parvula (strain ATCC 10790 / DSM 2008 / CCUG 5123 / JCM 12972 / NCTC 11810 / Te3) OX=479436 GN=	13	6372200	278350000	8	8	8	2	8	2	8	2	8	48.1	48.1	48.1	20.495	76.556	1	207	213
167	D1BPY4|D1BPY4	tr|D1BPY4|D1BPY4_VEIPT	tr|D1BPY4|D1BPY4_VEIPT Uncharacterized protein OS=Veillonella parvula (strain ATCC 10790 / DSM 2008 / CCUG 5123 / JCM 12972 / NCTC 11810 / Te3) OX=479436 GN=Vpar_1765 PE=4 SV=1	16	33365000	143000000	10	8	4	5	9	3	7	1	3	44.1	38.1	23.7	34.04	161.6	9	58	146
168	D1BNK2|D1BNK2	tr|D1BNK2|D1BNK2_VEIPT	tr|D1BNK2|D1BNK2_VEIPT Large-conductance mechanosensitive channel OS=Veillonella parvula (strain ATCC 10790 / DSM 2008 / CCUG 5123 / JCM 12972 / NCTC 11810 / Te3) OX=479436 GN=mscL PE=3 SV=1	7	428630	366930000	5	5	5	1	5	1	5	1	5	29.7	29.7	29.7	16.658	18.51	0	47	128
169	E1LEF9|E1LEF9	tr|E1LEF9|E1LEF9_9FIRM	tr|E1LEF9|E1LEF9_9FIRM Hydrogenase, Fe-only OS=Veillonella atypica ACS-134-V-Col7a OX=866778 GN=HMPREF9684_0117 PE=4 SV=1	32	80140000	206160000	20	2	2	16	17	2	0	2	0	45.6	5.9	5.9	53.441	34.242	129	108	276
170	D1BLT9|D1BLT9	tr|D1BLT9|D1BLT9_VEIPT	tr|D1BLT9|D1BLT9_VEIPT Extracellular ligand-binding receptor OS=Veillonella parvula (strain ATCC 10790 / DSM 2008 / CCUG 5123 / JCM 12972 / NCTC 11810 / Te3) OX=479436 GN=Vpar_0663 PE=3 SV=1	20	639440000	528910000	20	11	11	12	19	3	11	3	11	70.2	41.4	41.4	40.65	323.31	1049	617	2598
171	E1LDE6|E1LDE6	tr|E1LDE6|E1LDE6_9FIRM	tr|E1LDE6|E1LDE6_9FIRM Glutamine ABC transporter periplasmic protein OS=Veillonella atypica ACS-134-V-Col7a OX=866778 GN=glnH PE=4 SV=1	16	1.0013e+09	291770000	14	8	8	13	10	8	4	8	4	65	33.5	33.5	28.142	151.24	530	60	673
172	E1LAY7|E1LAY7	tr|E1LAY7|E1LAY7_9FIRM	tr|E1LAY7|E1LAY7_9FIRM Elongation factor G OS=Veillonella atypica ACS-134-V-Col7a OX=866778 GN=HMPREF9684_1390 PE=3 SV=1	47	414220000	209490000	41	15	15	38	28	15	2	15	2	66.6	28.6	28.6	76.028	231.15	728	404	1223
173	E1LA54|E1LA54	tr|E1LA54|E1LA54_9FIRM	tr|E1LA54|E1LA54_9FIRM RND transporter, HAE1/HME family, permease protein OS=Veillonella atypica ACS-134-V-Col7a OX=866778 GN=HMPREF9684_0187 PE=4 SV=1	56	107670000	8361200	26	16	16	26	9	16	1	16	1	25.7	17.2	17.2	113.19	78.148	135	26	177
174	D1BP66|D1BP66	tr|D1BP66|D1BP66_VEIPT	tr|D1BP66|D1BP66_VEIPT Elongation factor G OS=Veillonella parvula (strain ATCC 10790 / DSM 2008 / CCUG 5123 / JCM 12972 / NCTC 11810 / Te3) OX=479436 GN=fusA PE=3 SV=1	42	17262000	159600000	33	33	10	15	31	15	31	1	9	61.2	61.2	22.9	76.422	323.31	6	286	368
175	E1LCT3|E1LCT3	tr|E1LCT3|E1LCT3_9FIRM	tr|E1LCT3|E1LCT3_9FIRM UTP--glucose-1-phosphate uridylyltransferase OS=Veillonella atypica ACS-134-V-Col7a OX=866778 GN=galU PE=3 SV=1	19	34450000	103120000	11	4	4	8	8	4	1	4	1	37.4	17.1	17.1	31.421	-2	7	14	31
176	E1LE22|E1LE22	tr|E1LE22|E1LE22_9FIRM	tr|E1LE22|E1LE22_9FIRM Elongation factor G OS=Veillonella atypica ACS-134-V-Col7a OX=866778 GN=fusA PE=3 SV=1	42	17822000	141220000	26	3	3	17	22	3	0	3	0	45.3	6.9	6.9	76.421	33.63	10	159	227
177	E1LEF5|E1LEF5	tr|E1LEF5|E1LEF5_9FIRM	tr|E1LEF5|E1LEF5_9FIRM Putative sugar-specific permease, SgaT/UlaA OS=Veillonella atypica ACS-134-V-Col7a OX=866778 GN=HMPREF9684_0113 PE=4 SV=1	10	350260000	82668000	3	1	1	3	2	1	0	1	0	11.6	2.9	2.9	47.675	18.767	26	14	52
178	E1LAH6|E1LAH6	tr|E1LAH6|E1LAH6_9FIRM	tr|E1LAH6|E1LAH6_9FIRM Fructose-1,6-bisphosphatase OS=Veillonella atypica ACS-134-V-Col7a OX=866778 GN=glpX PE=3 SV=1	19	391310000	152480000	19	19	10	19	9	19	9	10	0	53.8	53.8	24.4	34.183	139.91	504	85	622
179	E1LE51|E1LE51	tr|E1LE51|E1LE51_9FIRM	tr|E1LE51|E1LE51_9FIRM 30S ribosomal protein S16 OS=Veillonella atypica ACS-134-V-Col7a OX=866778 GN=rpsP PE=3 SV=1	6	29456000	376950000	6	6	1	4	6	4	6	0	1	56.3	56.3	8	9.6992	196.58	17	71	116
180	E1L9R2|E1L9R2	tr|E1L9R2|E1L9R2_9FIRM	tr|E1L9R2|E1L9R2_9FIRM Sporulation protein YtfJ OS=Veillonella atypica ACS-134-V-Col7a OX=866778 GN=HMPREF9684_1525 PE=4 SV=1	8	1223000000	308260000	7	3	3	7	4	3	0	3	0	53.6	25.6	25.6	13.668	11.824	347	163	624
181	E1LDM4|E1LDM4	tr|E1LDM4|E1LDM4_9FIRM	tr|E1LDM4|E1LDM4_9FIRM ABC transporter, substrate-binding protein OS=Veillonella atypica ACS-134-V-Col7a OX=866778 GN=HMPREF9684_1279 PE=3 SV=1	20	272500000	111680000	13	10	10	12	5	10	2	10	2	47.5	33.9	33.9	33.217	42.046	76	24	155
182	D1BLM2|D1BLM2	tr|D1BLM2|D1BLM2_VEIPT	tr|D1BLM2|D1BLM2_VEIPT Preprotein translocase, YajC subunit OS=Veillonella parvula (strain ATCC 10790 / DSM 2008 / CCUG 5123 / JCM 12972 / NCTC 11810 / Te3) OX=479436 GN=Vpar_0596 PE=3 SV=1	6	30562000	1315400000	5	5	5	2	5	2	5	2	5	45.8	45.8	45.8	10.989	83.378	4	127	280
183	E1L960|E1L960	tr|E1L960|E1L960_9FIRM	tr|E1L960|E1L960_9FIRM Aspartokinase OS=Veillonella atypica ACS-134-V-Col7a OX=866778 GN=HMPREF9684_0685 PE=3 SV=1	24	1379100	114320000	13	2	2	4	11	2	1	2	1	33	5.6	5.6	43.897	5.9468	5	56	77
184	D1BPT5|D1BPT5	tr|D1BPT5|D1BPT5_VEIPT	tr|D1BPT5|D1BPT5_VEIPT Phosphate acetyltransferase OS=Veillonella parvula (strain ATCC 10790 / DSM 2008 / CCUG 5123 / JCM 12972 / NCTC 11810 / Te3) OX=479436 GN=Vpar_1716 PE=3 SV=1	22	132380000	464270000	23	23	3	15	23	15	23	1	3	72.6	72.6	17.8	35.192	210.04	68	210	448
185	D1BP84|D1BP84	tr|D1BP84|D1BP84_VEIPT	tr|D1BP84|D1BP84_VEIPT Uncharacterized protein OS=Veillonella parvula (strain ATCC 10790 / DSM 2008 / CCUG 5123 / JCM 12972 / NCTC 11810 / Te3) OX=479436 GN=Vpar_1515 PE=4 SV=1	11	196410000	151950000	8	8	6	5	7	5	7	3	5	55.8	55.8	40.3	17.589	211.15	52	90	271
186	E1LCA2|E1LCA2	tr|E1LCA2|E1LCA2_9FIRM	tr|E1LCA2|E1LCA2_9FIRM Receptor family ligand-binding protein OS=Veillonella atypica ACS-134-V-Col7a OX=866778 GN=HMPREF9684_1713 PE=3 SV=1	20	888480000	391170000	24	24	15	24	14	24	14	15	6	76.2	76.2	47.4	40.873	323.31	1708	408	2622
187	E1LCZ7|E1LCZ7	tr|E1LCZ7|E1LCZ7_9FIRM	tr|E1LCZ7|E1LCZ7_9FIRM Phosphate acetyltransferase OS=Veillonella atypica ACS-134-V-Col7a OX=866778 GN=pta PE=3 SV=1	22	136290000	435150000	22	2	2	16	21	2	1	2	1	66.6	11.7	11.7	35.191	34.657	81	155	378
188	E1LAP7|E1LAP7	tr|E1LAP7|E1LAP7_9FIRM	tr|E1LAP7|E1LAP7_9FIRM DNA topoisomerase 1 OS=Veillonella atypica ACS-134-V-Col7a OX=866778 GN=topA PE=3 SV=1	52	2355800	50241000	12	5	5	8	5	5	0	5	0	13.3	6.5	6.5	87.139	6.8183	11	7	22
189	D1BQM4|D1BQM4	tr|D1BQM4|D1BQM4_VEIPT	tr|D1BQM4|D1BQM4_VEIPT Elongation factor G OS=Veillonella parvula (strain ATCC 10790 / DSM 2008 / CCUG 5123 / JCM 12972 / NCTC 11810 / Te3) OX=479436 GN=Vpar_0149 PE=3 SV=1	48	256240000	340670000	45	45	19	25	45	25	45	2	19	72.2	72.2	34.3	75.827	323.31	544	600	1281
190	E1L9B5|E1L9B5	tr|E1L9B5|E1L9B5_9FIRM	tr|E1L9B5|E1L9B5_9FIRM Glyceraldehyde-3-phosphate dehydrogenase OS=Veillonella atypica ACS-134-V-Col7a OX=866778 GN=gap PE=3 SV=1	21	139740000	109150000	19	2	2	14	14	2	0	2	0	69.3	7.7	7.7	36.53	94.854	74	65	275
191	D1BP20|D1BP20	tr|D1BP20|D1BP20_VEIPT	tr|D1BP20|D1BP20_VEIPT 50S ribosomal protein L13 OS=Veillonella parvula (strain ATCC 10790 / DSM 2008 / CCUG 5123 / JCM 12972 / NCTC 11810 / Te3) OX=479436 GN=rplM PE=3 SV=1	10	516060000	368060000	8	8	1	5	8	5	8	0	1	54.8	54.8	8.2	16.543	43.947	48	64	141
192	D1BQB7|D1BQB7;E1L918|E1L918	tr|D1BQB7|D1BQB7_VEIPT	tr|D1BQB7|D1BQB7_VEIPT S-layer domain protein OS=Veillonella parvula (strain ATCC 10790 / DSM 2008 / CCUG 5123 / JCM 12972 / NCTC 11810 / Te3) OX=479436 GN=Vpar_0041 PE=3 SV=1	41	2517300	265300000	39	39	38	5	32	5	32	5	32	58.1	58.1	58.1	82.761	323.31	1	261	513
193	E1L9D1|E1L9D1	tr|E1L9D1|E1L9D1_9FIRM	tr|E1L9D1|E1L9D1_9FIRM Uncharacterized protein OS=Veillonella atypica ACS-134-V-Col7a OX=866778 GN=HMPREF9684_0664 PE=4 SV=1	14	894450000	148010000	8	6	6	8	4	6	2	6	2	44.7	37.4	37.4	20.499	138.88	552	33	599
194	D1BP71|D1BP71	tr|D1BP71|D1BP71_VEIPT	tr|D1BP71|D1BP71_VEIPT DNA-directed RNA polymerase subunit beta OS=Veillonella parvula (strain ATCC 10790 / DSM 2008 / CCUG 5123 / JCM 12972 / NCTC 11810 / Te3) OX=479436 GN=rpoC PE=3 SV=1	96	166110000	99006000	75	75	21	52	70	52	70	1	19	54.7	54.7	19	156.39	323.31	671	431	1480
195	E1LAM3|E1LAM3	tr|E1LAM3|E1LAM3_9FIRM	tr|E1LAM3|E1LAM3_9FIRM 50S ribosomal protein L7/L12 OS=Veillonella atypica ACS-134-V-Col7a OX=866778 GN=rplL PE=3 SV=1	9	787980000	254170000	7	2	2	7	5	2	0	2	0	62.3	20.5	20.5	12.263	17.319	246	118	458
196	E1LDY6|E1LDY6	tr|E1LDY6|E1LDY6_9FIRM	tr|E1LDY6|E1LDY6_9FIRM 2-oxoacid:acceptor oxidoreductase, alpha subunit OS=Veillonella atypica ACS-134-V-Col7a OX=866778 GN=HMPREF9684_0944 PE=4 SV=1	30	121060000	108170000	25	5	5	21	17	5	0	5	0	48.5	9.9	9.9	63.901	14.125	88	112	378
197	D1BPL9|D1BPL9	tr|D1BPL9|D1BPL9_VEIPT	tr|D1BPL9|D1BPL9_VEIPT LUD_dom domain-containing protein OS=Veillonella parvula (strain ATCC 10790 / DSM 2008 / CCUG 5123 / JCM 12972 / NCTC 11810 / Te3) OX=479436 GN=Vpar_1650 PE=4 SV=1	13	29975000	367390000	11	11	7	4	11	4	11	0	7	55	55	37.6	26.911	208.55	59	202	289
198	E1LE26|E1LE26	tr|E1LE26|E1LE26_9FIRM	tr|E1LE26|E1LE26_9FIRM DNA-directed RNA polymerase subunit beta OS=Veillonella atypica ACS-134-V-Col7a OX=866778 GN=rpoC PE=3 SV=1	96	203890000	81470000	75	21	21	72	53	21	2	21	2	53	17.3	17.3	156.78	323.31	813	377	1511
199	D1BN60|D1BN60	tr|D1BN60|D1BN60_VEIPT	tr|D1BN60|D1BN60_VEIPT Periplasmic binding protein OS=Veillonella parvula (strain ATCC 10790 / DSM 2008 / CCUG 5123 / JCM 12972 / NCTC 11810 / Te3) OX=479436 GN=Vpar_1136 PE=4 SV=1	20	113630000	229320000	12	12	7	7	10	7	10	2	5	59.7	59.7	33.2	33.931	323.31	53	147	333
200	D1BP73|D1BP73	tr|D1BP73|D1BP73_VEIPT	tr|D1BP73|D1BP73_VEIPT Fumarate lyase OS=Veillonella parvula (strain ATCC 10790 / DSM 2008 / CCUG 5123 / JCM 12972 / NCTC 11810 / Te3) OX=479436 GN=Vpar_1504 PE=4 SV=1	25	122800000	179700000	21	21	6	15	20	15	20	1	6	42.7	42.7	15.3	51.309	164.29	140	236	442
201	D1BQE1|D1BQE1	tr|D1BQE1|D1BQE1_VEIPT	tr|D1BQE1|D1BQE1_VEIPT TonB-dependent receptor plug OS=Veillonella parvula (strain ATCC 10790 / DSM 2008 / CCUG 5123 / JCM 12972 / NCTC 11810 / Te3) OX=479436 GN=Vpar_0065 PE=3 SV=1	38	54100000	139360000	35	35	29	9	35	9	35	4	29	54.7	54.7	45.3	72.873	221.71	201	433	708
202	E1L970|E1L970	tr|E1L970|E1L970_9FIRM	tr|E1L970|E1L970_9FIRM High-affinity heme uptake system protein IsdE OS=Veillonella atypica ACS-134-V-Col7a OX=866778 GN=isdE PE=4 SV=1	20	287800000	113440000	10	5	5	10	6	5	1	5	1	50.2	23.6	23.6	33.931	181.91	238	44	512
203	D1BNS6|D1BNS6	tr|D1BNS6|D1BNS6_VEIPT	tr|D1BNS6|D1BNS6_VEIPT Hydrogenase, Fe-only OS=Veillonella parvula (strain ATCC 10790 / DSM 2008 / CCUG 5123 / JCM 12972 / NCTC 11810 / Te3) OX=479436 GN=Vpar_1355 PE=4 SV=1	32	66565000	238020000	24	24	6	17	22	17	22	3	5	56.9	56.9	17.2	53.404	259.36	110	192	378
204	D1BL58|D1BL58	tr|D1BL58|D1BL58_VEIPT	tr|D1BL58|D1BL58_VEIPT Uncharacterized protein OS=Veillonella parvula (strain ATCC 10790 / DSM 2008 / CCUG 5123 / JCM 12972 / NCTC 11810 / Te3) OX=479436 GN=Vpar_0431 PE=4 SV=1	12	127410000	110440000	10	10	8	4	9	4	9	2	7	62	62	52	20.62	161.66	4	122	301
205	E1LDD6|E1LDD6	tr|E1LDD6|E1LDD6_9FIRM	tr|E1LDD6|E1LDD6_9FIRM 50S ribosomal protein L13 OS=Veillonella atypica ACS-134-V-Col7a OX=866778 GN=rplM PE=3 SV=1	10	568570000	312850000	8	1	1	6	8	1	1	1	1	54.8	8.2	8.2	16.527	17.657	60	55	137
206	D1BQF3|D1BQF3	tr|D1BQF3|D1BQF3_VEIPT	tr|D1BQF3|D1BQF3_VEIPT FAD dependent oxidoreductase OS=Veillonella parvula (strain ATCC 10790 / DSM 2008 / CCUG 5123 / JCM 12972 / NCTC 11810 / Te3) OX=479436 GN=Vpar_0077 PE=3 SV=1	26	91642000	168390000	17	17	10	7	17	7	17	2	10	39.3	39.3	26.2	47.81	71.433	18	171	218
207	D1BNB9|D1BNB9	tr|D1BNB9|D1BNB9_VEIPT	tr|D1BNB9|D1BNB9_VEIPT DNA primase OS=Veillonella parvula (strain ATCC 10790 / DSM 2008 / CCUG 5123 / JCM 12972 / NCTC 11810 / Te3) OX=479436 GN=dnaG PE=3 SV=1	38	7250400	48015000	23	23	16	4	19	4	19	1	15	43.1	43.1	30.5	67.345	130.05	3	54	115
208	D1BMS7|D1BMS7	tr|D1BMS7|D1BMS7_VEIPT	tr|D1BMS7|D1BMS7_VEIPT Efflux transporter, RND family, MFP subunit OS=Veillonella parvula (strain ATCC 10790 / DSM 2008 / CCUG 5123 / JCM 12972 / NCTC 11810 / Te3) OX=479436 GN=Vpar_1003 PE=3 SV=1	19	12593000	400550000	16	15	15	3	15	2	14	2	14	57.1	54.9	54.9	40.477	323.31	48	110	349
209	D1BNA4|D1BNA4	tr|D1BNA4|D1BNA4_VEIPT	tr|D1BNA4|D1BNA4_VEIPT Alanine--tRNA ligase OS=Veillonella parvula (strain ATCC 10790 / DSM 2008 / CCUG 5123 / JCM 12972 / NCTC 11810 / Te3) OX=479436 GN=alaS PE=3 SV=1	53	12266000	69553000	32	32	14	15	32	15	32	2	14	41.2	41.2	14.7	95.068	323.31	37	118	211
210	E1LE14|E1LE14;D1BP58|D1BP58	tr|E1LE14|E1LE14_9FIRM;tr|D1BP58|D1BP58_VEIPT	tr|E1LE14|E1LE14_9FIRM 50S ribosomal protein L22 OS=Veillonella atypica ACS-134-V-Col7a OX=866778 GN=rplV PE=3 SV=1;tr|D1BP58|D1BP58_VEIPT 50S ribosomal protein L22 OS=Veillonella parvula (strain ATCC 10790 / DSM 2008 / CCUG 5123 / JCM 12972 / NCTC 11810 /	4	2240100000	446720000	6	6	6	4	4	4	4	4	4	59.5	59.5	59.5	12.486	26.398	76	43	294
211	D1BP61|D1BP61	tr|D1BP61|D1BP61_VEIPT	tr|D1BP61|D1BP61_VEIPT 50S ribosomal protein L23 OS=Veillonella parvula (strain ATCC 10790 / DSM 2008 / CCUG 5123 / JCM 12972 / NCTC 11810 / Te3) OX=479436 GN=rplW PE=3 SV=1	6	622850000	324980000	6	6	1	6	6	6	6	1	1	39.4	39.4	9.6	10.754	25.875	108	52	187
212	D1BP00|D1BP00;E1LBI1|E1LBI1	tr|D1BP00|D1BP00_VEIPT	tr|D1BP00|D1BP00_VEIPT Cell division protein SepF OS=Veillonella parvula (strain ATCC 10790 / DSM 2008 / CCUG 5123 / JCM 12972 / NCTC 11810 / Te3) OX=479436 GN=sepF PE=3 SV=1	7	15595000	136570000	9	9	9	1	9	1	9	1	9	50.3	50.3	50.3	18.743	83.226	3	60	64
213	D1BND3|D1BND3;E1LC02|E1LC02	tr|D1BND3|D1BND3_VEIPT;tr|E1LC02|E1LC02_9FIRM	tr|D1BND3|D1BND3_VEIPT Ferric uptake regulator, Fur family OS=Veillonella parvula (strain ATCC 10790 / DSM 2008 / CCUG 5123 / JCM 12972 / NCTC 11810 / Te3) OX=479436 GN=Vpar_1210 PE=3 SV=1;tr|E1LC02|E1LC02_9FIRM Transcriptional regulator, Fur family OS=Vei	9	30593000	280320000	8	8	8	6	8	6	8	6	8	51.9	51.9	51.9	19.032	129.33	3	52	73
214	D1BLW9|D1BLW9	tr|D1BLW9|D1BLW9_VEIPT	tr|D1BLW9|D1BLW9_VEIPT 50S ribosomal protein L32 OS=Veillonella parvula (strain ATCC 10790 / DSM 2008 / CCUG 5123 / JCM 12972 / NCTC 11810 / Te3) OX=479436 GN=rpmF PE=3 SV=1	3	147380000	298240000	2	2	1	1	2	1	2	0	1	43.1	43.1	27.6	6.6878	16.42	10	41	73
215	D1BQP7|D1BQP7	tr|D1BQP7|D1BQP7_VEIPT	tr|D1BQP7|D1BQP7_VEIPT Radical SAM domain protein OS=Veillonella parvula (strain ATCC 10790 / DSM 2008 / CCUG 5123 / JCM 12972 / NCTC 11810 / Te3) OX=479436 GN=Vpar_0172 PE=4 SV=1	30	5765800	215180000	23	23	23	6	23	6	23	6	23	55.3	55.3	55.3	46.3	211.55	2	286	288
216	E1LC13|E1LC13	tr|E1LC13|E1LC13_9FIRM	tr|E1LC13|E1LC13_9FIRM Protein RecA OS=Veillonella atypica ACS-134-V-Col7a OX=866778 GN=recA PE=3 SV=1	21	140380000	113090000	17	7	7	16	12	7	2	7	2	62.5	31.7	31.7	37.326	155.28	158	61	255
217	D1BP75|D1BP75	tr|D1BP75|D1BP75_VEIPT	tr|D1BP75|D1BP75_VEIPT 50S ribosomal protein L7/L12 OS=Veillonella parvula (strain ATCC 10790 / DSM 2008 / CCUG 5123 / JCM 12972 / NCTC 11810 / Te3) OX=479436 GN=rplL PE=3 SV=1	9	786800000	259530000	8	8	3	7	8	7	8	2	3	85.2	85.2	43.4	12.233	79.793	196	131	488
218	E1L946|E1L946	tr|E1L946|E1L946_9FIRM	tr|E1L946|E1L946_9FIRM Phosphoenolpyruvate synthase OS=Veillonella atypica ACS-134-V-Col7a OX=866778 GN=ppsA PE=3 SV=1	47	3952900	23332000	21	4	4	8	17	4	0	4	0	25.5	4.4	4.4	88.362	3.8327	13	63	83
219	D1BND5|D1BND5	tr|D1BND5|D1BND5_VEIPT	tr|D1BND5|D1BND5_VEIPT GTP diphosphokinase OS=Veillonella parvula (strain ATCC 10790 / DSM 2008 / CCUG 5123 / JCM 12972 / NCTC 11810 / Te3) OX=479436 GN=Vpar_1212 PE=3 SV=1	50	11731000	99747000	33	33	15	9	26	9	26	0	11	45.4	45.4	20.6	85.144	227.43	29	159	321
220	D1BPZ2|D1BPZ2	tr|D1BPZ2|D1BPZ2_VEIPT	tr|D1BPZ2|D1BPZ2_VEIPT Glycoside hydrolase family 3 domain protein OS=Veillonella parvula (strain ATCC 10790 / DSM 2008 / CCUG 5123 / JCM 12972 / NCTC 11810 / Te3) OX=479436 GN=Vpar_1773 PE=4 SV=1	23	41049000	71790000	9	5	5	4	4	1	3	1	3	22.6	14.7	14.7	41.707	7.8925	22	4	38
221	E1LD37|E1LD37	tr|E1LD37|E1LD37_9FIRM	tr|E1LD37|E1LD37_9FIRM Uncharacterized protein OS=Veillonella atypica ACS-134-V-Col7a OX=866778 GN=HMPREF9684_0371 PE=4 SV=1	19	969250000	58103000	16	10	10	16	7	10	1	10	1	72.3	56.8	56.8	33.035	323.31	449	25	570
222	E1LAM2|E1LAM2	tr|E1LAM2|E1LAM2_9FIRM	tr|E1LAM2|E1LAM2_9FIRM 50S ribosomal protein L10 OS=Veillonella atypica ACS-134-V-Col7a OX=866778 GN=rplJ PE=3 SV=1	14	697200000	290830000	10	2	2	8	8	2	0	2	0	57.7	10.7	10.7	17.721	5.5861	68	69	198
223	E1LE17|E1LE17	tr|E1LE17|E1LE17_9FIRM	tr|E1LE17|E1LE17_9FIRM 50S ribosomal protein L23 OS=Veillonella atypica ACS-134-V-Col7a OX=866778 GN=rplW PE=3 SV=1	6	622380000	313980000	6	1	1	6	5	1	0	1	0	36.2	6.4	6.4	10.746	-2	109	51	184
224	D1BNC2|D1BNC2	tr|D1BNC2|D1BNC2_VEIPT	tr|D1BNC2|D1BNC2_VEIPT Protein RecA OS=Veillonella parvula (strain ATCC 10790 / DSM 2008 / CCUG 5123 / JCM 12972 / NCTC 11810 / Te3) OX=479436 GN=recA PE=3 SV=1	21	103350000	153480000	17	17	7	10	17	10	17	1	7	62.7	62.7	31.8	37.068	323.31	120	95	279
225	E1LDS0|E1LDS0	tr|E1LDS0|E1LDS0_9FIRM	tr|E1LDS0|E1LDS0_9FIRM Hep/Hag repeat protein (Fragment) OS=Veillonella atypica ACS-134-V-Col7a OX=866778 GN=HMPREF9684_0135 PE=4 SV=1	26	115540000	33005000	5	3	3	5	2	3	0	3	0	6	5	5	91.698	42.212	40	5	50
226	E1LC44|E1LC44;D1BN91|D1BN91	tr|E1LC44|E1LC44_9FIRM;tr|D1BN91|D1BN91_VEIPT	tr|E1LC44|E1LC44_9FIRM 50S ribosomal protein L35 OS=Veillonella atypica ACS-134-V-Col7a OX=866778 GN=rpmI PE=3 SV=1;tr|D1BN91|D1BN91_VEIPT 50S ribosomal protein L35 OS=Veillonella parvula (strain ATCC 10790 / DSM 2008 / CCUG 5123 / JCM 12972 / NCTC 11810 /	3	571840000	504340000	3	3	3	3	3	3	3	3	3	26.2	26.2	26.2	7.4178	9.466	266	169	696
227	E1LC24|E1LC24	tr|E1LC24|E1LC24_9FIRM	tr|E1LC24|E1LC24_9FIRM Uptake hydrogenase small subunit OS=Veillonella atypica ACS-134-V-Col7a OX=866778 GN=hoxK PE=3 SV=1	16	771560000	53888000	16	16	4	16	8	16	8	4	1	52.8	52.8	15.6	41.311	245.16	426	22	476
228	D1BPP5|D1BPP5	tr|D1BPP5|D1BPP5_VEIPT	tr|D1BPP5|D1BPP5_VEIPT Heavy metal translocating P-type ATPase OS=Veillonella parvula (strain ATCC 10790 / DSM 2008 / CCUG 5123 / JCM 12972 / NCTC 11810 / Te3) OX=479436 GN=Vpar_1676 PE=3 SV=1	29	176590000	150820000	21	21	7	14	18	14	18	0	6	34.1	34.1	13.3	76.072	163.62	118	112	286
229	D1BQQ7|D1BQQ7	tr|D1BQQ7|D1BQQ7_VEIPT	tr|D1BQQ7|D1BQQ7_VEIPT Histidine kinase OS=Veillonella parvula (strain ATCC 10790 / DSM 2008 / CCUG 5123 / JCM 12972 / NCTC 11810 / Te3) OX=479436 GN=Vpar_0182 PE=4 SV=1	41	741400	33884000	20	20	20	1	20	1	20	1	20	28.2	28.2	28.2	83.467	42.81	0	96	96
230	D1BM42|D1BM42	tr|D1BM42|D1BM42_VEIPT	tr|D1BM42|D1BM42_VEIPT 30S ribosomal protein S15 OS=Veillonella parvula (strain ATCC 10790 / DSM 2008 / CCUG 5123 / JCM 12972 / NCTC 11810 / Te3) OX=479436 GN=rpsO PE=3 SV=1	4	93288000	372600000	5	5	1	3	5	3	5	0	1	52.3	52.3	10.2	10.439	41.251	50	269	364
231	D1BM23|D1BM23	tr|D1BM23|D1BM23_VEIPT	tr|D1BM23|D1BM23_VEIPT Iron-sulfur cluster carrier protein OS=Veillonella parvula (strain ATCC 10790 / DSM 2008 / CCUG 5123 / JCM 12972 / NCTC 11810 / Te3) OX=479436 GN=Vpar_0749 PE=3 SV=1	15	37620000	116000000	8	8	3	5	8	5	8	1	3	32.9	32.9	12.3	29.771	51.516	29	72	114
232	E1LEG3|E1LEG3	tr|E1LEG3|E1LEG3_9FIRM	tr|E1LEG3|E1LEG3_9FIRM DNA-binding protein HU OS=Veillonella atypica ACS-134-V-Col7a OX=866778 GN=hup PE=3 SV=1	5	27764000	257890000	5	2	2	3	2	2	0	2	0	53.5	24.2	24.2	10.611	14.6	12	91	127
233	D1BLD2|D1BLD2	tr|D1BLD2|D1BLD2_VEIPT	tr|D1BLD2|D1BLD2_VEIPT Bifunctional ligase/repressor BirA OS=Veillonella parvula (strain ATCC 10790 / DSM 2008 / CCUG 5123 / JCM 12972 / NCTC 11810 / Te3) OX=479436 GN=birA PE=3 SV=1	22	25712000	115470000	11	11	7	4	11	4	11	1	7	39.8	39.8	25.9	36.48	67.232	7	87	119
234	D1BL37|D1BL37	tr|D1BL37|D1BL37_VEIPT	tr|D1BL37|D1BL37_VEIPT Lipoprotein OS=Veillonella parvula (strain ATCC 10790 / DSM 2008 / CCUG 5123 / JCM 12972 / NCTC 11810 / Te3) OX=479436 GN=Vpar_0410 PE=3 SV=1	15	84991000	196880000	13	13	8	4	12	4	12	1	8	65.8	65.8	43.8	29.387	323.31	27	139	309
235	D1BLF0|D1BLF0	tr|D1BLF0|D1BLF0_VEIPT	tr|D1BLF0|D1BLF0_VEIPT Mammalian cell entry related domain protein OS=Veillonella parvula (strain ATCC 10790 / DSM 2008 / CCUG 5123 / JCM 12972 / NCTC 11810 / Te3) OX=479436 GN=Vpar_0524 PE=4 SV=1	25	36506000	104950000	17	17	16	5	16	5	16	4	15	51.3	51.3	49.9	45.698	281.02	2	53	171
236	E1LCX1|E1LCX1	tr|E1LCX1|E1LCX1_9FIRM	tr|E1LCX1|E1LCX1_9FIRM Cadmium-exporting ATPase OS=Veillonella atypica ACS-134-V-Col7a OX=866778 GN=cadA PE=3 SV=1	29	195520000	133490000	20	6	6	20	13	6	1	6	1	32.9	12	12	76.331	103.85	174	69	274
237	D1BN98|D1BN98	tr|D1BN98|D1BN98_VEIPT	tr|D1BN98|D1BN98_VEIPT Peptidase U32 OS=Veillonella parvula (strain ATCC 10790 / DSM 2008 / CCUG 5123 / JCM 12972 / NCTC 11810 / Te3) OX=479436 GN=Vpar_1175 PE=4 SV=1	27	9253300	41171000	13	13	4	6	12	6	12	0	4	33.3	33.3	10.1	47.237	28.32	6	38	66
238	D1BR08|D1BR08	tr|D1BR08|D1BR08_VEIPT	tr|D1BR08|D1BR08_VEIPT Uncharacterized protein OS=Veillonella parvula (strain ATCC 10790 / DSM 2008 / CCUG 5123 / JCM 12972 / NCTC 11810 / Te3) OX=479436 GN=Vpar_0287 PE=4 SV=1	17	82222000	171000000	14	14	11	4	14	4	14	1	11	58.7	58.7	47.2	28.157	218.58	64	110	208
239	D1BQQ6|D1BQQ6	tr|D1BQQ6|D1BQQ6_VEIPT	tr|D1BQQ6|D1BQQ6_VEIPT GMP synthase [glutamine-hydrolyzing] OS=Veillonella parvula (strain ATCC 10790 / DSM 2008 / CCUG 5123 / JCM 12972 / NCTC 11810 / Te3) OX=479436 GN=guaA PE=3 SV=1	33	28636000	37611000	16	16	2	9	16	9	16	0	2	33.1	33.1	3.7	57.389	34.179	14	70	96
240	E1LC37|E1LC37	tr|E1LC37|E1LC37_9FIRM	tr|E1LC37|E1LC37_9FIRM Peptidase, U32 family OS=Veillonella atypica ACS-134-V-Col7a OX=866778 GN=HMPREF9684_0526 PE=4 SV=1	29	9954000	23472000	10	1	1	7	8	1	0	1	0	26.4	3.1	3.1	47.075	2.6067	8	18	37
241	D1BPM3|D1BPM3;E1LA31|E1LA31	tr|D1BPM3|D1BPM3_VEIPT	tr|D1BPM3|D1BPM3_VEIPT S-layer domain protein OS=Veillonella parvula (strain ATCC 10790 / DSM 2008 / CCUG 5123 / JCM 12972 / NCTC 11810 / Te3) OX=479436 GN=Vpar_1654 PE=4 SV=1	24	236050	229860000	17	17	17	1	17	1	17	1	17	56.6	56.6	56.6	51.137	323.31	0	227	235
242	D1BP48|D1BP48	tr|D1BP48|D1BP48_VEIPT	tr|D1BP48|D1BP48_VEIPT 50S ribosomal protein L6 OS=Veillonella parvula (strain ATCC 10790 / DSM 2008 / CCUG 5123 / JCM 12972 / NCTC 11810 / Te3) OX=479436 GN=rplF PE=3 SV=1	9	107330000	102240000	6	1	1	5	5	0	1	0	1	23.8	3.9	3.9	19.456	2.0014	8	22	32
243	D1BLN4|D1BLN4	tr|D1BLN4|D1BLN4_VEIPT	tr|D1BLN4|D1BLN4_VEIPT Ribose-phosphate pyrophosphokinase OS=Veillonella parvula (strain ATCC 10790 / DSM 2008 / CCUG 5123 / JCM 12972 / NCTC 11810 / Te3) OX=479436 GN=prs PE=3 SV=1	18	35553000	184680000	12	12	6	5	11	5	11	0	6	46.7	46.7	24.9	34.318	158.42	36	159	250
244	E1LAV0|E1LAV0	tr|E1LAV0|E1LAV0_9FIRM	tr|E1LAV0|E1LAV0_9FIRM Transcriptional repressor of CtsR OS=Veillonella atypica ACS-134-V-Col7a OX=866778 GN=HMPREF9684_0288 PE=4 SV=1	9	483340000	33730000	8	5	5	7	6	4	3	4	3	61	39	39	18.581	75.909	179	28	214
245	D1BMW8|D1BMW8	tr|D1BMW8|D1BMW8_VEIPT	tr|D1BMW8|D1BMW8_VEIPT Cell wall hydrolase/autolysin OS=Veillonella parvula (strain ATCC 10790 / DSM 2008 / CCUG 5123 / JCM 12972 / NCTC 11810 / Te3) OX=479436 GN=Vpar_1044 PE=4 SV=1	25	15221000	165890000	15	15	11	6	15	6	15	2	11	47.9	47.9	38.6	39.102	281.17	7	67	85
246	D1BM45|D1BM45	tr|D1BM45|D1BM45_VEIPT	tr|D1BM45|D1BM45_VEIPT Methyltransferase type 12 OS=Veillonella parvula (strain ATCC 10790 / DSM 2008 / CCUG 5123 / JCM 12972 / NCTC 11810 / Te3) OX=479436 GN=Vpar_0771 PE=4 SV=1	29	2055700	36091000	9	8	8	3	8	2	7	2	7	14.8	13.7	13.7	62.507	7.3749	2	13	19
247	E1L9D7|E1L9D7	tr|E1L9D7|E1L9D7_9FIRM	tr|E1L9D7|E1L9D7_9FIRM UDP-N-acetylmuramate--L-alanine ligase OS=Veillonella atypica ACS-134-V-Col7a OX=866778 GN=murC PE=3 SV=1	23	12633000	9937600	11	5	5	5	9	2	3	2	3	24.3	12.6	12.6	50.354	2.1301	5	57	90
248	D1BNG8|D1BNG8	tr|D1BNG8|D1BNG8_VEIPT	tr|D1BNG8|D1BNG8_VEIPT Methylmalonyl-CoA epimerase OS=Veillonella parvula (strain ATCC 10790 / DSM 2008 / CCUG 5123 / JCM 12972 / NCTC 11810 / Te3) OX=479436 GN=Vpar_1245 PE=3 SV=1	7	291600000	423190000	7	2	2	6	7	1	2	1	2	75	22.9	22.9	15.294	29.1	233	215	607
249	E1LE04|E1LE04	tr|E1LE04|E1LE04_9FIRM	tr|E1LE04|E1LE04_9FIRM 50S ribosomal protein L6 OS=Veillonella atypica ACS-134-V-Col7a OX=866778 GN=rplF PE=3 SV=1	9	127380000	67914000	7	7	2	7	4	7	4	2	0	32.6	32.6	12.7	19.378	24.841	21	20	43
250	E1LEA3|E1LEA3	tr|E1LEA3|E1LEA3_9FIRM	tr|E1LEA3|E1LEA3_9FIRM Outer membrane efflux protein OS=Veillonella atypica ACS-134-V-Col7a OX=866778 GN=HMPREF9684_1169 PE=3 SV=1	26	572200000	125320000	20	18	18	20	3	18	1	18	1	51.8	47.4	47.4	53.131	261.33	389	48	517
251	D1BND6|D1BND6	tr|D1BND6|D1BND6_VEIPT	tr|D1BND6|D1BND6_VEIPT Single-stranded-DNA-specific exonuclease RecJ OS=Veillonella parvula (strain ATCC 10790 / DSM 2008 / CCUG 5123 / JCM 12972 / NCTC 11810 / Te3) OX=479436 GN=Vpar_1213 PE=3 SV=1	41	1315700	3057000	9	9	9	1	6	1	6	1	6	12.9	12.9	12.9	73.865	8.033	2	6	13
252	D1BNB0|D1BNB0	tr|D1BNB0|D1BNB0_VEIPT	tr|D1BNB0|D1BNB0_VEIPT Nickel-dependent hydrogenase large subunit OS=Veillonella parvula (strain ATCC 10790 / DSM 2008 / CCUG 5123 / JCM 12972 / NCTC 11810 / Te3) OX=479436 GN=Vpar_1187 PE=3 SV=1	38	62306000	96217000	33	33	15	15	31	15	31	1	14	55.1	55.1	21.8	70.042	176.59	98	153	310
253	D1BPF1|D1BPF1	tr|D1BPF1|D1BPF1_VEIPT	tr|D1BPF1|D1BPF1_VEIPT Alkyl hydroperoxide reductase C OS=Veillonella parvula (strain ATCC 10790 / DSM 2008 / CCUG 5123 / JCM 12972 / NCTC 11810 / Te3) OX=479436 GN=Vpar_1582 PE=3 SV=1	14	7811100	118160000	9	9	4	4	9	4	9	0	4	48.7	48.7	23.5	20.999	17.249	4	30	38
254	D1BLF4|D1BLF4	tr|D1BLF4|D1BLF4_VEIPT	tr|D1BLF4|D1BLF4_VEIPT Outer membrane chaperone Skp (OmpH) OS=Veillonella parvula (strain ATCC 10790 / DSM 2008 / CCUG 5123 / JCM 12972 / NCTC 11810 / Te3) OX=479436 GN=Vpar_0528 PE=3 SV=1	9	49290	216310000	5	5	5	1	3	1	3	1	3	40.1	40.1	40.1	17.471	147.1	0	17	142
255	E1LA33|E1LA33	tr|E1LA33|E1LA33_9FIRM	tr|E1LA33|E1LA33_9FIRM Cysteine-rich domain protein OS=Veillonella atypica ACS-134-V-Col7a OX=866778 GN=HMPREF9684_1851 PE=4 SV=1	13	82919000	112990000	8	5	5	7	3	5	0	5	0	40	26.9	26.9	27.559	18.988	55	47	131
256	E1LC45|E1LC45	tr|E1LC45|E1LC45_9FIRM	tr|E1LC45|E1LC45_9FIRM 50S ribosomal protein L20 OS=Veillonella atypica ACS-134-V-Col7a OX=866778 GN=rplT PE=3 SV=1	10	1.8632e+09	181650000	11	11	1	10	6	10	6	1	0	65.5	65.5	6	13.117	50.862	430	62	772
257	D1BM81|D1BM81	tr|D1BM81|D1BM81_VEIPT	tr|D1BM81|D1BM81_VEIPT Cell division ATP-binding protein FtsE OS=Veillonella parvula (strain ATCC 10790 / DSM 2008 / CCUG 5123 / JCM 12972 / NCTC 11810 / Te3) OX=479436 GN=ftsE PE=3 SV=1	10	99151000	109560000	7	5	5	2	7	0	5	0	5	47.4	36.8	36.8	25.293	19.794	80	132	254
258	D1BNF4|D1BNF4	tr|D1BNF4|D1BNF4_VEIPT	tr|D1BNF4|D1BNF4_VEIPT Acetate kinase OS=Veillonella parvula (strain ATCC 10790 / DSM 2008 / CCUG 5123 / JCM 12972 / NCTC 11810 / Te3) OX=479436 GN=ackA PE=3 SV=1	22	9460000	143360000	16	16	8	5	15	5	15	0	8	45.6	45.6	21.9	43.934	99.323	29	135	172
259	D1BMH5|D1BMH5	tr|D1BMH5|D1BMH5_VEIPT	tr|D1BMH5|D1BMH5_VEIPT Protease HtpX homolog OS=Veillonella parvula (strain ATCC 10790 / DSM 2008 / CCUG 5123 / JCM 12972 / NCTC 11810 / Te3) OX=479436 GN=htpX PE=3 SV=1	14	8210900	61056000	9	9	9	2	9	2	9	2	9	39.9	39.9	39.9	31.613	206.41	5	78	199
260	D1BN90|D1BN90	tr|D1BN90|D1BN90_VEIPT	tr|D1BN90|D1BN90_VEIPT 50S ribosomal protein L20 OS=Veillonella parvula (strain ATCC 10790 / DSM 2008 / CCUG 5123 / JCM 12972 / NCTC 11810 / Te3) OX=479436 GN=rplT PE=3 SV=1	10	1.5014e+09	199440000	11	1	1	10	7	1	1	1	1	65.5	6	6	13.087	-2	345	66	733
261	E1LCG8|E1LCG8	tr|E1LCG8|E1LCG8_9FIRM	tr|E1LCG8|E1LCG8_9FIRM Ribose-phosphate pyrophosphokinase OS=Veillonella atypica ACS-134-V-Col7a OX=866778 GN=prs PE=3 SV=1	19	59983000	83115000	8	2	2	7	5	2	0	2	0	29.7	7.9	7.9	34.5	22.548	55	62	140
262	D1BQU7|D1BQU7	tr|D1BQU7|D1BQU7_VEIPT	tr|D1BQU7|D1BQU7_VEIPT Nitrate reductase, beta subunit OS=Veillonella parvula (strain ATCC 10790 / DSM 2008 / CCUG 5123 / JCM 12972 / NCTC 11810 / Te3) OX=479436 GN=Vpar_0223 PE=4 SV=1	32	52118000	53079000	18	18	9	10	16	10	16	2	9	42.6	42.6	23.3	54.79	77.211	69	94	209
263	D1BNZ4|D1BNZ4	tr|D1BNZ4|D1BNZ4_VEIPT	tr|D1BNZ4|D1BNZ4_VEIPT Uroporphyrinogen-III C-methyltransferase OS=Veillonella parvula (strain ATCC 10790 / DSM 2008 / CCUG 5123 / JCM 12972 / NCTC 11810 / Te3) OX=479436 GN=Vpar_1424 PE=4 SV=1	24	24706000	111640000	17	17	14	3	14	3	14	2	11	38	38	30.1	54.002	187.26	10	125	171
264	D1BME6|D1BME6	tr|D1BME6|D1BME6_VEIPT	tr|D1BME6|D1BME6_VEIPT DNA mismatch repair protein MutL OS=Veillonella parvula (strain ATCC 10790 / DSM 2008 / CCUG 5123 / JCM 12972 / NCTC 11810 / Te3) OX=479436 GN=mutL PE=3 SV=1	38	17129000	1960200	14	7	7	6	7	0	5	0	5	21.3	11.3	11.3	75.705	24.991	17	11	50
265	E1LC25|E1LC25	tr|E1LC25|E1LC25_9FIRM	tr|E1LC25|E1LC25_9FIRM Nickel-dependent hydrogenase OS=Veillonella atypica ACS-134-V-Col7a OX=866778 GN=HMPREF9684_0514 PE=3 SV=1	35	87620000	65302000	27	9	9	23	18	9	1	9	1	49.3	16	16	69.811	73.5	158	87	280
266	D1BQ83|D1BQ83;E1LBF9|E1LBF9	tr|D1BQ83|D1BQ83_VEIPT;tr|E1LBF9|E1LBF9_9FIRM	tr|D1BQ83|D1BQ83_VEIPT DNA gyrase subunit B OS=Veillonella parvula (strain ATCC 10790 / DSM 2008 / CCUG 5123 / JCM 12972 / NCTC 11810 / Te3) OX=479436 GN=gyrB PE=3 SV=1;tr|E1LBF9|E1LBF9_9FIRM DNA gyrase subunit B OS=Veillonella atypica ACS-134-V-Col7a OX=8	39	9540700	84198000	17	17	17	8	16	8	16	8	16	28.1	28.1	28.1	70.121	59.609	13	75	122
267	D1BQ47|D1BQ47	tr|D1BQ47|D1BQ47_VEIPT	tr|D1BQ47|D1BQ47_VEIPT Hydrogenase, Fe-only OS=Veillonella parvula (strain ATCC 10790 / DSM 2008 / CCUG 5123 / JCM 12972 / NCTC 11810 / Te3) OX=479436 GN=Vpar_1830 PE=4 SV=1	29	24041000	204190000	23	22	12	7	23	7	22	0	12	46.8	45.6	24.2	52.362	104.66	29	272	344
268	E1LCK6|E1LCK6	tr|E1LCK6|E1LCK6_9FIRM	tr|E1LCK6|E1LCK6_9FIRM Iron-sulfur cluster carrier protein OS=Veillonella atypica ACS-134-V-Col7a OX=866778 GN=HMPREF9684_1793 PE=3 SV=1	17	39988000	86193000	7	2	2	5	6	1	1	1	1	30	9.4	9.4	29.996	7.0981	35	61	107
269	E1LEG6|E1LEG6	tr|E1LEG6|E1LEG6_9FIRM	tr|E1LEG6|E1LEG6_9FIRM Transcription-repair-coupling factor OS=Veillonella atypica ACS-134-V-Col7a OX=866778 GN=mfd PE=3 SV=1	64	2915600	41791000	12	4	4	8	8	4	0	4	0	9.8	3.7	3.7	124.74	4.11	11	12	27
270	D1BND1|D1BND1	tr|D1BND1|D1BND1_VEIPT	tr|D1BND1|D1BND1_VEIPT Histidine--tRNA ligase OS=Veillonella parvula (strain ATCC 10790 / DSM 2008 / CCUG 5123 / JCM 12972 / NCTC 11810 / Te3) OX=479436 GN=hisS PE=3 SV=1	23	129030000	61398000	14	14	11	2	12	2	12	1	10	35.2	35.2	27.2	47.877	103.26	8	43	75
271	D1BR13|D1BR13	tr|D1BR13|D1BR13_VEIPT	tr|D1BR13|D1BR13_VEIPT Diadenylate cyclase OS=Veillonella parvula (strain ATCC 10790 / DSM 2008 / CCUG 5123 / JCM 12972 / NCTC 11810 / Te3) OX=479436 GN=dacA PE=3 SV=1	12	330590000	43434000	10	10	4	7	9	7	9	2	3	44.4	44.4	21.1	30.584	199.83	16	24	81
272	E1LCP9|E1LCP9	tr|E1LCP9|E1LCP9_9FIRM	tr|E1LCP9|E1LCP9_9FIRM Translation initiation factor IF-2 OS=Veillonella atypica ACS-134-V-Col7a OX=866778 GN=infB PE=3 SV=1	48	19625000	87703000	28	3	3	21	24	3	0	3	0	36.1	3.8	3.8	90.277	7.6521	43	217	407
273	D1BLI0|D1BLI0	tr|D1BLI0|D1BLI0_VEIPT	tr|D1BLI0|D1BLI0_VEIPT Signal peptidase I OS=Veillonella parvula (strain ATCC 10790 / DSM 2008 / CCUG 5123 / JCM 12972 / NCTC 11810 / Te3) OX=479436 GN=Vpar_0554 PE=3 SV=1	13	33634000	75928000	9	8	8	2	8	1	7	1	7	47.4	42.3	42.3	22.247	76.517	6	43	68
274	E1LA52|E1LA52;D1BR59|D1BR59	tr|E1LA52|E1LA52_9FIRM;tr|D1BR59|D1BR59_VEIPT	tr|E1LA52|E1LA52_9FIRM 30S ribosomal protein S18 OS=Veillonella atypica ACS-134-V-Col7a OX=866778 GN=rpsR PE=3 SV=1;tr|D1BR59|D1BR59_VEIPT 30S ribosomal protein S18 OS=Veillonella parvula (strain ATCC 10790 / DSM 2008 / CCUG 5123 / JCM 12972 / NCTC 11810 /	4	929460000	303530000	3	3	3	3	3	3	3	3	3	40.8	40.8	40.8	8.9225	32.672	89	33	223
275	E1LCE4|E1LCE4	tr|E1LCE4|E1LCE4_9FIRM	tr|E1LCE4|E1LCE4_9FIRM Chromosome partition protein Smc OS=Veillonella atypica ACS-134-V-Col7a OX=866778 GN=smc PE=3 SV=1	77	21590000	1418000	27	27	18	25	9	25	9	18	2	22.5	22.5	14.4	134.06	121.61	85	14	106
276	D1BMA5|D1BMA5	tr|D1BMA5|D1BMA5_VEIPT	tr|D1BMA5|D1BMA5_VEIPT 4-hydroxy-3-methylbut-2-enyl diphosphate reductase OS=Veillonella parvula (strain ATCC 10790 / DSM 2008 / CCUG 5123 / JCM 12972 / NCTC 11810 / Te3) OX=479436 GN=ispH PE=3 SV=1	49	124920000	109600000	36	36	11	24	31	24	31	2	11	53	53	18	69.988	323.31	182	198	641
277	E1LBP6|E1LBP6	tr|E1LBP6|E1LBP6_9FIRM	tr|E1LBP6|E1LBP6_9FIRM Chaperonin GroEL OS=Veillonella atypica ACS-134-V-Col7a OX=866778 GN=groL PE=3 SV=1	30	52924000	118460000	24	3	3	19	20	3	0	3	0	52.3	5	5	57.47	36.118	36	83	156
278	D1BND0|D1BND0	tr|D1BND0|D1BND0_VEIPT	tr|D1BND0|D1BND0_VEIPT Aspartate--tRNA(Asp/Asn) ligase OS=Veillonella parvula (strain ATCC 10790 / DSM 2008 / CCUG 5123 / JCM 12972 / NCTC 11810 / Te3) OX=479436 GN=aspS PE=3 SV=1	40	37551000	89283000	25	25	12	13	24	13	24	0	11	45.3	45.3	23	68.455	271.24	60	142	263
279	D1BM60|D1BM60	tr|D1BM60|D1BM60_VEIPT	tr|D1BM60|D1BM60_VEIPT Translation initiation factor IF-2 OS=Veillonella parvula (strain ATCC 10790 / DSM 2008 / CCUG 5123 / JCM 12972 / NCTC 11810 / Te3) OX=479436 GN=infB PE=3 SV=1	45	15253000	124390000	33	33	8	18	30	18	30	0	6	42.5	42.5	10.2	90.855	323.31	37	239	438
280	D1BMD2|D1BMD2	tr|D1BMD2|D1BMD2_VEIPT	tr|D1BMD2|D1BMD2_VEIPT Uridylate kinase OS=Veillonella parvula (strain ATCC 10790 / DSM 2008 / CCUG 5123 / JCM 12972 / NCTC 11810 / Te3) OX=479436 GN=pyrH PE=3 SV=1	15	36160000	289970000	11	11	6	4	10	4	10	0	5	59.3	59.3	34	26.17	280.09	28	73	175
281	E1LC05|E1LC05	tr|E1LC05|E1LC05_9FIRM	tr|E1LC05|E1LC05_9FIRM Aspartate--tRNA(Asp/Asn) ligase OS=Veillonella atypica ACS-134-V-Col7a OX=866778 GN=aspS PE=3 SV=1	40	66154000	64093000	22	9	9	22	13	9	0	9	0	39.5	17.2	17.2	68.458	28.228	86	85	216
282	D1BLY5|D1BLY5;E1LCE8|E1LCE8	tr|D1BLY5|D1BLY5_VEIPT;tr|E1LCE8|E1LCE8_9FIRM	tr|D1BLY5|D1BLY5_VEIPT UvrABC system protein A OS=Veillonella parvula (strain ATCC 10790 / DSM 2008 / CCUG 5123 / JCM 12972 / NCTC 11810 / Te3) OX=479436 GN=uvrA PE=3 SV=1;tr|E1LCE8|E1LCE8_9FIRM UvrABC system protein A OS=Veillonella atypica ACS-134-V-Col7	61	42869000	3476400	14	14	14	4	9	4	9	4	9	16.2	16.2	16.2	105.25	25.1	11	9	34
283	E1L9M7|E1L9M7	tr|E1L9M7|E1L9M7_9FIRM	tr|E1L9M7|E1L9M7_9FIRM 4-hydroxy-3-methylbut-2-en-1-yl diphosphate synthase (flavodoxin) OS=Veillonella atypica ACS-134-V-Col7a OX=866778 GN=ispG PE=3 SV=1	22	306190000	19349000	20	20	11	19	8	19	8	11	0	65.6	65.6	32.4	38.367	192.71	174	43	251
284	D1BMV8|D1BMV8	tr|D1BMV8|D1BMV8_VEIPT	tr|D1BMV8|D1BMV8_VEIPT Chaperonin GroEL OS=Veillonella parvula (strain ATCC 10790 / DSM 2008 / CCUG 5123 / JCM 12972 / NCTC 11810 / Te3) OX=479436 GN=groEL PE=3 SV=1	32	41949000	146120000	28	28	7	16	27	16	27	0	7	62.7	62.7	15.3	57.48	323.31	24	123	194
285	E1LBW6|E1LBW6	tr|E1LBW6|E1LBW6_9FIRM	tr|E1LBW6|E1LBW6_9FIRM Methylmalonyl-CoA epimerase OS=Veillonella atypica ACS-134-V-Col7a OX=866778 GN=mce PE=3 SV=1	7	312940000	402620000	7	7	2	7	5	7	5	2	0	75	75	22.9	15.279	323.31	364	126	613
286	D1BP36|D1BP36	tr|D1BP36|D1BP36_VEIPT	tr|D1BP36|D1BP36_VEIPT DNA-directed RNA polymerase subunit alpha OS=Veillonella parvula (strain ATCC 10790 / DSM 2008 / CCUG 5123 / JCM 12972 / NCTC 11810 / Te3) OX=479436 GN=rpoA PE=3 SV=1	19	72492000	282660000	18	18	4	11	18	11	18	1	4	54.8	54.8	13.2	36.404	278.86	47	221	469
287	D1BPM4|D1BPM4	tr|D1BPM4|D1BPM4_VEIPT	tr|D1BPM4|D1BPM4_VEIPT Uncharacterized protein OS=Veillonella parvula (strain ATCC 10790 / DSM 2008 / CCUG 5123 / JCM 12972 / NCTC 11810 / Te3) OX=479436 GN=Vpar_1655 PE=4 SV=1	15	15994000	204420000	11	11	8	3	11	3	11	1	8	40.2	40.2	29.9	31.249	265.84	4	32	40
288	D1BM83|D1BM83	tr|D1BM83|D1BM83_VEIPT	tr|D1BM83|D1BM83_VEIPT Peptidase M23 OS=Veillonella parvula (strain ATCC 10790 / DSM 2008 / CCUG 5123 / JCM 12972 / NCTC 11810 / Te3) OX=479436 GN=Vpar_0809 PE=4 SV=1	20	22372000	40222000	12	12	9	4	10	4	10	1	7	32.1	32.1	25.7	43.106	83.875	4	19	31
289	E1L9P5|E1L9P5	tr|E1L9P5|E1L9P5_9FIRM	tr|E1L9P5|E1L9P5_9FIRM Membrane protein insertase, YidC/Oxa1 family OS=Veillonella atypica ACS-134-V-Col7a OX=866778 GN=HMPREF9684_1508 PE=3 SV=1	7	193050000	283130000	4	2	2	3	1	2	0	2	0	19.3	11.5	11.5	24.891	79.137	84	9	101
290	D1BQ73|D1BQ73	tr|D1BQ73|D1BQ73_VEIPT	tr|D1BQ73|D1BQ73_VEIPT 60 kDa inner membrane insertion protein OS=Veillonella parvula (strain ATCC 10790 / DSM 2008 / CCUG 5123 / JCM 12972 / NCTC 11810 / Te3) OX=479436 GN=Vpar_1856 PE=3 SV=1	5	257710000	451480000	4	4	2	1	3	1	3	0	2	19	19	11.3	24.915	160.28	7	18	65
291	E1LAG6|E1LAG6	tr|E1LAG6|E1LAG6_9FIRM	tr|E1LAG6|E1LAG6_9FIRM Bifunctional ligase/repressor BirA OS=Veillonella atypica ACS-134-V-Col7a OX=866778 GN=birA PE=3 SV=1	21	26770000	19263000	6	2	2	5	4	2	0	2	0	19.8	5.9	5.9	36.492	-2	10	62	92
292	D1BPM1|D1BPM1	tr|D1BPM1|D1BPM1_VEIPT	tr|D1BPM1|D1BPM1_VEIPT Uncharacterized protein OS=Veillonella parvula (strain ATCC 10790 / DSM 2008 / CCUG 5123 / JCM 12972 / NCTC 11810 / Te3) OX=479436 GN=Vpar_1652 PE=4 SV=1	14	32705000	250660000	10	10	7	3	10	3	10	1	7	44.1	44.1	31	27.521	84.414	23	147	255
293	E1LB86|E1LB86	tr|E1LB86|E1LB86_9FIRM	tr|E1LB86|E1LB86_9FIRM Lipoprotein OS=Veillonella atypica ACS-134-V-Col7a OX=866778 GN=HMPREF9684_1458 PE=3 SV=1	14	106280000	50758000	11	5	5	9	4	5	0	5	0	53.5	28.9	28.9	29.355	109.18	108	37	168
294	D1BPA2|D1BPA2	tr|D1BPA2|D1BPA2_VEIPT	tr|D1BPA2|D1BPA2_VEIPT ATP synthase gamma chain OS=Veillonella parvula (strain ATCC 10790 / DSM 2008 / CCUG 5123 / JCM 12972 / NCTC 11810 / Te3) OX=479436 GN=atpG PE=3 SV=1	20	79234000	69848000	12	8	8	4	9	0	6	0	6	51.4	36.6	36.6	31.55	61.803	11	31	77
295	D1BM69|D1BM69	tr|D1BM69|D1BM69_VEIPT	tr|D1BM69|D1BM69_VEIPT Extracellular solute-binding protein family 3 OS=Veillonella parvula (strain ATCC 10790 / DSM 2008 / CCUG 5123 / JCM 12972 / NCTC 11810 / Te3) OX=479436 GN=Vpar_0795 PE=3 SV=1	15	162870000	147830000	12	12	8	5	11	5	11	1	7	52.6	52.6	35.8	29.284	149.48	23	55	152
296	D1BR30|D1BR30	tr|D1BR30|D1BR30_VEIPT	tr|D1BR30|D1BR30_VEIPT Molybdenum ABC transporter, periplasmic molybdate-binding protein OS=Veillonella parvula (strain ATCC 10790 / DSM 2008 / CCUG 5123 / JCM 12972 / NCTC 11810 / Te3) OX=479436 GN=Vpar_0309 PE=3 SV=1	16	13192000	250680000	13	13	8	5	13	5	13	2	8	71.8	71.8	50	28.11	323.31	6	130	325
297	D1BP76|D1BP76	tr|D1BP76|D1BP76_VEIPT	tr|D1BP76|D1BP76_VEIPT 50S ribosomal protein L10 OS=Veillonella parvula (strain ATCC 10790 / DSM 2008 / CCUG 5123 / JCM 12972 / NCTC 11810 / Te3) OX=479436 GN=rplJ PE=3 SV=1	14	523640000	355550000	11	11	3	7	11	7	11	1	3	73.3	73.3	25.5	17.42	154.89	90	111	288
298	E1LDZ2|E1LDZ2	tr|E1LDZ2|E1LDZ2_9FIRM	tr|E1LDZ2|E1LDZ2_9FIRM DNA-directed RNA polymerase subunit alpha OS=Veillonella atypica ACS-134-V-Col7a OX=866778 GN=rpoA PE=3 SV=1	19	80485000	226580000	15	1	1	11	14	1	0	1	0	44.3	2.4	2.4	36.423	-2	48	178	403
299	D1BPQ4|D1BPQ4	tr|D1BPQ4|D1BPQ4_VEIPT	tr|D1BPQ4|D1BPQ4_VEIPT Ribonuclease J OS=Veillonella parvula (strain ATCC 10790 / DSM 2008 / CCUG 5123 / JCM 12972 / NCTC 11810 / Te3) OX=479436 GN=rnj PE=3 SV=1	40	12282000	124400000	31	31	16	7	28	7	28	0	15	50	50	25.6	79.001	323.31	15	143	418
300	D1BPA1|D1BPA1	tr|D1BPA1|D1BPA1_VEIPT	tr|D1BPA1|D1BPA1_VEIPT ATP synthase subunit beta OS=Veillonella parvula (strain ATCC 10790 / DSM 2008 / CCUG 5123 / JCM 12972 / NCTC 11810 / Te3) OX=479436 GN=atpD PE=3 SV=1	26	4778800	120190000	17	17	5	5	17	5	17	0	5	51.5	51.5	17.5	51.712	323.31	8	290	310
301	E1LB23|E1LB23	tr|E1LB23|E1LB23_9FIRM	tr|E1LB23|E1LB23_9FIRM TonB-dependent receptor plug domain protein OS=Veillonella atypica ACS-134-V-Col7a OX=866778 GN=HMPREF9684_1562 PE=3 SV=1	38	197150000	72530000	27	22	22	27	9	22	4	22	4	45.8	38.1	38.1	73.636	278.29	425	86	558
302	D1BLT5|D1BLT5	tr|D1BLT5|D1BLT5_VEIPT	tr|D1BLT5|D1BLT5_VEIPT UDP-glucose 4-epimerase OS=Veillonella parvula (strain ATCC 10790 / DSM 2008 / CCUG 5123 / JCM 12972 / NCTC 11810 / Te3) OX=479436 GN=Vpar_0659 PE=3 SV=1	17	1425600	150450000	11	11	11	1	11	1	11	1	11	38	38	38	35.908	220.66	2	76	80
303	D1BQZ6|D1BQZ6	tr|D1BQZ6|D1BQZ6_VEIPT	tr|D1BQZ6|D1BQZ6_VEIPT Aminoacyl-histidine dipeptidase OS=Veillonella parvula (strain ATCC 10790 / DSM 2008 / CCUG 5123 / JCM 12972 / NCTC 11810 / Te3) OX=479436 GN=Vpar_0275 PE=4 SV=1	25	1237200	73116000	10	10	9	2	10	2	10	2	9	23.2	23.2	21.8	52.964	119.91	0	23	23
304	D1BNB1|D1BNB1	tr|D1BNB1|D1BNB1_VEIPT	tr|D1BNB1|D1BNB1_VEIPT Hydrogenase (NiFe) small subunit HydA OS=Veillonella parvula (strain ATCC 10790 / DSM 2008 / CCUG 5123 / JCM 12972 / NCTC 11810 / Te3) OX=479436 GN=Vpar_1188 PE=3 SV=1	17	341850000	70534000	16	4	4	13	11	1	4	1	4	50.9	13.7	13.7	41.346	61.3	199	85	352
305	D1BN65|D1BN65;E1L975|E1L975	tr|D1BN65|D1BN65_VEIPT;tr|E1L975|E1L975_9FIRM	tr|D1BN65|D1BN65_VEIPT Precorrin-3B C17-methyltransferase OS=Veillonella parvula (strain ATCC 10790 / DSM 2008 / CCUG 5123 / JCM 12972 / NCTC 11810 / Te3) OX=479436 GN=Vpar_1141 PE=4 SV=1;tr|E1L975|E1L975_9FIRM Precorrin-3B C(17)-methyltransferase OS=Veill	8	19441000	265860000	7	7	7	5	7	5	7	5	7	27.7	27.7	27.7	26.403	66.443	7	76	92
306	D1BNT8|D1BNT8	tr|D1BNT8|D1BNT8_VEIPT	tr|D1BNT8|D1BNT8_VEIPT RND efflux system, outer membrane lipoprotein, NodT family OS=Veillonella parvula (strain ATCC 10790 / DSM 2008 / CCUG 5123 / JCM 12972 / NCTC 11810 / Te3) OX=479436 GN=Vpar_1367 PE=3 SV=1	28	11761000	59247000	10	10	10	1	8	1	8	1	8	16.8	16.8	16.8	62.742	21.312	0	6	13
307	D1BNH0|D1BNH0;E1LBW4|E1LBW4	tr|D1BNH0|D1BNH0_VEIPT;tr|E1LBW4|E1LBW4_9FIRM	tr|D1BNH0|D1BNH0_VEIPT Cobalamin B12-binding domain protein OS=Veillonella parvula (strain ATCC 10790 / DSM 2008 / CCUG 5123 / JCM 12972 / NCTC 11810 / Te3) OX=479436 GN=Vpar_1247 PE=4 SV=1;tr|E1LBW4|E1LBW4_9FIRM B12 binding domain protein OS=Veillonella a	5	207600000	242710000	7	7	7	6	6	6	6	6	6	57.3	57.3	57.3	13.795	50.61	39	50	157
308	D1BP82|D1BP82	tr|D1BP82|D1BP82_VEIPT	tr|D1BP82|D1BP82_VEIPT Nitric oxide reductase large subunit-like protein OS=Veillonella parvula (strain ATCC 10790 / DSM 2008 / CCUG 5123 / JCM 12972 / NCTC 11810 / Te3) OX=479436 GN=Vpar_1513 PE=4 SV=1	17	28264000	148000000	13	13	13	3	12	3	12	3	12	15.7	15.7	15.7	83.812	74.418	6	66	105
309	D1BNC0|D1BNC0;REV__E1LDV9|E1LDV9	tr|D1BNC0|D1BNC0_VEIPT	tr|D1BNC0|D1BNC0_VEIPT Ribonuclease Y OS=Veillonella parvula (strain ATCC 10790 / DSM 2008 / CCUG 5123 / JCM 12972 / NCTC 11810 / Te3) OX=479436 GN=rny PE=3 SV=1	32	160560000	186520000	31	31	10	20	28	20	28	4	10	45.5	45.5	18.1	57.762	291.66	186	154	549
310	D1BMS6|D1BMS6	tr|D1BMS6|D1BMS6_VEIPT	tr|D1BMS6|D1BMS6_VEIPT Transporter, hydrophobe/amphiphile efflux-1 (HAE1) family OS=Veillonella parvula (strain ATCC 10790 / DSM 2008 / CCUG 5123 / JCM 12972 / NCTC 11810 / Te3) OX=479436 GN=Vpar_1002 PE=3 SV=1	39	6579800	122920000	26	26	24	5	21	5	21	4	20	29.5	29.5	27.3	114.16	323.31	62	140	598
311	D1BLE2|D1BLE2	tr|D1BLE2|D1BLE2_VEIPT	tr|D1BLE2|D1BLE2_VEIPT Fructose-1,6-bisphosphatase OS=Veillonella parvula (strain ATCC 10790 / DSM 2008 / CCUG 5123 / JCM 12972 / NCTC 11810 / Te3) OX=479436 GN=Vpar_0516 PE=3 SV=1	18	133590000	238540000	19	10	10	11	17	2	8	2	8	56.6	27.2	27.2	34.176	64.706	273	151	526
312	D1BMC4|D1BMC4	tr|D1BMC4|D1BMC4_VEIPT	tr|D1BMC4|D1BMC4_VEIPT 16S rRNA (cytosine(967)-C(5))-methyltransferase OS=Veillonella parvula (strain ATCC 10790 / DSM 2008 / CCUG 5123 / JCM 12972 / NCTC 11810 / Te3) OX=479436 GN=Vpar_0850 PE=3 SV=1	30	1742200	67237000	7	7	5	1	6	1	6	0	5	16.2	16.2	11.1	51.41	10.395	1	6	15
313	D1BL20|D1BL20	tr|D1BL20|D1BL20_VEIPT	tr|D1BL20|D1BL20_VEIPT Uncharacterized protein OS=Veillonella parvula (strain ATCC 10790 / DSM 2008 / CCUG 5123 / JCM 12972 / NCTC 11810 / Te3) OX=479436 GN=Vpar_0393 PE=4 SV=1	22	215800	105920000	13	13	11	1	13	1	13	1	11	39.4	39.4	34.9	35.803	27.631	0	46	55
314	D1BM39|D1BM39	tr|D1BM39|D1BM39_VEIPT	tr|D1BM39|D1BM39_VEIPT Uncharacterized protein OS=Veillonella parvula (strain ATCC 10790 / DSM 2008 / CCUG 5123 / JCM 12972 / NCTC 11810 / Te3) OX=479436 GN=Vpar_0765 PE=4 SV=1	13	214800000	191900000	10	5	5	5	10	0	5	0	5	39	16.3	16.3	34.53	239.21	140	120	449
315	E1LBA7|E1LBA7	tr|E1LBA7|E1LBA7_9FIRM	tr|E1LBA7|E1LBA7_9FIRM F420_ligase domain-containing protein OS=Veillonella atypica ACS-134-V-Col7a OX=866778 GN=HMPREF9684_1480 PE=4 SV=1	11	421970000	152200000	11	11	2	10	8	10	8	2	0	59.4	59.4	13.4	23.528	166.48	207	107	401
316	D1BN39|D1BN39	tr|D1BN39|D1BN39_VEIPT	tr|D1BN39|D1BN39_VEIPT Phospho-N-acetylmuramoyl-pentapeptide-transferase OS=Veillonella parvula (strain ATCC 10790 / DSM 2008 / CCUG 5123 / JCM 12972 / NCTC 11810 / Te3) OX=479436 GN=mraY PE=3 SV=1	9	61971000	131060000	3	3	1	2	3	2	3	0	1	7.9	7.9	2.1	34.807	14.599	12	7	29
317	D1BMC7|D1BMC7	tr|D1BMC7|D1BMC7_VEIPT	tr|D1BMC7|D1BMC7_VEIPT Non-specific serine/threonine protein kinase OS=Veillonella parvula (strain ATCC 10790 / DSM 2008 / CCUG 5123 / JCM 12972 / NCTC 11810 / Te3) OX=479436 GN=Vpar_0853 PE=4 SV=1	36	119970000	159920000	29	29	19	10	28	10	28	0	18	49.2	49.2	35.4	70.057	323.31	87	198	617
318	E1LDC8|E1LDC8	tr|E1LDC8|E1LDC8_9FIRM	tr|E1LDC8|E1LDC8_9FIRM 4-hydroxy-3-methylbut-2-enyl diphosphate reductase OS=Veillonella atypica ACS-134-V-Col7a OX=866778 GN=ispH PE=3 SV=1	49	154280000	60413000	35	10	10	32	22	10	2	10	2	52.1	17.1	17.1	70.131	85.337	228	139	539
319	sp|D1BLD0|FTSH	sp|D1BLD0|FTSH_VEIPT	sp|D1BLD0|FTSH_VEIPT ATP-dependent zinc metalloprotease FtsH OS=Veillonella parvula (strain ATCC 10790 / DSM 2008 / CCUG 5123 / JCM 12972 / NCTC 11810 / Te3) OX=479436 GN=ftsH PE=3 SV=1	39	109970000	120760000	33	33	24	12	31	12	31	3	23	53.9	53.9	37.7	69.482	323.31	104	123	399
320	D1BLQ8|D1BLQ8	tr|D1BLQ8|D1BLQ8_VEIPT	tr|D1BLQ8|D1BLQ8_VEIPT Ferrous iron transport protein B OS=Veillonella parvula (strain ATCC 10790 / DSM 2008 / CCUG 5123 / JCM 12972 / NCTC 11810 / Te3) OX=479436 GN=Vpar_0632 PE=3 SV=1	40	116640000	18324000	21	2	2	19	13	0	1	0	1	29.7	3.8	3.8	87.595	4.2112	183	20	268
321	E1LB10|E1LB10	tr|E1LB10|E1LB10_9FIRM	tr|E1LB10|E1LB10_9FIRM FAD dependent oxidoreductase OS=Veillonella atypica ACS-134-V-Col7a OX=866778 GN=HMPREF9684_1549 PE=3 SV=1	26	143320000	85758000	17	10	10	15	10	10	3	10	3	38.9	25.7	25.7	48.204	46.214	172	29	206
322	D1BPZ9|D1BPZ9	tr|D1BPZ9|D1BPZ9_VEIPT	tr|D1BPZ9|D1BPZ9_VEIPT Phosphoglycerate transporter OS=Veillonella parvula (strain ATCC 10790 / DSM 2008 / CCUG 5123 / JCM 12972 / NCTC 11810 / Te3) OX=479436 GN=Vpar_1781 PE=4 SV=1	13	1304800	88611000	6	6	6	1	6	1	6	1	6	16.8	16.8	16.8	48.797	64.325	0	72	123
323	E1LCR5|E1LCR5	tr|E1LCR5|E1LCR5_9FIRM	tr|E1LCR5|E1LCR5_9FIRM Ferrous iron transport protein B OS=Veillonella atypica ACS-134-V-Col7a OX=866778 GN=feoB PE=3 SV=1	38	141080000	14491000	24	24	5	24	13	24	13	5	1	34.7	34.7	8.9	87.551	323.31	208	17	289
324	E1LC00|E1LC00	tr|E1LC00|E1LC00_9FIRM	tr|E1LC00|E1LC00_9FIRM GTP diphosphokinase OS=Veillonella atypica ACS-134-V-Col7a OX=866778 GN=relA PE=3 SV=1	51	47385000	29041000	28	10	10	19	15	10	0	10	0	36.1	11.3	11.3	85.36	6.7467	40	136	281
325	E1LDU0|E1LDU0	tr|E1LDU0|E1LDU0_9FIRM	tr|E1LDU0|E1LDU0_9FIRM ATP synthase subunit beta OS=Veillonella atypica ACS-134-V-Col7a OX=866778 GN=atpD PE=3 SV=1	26	7837300	117010000	14	2	2	7	12	2	0	2	0	39.2	5.3	5.3	51.623	3.0451	15	170	191
326	D1BL19|D1BL19	tr|D1BL19|D1BL19_VEIPT	tr|D1BL19|D1BL19_VEIPT NAGPA domain-containing protein OS=Veillonella parvula (strain ATCC 10790 / DSM 2008 / CCUG 5123 / JCM 12972 / NCTC 11810 / Te3) OX=479436 GN=Vpar_0392 PE=4 SV=1	22	72499000	64916000	13	13	8	7	12	7	12	2	7	47.4	47.4	30.4	33.937	107.34	52	70	301
327	E1LCM1|E1LCM1	tr|E1LCM1|E1LCM1_9FIRM	tr|E1LCM1|E1LCM1_9FIRM ABC transporter substrate binding protein OS=Veillonella atypica ACS-134-V-Col7a OX=866778 GN=HMPREF9684_1808 PE=4 SV=1	15	474660000	103490000	13	13	7	13	6	13	6	7	0	52.9	52.9	26.8	34.44	323.31	338	80	528
328	E1LCM4|E1LCM4	tr|E1LCM4|E1LCM4_9FIRM	tr|E1LCM4|E1LCM4_9FIRM 30S ribosomal protein S15 OS=Veillonella atypica ACS-134-V-Col7a OX=866778 GN=rpsO PE=3 SV=1	4	127350000	215930000	5	1	1	4	4	1	0	1	0	52.3	10.2	10.2	10.382	3.0766	121	151	295
329	E1LDP0|E1LDP0	tr|E1LDP0|E1LDP0_9FIRM	tr|E1LDP0|E1LDP0_9FIRM Nitrate reductase, beta subunit OS=Veillonella atypica ACS-134-V-Col7a OX=866778 GN=narH PE=4 SV=1	33	68711000	12015000	18	9	9	17	8	9	1	9	1	39.8	20.4	20.4	54.661	21.581	168	63	258
330	E1LB69|E1LB69	tr|E1LB69|E1LB69_9FIRM	tr|E1LB69|E1LB69_9FIRM NAGPA domain-containing protein OS=Veillonella atypica ACS-134-V-Col7a OX=866778 GN=HMPREF9684_1441 PE=4 SV=1	21	136410000	22167000	11	6	6	11	6	6	1	6	1	39.1	22.1	22.1	33.833	19.157	107	36	234
331	D1BM27|D1BM27	tr|D1BM27|D1BM27_VEIPT	tr|D1BM27|D1BM27_VEIPT Transcriptional repressor NrdR OS=Veillonella parvula (strain ATCC 10790 / DSM 2008 / CCUG 5123 / JCM 12972 / NCTC 11810 / Te3) OX=479436 GN=nrdR PE=3 SV=1	11	162740000	181710000	10	3	3	7	10	0	3	0	3	59.5	23.9	23.9	19.214	31.1	178	75	292
332	E1LA43|E1LA43	tr|E1LA43|E1LA43_9FIRM	tr|E1LA43|E1LA43_9FIRM Ribosome-binding ATPase YchF OS=Veillonella atypica ACS-134-V-Col7a OX=866778 GN=ychF PE=3 SV=1	26	168270000	22567000	20	20	5	18	15	18	15	4	2	50.8	50.8	15.6	41.715	105.13	128	57	243
333	D1BPM2|D1BPM2	tr|D1BPM2|D1BPM2_VEIPT	tr|D1BPM2|D1BPM2_VEIPT S-layer domain protein OS=Veillonella parvula (strain ATCC 10790 / DSM 2008 / CCUG 5123 / JCM 12972 / NCTC 11810 / Te3) OX=479436 GN=Vpar_1653 PE=4 SV=1	39	2541800	93681000	21	21	18	6	19	6	19	3	16	39.7	39.7	35.1	63.502	142.37	6	87	108
334	E1LCM3|E1LCM3	tr|E1LCM3|E1LCM3_9FIRM	tr|E1LCM3|E1LCM3_9FIRM ABC transporter, ATP-binding protein OS=Veillonella atypica ACS-134-V-Col7a OX=866778 GN=HMPREF9684_1810 PE=4 SV=1	17	146670000	75183000	11	5	5	11	6	5	0	5	0	40	17.7	17.7	29.367	21.196	164	29	251
335	D1BR45|D1BR45	tr|D1BR45|D1BR45_VEIPT	tr|D1BR45|D1BR45_VEIPT Ribosome-binding ATPase YchF OS=Veillonella parvula (strain ATCC 10790 / DSM 2008 / CCUG 5123 / JCM 12972 / NCTC 11810 / Te3) OX=479436 GN=ychF PE=3 SV=1	25	171150000	24961000	19	4	4	15	17	1	4	1	4	54.6	17.9	17.9	39.974	22.262	114	52	243
336	D1BQB8|D1BQB8	tr|D1BQB8|D1BQB8_VEIPT	tr|D1BQB8|D1BQB8_VEIPT Hemagluttinin domain protein OS=Veillonella parvula (strain ATCC 10790 / DSM 2008 / CCUG 5123 / JCM 12972 / NCTC 11810 / Te3) OX=479436 GN=Vpar_0042 PE=3 SV=1	138	737760	169950000	103	101	95	3	100	3	98	3	92	53.2	52.2	49.6	245.61	323.31	0	420	698
337	E1LE89|E1LE89	tr|E1LE89|E1LE89_9FIRM	tr|E1LE89|E1LE89_9FIRM Lipid A export permease/ATP-binding protein MsbA OS=Veillonella atypica ACS-134-V-Col7a OX=866778 GN=msbA PE=4 SV=1	34	144810000	26945000	18	8	8	18	8	8	0	8	0	34	17.5	17.5	63.597	82.741	186	47	281
338	D1BLS4|D1BLS4;REV__E1LDG6|E1LDG6;REV__D1BQH0|D1BQH0	tr|D1BLS4|D1BLS4_VEIPT	tr|D1BLS4|D1BLS4_VEIPT UTP--glucose-1-phosphate uridylyltransferase OS=Veillonella parvula (strain ATCC 10790 / DSM 2008 / CCUG 5123 / JCM 12972 / NCTC 11810 / Te3) OX=479436 GN=Vpar_0648 PE=3 SV=1	20	29638000	95786000	13	13	6	4	12	4	12	0	5	41.8	41.8	21.6	31.663	49.776	2	33	57
339	D1BM41|D1BM41	tr|D1BM41|D1BM41_VEIPT	tr|D1BM41|D1BM41_VEIPT ABC transporter related protein OS=Veillonella parvula (strain ATCC 10790 / DSM 2008 / CCUG 5123 / JCM 12972 / NCTC 11810 / Te3) OX=479436 GN=Vpar_0767 PE=4 SV=1	17	60124000	126620000	12	12	6	7	12	7	12	1	6	46.8	46.8	24.5	29.36	121.56	28	115	186
340	E1LDZ9|E1LDZ9;D1BP43|D1BP43	tr|E1LDZ9|E1LDZ9_9FIRM;tr|D1BP43|D1BP43_VEIPT	tr|E1LDZ9|E1LDZ9_9FIRM Protein translocase subunit SecY OS=Veillonella atypica ACS-134-V-Col7a OX=866778 GN=secY PE=3 SV=1;tr|D1BP43|D1BP43_VEIPT Protein translocase subunit SecY OS=Veillonella parvula (strain ATCC 10790 / DSM 2008 / CCUG 5123 / JCM 12972	8	314400000	122360000	6	6	6	6	5	6	5	6	5	12.9	12.9	12.9	45.705	17.968	233	213	670
341	E1LCM5|E1LCM5	tr|E1LCM5|E1LCM5_9FIRM	tr|E1LCM5|E1LCM5_9FIRM Polyribonucleotide nucleotidyltransferase OS=Veillonella atypica ACS-134-V-Col7a OX=866778 GN=pnp PE=3 SV=1	41	50639000	22058000	19	8	8	18	10	8	0	8	0	28.6	14.2	14.2	75.009	17.337	53	16	98
342	E1L9L6|E1L9L6	tr|E1L9L6|E1L9L6_9FIRM	tr|E1L9L6|E1L9L6_9FIRM Non-specific serine/threonine protein kinase OS=Veillonella atypica ACS-134-V-Col7a OX=866778 GN=HMPREF9684_1194 PE=4 SV=1	35	255760000	77672000	28	18	18	28	14	18	4	18	4	51.2	37.3	37.3	69.389	301.94	273	73	446
343	D1BQV6|D1BQV6	tr|D1BQV6|D1BQV6_VEIPT	tr|D1BQV6|D1BQV6_VEIPT Uncharacterized protein OS=Veillonella parvula (strain ATCC 10790 / DSM 2008 / CCUG 5123 / JCM 12972 / NCTC 11810 / Te3) OX=479436 GN=Vpar_0232 PE=3 SV=1	8	126950000	234300000	3	3	2	2	3	2	3	1	2	11	11	6.9	36.629	62.552	77	40	144
344	D1BL59|D1BL59	tr|D1BL59|D1BL59_VEIPT	tr|D1BL59|D1BL59_VEIPT F420_ligase domain-containing protein OS=Veillonella parvula (strain ATCC 10790 / DSM 2008 / CCUG 5123 / JCM 12972 / NCTC 11810 / Te3) OX=479436 GN=Vpar_0432 PE=4 SV=1	11	143680000	189730000	10	1	1	8	9	0	1	0	1	50	3.7	3.7	23.364	-2	191	108	388
345	E1LD92|E1LD92	tr|E1LD92|E1LD92_9FIRM	tr|E1LD92|E1LD92_9FIRM ABC transporter, substrate-binding protein, family 3 OS=Veillonella atypica ACS-134-V-Col7a OX=866778 GN=HMPREF9684_0137 PE=3 SV=1	14	201510000	96695000	10	6	6	10	6	6	2	6	2	52.4	30.1	30.1	29.539	142.22	156	33	215
346	D1BLM8|D1BLM8;E1LCG2|E1LCG2	tr|D1BLM8|D1BLM8_VEIPT;tr|E1LCG2|E1LCG2_9FIRM	tr|D1BLM8|D1BLM8_VEIPT PepSY-associated TM helix domain protein OS=Veillonella parvula (strain ATCC 10790 / DSM 2008 / CCUG 5123 / JCM 12972 / NCTC 11810 / Te3) OX=479436 GN=Vpar_0602 PE=4 SV=1;tr|E1LCG2|E1LCG2_9FIRM PepSY domain protein OS=Veillonella aty	16	4828400	80273000	7	7	7	4	7	4	7	4	7	19.3	19.3	19.3	49.518	224.33	3	22	26
347	E1LCD2|E1LCD2	tr|E1LCD2|E1LCD2_9FIRM	tr|E1LCD2|E1LCD2_9FIRM 50S ribosomal protein L32 OS=Veillonella atypica ACS-134-V-Col7a OX=866778 GN=rpmF PE=3 SV=1	3	147380000	266170000	2	1	1	2	1	1	0	1	0	50	34.5	34.5	6.7049	2.8821	20	10	33
348	E1LB72|E1LB72	tr|E1LB72|E1LB72_9FIRM	tr|E1LB72|E1LB72_9FIRM Uncharacterized protein OS=Veillonella atypica ACS-134-V-Col7a OX=866778 GN=HMPREF9684_1444 PE=4 SV=1	9	8143600	31154000	5	5	2	4	3	4	3	1	0	38.1	38.1	18.1	12.075	3.1944	3	4	13
349	E1LB24|E1LB24	tr|E1LB24|E1LB24_9FIRM	tr|E1LB24|E1LB24_9FIRM TonB-dependent receptor plug domain protein OS=Veillonella atypica ACS-134-V-Col7a OX=866778 GN=HMPREF9684_1563 PE=3 SV=1	38	167680000	21557000	24	18	18	22	9	16	3	16	3	38	29.4	29.4	72.65	129.47	355	84	460
350	D1BLG5|D1BLG5	tr|D1BLG5|D1BLG5_VEIPT	tr|D1BLG5|D1BLG5_VEIPT ABC transporter related protein OS=Veillonella parvula (strain ATCC 10790 / DSM 2008 / CCUG 5123 / JCM 12972 / NCTC 11810 / Te3) OX=479436 GN=Vpar_0539 PE=4 SV=1	33	96655000	51969000	20	20	10	13	18	13	18	3	10	37.5	37.5	21	63.491	220.79	116	81	281
351	D1BQ62|D1BQ62	tr|D1BQ62|D1BQ62_VEIPT	tr|D1BQ62|D1BQ62_VEIPT Uncharacterized protein OS=Veillonella parvula (strain ATCC 10790 / DSM 2008 / CCUG 5123 / JCM 12972 / NCTC 11810 / Te3) OX=479436 GN=Vpar_1845 PE=4 SV=1	7	11392000	170880000	7	7	6	3	7	3	7	2	6	50.3	50.3	45.7	19.243	141.52	3	36	121
352	D1BL08|D1BL08	tr|D1BL08|D1BL08_VEIPT	tr|D1BL08|D1BL08_VEIPT Bro-N domain-containing protein OS=Veillonella parvula (strain ATCC 10790 / DSM 2008 / CCUG 5123 / JCM 12972 / NCTC 11810 / Te3) OX=479436 GN=Vpar_0381 PE=4 SV=1	21	530150	59436000	13	13	13	2	13	2	13	2	13	41	41	41	39.546	119.95	0	110	110
353	E1L9S3|E1L9S3	tr|E1L9S3|E1L9S3_9FIRM	tr|E1L9S3|E1L9S3_9FIRM Diadenylate cyclase OS=Veillonella atypica ACS-134-V-Col7a OX=866778 GN=dacA PE=3 SV=1	12	335380000	31330000	8	2	2	7	8	2	2	2	2	34.8	11.5	11.5	30.527	15.179	51	13	75
354	D1BPB9|D1BPB9	tr|D1BPB9|D1BPB9_VEIPT	tr|D1BPB9|D1BPB9_VEIPT Glutamate dehydrogenase OS=Veillonella parvula (strain ATCC 10790 / DSM 2008 / CCUG 5123 / JCM 12972 / NCTC 11810 / Te3) OX=479436 GN=Vpar_1550 PE=3 SV=1	24	66336000	114490000	17	10	10	9	16	2	10	2	10	45.7	29.2	29.2	46.269	96.709	58	47	194
355	D1BLE7|D1BLE7	tr|D1BLE7|D1BLE7_VEIPT	tr|D1BLE7|D1BLE7_VEIPT Peptidase S55 domain-containing protein OS=Veillonella parvula (strain ATCC 10790 / DSM 2008 / CCUG 5123 / JCM 12972 / NCTC 11810 / Te3) OX=479436 GN=Vpar_0521 PE=4 SV=1	35	6505900	79184000	24	24	18	8	23	8	23	4	17	38.6	38.6	31.8	72.51	323.31	17	224	474
356	D1BLJ8|D1BLJ8	tr|D1BLJ8|D1BLJ8_VEIPT	tr|D1BLJ8|D1BLJ8_VEIPT Copper-translocating P-type ATPase OS=Veillonella parvula (strain ATCC 10790 / DSM 2008 / CCUG 5123 / JCM 12972 / NCTC 11810 / Te3) OX=479436 GN=Vpar_0572 PE=3 SV=1	31	157590000	61977000	21	21	10	14	19	14	19	3	9	35.8	35.8	18.4	77.731	317.94	244	103	560
357	E1LDP1|E1LDP1	tr|E1LDP1|E1LDP1_9FIRM	tr|E1LDP1|E1LDP1_9FIRM Nitrate reductase (quinone) OS=Veillonella atypica ACS-134-V-Col7a OX=866778 GN=HMPREF9684_1296 PE=3 SV=1	79	177800000	51991000	60	60	13	57	43	57	43	13	2	51.7	51.7	14.1	138.01	323.31	805	187	1057
358	D1BNV4|D1BNV4	tr|D1BNV4|D1BNV4_VEIPT	tr|D1BNV4|D1BNV4_VEIPT RNA binding S1 domain protein OS=Veillonella parvula (strain ATCC 10790 / DSM 2008 / CCUG 5123 / JCM 12972 / NCTC 11810 / Te3) OX=479436 GN=Vpar_1383 PE=4 SV=1	43	34159000	26573000	22	22	10	6	17	6	17	3	8	26.9	26.9	10.4	85.973	31.929	4	36	55
359	E1LE19|E1LE19;D1BP63|D1BP63	tr|E1LE19|E1LE19_9FIRM;tr|D1BP63|D1BP63_VEIPT	tr|E1LE19|E1LE19_9FIRM 50S ribosomal protein L3 OS=Veillonella atypica ACS-134-V-Col7a OX=866778 GN=rplC PE=3 SV=1;tr|D1BP63|D1BP63_VEIPT 50S ribosomal protein L3 OS=Veillonella parvula (strain ATCC 10790 / DSM 2008 / CCUG 5123 / JCM 12972 / NCTC 11810 / T	10	776190000	207470000	13	13	13	13	9	13	9	13	9	70.9	70.9	70.9	22.5	232.52	386	84	556
360	E1LE56|E1LE56	tr|E1LE56|E1LE56_9FIRM	tr|E1LE56|E1LE56_9FIRM Copper-exporting ATPase OS=Veillonella atypica ACS-134-V-Col7a OX=866778 GN=HMPREF9684_1121 PE=3 SV=1	32	149980000	25837000	19	8	8	19	12	8	2	8	2	29.7	12.3	12.3	77.658	78.288	246	49	432
361	D1BQ97|D1BQ97	tr|D1BQ97|D1BQ97_VEIPT	tr|D1BQ97|D1BQ97_VEIPT Exopolysaccharide biosynthesis polyprenyl glycosylphosphotransferase OS=Veillonella parvula (strain ATCC 10790 / DSM 2008 / CCUG 5123 / JCM 12972 / NCTC 11810 / Te3) OX=479436 GN=Vpar_0021 PE=3 SV=1	26	215270	98331000	14	14	14	1	14	1	14	1	14	30.7	30.7	30.7	53.853	84.629	0	44	55
362	E1LAC6|E1LAC6;D1BMI8|D1BMI8	tr|E1LAC6|E1LAC6_9FIRM;tr|D1BMI8|D1BMI8_VEIPT	tr|E1LAC6|E1LAC6_9FIRM Elongation factor P OS=Veillonella atypica ACS-134-V-Col7a OX=866778 GN=efp PE=3 SV=1;tr|D1BMI8|D1BMI8_VEIPT Elongation factor P OS=Veillonella parvula (strain ATCC 10790 / DSM 2008 / CCUG 5123 / JCM 12972 / NCTC 11810 / Te3) OX=4794	11	61316000	181990000	7	7	7	7	6	7	6	7	6	38.9	38.9	38.9	20.704	93.055	21	20	51
363	E1LD53|E1LD53	tr|E1LD53|E1LD53_9FIRM	tr|E1LD53|E1LD53_9FIRM Lactaldehyde reductase OS=Veillonella atypica ACS-134-V-Col7a OX=866778 GN=fucO PE=4 SV=1	18	221020000	90627000	11	5	5	11	6	5	0	5	0	35.2	17.5	17.5	40.722	72.935	110	38	162
364	D1BQW0|D1BQW0	tr|D1BQW0|D1BQW0_VEIPT	tr|D1BQW0|D1BQW0_VEIPT Anaerobic c4-dicarboxylate antiporter, Dcu family OS=Veillonella parvula (strain ATCC 10790 / DSM 2008 / CCUG 5123 / JCM 12972 / NCTC 11810 / Te3) OX=479436 GN=Vpar_0236 PE=3 SV=1	11	582320000	6005300	8	8	4	5	3	5	3	1	0	16.2	16.2	8.4	39.091	30.951	107	7	251
365	E1L9M1|E1L9M1	tr|E1L9M1|E1L9M1_9FIRM	tr|E1L9M1|E1L9M1_9FIRM Uridylate kinase OS=Veillonella atypica ACS-134-V-Col7a OX=866778 GN=pyrH PE=3 SV=1	15	91097000	75622000	10	5	5	9	5	5	0	5	0	51.5	26.1	26.1	26.147	25.22	120	38	207
366	D1BN16|D1BN16	tr|D1BN16|D1BN16_VEIPT	tr|D1BN16|D1BN16_VEIPT Uracil phosphoribosyltransferase OS=Veillonella parvula (strain ATCC 10790 / DSM 2008 / CCUG 5123 / JCM 12972 / NCTC 11810 / Te3) OX=479436 GN=upp PE=3 SV=1	14	274270000	75287000	12	12	8	5	9	5	9	1	5	80.8	80.8	58.7	22.696	193.28	88	148	570
367	D1BNU2|D1BNU2;E1LBG2|E1LBG2	tr|D1BNU2|D1BNU2_VEIPT;tr|E1LBG2|E1LBG2_9FIRM	tr|D1BNU2|D1BNU2_VEIPT Peptidyl-prolyl cis-trans isomerase OS=Veillonella parvula (strain ATCC 10790 / DSM 2008 / CCUG 5123 / JCM 12972 / NCTC 11810 / Te3) OX=479436 GN=Vpar_1371 PE=3 SV=1;tr|E1LBG2|E1LBG2_9FIRM Peptidyl-prolyl cis-trans isomerase OS=Veill	8	3103800	205470000	4	4	4	2	4	2	4	2	4	27.1	27.1	27.1	15.468	16.995	0	24	50
368	D1BLG6|D1BLG6	tr|D1BLG6|D1BLG6_VEIPT	tr|D1BLG6|D1BLG6_VEIPT 3-deoxy-D-manno-octulosonic acid transferase OS=Veillonella parvula (strain ATCC 10790 / DSM 2008 / CCUG 5123 / JCM 12972 / NCTC 11810 / Te3) OX=479436 GN=Vpar_0540 PE=3 SV=1	28	15220000	28537000	7	5	5	1	6	0	4	0	4	17.1	13.4	13.4	49.378	14.128	14	22	56
369	D1BQI3|D1BQI3	tr|D1BQI3|D1BQI3_VEIPT	tr|D1BQI3|D1BQI3_VEIPT ABC transporter related protein OS=Veillonella parvula (strain ATCC 10790 / DSM 2008 / CCUG 5123 / JCM 12972 / NCTC 11810 / Te3) OX=479436 GN=Vpar_0107 PE=4 SV=1	34	10478000	34633000	20	20	7	8	17	8	17	0	6	43.6	43.6	17.8	53.652	110.53	31	106	167
370	D1BM77|D1BM77	tr|D1BM77|D1BM77_VEIPT	tr|D1BM77|D1BM77_VEIPT Uncharacterized protein OS=Veillonella parvula (strain ATCC 10790 / DSM 2008 / CCUG 5123 / JCM 12972 / NCTC 11810 / Te3) OX=479436 GN=Vpar_0803 PE=4 SV=1	37	37226000	77678000	19	19	13	7	19	7	19	2	13	29.4	29.4	23.2	76.429	130.31	11	73	192
371	D1BMU8|D1BMU8	tr|D1BMU8|D1BMU8_VEIPT	tr|D1BMU8|D1BMU8_VEIPT Transcriptional regulator CtsR OS=Veillonella parvula (strain ATCC 10790 / DSM 2008 / CCUG 5123 / JCM 12972 / NCTC 11810 / Te3) OX=479436 GN=Vpar_1024 PE=4 SV=1	9	123220000	258690000	8	8	5	4	8	4	8	1	5	67.3	67.3	45.3	18.536	218.9	53	64	151
372	D1BMY8|D1BMY8	tr|D1BMY8|D1BMY8_VEIPT	tr|D1BMY8|D1BMY8_VEIPT Penicillin-binding protein, 1A family OS=Veillonella parvula (strain ATCC 10790 / DSM 2008 / CCUG 5123 / JCM 12972 / NCTC 11810 / Te3) OX=479436 GN=Vpar_1064 PE=4 SV=1	34	107370000	74091000	20	20	12	9	17	9	17	2	10	32.6	32.6	22.7	75.545	211.51	43	72	186
373	D1BM31|D1BM31	tr|D1BM31|D1BM31_VEIPT	tr|D1BM31|D1BM31_VEIPT ADP-L-glycero-D-manno-heptose-6-epimerase OS=Veillonella parvula (strain ATCC 10790 / DSM 2008 / CCUG 5123 / JCM 12972 / NCTC 11810 / Te3) OX=479436 GN=hldD PE=3 SV=1	16	7753600	83424000	11	11	6	2	11	2	11	0	6	35.2	35.2	20.9	36.518	50.588	2	118	125
374	E1LD96|E1LD96	tr|E1LD96|E1LD96_9FIRM	tr|E1LD96|E1LD96_9FIRM Ribosome hibernation promoting factor OS=Veillonella atypica ACS-134-V-Col7a OX=866778 GN=raiA PE=3 SV=1	6	227750000	76402000	7	7	6	7	5	7	5	6	4	49.2	49.2	39	20.649	288.59	554	13	575
375	E1L973|E1L973;D1BN63|D1BN63	tr|E1L973|E1L973_9FIRM;tr|D1BN63|D1BN63_VEIPT	tr|E1L973|E1L973_9FIRM Precorrin-8X methylmutase OS=Veillonella atypica ACS-134-V-Col7a OX=866778 GN=cobH PE=3 SV=1;tr|D1BN63|D1BN63_VEIPT Precorrin-8X methylmutase CbiC/CobH OS=Veillonella parvula (strain ATCC 10790 / DSM 2008 / CCUG 5123 / JCM 12972 / NC	15	74525000	148700000	14	14	14	11	13	11	13	11	13	79.2	79.2	79.2	23.977	186.8	20	49	108
376	E1L950|E1L950	tr|E1L950|E1L950_9FIRM	tr|E1L950|E1L950_9FIRM Penicillin-binding protein, 1A family OS=Veillonella atypica ACS-134-V-Col7a OX=866778 GN=HMPREF9684_1886 PE=4 SV=1	35	237490000	31402000	16	8	8	15	8	8	1	8	1	19.3	9.4	9.4	75.407	42.912	95	26	160
377	D1BPZ1|D1BPZ1	tr|D1BPZ1|D1BPZ1_VEIPT	tr|D1BPZ1|D1BPZ1_VEIPT Lactaldehyde reductase OS=Veillonella parvula (strain ATCC 10790 / DSM 2008 / CCUG 5123 / JCM 12972 / NCTC 11810 / Te3) OX=479436 GN=Vpar_1772 PE=4 SV=1	21	100630000	121440000	13	13	7	7	13	7	13	1	7	41.5	41.5	23.8	40.77	103.84	51	85	157
378	E1LBY1|E1LBY1	tr|E1LBY1|E1LBY1_9FIRM	tr|E1LBY1|E1LBY1_9FIRM Acetate kinase OS=Veillonella atypica ACS-134-V-Col7a OX=866778 GN=ackA PE=3 SV=1	22	17987000	54567000	12	4	4	9	7	4	0	4	0	34.9	11.2	11.2	44.03	5.5528	37	100	144
379	D1BM30|D1BM30	tr|D1BM30|D1BM30_VEIPT	tr|D1BM30|D1BM30_VEIPT Bifunctional protein HldE OS=Veillonella parvula (strain ATCC 10790 / DSM 2008 / CCUG 5123 / JCM 12972 / NCTC 11810 / Te3) OX=479436 GN=hldE PE=3 SV=1	35	27481000	49909000	19	19	16	7	17	7	17	4	14	40.9	40.9	35.4	53.638	88.111	11	63	94
380	E1LC15|E1LC15	tr|E1LC15|E1LC15_9FIRM	tr|E1LC15|E1LC15_9FIRM Ribonuclease Y OS=Veillonella atypica ACS-134-V-Col7a OX=866778 GN=rny PE=3 SV=1	32	273520000	89582000	31	10	10	26	22	10	4	10	4	43.7	16.6	16.6	58.4	61.051	227	127	510
381	E1L9E8|E1L9E8	tr|E1L9E8|E1L9E8_9FIRM	tr|E1L9E8|E1L9E8_9FIRM DEAD/DEAH box helicase OS=Veillonella atypica ACS-134-V-Col7a OX=866778 GN=cshA PE=3 SV=1	27	10973000	6132600	14	4	4	10	11	4	1	4	1	33.3	8.6	8.6	59.812	11.917	31	25	73
382	E1LDD5|E1LDD5	tr|E1LDD5|E1LDD5_9FIRM	tr|E1LDD5|E1LDD5_9FIRM 30S ribosomal protein S9 OS=Veillonella atypica ACS-134-V-Col7a OX=866778 GN=rpsI PE=3 SV=1	7	435080000	153170000	8	8	2	8	5	8	5	2	0	62.3	62.3	6.9	14.419	165.43	65	39	167
383	D1BP19|D1BP19	tr|D1BP19|D1BP19_VEIPT	tr|D1BP19|D1BP19_VEIPT 30S ribosomal protein S9 OS=Veillonella parvula (strain ATCC 10790 / DSM 2008 / CCUG 5123 / JCM 12972 / NCTC 11810 / Te3) OX=479436 GN=rpsI PE=3 SV=1	7	407800000	171220000	8	2	2	6	7	0	2	0	2	62.3	6.9	6.9	14.404	4.1883	37	50	183
384	D1BQZ7|D1BQZ7;E1L9W1|E1L9W1	tr|D1BQZ7|D1BQZ7_VEIPT	tr|D1BQZ7|D1BQZ7_VEIPT Nicotinate phosphoribosyltransferase OS=Veillonella parvula (strain ATCC 10790 / DSM 2008 / CCUG 5123 / JCM 12972 / NCTC 11810 / Te3) OX=479436 GN=Vpar_0276 PE=3 SV=1	26	3385300	34053000	13	13	13	4	12	4	12	4	12	22.8	22.8	22.8	54.927	19.49	3	20	27
385	E1LCX8|E1LCX8	tr|E1LCX8|E1LCX8_9FIRM	tr|E1LCX8|E1LCX8_9FIRM Ribonuclease J OS=Veillonella atypica ACS-134-V-Col7a OX=866778 GN=rnj PE=3 SV=1	39	20031000	43155000	20	5	5	12	13	5	0	5	0	31.9	7.6	7.6	80.303	11.391	28	86	307
386	D1BM43|D1BM43	tr|D1BM43|D1BM43_VEIPT	tr|D1BM43|D1BM43_VEIPT Polyribonucleotide nucleotidyltransferase OS=Veillonella parvula (strain ATCC 10790 / DSM 2008 / CCUG 5123 / JCM 12972 / NCTC 11810 / Te3) OX=479436 GN=pnp PE=3 SV=1	42	19625000	39140000	24	24	13	10	20	10	20	0	10	38.8	38.8	24.4	75.093	61.593	24	28	91
387	D1BKY3|D1BKY3;E1LBD5|E1LBD5	tr|D1BKY3|D1BKY3_VEIPT;tr|E1LBD5|E1LBD5_9FIRM	tr|D1BKY3|D1BKY3_VEIPT Tripeptide aminopeptidase OS=Veillonella parvula (strain ATCC 10790 / DSM 2008 / CCUG 5123 / JCM 12972 / NCTC 11810 / Te3) OX=479436 GN=Vpar_0356 PE=3 SV=1;tr|E1LBD5|E1LBD5_9FIRM Tripeptide aminopeptidase OS=Veillonella atypica ACS-1	26	6861600	76708000	14	14	14	5	14	5	14	5	14	42.3	42.3	42.3	45.01	30.293	3	69	77
388	D1BR25|D1BR25	tr|D1BR25|D1BR25_VEIPT	tr|D1BR25|D1BR25_VEIPT ABC transporter related protein OS=Veillonella parvula (strain ATCC 10790 / DSM 2008 / CCUG 5123 / JCM 12972 / NCTC 11810 / Te3) OX=479436 GN=Vpar_0304 PE=4 SV=1	14	9902600	39385000	6	4	4	2	6	0	4	0	4	24.7	16.3	16.3	28.215	67.467	11	36	57
389	D1BR24|D1BR24	tr|D1BR24|D1BR24_VEIPT	tr|D1BR24|D1BR24_VEIPT Polar amino acid ABC transporter, inner membrane subunit OS=Veillonella parvula (strain ATCC 10790 / DSM 2008 / CCUG 5123 / JCM 12972 / NCTC 11810 / Te3) OX=479436 GN=Vpar_0303 PE=3 SV=1	12	94930000	33687000	5	4	2	3	3	2	3	0	2	23.4	20.6	7.3	24.754	10.469	46	21	100
390	E1L9C5|E1L9C5;D1BN24|D1BN24	tr|E1L9C5|E1L9C5_9FIRM;tr|D1BN24|D1BN24_VEIPT	tr|E1L9C5|E1L9C5_9FIRM 50S ribosomal protein L31 OS=Veillonella atypica ACS-134-V-Col7a OX=866778 GN=rpmE PE=3 SV=1;tr|D1BN24|D1BN24_VEIPT 50S ribosomal protein L31 OS=Veillonella parvula (strain ATCC 10790 / DSM 2008 / CCUG 5123 / JCM 12972 / NCTC 11810 /	5	58167000	179600000	5	5	5	4	5	4	5	4	5	60	60	60	7.3243	27.366	4	18	27
391	E1LC04|E1LC04	tr|E1LC04|E1LC04_9FIRM	tr|E1LC04|E1LC04_9FIRM Histidine--tRNA ligase OS=Veillonella atypica ACS-134-V-Col7a OX=866778 GN=hisS PE=3 SV=1	26	122760000	6518300	10	7	7	7	4	6	2	6	2	23.4	15.4	15.4	47.871	27.803	20	9	35
392	D1BQ85|D1BQ85	tr|D1BQ85|D1BQ85_VEIPT	tr|D1BQ85|D1BQ85_VEIPT UPF0145 protein Vpar_0009 OS=Veillonella parvula (strain ATCC 10790 / DSM 2008 / CCUG 5123 / JCM 12972 / NCTC 11810 / Te3) OX=479436 GN=Vpar_0009 PE=3 SV=1	7	3579600	144600000	5	5	2	2	4	2	4	0	2	42.9	42.9	20	11.324	31.41	8	55	87
393	D1BPT3|D1BPT3	tr|D1BPT3|D1BPT3_VEIPT	tr|D1BPT3|D1BPT3_VEIPT Uncharacterized protein OS=Veillonella parvula (strain ATCC 10790 / DSM 2008 / CCUG 5123 / JCM 12972 / NCTC 11810 / Te3) OX=479436 GN=Vpar_1714 PE=4 SV=1	19	212020	119900000	14	14	9	3	13	3	13	1	9	55.8	55.8	42.3	30.38	88.844	3	73	89
394	D1BMX8|D1BMX8	tr|D1BMX8|D1BMX8_VEIPT	tr|D1BMX8|D1BMX8_VEIPT Inosine-5-monophosphate dehydrogenase OS=Veillonella parvula (strain ATCC 10790 / DSM 2008 / CCUG 5123 / JCM 12972 / NCTC 11810 / Te3) OX=479436 GN=guaB PE=3 SV=1	28	30674000	70888000	18	18	11	6	17	6	17	0	11	39.3	39.3	25.4	51.541	71.9	23	41	75
395	D1BNX6|D1BNX6	tr|D1BNX6|D1BNX6_VEIPT	tr|D1BNX6|D1BNX6_VEIPT Pyruvate kinase OS=Veillonella parvula (strain ATCC 10790 / DSM 2008 / CCUG 5123 / JCM 12972 / NCTC 11810 / Te3) OX=479436 GN=Vpar_1405 PE=3 SV=1	32	38289000	17899000	10	10	6	2	10	2	10	0	6	14.8	14.8	8.6	62	12.212	3	16	26
396	D1BMI0|D1BMI0	tr|D1BMI0|D1BMI0_VEIPT	tr|D1BMI0|D1BMI0_VEIPT Cobyric acid synthase OS=Veillonella parvula (strain ATCC 10790 / DSM 2008 / CCUG 5123 / JCM 12972 / NCTC 11810 / Te3) OX=479436 GN=cobQ PE=3 SV=1	29	136470000	85310000	20	20	8	13	19	13	19	1	8	47.3	47.3	21	55.713	180.78	129	139	320
397	D1BM76|D1BM76	tr|D1BM76|D1BM76_VEIPT	tr|D1BM76|D1BM76_VEIPT Uncharacterized protein OS=Veillonella parvula (strain ATCC 10790 / DSM 2008 / CCUG 5123 / JCM 12972 / NCTC 11810 / Te3) OX=479436 GN=Vpar_0802 PE=4 SV=1	12	15873000	102520000	10	10	10	1	10	1	10	1	10	51.9	51.9	51.9	25.154	101.85	0	85	190
398	D1BPK9|D1BPK9;E1LA21|E1LA21	tr|D1BPK9|D1BPK9_VEIPT;tr|E1LA21|E1LA21_9FIRM	tr|D1BPK9|D1BPK9_VEIPT LPG_synthase_C domain-containing protein OS=Veillonella parvula (strain ATCC 10790 / DSM 2008 / CCUG 5123 / JCM 12972 / NCTC 11810 / Te3) OX=479436 GN=Vpar_1640 PE=4 SV=1;tr|E1LA21|E1LA21_9FIRM LPG_synthase_C domain-containing protei	19	964350	62625000	17	17	17	3	16	3	16	3	16	54.8	54.8	54.8	35.72	93.94	1	104	192
399	D1BQ32|D1BQ32	tr|D1BQ32|D1BQ32_VEIPT	tr|D1BQ32|D1BQ32_VEIPT Uncharacterized protein OS=Veillonella parvula (strain ATCC 10790 / DSM 2008 / CCUG 5123 / JCM 12972 / NCTC 11810 / Te3) OX=479436 GN=Vpar_1814 PE=4 SV=1	29	2462500	47443000	16	16	15	3	16	3	16	3	15	36	36	34.2	48.572	38.899	5	54	59
400	D1BMW7|D1BMW7	tr|D1BMW7|D1BMW7_VEIPT	tr|D1BMW7|D1BMW7_VEIPT Germane domain-containing protein OS=Veillonella parvula (strain ATCC 10790 / DSM 2008 / CCUG 5123 / JCM 12972 / NCTC 11810 / Te3) OX=479436 GN=Vpar_1043 PE=4 SV=1	13	46584000	78767000	8	8	8	3	8	3	8	3	8	36.6	36.6	36.6	20.078	25.167	0	33	85
401	D1BLX3|D1BLX3	tr|D1BLX3|D1BLX3_VEIPT	tr|D1BLX3|D1BLX3_VEIPT Enoyl-(Acyl-carrier-protein) reductase II OS=Veillonella parvula (strain ATCC 10790 / DSM 2008 / CCUG 5123 / JCM 12972 / NCTC 11810 / Te3) OX=479436 GN=Vpar_0697 PE=4 SV=1	16	29104000	101140000	11	8	8	4	10	1	7	1	7	45.5	34.1	34.1	32.983	94.33	97	99	279
402	E1L940|E1L940	tr|E1L940|E1L940_9FIRM	tr|E1L940|E1L940_9FIRM Inosine-5-monophosphate dehydrogenase OS=Veillonella atypica ACS-134-V-Col7a OX=866778 GN=guaB PE=3 SV=1	27	62926000	28659000	14	7	6	13	6	7	0	6	0	31.8	17.9	16.7	51.916	17.338	90	18	113
403	D1BLW2|D1BLW2	tr|D1BLW2|D1BLW2_VEIPT	tr|D1BLW2|D1BLW2_VEIPT Anaerobic ribonucleoside-triphosphate reductase OS=Veillonella parvula (strain ATCC 10790 / DSM 2008 / CCUG 5123 / JCM 12972 / NCTC 11810 / Te3) OX=479436 GN=Vpar_0686 PE=4 SV=1	38	31446000	18220000	28	11	11	16	22	1	11	1	11	37	15.9	15.9	81.933	42.065	88	90	220
404	D1BLX9|D1BLX9	tr|D1BLX9|D1BLX9_VEIPT	tr|D1BLX9|D1BLX9_VEIPT Ribonuclease 3 OS=Veillonella parvula (strain ATCC 10790 / DSM 2008 / CCUG 5123 / JCM 12972 / NCTC 11810 / Te3) OX=479436 GN=rnc PE=3 SV=1	15	13393000	4249400	6	6	6	1	5	1	5	1	5	26	26	26	27.477	4.7195	2	9	15
405	E1LDA0|E1LDA0	tr|E1LDA0|E1LDA0_9FIRM	tr|E1LDA0|E1LDA0_9FIRM Uncharacterized protein OS=Veillonella atypica ACS-134-V-Col7a OX=866778 GN=HMPREF9684_0145 PE=4 SV=1	34	124380000	29975000	19	13	13	16	9	11	3	11	3	28	21.8	21.8	75.854	65.849	113	36	162
406	E1L944|E1L944	tr|E1L944|E1L944_9FIRM	tr|E1L944|E1L944_9FIRM Putative pyruvate, phosphate dikinase regulatory protein OS=Veillonella atypica ACS-134-V-Col7a OX=866778 GN=HMPREF9684_1880 PE=3 SV=1	20	16037000	45005000	10	1	1	8	9	1	0	1	0	38.8	3.3	3.3	30.407	4.0241	19	47	82
407	E1L9K8|E1L9K8	tr|E1L9K8|E1L9K8_9FIRM	tr|E1L9K8|E1L9K8_9FIRM S-adenosylmethionine synthase OS=Veillonella atypica ACS-134-V-Col7a OX=866778 GN=metK PE=3 SV=1	22	105580000	17029000	14	5	5	12	8	5	0	5	0	39.4	14.9	14.9	43.362	7.6468	171	69	268
408	E1LAL4|E1LAL4	tr|E1LAL4|E1LAL4_9FIRM	tr|E1LAL4|E1LAL4_9FIRM Uncharacterized protein OS=Veillonella atypica ACS-134-V-Col7a OX=866778 GN=HMPREF9684_1074 PE=4 SV=1	10	49887000	15173000	5	3	3	5	3	3	1	3	1	40.3	24.7	24.7	17.662	56.649	131	25	188
409	D1BM38|D1BM38	tr|D1BM38|D1BM38_VEIPT	tr|D1BM38|D1BM38_VEIPT Uncharacterized protein OS=Veillonella parvula (strain ATCC 10790 / DSM 2008 / CCUG 5123 / JCM 12972 / NCTC 11810 / Te3) OX=479436 GN=Vpar_0764 PE=4 SV=1	16	211500000	90750000	12	11	3	9	12	8	11	0	3	58.2	54.8	17.5	34.57	323.31	300	102	612
410	E1LBQ0|E1LBQ0	tr|E1LBQ0|E1LBQ0_9FIRM	tr|E1LBQ0|E1LBQ0_9FIRM N-acetylmuramoyl-L-alanine amidase OS=Veillonella atypica ACS-134-V-Col7a OX=866778 GN=HMPREF9684_0739 PE=4 SV=1	23	7091500	66144000	6	2	2	6	4	2	0	2	0	15.7	6.3	6.3	38.574	8.6313	9	16	27
411	D1BM71|D1BM71	tr|D1BM71|D1BM71_VEIPT	tr|D1BM71|D1BM71_VEIPT ABC transporter related protein OS=Veillonella parvula (strain ATCC 10790 / DSM 2008 / CCUG 5123 / JCM 12972 / NCTC 11810 / Te3) OX=479436 GN=Vpar_0797 PE=4 SV=1	13	39839000	102120000	8	7	7	2	8	1	7	1	7	33.6	30.7	30.7	26.577	47.048	1	30	51
412	D1BM24|D1BM24	tr|D1BM24|D1BM24_VEIPT	tr|D1BM24|D1BM24_VEIPT Anion transporter OS=Veillonella parvula (strain ATCC 10790 / DSM 2008 / CCUG 5123 / JCM 12972 / NCTC 11810 / Te3) OX=479436 GN=Vpar_0750 PE=3 SV=1	11	373840000	92178000	5	5	5	3	5	3	5	3	5	14.8	14.8	14.8	50.243	71.414	92	31	161
413	E1LCM0|E1LCM0	tr|E1LCM0|E1LCM0_9FIRM	tr|E1LCM0|E1LCM0_9FIRM ABC transporter substrate binding protein OS=Veillonella atypica ACS-134-V-Col7a OX=866778 GN=HMPREF9684_1807 PE=4 SV=1	16	231930000	61875000	12	3	3	12	9	3	0	3	0	59.1	18.5	18.5	34.696	23.173	307	98	605
414	E1LD79|E1LD79	tr|E1LD79|E1LD79_9FIRM	tr|E1LD79|E1LD79_9FIRM ABC transporter, substrate-binding protein, family 5 OS=Veillonella atypica ACS-134-V-Col7a OX=866778 GN=HMPREF9684_0923 PE=4 SV=1	29	1.0479e+09	112370000	23	4	4	19	17	3	1	3	1	39.7	10.5	10.5	57.798	54.84	495	67	762
415	D1BMY3|D1BMY3	tr|D1BMY3|D1BMY3_VEIPT	tr|D1BMY3|D1BMY3_VEIPT Putative pyruvate, phosphate dikinase regulatory protein OS=Veillonella parvula (strain ATCC 10790 / DSM 2008 / CCUG 5123 / JCM 12972 / NCTC 11810 / Te3) OX=479436 GN=Vpar_1059 PE=3 SV=1	18	19200000	76732000	12	12	3	8	12	8	12	1	3	50.9	50.9	15.4	30.404	64.434	18	70	107
416	D1BP15|D1BP15	tr|D1BP15|D1BP15_VEIPT	tr|D1BP15|D1BP15_VEIPT Heavy metal transport/detoxification protein OS=Veillonella parvula (strain ATCC 10790 / DSM 2008 / CCUG 5123 / JCM 12972 / NCTC 11810 / Te3) OX=479436 GN=Vpar_1445 PE=4 SV=1	7	63993000	323520000	6	6	4	4	6	4	6	2	4	79.4	79.4	53.9	10.701	46.209	4	41	64
417	D1BN72|D1BN72	tr|D1BN72|D1BN72_VEIPT	tr|D1BN72|D1BN72_VEIPT KWG Leptospira repeat protein OS=Veillonella parvula (strain ATCC 10790 / DSM 2008 / CCUG 5123 / JCM 12972 / NCTC 11810 / Te3) OX=479436 GN=Vpar_1148 PE=4 SV=1	30	20740000	94675000	25	25	18	11	25	11	25	7	18	53.1	53.1	41.1	57.978	223.39	1	105	176
418	D1BPD1|D1BPD1	tr|D1BPD1|D1BPD1_VEIPT	tr|D1BPD1|D1BPD1_VEIPT Extracellular solute-binding protein family 5 OS=Veillonella parvula (strain ATCC 10790 / DSM 2008 / CCUG 5123 / JCM 12972 / NCTC 11810 / Te3) OX=479436 GN=Vpar_1562 PE=4 SV=1	29	891810000	117690000	25	25	6	17	20	17	20	1	4	46.4	46.4	17.2	57.784	254.01	458	84	690
419	E1LC11|E1LC11	tr|E1LC11|E1LC11_9FIRM	tr|E1LC11|E1LC11_9FIRM Ribosomal protein S12 methylthiotransferase RimO OS=Veillonella atypica ACS-134-V-Col7a OX=866778 GN=rimO PE=3 SV=1	23	44071000	25089000	13	8	8	12	4	7	1	7	1	33.5	20.8	20.8	50.434	29.488	46	20	100
420	E1LA32|E1LA32	tr|E1LA32|E1LA32_9FIRM	tr|E1LA32|E1LA32_9FIRM Uncharacterized protein OS=Veillonella atypica ACS-134-V-Col7a OX=866778 GN=HMPREF9684_1850 PE=4 SV=1	32	8531600	25980000	6	3	3	6	3	3	0	3	0	13.2	8.1	8.1	57.494	26.88	11	9	22
421	D1BM57|D1BM57	tr|D1BM57|D1BM57_VEIPT	tr|D1BM57|D1BM57_VEIPT Transcription termination/antitermination protein NusA OS=Veillonella parvula (strain ATCC 10790 / DSM 2008 / CCUG 5123 / JCM 12972 / NCTC 11810 / Te3) OX=479436 GN=nusA PE=3 SV=1	24	7205300	57078000	15	15	7	4	13	4	13	0	6	49.2	49.2	26	39.983	162.04	8	49	80
422	D1BLL8|D1BLL8	tr|D1BLL8|D1BLL8_VEIPT	tr|D1BLL8|D1BLL8_VEIPT Holliday junction ATP-dependent DNA helicase RuvB OS=Veillonella parvula (strain ATCC 10790 / DSM 2008 / CCUG 5123 / JCM 12972 / NCTC 11810 / Te3) OX=479436 GN=ruvB PE=3 SV=1	19	27849000	47292000	10	10	5	6	9	6	9	1	5	32.3	32.3	17.4	37.077	21.226	12	16	44
423	D1BLH0|D1BLH0	tr|D1BLH0|D1BLH0_VEIPT	tr|D1BLH0|D1BLH0_VEIPT KpsF/GutQ family protein OS=Veillonella parvula (strain ATCC 10790 / DSM 2008 / CCUG 5123 / JCM 12972 / NCTC 11810 / Te3) OX=479436 GN=Vpar_0544 PE=3 SV=1	16	6862900	48633000	11	11	7	4	10	4	10	1	7	37.8	37.8	28.2	34.514	151.09	9	61	91
424	D1BND7|D1BND7	tr|D1BND7|D1BND7_VEIPT	tr|D1BND7|D1BND7_VEIPT Biotin and thiamin synthesis associated OS=Veillonella parvula (strain ATCC 10790 / DSM 2008 / CCUG 5123 / JCM 12972 / NCTC 11810 / Te3) OX=479436 GN=Vpar_1214 PE=4 SV=1	28	16298000	93544000	18	18	9	10	18	10	18	2	9	43	43	24.4	53.38	170.32	24	106	146
425	D1BLE3|D1BLE3	tr|D1BLE3|D1BLE3_VEIPT	tr|D1BLE3|D1BLE3_VEIPT UDP-N-acetylglucosamine 1-carboxyvinyltransferase OS=Veillonella parvula (strain ATCC 10790 / DSM 2008 / CCUG 5123 / JCM 12972 / NCTC 11810 / Te3) OX=479436 GN=murA PE=3 SV=1	23	3694700	70272000	13	13	6	5	12	5	12	1	5	35.6	35.6	21.4	44.789	82.881	7	80	114
426	E1LDJ7|E1LDJ7	tr|E1LDJ7|E1LDJ7_9FIRM	tr|E1LDJ7|E1LDJ7_9FIRM Sugar ABC transporter, ATP binding protein OS=Veillonella atypica ACS-134-V-Col7a OX=866778 GN=rbsA PE=4 SV=1	34	19988000	17757000	16	3	3	11	13	3	2	3	2	30.8	5.1	5.1	53.757	4.6205	40	67	125
427	D1BLR6|D1BLR6	tr|D1BLR6|D1BLR6_VEIPT	tr|D1BLR6|D1BLR6_VEIPT Radical SAM domain protein OS=Veillonella parvula (strain ATCC 10790 / DSM 2008 / CCUG 5123 / JCM 12972 / NCTC 11810 / Te3) OX=479436 GN=Vpar_0640 PE=3 SV=1	33	43074000	40027000	25	25	13	14	20	14	20	4	12	50.1	50.1	26.4	53.288	133.58	109	82	243
428	D1BQU6|D1BQU6	tr|D1BQU6|D1BQU6_VEIPT	tr|D1BQU6|D1BQU6_VEIPT Nitrate reductase (quinone) OS=Veillonella parvula (strain ATCC 10790 / DSM 2008 / CCUG 5123 / JCM 12972 / NCTC 11810 / Te3) OX=479436 GN=Vpar_0222 PE=3 SV=1	80	149720000	66530000	59	12	12	46	52	2	11	2	11	49.9	12.2	12.2	138.25	129.28	652	232	970
429	D1BLB8|D1BLB8	tr|D1BLB8|D1BLB8_VEIPT	tr|D1BLB8|D1BLB8_VEIPT ABC transporter related protein OS=Veillonella parvula (strain ATCC 10790 / DSM 2008 / CCUG 5123 / JCM 12972 / NCTC 11810 / Te3) OX=479436 GN=Vpar_0492 PE=4 SV=1	27	2008200	2814400	9	9	4	2	7	2	7	0	2	20.7	20.7	10.6	58.962	10.995	1	10	16
430	D1BPY7|D1BPY7	tr|D1BPY7|D1BPY7_VEIPT	tr|D1BPY7|D1BPY7_VEIPT FAD linked oxidase domain protein OS=Veillonella parvula (strain ATCC 10790 / DSM 2008 / CCUG 5123 / JCM 12972 / NCTC 11810 / Te3) OX=479436 GN=Vpar_1768 PE=4 SV=1	53	35474000	62540000	38	38	15	22	36	22	36	1	15	45.3	45.3	19.1	104.83	193.28	200	246	487
431	E1LBB4|E1LBB4	tr|E1LBB4|E1LBB4_9FIRM	tr|E1LBB4|E1LBB4_9FIRM Malic enzyme, NAD binding domain protein OS=Veillonella atypica ACS-134-V-Col7a OX=866778 GN=HMPREF9684_1487 PE=3 SV=1	27	53488000	30010000	13	3	3	11	9	3	0	3	0	36.9	10	10	42.645	37.162	46	50	109
432	D1BN14|D1BN14	tr|D1BN14|D1BN14_VEIPT	tr|D1BN14|D1BN14_VEIPT Glyceraldehyde-3-phosphate dehydrogenase OS=Veillonella parvula (strain ATCC 10790 / DSM 2008 / CCUG 5123 / JCM 12972 / NCTC 11810 / Te3) OX=479436 GN=Vpar_1090 PE=3 SV=1	21	84936000	135980000	20	20	3	13	17	13	17	1	3	73.5	73.5	11.9	36.555	189.35	91	108	357
433	E1L9B7|E1L9B7	tr|E1L9B7|E1L9B7_9FIRM	tr|E1L9B7|E1L9B7_9FIRM Uracil phosphoribosyltransferase OS=Veillonella atypica ACS-134-V-Col7a OX=866778 GN=upp PE=3 SV=1	12	386530000	73357000	8	4	4	8	4	4	0	4	0	51.9	29.8	29.8	22.627	172.53	287	66	443
434	D1BP29|D1BP29;E1LDY5|E1LDY5	tr|D1BP29|D1BP29_VEIPT	tr|D1BP29|D1BP29_VEIPT Pyruvate ferredoxin/flavodoxin oxidoreductase, beta subunit OS=Veillonella parvula (strain ATCC 10790 / DSM 2008 / CCUG 5123 / JCM 12972 / NCTC 11810 / Te3) OX=479436 GN=Vpar_1460 PE=4 SV=1	16	1585500	25824000	10	10	10	2	10	2	10	2	10	43.8	43.8	43.8	31.446	196.95	3	57	117
435	D1BM82|D1BM82	tr|D1BM82|D1BM82_VEIPT	tr|D1BM82|D1BM82_VEIPT Cell division protein FtsX OS=Veillonella parvula (strain ATCC 10790 / DSM 2008 / CCUG 5123 / JCM 12972 / NCTC 11810 / Te3) OX=479436 GN=Vpar_0808 PE=3 SV=1	9	189130000	102020000	9	9	3	5	9	5	9	0	3	29.5	29.5	17.3	32.712	95.425	60	38	119
436	D1BQF6|D1BQF6	tr|D1BQF6|D1BQF6_VEIPT	tr|D1BQF6|D1BQF6_VEIPT Electron transfer flavoprotein alpha subunit OS=Veillonella parvula (strain ATCC 10790 / DSM 2008 / CCUG 5123 / JCM 12972 / NCTC 11810 / Te3) OX=479436 GN=Vpar_0080 PE=3 SV=1	14	14687000	98231000	9	9	2	4	9	4	9	1	2	32.4	32.4	6.9	36.595	93.972	2	87	94
437	E1LC16|E1LC16	tr|E1LC16|E1LC16_9FIRM	tr|E1LC16|E1LC16_9FIRM DNA primase OS=Veillonella atypica ACS-134-V-Col7a OX=866778 GN=dnaG PE=3 SV=1	38	10422000	8939500	11	4	4	6	4	3	0	3	0	20.5	7.9	7.9	67.22	1.8697	8	7	27
438	D1BN71|D1BN71;E1L981|E1L981	tr|D1BN71|D1BN71_VEIPT;tr|E1L981|E1L981_9FIRM	tr|D1BN71|D1BN71_VEIPT UPF0234 protein Vpar_1147 OS=Veillonella parvula (strain ATCC 10790 / DSM 2008 / CCUG 5123 / JCM 12972 / NCTC 11810 / Te3) OX=479436 GN=Vpar_1147 PE=3 SV=1;tr|E1L981|E1L981_9FIRM UPF0234 protein HMPREF9684_0706 OS=Veillonella atypica	10	71246000	120800000	8	8	8	4	7	4	7	4	7	43.3	43.3	43.3	18.313	68.428	19	39	113
439	E1LE84|E1LE84	tr|E1LE84|E1LE84_9FIRM	tr|E1LE84|E1LE84_9FIRM Sugar isomerase, KpsF/GutQ family OS=Veillonella atypica ACS-134-V-Col7a OX=866778 GN=HMPREF9684_1150 PE=3 SV=1	13	5972600	7928200	6	2	2	5	3	2	0	2	0	16.7	7.1	7.1	34.4	5.0503	23	23	56
440	E1L984|E1L984	tr|E1L984|E1L984_9FIRM	tr|E1L984|E1L984_9FIRM Fructose-1,6-bisphosphate aldolase, class II OS=Veillonella atypica ACS-134-V-Col7a OX=866778 GN=fba PE=4 SV=1	18	8583100	100230000	12	1	1	7	11	1	0	1	0	44.7	2.9	2.9	33.47	-2	39	97	145
441	E1LAG4|E1LAG4	tr|E1LAG4|E1LAG4_9FIRM	tr|E1LAG4|E1LAG4_9FIRM ATP-dependent zinc metalloprotease FtsH OS=Veillonella atypica ACS-134-V-Col7a OX=866778 GN=hflB PE=3 SV=1	40	223470000	35185000	29	20	20	29	10	20	2	20	2	54.6	38.2	38.2	68.716	121.49	217	54	322
442	D1BN74|D1BN74	tr|D1BN74|D1BN74_VEIPT	tr|D1BN74|D1BN74_VEIPT Fructose-1,6-bisphosphate aldolase, class II OS=Veillonella parvula (strain ATCC 10790 / DSM 2008 / CCUG 5123 / JCM 12972 / NCTC 11810 / Te3) OX=479436 GN=Vpar_1150 PE=4 SV=1	18	8583100	104150000	12	12	1	6	12	6	12	0	1	44.7	44.7	2.9	33.567	61.896	34	109	152
443	D1BM73|D1BM73	tr|D1BM73|D1BM73_VEIPT	tr|D1BM73|D1BM73_VEIPT Ribosome hibernation promoting factor OS=Veillonella parvula (strain ATCC 10790 / DSM 2008 / CCUG 5123 / JCM 12972 / NCTC 11810 / Te3) OX=479436 GN=hpf PE=3 SV=1	6	42095000	207260000	7	6	6	5	7	4	6	4	6	51.4	41.1	41.1	20.379	86.527	37	49	148
444	D1BL66|D1BL66	tr|D1BL66|D1BL66_VEIPT	tr|D1BL66|D1BL66_VEIPT Malic protein NAD-binding protein OS=Veillonella parvula (strain ATCC 10790 / DSM 2008 / CCUG 5123 / JCM 12972 / NCTC 11810 / Te3) OX=479436 GN=Vpar_0439 PE=3 SV=1	27	34752000	52880000	15	15	5	8	13	8	13	0	4	43.4	43.4	16.5	42.622	89.503	27	63	102
445	D1BN41|D1BN41	tr|D1BN41|D1BN41_VEIPT	tr|D1BN41|D1BN41_VEIPT UDP-N-acetylmuramoyl-L-alanyl-D-glutamate--2,6-diaminopimelate ligase OS=Veillonella parvula (strain ATCC 10790 / DSM 2008 / CCUG 5123 / JCM 12972 / NCTC 11810 / Te3) OX=479436 GN=murE PE=3 SV=1	24	11278000	53167000	18	18	15	3	17	3	17	2	14	31	31	26.1	53.869	90.767	0	54	57
446	D1BLA4|D1BLA4	tr|D1BLA4|D1BLA4_VEIPT	tr|D1BLA4|D1BLA4_VEIPT Cytochrome bd ubiquinol oxidase subunit I OS=Veillonella parvula (strain ATCC 10790 / DSM 2008 / CCUG 5123 / JCM 12972 / NCTC 11810 / Te3) OX=479436 GN=Vpar_0477 PE=3 SV=1	11	1328200	90691000	9	9	8	3	8	3	8	2	7	18.4	18.4	16.2	51.321	83.421	3	29	46
447	D1BLX1|D1BLX1	tr|D1BLX1|D1BLX1_VEIPT	tr|D1BLX1|D1BLX1_VEIPT Phosphate acyltransferase OS=Veillonella parvula (strain ATCC 10790 / DSM 2008 / CCUG 5123 / JCM 12972 / NCTC 11810 / Te3) OX=479436 GN=plsX PE=3 SV=1	18	7777000	27969000	8	6	6	2	8	0	6	0	6	28.4	20.2	20.2	36.178	78.27	36	42	103
448	D1BM84|D1BM84	tr|D1BM84|D1BM84_VEIPT	tr|D1BM84|D1BM84_VEIPT Carboxyl-terminal protease OS=Veillonella parvula (strain ATCC 10790 / DSM 2008 / CCUG 5123 / JCM 12972 / NCTC 11810 / Te3) OX=479436 GN=Vpar_0810 PE=3 SV=1	26	497170	23320000	17	17	17	1	13	1	13	1	13	56.7	56.7	56.7	41.34	127.75	0	37	172
449	E1LBW5|E1LBW5	tr|E1LBW5|E1LBW5_9FIRM	tr|E1LBW5|E1LBW5_9FIRM LAO/AO transport system ATPase OS=Veillonella atypica ACS-134-V-Col7a OX=866778 GN=HMPREF9684_0451 PE=3 SV=1	17	56049000	115470000	12	3	3	9	9	3	0	3	0	54.2	16.3	16.3	34.056	130.1	57	71	179
450	D1BLG3|D1BLG3	tr|D1BLG3|D1BLG3_VEIPT	tr|D1BLG3|D1BLG3_VEIPT Uncharacterized protein OS=Veillonella parvula (strain ATCC 10790 / DSM 2008 / CCUG 5123 / JCM 12972 / NCTC 11810 / Te3) OX=479436 GN=Vpar_0537 PE=4 SV=1	20	74210000	25246000	10	10	7	6	10	6	10	3	7	30.2	30.2	21.6	30.403	9.8885	19	18	47
451	E1LDA5|E1LDA5	tr|E1LDA5|E1LDA5_9FIRM	tr|E1LDA5|E1LDA5_9FIRM Cell division protein FtsX OS=Veillonella atypica ACS-134-V-Col7a OX=866778 GN=HMPREF9684_0150 PE=3 SV=1	10	208810000	29179000	8	2	2	7	6	2	0	2	0	18.4	6.4	6.4	33.274	9.4816	91	30	137
452	D1BNG9|D1BNG9	tr|D1BNG9|D1BNG9_VEIPT	tr|D1BNG9|D1BNG9_VEIPT LAO/AO transport system ATPase OS=Veillonella parvula (strain ATCC 10790 / DSM 2008 / CCUG 5123 / JCM 12972 / NCTC 11810 / Te3) OX=479436 GN=Vpar_1246 PE=3 SV=1	17	40295000	138440000	12	12	3	6	12	6	12	0	3	54.2	54.2	16.3	33.973	323.31	44	111	235
453	D1BQ65|D1BQ65;E1L9Q5|E1L9Q5	tr|D1BQ65|D1BQ65_VEIPT;tr|E1L9Q5|E1L9Q5_9FIRM	tr|D1BQ65|D1BQ65_VEIPT Cobyrinic acid ac-diamide synthase OS=Veillonella parvula (strain ATCC 10790 / DSM 2008 / CCUG 5123 / JCM 12972 / NCTC 11810 / Te3) OX=479436 GN=Vpar_1848 PE=4 SV=1;tr|E1L9Q5|E1L9Q5_9FIRM Sporulation initiation inhibitor protein Soj	9	5657400	137520000	6	6	6	2	6	2	6	2	6	29.3	29.3	29.3	27.482	28.724	3	34	52
454	E1LB07|E1LB07	tr|E1LB07|E1LB07_9FIRM	tr|E1LB07|E1LB07_9FIRM Electron transfer flavoprotein subunit alpha OS=Veillonella atypica ACS-134-V-Col7a OX=866778 GN=etfA PE=3 SV=1	15	14126000	62124000	8	1	1	4	7	1	0	1	0	30.5	4.8	4.8	36.456	2.0085	3	45	53
455	D1BMF7|D1BMF7	tr|D1BMF7|D1BMF7_VEIPT	tr|D1BMF7|D1BMF7_VEIPT Chaperone protein DnaJ OS=Veillonella parvula (strain ATCC 10790 / DSM 2008 / CCUG 5123 / JCM 12972 / NCTC 11810 / Te3) OX=479436 GN=dnaJ PE=3 SV=1	22	691750	60021000	12	12	6	3	12	3	12	0	6	38	38	21.9	41.821	97.779	10	46	73
456	D1BPP0|D1BPP0	tr|D1BPP0|D1BPP0_VEIPT	tr|D1BPP0|D1BPP0_VEIPT DNA helicase OS=Veillonella parvula (strain ATCC 10790 / DSM 2008 / CCUG 5123 / JCM 12972 / NCTC 11810 / Te3) OX=479436 GN=Vpar_1671 PE=4 SV=1	79	7475700	4656100	14	12	12	4	12	2	12	2	12	10.2	8.3	8.3	135.26	16.27	2	15	18
457	E1LDF3|E1LDF3;D1BQP9|D1BQP9	tr|E1LDF3|E1LDF3_9FIRM;tr|D1BQP9|D1BQP9_VEIPT	tr|E1LDF3|E1LDF3_9FIRM Isoleucine--tRNA ligase OS=Veillonella atypica ACS-134-V-Col7a OX=866778 GN=ileS PE=3 SV=1;tr|D1BQP9|D1BQP9_VEIPT Isoleucine--tRNA ligase OS=Veillonella parvula (strain ATCC 10790 / DSM 2008 / CCUG 5123 / JCM 12972 / NCTC 11810 / Te3	53	4451500	6087100	5	5	5	2	4	2	4	2	4	5	5	5	107.33	7.7874	2	5	9
458	E1LEB1|E1LEB1	tr|E1LEB1|E1LEB1_9FIRM	tr|E1LEB1|E1LEB1_9FIRM UDP-N-acetylglucosamine 1-carboxyvinyltransferase OS=Veillonella atypica ACS-134-V-Col7a OX=866778 GN=murA PE=3 SV=1	21	7895000	48970000	9	2	2	6	7	2	0	2	0	20.4	6.2	6.2	44.766	3.3609	10	64	88
459	E1LBF8|E1LBF8	tr|E1LBF8|E1LBF8_9FIRM	tr|E1LBF8|E1LBF8_9FIRM Amino acid permease OS=Veillonella atypica ACS-134-V-Col7a OX=866778 GN=lysP PE=4 SV=1	8	217270000	17907000	5	2	2	5	2	2	0	2	0	8.1	5.3	5.3	53.956	179.95	21	2	28
460	D1BP01|D1BP01	tr|D1BP01|D1BP01_VEIPT	tr|D1BP01|D1BP01_VEIPT Pyridoxal phosphate homeostasis protein OS=Veillonella parvula (strain ATCC 10790 / DSM 2008 / CCUG 5123 / JCM 12972 / NCTC 11810 / Te3) OX=479436 GN=Vpar_1431 PE=3 SV=1	15	51853000	5357900	12	12	10	1	6	1	6	0	5	49.1	49.1	42.5	25.915	24.676	1	7	43
461	E1L9Y4|E1L9Y4	tr|E1L9Y4|E1L9Y4_9FIRM	tr|E1L9Y4|E1L9Y4_9FIRM Ribonucleoside-diphosphate reductase OS=Veillonella atypica ACS-134-V-Col7a OX=866778 GN=HMPREF9684_1591 PE=3 SV=1	49	11339000	27864000	30	1	1	14	24	1	0	1	0	37.8	2.4	2.4	86.76	20.036	23	84	218
462	E1LDA4|E1LDA4	tr|E1LDA4|E1LDA4_9FIRM	tr|E1LDA4|E1LDA4_9FIRM Cell division ATP-binding protein FtsE OS=Veillonella atypica ACS-134-V-Col7a OX=866778 GN=ftsE PE=3 SV=1	10	183200000	96741000	7	7	5	7	3	7	3	5	1	32.9	32.9	22.4	25.289	119.13	218	88	318
463	E1LD47|E1LD47	tr|E1LD47|E1LD47_9FIRM	tr|E1LD47|E1LD47_9FIRM FAD linked oxidase, C-terminal domain protein OS=Veillonella atypica ACS-134-V-Col7a OX=866778 GN=HMPREF9684_0382 PE=4 SV=1	52	62939000	34369000	36	13	13	34	24	13	3	13	3	38.3	12.1	12.1	104.64	54.979	329	90	443
464	D1BNH5|D1BNH5	tr|D1BNH5|D1BNH5_VEIPT	tr|D1BNH5|D1BNH5_VEIPT Valine--tRNA ligase OS=Veillonella parvula (strain ATCC 10790 / DSM 2008 / CCUG 5123 / JCM 12972 / NCTC 11810 / Te3) OX=479436 GN=valS PE=3 SV=1	53	919920	31892000	22	22	11	3	22	3	22	0	11	25	25	12.3	102.34	74.896	3	56	79
465	E1L982|E1L982	tr|E1L982|E1L982_9FIRM	tr|E1L982|E1L982_9FIRM Uncharacterized protein OS=Veillonella atypica ACS-134-V-Col7a OX=866778 GN=HMPREF9684_0707 PE=4 SV=1	32	10683000	33814000	12	5	5	9	7	5	0	5	0	20.5	8.5	8.5	58.003	18.915	7	35	62
466	D1BNI0|D1BNI0	tr|D1BNI0|D1BNI0_VEIPT	tr|D1BNI0|D1BNI0_VEIPT ATP-dependent Clp protease ATP-binding subunit ClpX OS=Veillonella parvula (strain ATCC 10790 / DSM 2008 / CCUG 5123 / JCM 12972 / NCTC 11810 / Te3) OX=479436 GN=clpX PE=3 SV=1	27	26645000	116620000	18	18	10	7	17	7	17	1	9	49.2	49.2	29.7	46.133	86.401	48	77	183
467	D1BN40|D1BN40	tr|D1BN40|D1BN40_VEIPT	tr|D1BN40|D1BN40_VEIPT UDP-N-acetylmuramoyl-tripeptide--D-alanyl-D-alanine ligase OS=Veillonella parvula (strain ATCC 10790 / DSM 2008 / CCUG 5123 / JCM 12972 / NCTC 11810 / Te3) OX=479436 GN=murF PE=3 SV=1	25	592040	22342000	13	13	10	2	12	2	12	1	10	28.8	28.8	21.9	49.431	16.023	1	35	40
468	D1BPH5|D1BPH5	tr|D1BPH5|D1BPH5_VEIPT	tr|D1BPH5|D1BPH5_VEIPT Ribonucleoside-diphosphate reductase OS=Veillonella parvula (strain ATCC 10790 / DSM 2008 / CCUG 5123 / JCM 12972 / NCTC 11810 / Te3) OX=479436 GN=Vpar_1606 PE=3 SV=1	47	12676000	32795000	34	34	5	14	28	14	28	1	4	44.6	44.6	9.2	86.742	272.86	25	104	253
469	D1BR14|D1BR14	tr|D1BR14|D1BR14_VEIPT	tr|D1BR14|D1BR14_VEIPT YbbR family protein OS=Veillonella parvula (strain ATCC 10790 / DSM 2008 / CCUG 5123 / JCM 12972 / NCTC 11810 / Te3) OX=479436 GN=Vpar_0293 PE=4 SV=1	15	14666000	85965000	12	12	10	4	9	4	9	2	8	38.6	38.6	33.8	33.6	42.211	3	23	79
470	D1BLY4|D1BLY4	tr|D1BLY4|D1BLY4_VEIPT	tr|D1BLY4|D1BLY4_VEIPT UvrABC system protein B OS=Veillonella parvula (strain ATCC 10790 / DSM 2008 / CCUG 5123 / JCM 12972 / NCTC 11810 / Te3) OX=479436 GN=uvrB PE=3 SV=1	46	6009700	12064000	16	16	6	1	15	1	15	0	6	21.7	21.7	8.6	82.17	14.199	3	23	32
471	D1BP04|D1BP04	tr|D1BP04|D1BP04_VEIPT	tr|D1BP04|D1BP04_VEIPT Uncharacterized protein OS=Veillonella parvula (strain ATCC 10790 / DSM 2008 / CCUG 5123 / JCM 12972 / NCTC 11810 / Te3) OX=479436 GN=Vpar_1434 PE=3 SV=1	12	1145700	46185000	6	6	5	2	6	2	6	1	5	25.5	25.5	21.3	26.963	8.8725	1	21	33
472	D1BLY2|D1BLY2;E1LCE5|E1LCE5	tr|D1BLY2|D1BLY2_VEIPT;tr|E1LCE5|E1LCE5_9FIRM	tr|D1BLY2|D1BLY2_VEIPT Signal recognition particle receptor FtsY OS=Veillonella parvula (strain ATCC 10790 / DSM 2008 / CCUG 5123 / JCM 12972 / NCTC 11810 / Te3) OX=479436 GN=ftsY PE=3 SV=1;tr|E1LCE5|E1LCE5_9FIRM Signal recognition particle receptor FtsY O	20	15876000	63724000	13	13	13	6	13	6	13	6	13	51.8	51.8	51.8	33.786	60.959	4	44	58
473	D1BN52|D1BN52;E1L962|E1L962	tr|D1BN52|D1BN52_VEIPT	tr|D1BN52|D1BN52_VEIPT Cob(I)alamin adenosyltransferase OS=Veillonella parvula (strain ATCC 10790 / DSM 2008 / CCUG 5123 / JCM 12972 / NCTC 11810 / Te3) OX=479436 GN=Vpar_1128 PE=4 SV=1	13	2625700	17288000	6	6	6	2	5	2	5	2	5	31.1	31.1	31.1	19.93	12.424	0	9	13
474	D1BR66|D1BR66	tr|D1BR66|D1BR66_VEIPT	tr|D1BR66|D1BR66_VEIPT Uncharacterized protein OS=Veillonella parvula (strain ATCC 10790 / DSM 2008 / CCUG 5123 / JCM 12972 / NCTC 11810 / Te3) OX=479436 GN=Vpar_0345 PE=4 SV=1	14	7111300	79453000	8	8	5	3	8	3	8	0	5	36.8	36.8	24.1	24.772	27.95	4	35	39
475	D1BNK1|D1BNK1	tr|D1BNK1|D1BNK1_VEIPT	tr|D1BNK1|D1BNK1_VEIPT D-isomer specific 2-hydroxyacid dehydrogenase NAD-binding protein OS=Veillonella parvula (strain ATCC 10790 / DSM 2008 / CCUG 5123 / JCM 12972 / NCTC 11810 / Te3) OX=479436 GN=Vpar_1278 PE=3 SV=1	17	2457900	33984000	7	7	6	1	6	1	6	1	5	15.8	15.8	14	38.827	7.5445	0	6	11
476	E1LC31|E1LC31	tr|E1LC31|E1LC31_9FIRM	tr|E1LC31|E1LC31_9FIRM Alanine--tRNA ligase OS=Veillonella atypica ACS-134-V-Col7a OX=866778 GN=alaS PE=3 SV=1	53	32136000	20932000	26	8	8	19	19	6	1	6	1	35.1	8.6	8.6	95.134	48.401	48	81	189
477	E1LCK9|E1LCK9	tr|E1LCK9|E1LCK9_9FIRM	tr|E1LCK9|E1LCK9_9FIRM Transcriptional repressor NrdR OS=Veillonella atypica ACS-134-V-Col7a OX=866778 GN=nrdR PE=3 SV=1	11	263090000	80129000	10	10	3	10	7	10	7	3	0	61.8	61.8	24.8	18.364	87.969	236	70	335
478	E1LA55|E1LA55	tr|E1LA55|E1LA55_9FIRM	tr|E1LA55|E1LA55_9FIRM Efflux transporter, RND family, MFP subunit OS=Veillonella atypica ACS-134-V-Col7a OX=866778 GN=HMPREF9684_0188 PE=3 SV=1	12	363080000	43968000	7	6	6	7	3	6	2	6	2	22.9	19.8	19.8	37.072	112.45	66	0	66
479	D1BQ84|D1BQ84	tr|D1BQ84|D1BQ84_VEIPT	tr|D1BQ84|D1BQ84_VEIPT Amino acid permease-associated region OS=Veillonella parvula (strain ATCC 10790 / DSM 2008 / CCUG 5123 / JCM 12972 / NCTC 11810 / Te3) OX=479436 GN=Vpar_0008 PE=4 SV=1	9	120870000	21802000	6	6	3	3	5	3	5	0	3	9.3	9.3	6.5	53.88	14.897	17	22	58
480	E1LE36|E1LE36	tr|E1LE36|E1LE36_9FIRM	tr|E1LE36|E1LE36_9FIRM Holliday junction ATP-dependent DNA helicase RuvB OS=Veillonella atypica ACS-134-V-Col7a OX=866778 GN=ruvB PE=3 SV=1	19	35477000	15464000	8	3	3	8	4	3	0	3	0	23.4	8.4	8.4	37.035	2.5793	24	7	40
481	E1LDZ5|E1LDZ5;D1BP39|D1BP39	tr|E1LDZ5|E1LDZ5_9FIRM;tr|D1BP39|D1BP39_VEIPT	tr|E1LDZ5|E1LDZ5_9FIRM 50S ribosomal protein L36 OS=Veillonella atypica ACS-134-V-Col7a OX=866778 GN=rpmJ PE=3 SV=1;tr|D1BP39|D1BP39_VEIPT 50S ribosomal protein L36 OS=Veillonella parvula (strain ATCC 10790 / DSM 2008 / CCUG 5123 / JCM 12972 / NCTC 11810 /	2	114360000	291040000	1	1	1	1	1	1	1	1	1	24.3	24.3	24.3	4.3224	2.0224	3	6	13
482	E1LAM0|E1LAM0;D1BP78|D1BP78	tr|E1LAM0|E1LAM0_9FIRM;tr|D1BP78|D1BP78_VEIPT	tr|E1LAM0|E1LAM0_9FIRM 50S ribosomal protein L11 OS=Veillonella atypica ACS-134-V-Col7a OX=866778 GN=rplK PE=3 SV=1;tr|D1BP78|D1BP78_VEIPT 50S ribosomal protein L11 OS=Veillonella parvula (strain ATCC 10790 / DSM 2008 / CCUG 5123 / JCM 12972 / NCTC 11810 /	11	53596000	84456000	6	6	6	6	6	6	6	6	6	41.8	41.8	41.8	15.09	61.571	18	30	67
483	E1LB31|E1LB31	tr|E1LB31|E1LB31_9FIRM	tr|E1LB31|E1LB31_9FIRM Transporter, MotA/TolQ/ExbB proton channel family protein OS=Veillonella atypica ACS-134-V-Col7a OX=866778 GN=HMPREF9684_1570 PE=3 SV=1	7	187300000	3069000	6	6	5	6	1	6	1	5	0	28.6	28.6	23.2	22.315	28.725	106	13	122
484	D1BL49|D1BL49	tr|D1BL49|D1BL49_VEIPT	tr|D1BL49|D1BL49_VEIPT ABC transporter related protein OS=Veillonella parvula (strain ATCC 10790 / DSM 2008 / CCUG 5123 / JCM 12972 / NCTC 11810 / Te3) OX=479436 GN=Vpar_0422 PE=4 SV=1	17	17178000	72028000	10	10	8	2	10	2	10	0	8	37.6	37.6	29.3	38.19	78.591	16	71	115
485	D1BMB9|D1BMB9	tr|D1BMB9|D1BMB9_VEIPT	tr|D1BMB9|D1BMB9_VEIPT S-adenosylmethionine synthase OS=Veillonella parvula (strain ATCC 10790 / DSM 2008 / CCUG 5123 / JCM 12972 / NCTC 11810 / Te3) OX=479436 GN=metK PE=3 SV=1	21	56864000	53456000	15	15	6	8	14	8	14	1	6	43.9	43.9	19.4	43.26	71.794	151	115	311
486	D1BMX0|D1BMX0	tr|D1BMX0|D1BMX0_VEIPT	tr|D1BMX0|D1BMX0_VEIPT Bifunctional NAD(P)H-hydrate repair enzyme OS=Veillonella parvula (strain ATCC 10790 / DSM 2008 / CCUG 5123 / JCM 12972 / NCTC 11810 / Te3) OX=479436 GN=nnrE PE=3 SV=1	23	3124900	27128000	6	6	6	1	5	1	5	1	5	10.5	10.5	10.5	56.505	7.4882	35	35	106
487	D1BR16|D1BR16	tr|D1BR16|D1BR16_VEIPT	tr|D1BR16|D1BR16_VEIPT Phosphoglucosamine mutase OS=Veillonella parvula (strain ATCC 10790 / DSM 2008 / CCUG 5123 / JCM 12972 / NCTC 11810 / Te3) OX=479436 GN=glmM PE=3 SV=1	23	566210	52600000	16	16	7	4	15	4	15	1	6	30.7	30.7	10.9	48.067	41.024	3	53	60
488	E1LCZ1|E1LCZ1	tr|E1LCZ1|E1LCZ1_9FIRM	tr|E1LCZ1|E1LCZ1_9FIRM Histidine kinase OS=Veillonella atypica ACS-134-V-Col7a OX=866778 GN=HMPREF9684_0323 PE=4 SV=1	26	23142000	10473000	8	6	6	7	2	6	1	6	1	16.3	12.2	12.2	53.125	6.7333	13	3	19
489	E1LA27|E1LA27	tr|E1LA27|E1LA27_9FIRM	tr|E1LA27|E1LA27_9FIRM Lipoprotein OS=Veillonella atypica ACS-134-V-Col7a OX=866778 GN=HMPREF9684_1635 PE=3 SV=1	18	37786000	26201000	10	5	5	9	3	5	0	5	0	48.5	26.8	26.8	29.024	36.867	21	11	43
490	D1BNV3|D1BNV3;E1L9F6|E1L9F6	tr|D1BNV3|D1BNV3_VEIPT	tr|D1BNV3|D1BNV3_VEIPT Aldehyde Dehydrogenase OS=Veillonella parvula (strain ATCC 10790 / DSM 2008 / CCUG 5123 / JCM 12972 / NCTC 11810 / Te3) OX=479436 GN=Vpar_1382 PE=3 SV=1	36	6869100	9897700	9	9	9	2	9	2	9	2	9	18.6	18.6	18.6	53.86	7.8771	2	22	24
491	E1LBZ8|E1LBZ8	tr|E1LBZ8|E1LBZ8_9FIRM	tr|E1LBZ8|E1LBZ8_9FIRM Iron-only hydrogenase maturation rSAM protein HydG OS=Veillonella atypica ACS-134-V-Col7a OX=866778 GN=hydG PE=4 SV=1	28	44565000	21916000	17	8	8	16	9	8	0	8	0	35.6	16.9	16.9	53.375	36.573	41	51	103
492	D1BMD9|D1BMD9	tr|D1BMD9|D1BMD9_VEIPT	tr|D1BMD9|D1BMD9_VEIPT 4-hydroxy-3-methylbut-2-en-1-yl diphosphate synthase (flavodoxin) OS=Veillonella parvula (strain ATCC 10790 / DSM 2008 / CCUG 5123 / JCM 12972 / NCTC 11810 / Te3) OX=479436 GN=ispG PE=3 SV=1	21	20293000	68335000	17	8	8	8	16	0	8	0	8	63.7	30.7	30.7	38.633	57.05	46	65	204
493	D1BLH2|D1BLH2	tr|D1BLH2|D1BLH2_VEIPT	tr|D1BLH2|D1BLH2_VEIPT Lipid A biosynthesis acyltransferase OS=Veillonella parvula (strain ATCC 10790 / DSM 2008 / CCUG 5123 / JCM 12972 / NCTC 11810 / Te3) OX=479436 GN=Vpar_0546 PE=4 SV=1	17	4225800	77222000	12	12	10	2	9	2	9	2	9	38.4	38.4	29	35.235	91.203	0	42	86
494	E1LD77|E1LD77;D1BPD3|D1BPD3	tr|E1LD77|E1LD77_9FIRM;tr|D1BPD3|D1BPD3_VEIPT	tr|E1LD77|E1LD77_9FIRM ABC transporter, permease protein OS=Veillonella atypica ACS-134-V-Col7a OX=866778 GN=HMPREF9684_0921 PE=3 SV=1;tr|D1BPD3|D1BPD3_VEIPT Binding-protein-dependent transport systems inner membrane component OS=Veillonella parvula (strai	9	137170000	13515000	4	4	4	4	2	4	2	4	2	10.6	10.6	10.6	34.198	5.6853	19	6	42
495	E1LDU9|E1LDU9	tr|E1LDU9|E1LDU9_9FIRM	tr|E1LDU9|E1LDU9_9FIRM Periplasmic binding protein OS=Veillonella atypica ACS-134-V-Col7a OX=866778 GN=HMPREF9684_0053 PE=4 SV=1	20	84768000	23415000	12	8	8	11	4	8	1	8	1	34.8	23.4	23.4	36.956	57.052	64	12	108
496	E1L9K0|E1L9K0	tr|E1L9K0|E1L9K0_9FIRM	tr|E1L9K0|E1L9K0_9FIRM DNA gyrase subunit A OS=Veillonella atypica ACS-134-V-Col7a OX=866778 GN=gyrA PE=3 SV=1	54	5456900	24205000	14	14	2	11	10	11	10	2	0	14.9	14.9	2.7	91.68	12.364	13	34	54
497	D1BLT8|D1BLT8	tr|D1BLT8|D1BLT8_VEIPT	tr|D1BLT8|D1BLT8_VEIPT ABC transporter related protein OS=Veillonella parvula (strain ATCC 10790 / DSM 2008 / CCUG 5123 / JCM 12972 / NCTC 11810 / Te3) OX=479436 GN=Vpar_0662 PE=4 SV=1	38	21602000	21600000	9	7	7	3	8	1	7	1	7	13.8	10.8	10.8	72.843	8.6091	3	9	13
498	D1BPI3|D1BPI3;E1L9Z2|E1L9Z2	tr|D1BPI3|D1BPI3_VEIPT;tr|E1L9Z2|E1L9Z2_9FIRM	tr|D1BPI3|D1BPI3_VEIPT Bifunctional chorismate mutase/prephenate dehydratase OS=Veillonella parvula (strain ATCC 10790 / DSM 2008 / CCUG 5123 / JCM 12972 / NCTC 11810 / Te3) OX=479436 GN=Vpar_1614 PE=4 SV=1;tr|E1L9Z2|E1L9Z2_9FIRM Bifunctional chorismate mu	24	3552400	24837000	11	11	11	5	9	5	9	5	9	29	29	29	42.223	51.429	10	12	38
499	D1BL77|D1BL77	tr|D1BL77|D1BL77_VEIPT	tr|D1BL77|D1BL77_VEIPT YadA domain protein OS=Veillonella parvula (strain ATCC 10790 / DSM 2008 / CCUG 5123 / JCM 12972 / NCTC 11810 / Te3) OX=479436 GN=Vpar_0450 PE=3 SV=1	152	3255200	11456000	27	26	25	3	25	3	24	3	23	17.5	16.8	16.2	254.07	102.1	5	37	46
500	D1BLH3|D1BLH3	tr|D1BLH3|D1BLH3_VEIPT	tr|D1BLH3|D1BLH3_VEIPT Uncharacterized protein OS=Veillonella parvula (strain ATCC 10790 / DSM 2008 / CCUG 5123 / JCM 12972 / NCTC 11810 / Te3) OX=479436 GN=Vpar_0547 PE=4 SV=1	12	87549000	56395000	9	9	6	3	6	3	6	0	4	55.6	55.6	42.7	19.456	61.629	28	14	82
501	D1BP93|D1BP93;E1LAK5|E1LAK5	tr|D1BP93|D1BP93_VEIPT;tr|E1LAK5|E1LAK5_9FIRM	tr|D1BP93|D1BP93_VEIPT Hydroxylamine reductase OS=Veillonella parvula (strain ATCC 10790 / DSM 2008 / CCUG 5123 / JCM 12972 / NCTC 11810 / Te3) OX=479436 GN=hcp PE=3 SV=1;tr|E1LAK5|E1LAK5_9FIRM Hydroxylamine reductase OS=Veillonella atypica ACS-134-V-Col7a	30	3708200	47611000	17	17	17	4	16	4	16	4	16	40.1	40.1	40.1	57.168	181.62	3	55	71
502	E1LE32|E1LE32	tr|E1LE32|E1LE32_9FIRM	tr|E1LE32|E1LE32_9FIRM Preprotein translocase, YajC subunit OS=Veillonella atypica ACS-134-V-Col7a OX=866778 GN=yajC PE=3 SV=1	6	2320200000	30498000	7	7	7	7	2	7	2	7	2	53.1	53.1	53.1	11.038	61.915	171	8	179
503	D1BPP4|D1BPP4;E1LCX0|E1LCX0	tr|D1BPP4|D1BPP4_VEIPT;tr|E1LCX0|E1LCX0_9FIRM	tr|D1BPP4|D1BPP4_VEIPT Mg2 transporter protein CorA family protein OS=Veillonella parvula (strain ATCC 10790 / DSM 2008 / CCUG 5123 / JCM 12972 / NCTC 11810 / Te3) OX=479436 GN=Vpar_1675 PE=3 SV=1;tr|E1LCX0|E1LCX0_9FIRM CorA-like protein OS=Veillonella aty	14	39014000	99736000	11	11	11	6	10	6	10	6	10	33.1	33.1	33.1	36.746	82.839	7	33	100
504	E1LBA6|E1LBA6	tr|E1LBA6|E1LBA6_9FIRM	tr|E1LBA6|E1LBA6_9FIRM Uncharacterized protein OS=Veillonella atypica ACS-134-V-Col7a OX=866778 GN=HMPREF9684_1479 PE=4 SV=1	11	322230000	39070000	5	3	3	5	3	3	1	3	1	26.8	16.8	16.8	20.792	50.349	366	4	374
505	E1LCP6|E1LCP6	tr|E1LCP6|E1LCP6_9FIRM	tr|E1LCP6|E1LCP6_9FIRM Transcription termination/antitermination protein NusA OS=Veillonella atypica ACS-134-V-Col7a OX=866778 GN=nusA PE=3 SV=1	24	12473000	31003000	10	2	2	6	7	2	0	2	0	31.9	8.9	8.9	40.332	11.382	12	29	59
506	E1LAK3|E1LAK3	tr|E1LAK3|E1LAK3_9FIRM	tr|E1LAK3|E1LAK3_9FIRM Uncharacterized protein OS=Veillonella atypica ACS-134-V-Col7a OX=866778 GN=HMPREF9684_1063 PE=4 SV=1	29	97990000	11941000	14	14	11	14	6	14	6	11	3	30.6	30.6	25.5	59.482	199.09	112	3	118
507	D1BPL5|D1BPL5	tr|D1BPL5|D1BPL5_VEIPT	tr|D1BPL5|D1BPL5_VEIPT Lipoprotein OS=Veillonella parvula (strain ATCC 10790 / DSM 2008 / CCUG 5123 / JCM 12972 / NCTC 11810 / Te3) OX=479436 GN=Vpar_1646 PE=3 SV=1	18	30729000	51190000	13	13	8	6	10	6	10	2	7	57.7	57.7	36	29.127	161.72	10	36	105
508	E1LDT9|E1LDT9	tr|E1LDT9|E1LDT9_9FIRM	tr|E1LDT9|E1LDT9_9FIRM ATP synthase gamma chain OS=Veillonella atypica ACS-134-V-Col7a OX=866778 GN=atpG PE=3 SV=1	19	246330000	48169000	12	12	8	12	3	12	3	8	0	48.2	48.2	33.5	31.519	174.3	59	8	71
509	E1LDN8|E1LDN8;D1BQU9|D1BQU9	tr|E1LDN8|E1LDN8_9FIRM;tr|D1BQU9|D1BQU9_VEIPT	tr|E1LDN8|E1LDN8_9FIRM Respiratory nitrate reductase, gamma subunit OS=Veillonella atypica ACS-134-V-Col7a OX=866778 GN=narI PE=4 SV=1;tr|D1BQU9|D1BQU9_VEIPT Respiratory nitrate reductase, gamma subunit OS=Veillonella parvula (strain ATCC 10790 / DSM 2008	12	200230000	60173000	4	4	4	4	4	4	4	4	4	12.6	12.6	12.6	25.57	12.514	147	51	284
510	D1BR23|D1BR23	tr|D1BR23|D1BR23_VEIPT	tr|D1BR23|D1BR23_VEIPT Extracellular solute-binding protein family 3 OS=Veillonella parvula (strain ATCC 10790 / DSM 2008 / CCUG 5123 / JCM 12972 / NCTC 11810 / Te3) OX=479436 GN=Vpar_0302 PE=3 SV=1	19	55093000	59545000	12	12	8	4	10	4	10	1	6	50.4	50.4	34.1	29.32	134.38	44	36	203
511	E1LAR5|E1LAR5	tr|E1LAR5|E1LAR5_9FIRM	tr|E1LAR5|E1LAR5_9FIRM CBS domain protein OS=Veillonella atypica ACS-134-V-Col7a OX=866778 GN=HMPREF9684_0251 PE=3 SV=1	18	42811000	14701000	8	8	6	8	3	8	3	6	1	20.7	20.7	16.4	51.132	84.506	33	7	41
512	E1LCS4|E1LCS4	tr|E1LCS4|E1LCS4_9FIRM	tr|E1LCS4|E1LCS4_9FIRM Six-Cys-in-45 modification radical SAM protein OS=Veillonella atypica ACS-134-V-Col7a OX=866778 GN=HMPREF9684_1688 PE=3 SV=1	31	80900000	16706000	21	9	9	19	9	9	1	9	1	40.7	19	19	53.174	79.657	162	43	225
513	D1BMD8|D1BMD8	tr|D1BMD8|D1BMD8_VEIPT	tr|D1BMD8|D1BMD8_VEIPT Zinc metalloprotease OS=Veillonella parvula (strain ATCC 10790 / DSM 2008 / CCUG 5123 / JCM 12972 / NCTC 11810 / Te3) OX=479436 GN=Vpar_0864 PE=3 SV=1	14	2140400	116360000	8	8	8	2	8	2	8	2	8	25.4	25.4	25.4	36.497	82.375	0	40	104
514	D1BQ59|D1BQ59	tr|D1BQ59|D1BQ59_VEIPT	tr|D1BQ59|D1BQ59_VEIPT Uncharacterized protein OS=Veillonella parvula (strain ATCC 10790 / DSM 2008 / CCUG 5123 / JCM 12972 / NCTC 11810 / Te3) OX=479436 GN=Vpar_1842 PE=4 SV=1	21	14475000	38822000	13	13	13	2	11	2	11	2	11	42.4	42.4	42.4	42.725	144.66	4	42	85
515	D1BP06|D1BP06	tr|D1BP06|D1BP06_VEIPT	tr|D1BP06|D1BP06_VEIPT Ketol-acid reductoisomerase (NADP(+)) OS=Veillonella parvula (strain ATCC 10790 / DSM 2008 / CCUG 5123 / JCM 12972 / NCTC 11810 / Te3) OX=479436 GN=ilvC PE=3 SV=1	22	3802800	37698000	13	13	5	3	13	3	13	0	5	48.1	48.1	19.4	36.273	111.39	1	73	108
516	D1BKZ0|D1BKZ0	tr|D1BKZ0|D1BKZ0_VEIPT	tr|D1BKZ0|D1BKZ0_VEIPT Xanthine phosphoribosyltransferase OS=Veillonella parvula (strain ATCC 10790 / DSM 2008 / CCUG 5123 / JCM 12972 / NCTC 11810 / Te3) OX=479436 GN=xpt PE=3 SV=1	13	6324700	92377000	10	10	3	3	10	3	10	0	3	51.8	51.8	20.9	21.377	36.074	4	16	32
517	E1LAS9|E1LAS9	tr|E1LAS9|E1LAS9_9FIRM	tr|E1LAS9|E1LAS9_9FIRM Efflux transporter, RND family, MFP subunit OS=Veillonella atypica ACS-134-V-Col7a OX=866778 GN=HMPREF9684_0265 PE=3 SV=1	20	832680000	51844000	18	18	17	18	5	18	5	17	4	58.2	58.2	56.1	40.131	323.31	395	19	457
518	D1BLU1|D1BLU1	tr|D1BLU1|D1BLU1_VEIPT	tr|D1BLU1|D1BLU1_VEIPT Inner-membrane translocator OS=Veillonella parvula (strain ATCC 10790 / DSM 2008 / CCUG 5123 / JCM 12972 / NCTC 11810 / Te3) OX=479436 GN=Vpar_0665 PE=4 SV=1	8	81951000	24418000	3	2	2	1	3	0	2	0	2	6	4.2	4.2	36.426	9.7866	5	5	18
519	E1LBV4|E1LBV4	tr|E1LBV4|E1LBV4_9FIRM	tr|E1LBV4|E1LBV4_9FIRM ATP-dependent Clp protease ATP-binding subunit ClpX OS=Veillonella atypica ACS-134-V-Col7a OX=866778 GN=clpX PE=3 SV=1	26	34695000	59442000	14	6	6	12	8	6	0	6	0	36.5	17	17	46.15	17.046	76	39	135
520	E1LEG4|E1LEG4	tr|E1LEG4|E1LEG4_9FIRM	tr|E1LEG4|E1LEG4_9FIRM MazG family protein OS=Veillonella atypica ACS-134-V-Col7a OX=866778 GN=HMPREF9684_0122 PE=4 SV=1	18	82918000	30440000	8	8	7	8	2	8	2	7	1	37.5	37.5	34	29.821	26.565	22	1	24
521	E1LDM9|E1LDM9	tr|E1LDM9|E1LDM9_9FIRM	tr|E1LDM9|E1LDM9_9FIRM Transporter, anaerobic C4-dicarboxylate uptake (Dcu) family OS=Veillonella atypica ACS-134-V-Col7a OX=866778 GN=dcuA PE=3 SV=1	11	1079300000	6005300	7	3	3	7	4	3	1	3	1	13.5	7	7	47.034	35.835	293	11	365
522	D1BPQ2|D1BPQ2	tr|D1BPQ2|D1BPQ2_VEIPT	tr|D1BPQ2|D1BPQ2_VEIPT Cyclic-di-AMP phosphodiesterase OS=Veillonella parvula (strain ATCC 10790 / DSM 2008 / CCUG 5123 / JCM 12972 / NCTC 11810 / Te3) OX=479436 GN=Vpar_1683 PE=3 SV=1	35	34602000	26458000	23	23	16	10	18	10	18	3	12	39.7	39.7	28	75.2	244.44	100	66	298
523	E1LBJ3|E1LBJ3	tr|E1LBJ3|E1LBJ3_9FIRM	tr|E1LBJ3|E1LBJ3_9FIRM Dihydroxy-acid dehydratase OS=Veillonella atypica ACS-134-V-Col7a OX=866778 GN=ilvD PE=3 SV=1	26	619370	13488000	10	10	2	4	7	4	7	2	0	16.5	16.5	4	58.045	8.4686	4	7	19
524	D1BQU4|D1BQU4	tr|D1BQU4|D1BQU4_VEIPT	tr|D1BQU4|D1BQU4_VEIPT Major facilitator superfamily MFS_1 OS=Veillonella parvula (strain ATCC 10790 / DSM 2008 / CCUG 5123 / JCM 12972 / NCTC 11810 / Te3) OX=479436 GN=Vpar_0220 PE=3 SV=1	11	119790000	36775000	3	1	1	2	2	0	1	0	1	7.6	3.8	3.8	47.791	7.0115	7	10	36
525	D1BP11|D1BP11	tr|D1BP11|D1BP11_VEIPT	tr|D1BP11|D1BP11_VEIPT Dihydroxy-acid dehydratase OS=Veillonella parvula (strain ATCC 10790 / DSM 2008 / CCUG 5123 / JCM 12972 / NCTC 11810 / Te3) OX=479436 GN=ilvD PE=3 SV=1	25	644150	14027000	9	1	1	2	8	0	1	0	1	15.5	2.9	2.9	58.103	2.6371	2	8	18
526	E1LDP3|E1LDP3	tr|E1LDP3|E1LDP3_9FIRM	tr|E1LDP3|E1LDP3_9FIRM Transporter, major facilitator family protein OS=Veillonella atypica ACS-134-V-Col7a OX=866778 GN=HMPREF9684_1298 PE=3 SV=1	11	123800000	29695000	4	4	2	4	1	4	1	2	0	10.3	10.3	6.5	47.897	50.333	8	1	11
527	D1BQE9|D1BQE9	tr|D1BQE9|D1BQE9_VEIPT	tr|D1BQE9|D1BQE9_VEIPT Periplasmic binding protein OS=Veillonella parvula (strain ATCC 10790 / DSM 2008 / CCUG 5123 / JCM 12972 / NCTC 11810 / Te3) OX=479436 GN=Vpar_0073 PE=4 SV=1	13	4739800	58631000	7	7	6	2	7	2	7	1	6	33	33	30.4	32.591	137.21	1	22	31
528	D1BQD5|D1BQD5	tr|D1BQD5|D1BQD5_VEIPT	tr|D1BQD5|D1BQD5_VEIPT Biopolymer transport protein ExbD/TolR OS=Veillonella parvula (strain ATCC 10790 / DSM 2008 / CCUG 5123 / JCM 12972 / NCTC 11810 / Te3) OX=479436 GN=Vpar_0059 PE=3 SV=1	9	116970000	98525000	7	7	2	4	7	4	7	0	2	53.7	53.7	20.1	15.047	18.862	9	66	101
529	D1BMV5|D1BMV5	tr|D1BMV5|D1BMV5_VEIPT	tr|D1BMV5|D1BMV5_VEIPT FeS assembly ATPase SufC OS=Veillonella parvula (strain ATCC 10790 / DSM 2008 / CCUG 5123 / JCM 12972 / NCTC 11810 / Te3) OX=479436 GN=Vpar_1031 PE=3 SV=1	17	10889000	73232000	11	3	3	7	11	0	3	0	3	44.1	11.7	11.7	27.255	4.4658	9	39	57
530	E1LB30|E1LB30	tr|E1LB30|E1LB30_9FIRM	tr|E1LB30|E1LB30_9FIRM Transport energizing protein, ExbD/TolR family OS=Veillonella atypica ACS-134-V-Col7a OX=866778 GN=HMPREF9684_1569 PE=3 SV=1	9	159590000	73283000	7	2	2	6	5	2	0	2	0	53.7	20.1	20.1	15.109	10.422	39	10	52
531	E1LDP6|E1LDP6	tr|E1LDP6|E1LDP6_9FIRM	tr|E1LDP6|E1LDP6_9FIRM Anaerobic carbon-monoxide dehydrogenase OS=Veillonella atypica ACS-134-V-Col7a OX=866778 GN=cooS PE=4 SV=1	38	188270000	19759000	17	2	2	17	10	2	0	2	0	21.1	1.5	1.5	78.479	4.6726	219	26	250
532	D1BQF7|D1BQF7;E1LB04|E1LB04	tr|D1BQF7|D1BQF7_VEIPT	tr|D1BQF7|D1BQF7_VEIPT Short-chain dehydrogenase/reductase SDR OS=Veillonella parvula (strain ATCC 10790 / DSM 2008 / CCUG 5123 / JCM 12972 / NCTC 11810 / Te3) OX=479436 GN=Vpar_0081 PE=3 SV=1	14	914660	57818000	6	6	6	1	6	1	6	1	6	25	25	25	26.905	45.265	0	35	49
533	D1BNA0|D1BNA0	tr|D1BNA0|D1BNA0_VEIPT	tr|D1BNA0|D1BNA0_VEIPT Endolytic murein transglycosylase OS=Veillonella parvula (strain ATCC 10790 / DSM 2008 / CCUG 5123 / JCM 12972 / NCTC 11810 / Te3) OX=479436 GN=mltG PE=3 SV=1	22	1891700	59822000	12	12	10	2	12	2	12	1	10	32.5	32.5	28.5	52.115	54.558	3	42	101
534	D1BQ22|D1BQ22	tr|D1BQ22|D1BQ22_VEIPT	tr|D1BQ22|D1BQ22_VEIPT CRISPR system Cms endoribonuclease Csm3 OS=Veillonella parvula (strain ATCC 10790 / DSM 2008 / CCUG 5123 / JCM 12972 / NCTC 11810 / Te3) OX=479436 GN=Vpar_1804 PE=3 SV=1	16	7402800	42642000	9	9	9	4	8	4	8	4	8	40.5	40.5	40.5	25.455	17.337	11	27	38
535	D1BLF8|D1BLF8	tr|D1BLF8|D1BLF8_VEIPT	tr|D1BLF8|D1BLF8_VEIPT Lipid A biosynthesis acyltransferase OS=Veillonella parvula (strain ATCC 10790 / DSM 2008 / CCUG 5123 / JCM 12972 / NCTC 11810 / Te3) OX=479436 GN=Vpar_0532 PE=4 SV=1	16	30416000	39477000	10	7	7	4	9	1	6	1	6	29	21.3	21.3	34.714	42.411	62	43	132
536	D1BQ86|D1BQ86	tr|D1BQ86|D1BQ86_VEIPT	tr|D1BQ86|D1BQ86_VEIPT Acriflavin resistance protein OS=Veillonella parvula (strain ATCC 10790 / DSM 2008 / CCUG 5123 / JCM 12972 / NCTC 11810 / Te3) OX=479436 GN=Vpar_0010 PE=4 SV=1	57	18376000	33976000	27	27	17	13	25	13	25	3	17	25.5	25.5	17	113.04	219.45	33	84	160
537	D1BPH9|D1BPH9	tr|D1BPH9|D1BPH9_VEIPT	tr|D1BPH9|D1BPH9_VEIPT Phospho-2-dehydro-3-deoxyheptonate aldolase OS=Veillonella parvula (strain ATCC 10790 / DSM 2008 / CCUG 5123 / JCM 12972 / NCTC 11810 / Te3) OX=479436 GN=Vpar_1610 PE=4 SV=1	15	1896900	38617000	9	9	8	4	7	4	7	3	6	30.9	30.9	27.9	36.791	56.349	5	11	20
538	E1LDC9|E1LDC9	tr|E1LDC9|E1LDC9_9FIRM	tr|E1LDC9|E1LDC9_9FIRM GTPase Der OS=Veillonella atypica ACS-134-V-Col7a OX=866778 GN=der PE=3 SV=1	27	68352000	49379000	18	3	3	15	13	3	0	3	0	47.7	7.2	7.2	49.888	3.447	51	53	134
539	D1BMA6|D1BMA6	tr|D1BMA6|D1BMA6_VEIPT	tr|D1BMA6|D1BMA6_VEIPT GTPase Der OS=Veillonella parvula (strain ATCC 10790 / DSM 2008 / CCUG 5123 / JCM 12972 / NCTC 11810 / Te3) OX=479436 GN=der PE=3 SV=1	26	61920000	51278000	19	19	4	12	16	12	16	0	3	49.5	49.5	9	49.867	101.83	43	62	140
540	E1LC35|E1LC35	tr|E1LC35|E1LC35_9FIRM	tr|E1LC35|E1LC35_9FIRM Endolytic murein transglycosylase OS=Veillonella atypica ACS-134-V-Col7a OX=866778 GN=mltG PE=3 SV=1	21	10043000	34561000	7	5	5	6	3	5	1	5	1	18.7	14.7	14.7	50.271	102.14	22	16	56
541	D1BLT0|D1BLT0;E1LC92|E1LC92	tr|D1BLT0|D1BLT0_VEIPT	tr|D1BLT0|D1BLT0_VEIPT Cys-tRNA(Pro)/Cys-tRNA(Cys) deacylase OS=Veillonella parvula (strain ATCC 10790 / DSM 2008 / CCUG 5123 / JCM 12972 / NCTC 11810 / Te3) OX=479436 GN=Vpar_0654 PE=3 SV=1	10	6683800	42691000	5	5	5	1	5	1	5	1	5	36.2	36.2	36.2	18.318	10.026	0	28	39
542	D1BN36|D1BN36	tr|D1BN36|D1BN36_VEIPT	tr|D1BN36|D1BN36_VEIPT UDP-N-acetylmuramate--L-alanine ligase OS=Veillonella parvula (strain ATCC 10790 / DSM 2008 / CCUG 5123 / JCM 12972 / NCTC 11810 / Te3) OX=479436 GN=murC PE=3 SV=1	25	635820	33285000	18	18	12	4	18	4	18	1	12	46.3	46.3	34.6	50.182	81.699	1	123	164
543	D1BL53|D1BL53	tr|D1BL53|D1BL53_VEIPT	tr|D1BL53|D1BL53_VEIPT Short-chain dehydrogenase/reductase SDR OS=Veillonella parvula (strain ATCC 10790 / DSM 2008 / CCUG 5123 / JCM 12972 / NCTC 11810 / Te3) OX=479436 GN=Vpar_0426 PE=4 SV=1	13	19294000	35599000	6	4	4	3	4	1	3	1	3	29.8	18	18	26.998	15.946	18	7	29
544	D1BQ72|D1BQ72	tr|D1BQ72|D1BQ72_VEIPT	tr|D1BQ72|D1BQ72_VEIPT Single-stranded nucleic acid binding R3H domain protein OS=Veillonella parvula (strain ATCC 10790 / DSM 2008 / CCUG 5123 / JCM 12972 / NCTC 11810 / Te3) OX=479436 GN=Vpar_1855 PE=4 SV=1	16	19313000	26010000	12	12	9	3	11	3	11	1	8	43.4	43.4	32.8	29.383	68.872	8	59	98
545	E1LDS2|E1LDS2	tr|E1LDS2|E1LDS2_9FIRM	tr|E1LDS2|E1LDS2_9FIRM Glutamate dehydrogenase OS=Veillonella atypica ACS-134-V-Col7a OX=866778 GN=HMPREF9684_0987 PE=3 SV=1	24	219380000	18719000	18	18	11	18	8	18	8	11	2	49.8	49.8	33.3	46.148	178.24	134	18	177
546	D1BNB8|D1BNB8;E1LC17|E1LC17	tr|D1BNB8|D1BNB8_VEIPT;tr|E1LC17|E1LC17_9FIRM	tr|D1BNB8|D1BNB8_VEIPT RNA polymerase sigma factor SigA OS=Veillonella parvula (strain ATCC 10790 / DSM 2008 / CCUG 5123 / JCM 12972 / NCTC 11810 / Te3) OX=479436 GN=sigA PE=3 SV=1;tr|E1LC17|E1LC17_9FIRM RNA polymerase sigma factor SigA OS=Veillonella atyp	15	73537000	7145100	8	8	8	5	6	5	6	5	6	22	22	22	43.768	20.06	8	11	41
547	D1BM49|D1BM49;REV__D1BQE3|D1BQE3	tr|D1BM49|D1BM49_VEIPT	tr|D1BM49|D1BM49_VEIPT Adenine deaminase OS=Veillonella parvula (strain ATCC 10790 / DSM 2008 / CCUG 5123 / JCM 12972 / NCTC 11810 / Te3) OX=479436 GN=ade PE=3 SV=1	32	2253800	5943400	8	8	8	1	6	1	6	1	6	13.3	13.3	13.3	61.029	8.0661	1	7	13
548	D1BN13|D1BN13	tr|D1BN13|D1BN13_VEIPT	tr|D1BN13|D1BN13_VEIPT Phosphoglycerate kinase OS=Veillonella parvula (strain ATCC 10790 / DSM 2008 / CCUG 5123 / JCM 12972 / NCTC 11810 / Te3) OX=479436 GN=pgk PE=3 SV=1	27	15885000	28273000	16	9	9	8	15	1	8	1	8	44.4	23.2	23.2	41.351	20.544	55	96	203
549	D1BP92|D1BP92;E1LAK6|E1LAK6	tr|D1BP92|D1BP92_VEIPT	tr|D1BP92|D1BP92_VEIPT L-serine deaminase OS=Veillonella parvula (strain ATCC 10790 / DSM 2008 / CCUG 5123 / JCM 12972 / NCTC 11810 / Te3) OX=479436 GN=Vpar_1523 PE=3 SV=1	10	1777500	51611000	5	5	5	1	5	1	5	1	5	20.5	20.5	20.5	25.353	7.4197	0	20	37
550	D1BMX6|D1BMX6	tr|D1BMX6|D1BMX6_VEIPT	tr|D1BMX6|D1BMX6_VEIPT Phosphatidylserine decarboxylase proenzyme OS=Veillonella parvula (strain ATCC 10790 / DSM 2008 / CCUG 5123 / JCM 12972 / NCTC 11810 / Te3) OX=479436 GN=psd PE=3 SV=1	14	13497000	54841000	10	6	6	5	9	1	6	1	6	48.4	29.6	29.6	24.11	65.441	7	18	40
551	D1BMU5|D1BMU5	tr|D1BMU5|D1BMU5_VEIPT	tr|D1BMU5|D1BMU5_VEIPT ATPase AAA-2 domain protein OS=Veillonella parvula (strain ATCC 10790 / DSM 2008 / CCUG 5123 / JCM 12972 / NCTC 11810 / Te3) OX=479436 GN=Vpar_1021 PE=3 SV=1	45	2833900	20387000	21	21	11	7	17	7	17	0	9	26.1	26.1	14.5	89.626	34.435	7	37	59
552	E1LAU7|E1LAU7	tr|E1LAU7|E1LAU7_9FIRM	tr|E1LAU7|E1LAU7_9FIRM Negative regulator of genetic competence ClpC/MecB OS=Veillonella atypica ACS-134-V-Col7a OX=866778 GN=clpC PE=3 SV=1	47	5107200	9661900	14	4	4	11	9	4	1	4	1	16.3	4.7	4.7	89.399	6.1999	12	12	35
553	D1BPC8|D1BPC8;E1LD82|E1LD82	tr|D1BPC8|D1BPC8_VEIPT	tr|D1BPC8|D1BPC8_VEIPT Extracellular solute-binding protein family 5 OS=Veillonella parvula (strain ATCC 10790 / DSM 2008 / CCUG 5123 / JCM 12972 / NCTC 11810 / Te3) OX=479436 GN=Vpar_1559 PE=4 SV=1	27	860270	5982600	6	6	6	1	2	1	2	1	2	11.8	11.8	11.8	57.312	11.09	0	3	15
554	D1BKY8|D1BKY8	tr|D1BKY8|D1BKY8_VEIPT	tr|D1BKY8|D1BKY8_VEIPT Phosphoribosylformylglycinamidine synthase OS=Veillonella parvula (strain ATCC 10790 / DSM 2008 / CCUG 5123 / JCM 12972 / NCTC 11810 / Te3) OX=479436 GN=Vpar_0361 PE=4 SV=1	73	7766500	23834000	30	30	17	13	29	13	29	1	17	27.8	27.8	15.5	136.62	237.05	34	107	144
555	E1LBE2|E1LBE2	tr|E1LBE2|E1LBE2_9FIRM	tr|E1LBE2|E1LBE2_9FIRM Xanthine phosphoribosyltransferase OS=Veillonella atypica ACS-134-V-Col7a OX=866778 GN=xpt PE=3 SV=1	13	10199000	56596000	8	1	1	4	7	1	0	1	0	34.6	3.7	3.7	21.44	2.1796	5	13	24
556	D1BMZ4|D1BMZ4	tr|D1BMZ4|D1BMZ4_VEIPT	tr|D1BMZ4|D1BMZ4_VEIPT Uncharacterized protein OS=Veillonella parvula (strain ATCC 10790 / DSM 2008 / CCUG 5123 / JCM 12972 / NCTC 11810 / Te3) OX=479436 GN=Vpar_1070 PE=4 SV=1	17	18480000	51809000	9	9	6	3	8	3	8	1	6	20.8	20.8	12.7	43.55	67.784	5	18	78
557	E1LBE6|E1LBE6	tr|E1LBE6|E1LBE6_9FIRM	tr|E1LBE6|E1LBE6_9FIRM Phosphoribosylaminoimidazole-succinocarboxamide synthase OS=Veillonella atypica ACS-134-V-Col7a OX=866778 GN=purC PE=3 SV=1	21	118090000	24544000	15	3	3	12	10	3	0	3	0	44.6	8.7	8.7	27.669	2.7111	45	20	68
558	D1BN54|D1BN54;E1L964|E1L964	tr|D1BN54|D1BN54_VEIPT;tr|E1L964|E1L964_9FIRM	tr|D1BN54|D1BN54_VEIPT Cobalt-precorrin-2 C(20)-methyltransferase OS=Veillonella parvula (strain ATCC 10790 / DSM 2008 / CCUG 5123 / JCM 12972 / NCTC 11810 / Te3) OX=479436 GN=Vpar_1130 PE=3 SV=1;tr|E1L964|E1L964_9FIRM Cobalt-precorrin-2 C(20)-methyltransf	10	18639000	62828000	5	5	5	3	3	3	3	3	3	29.4	29.4	29.4	25.954	52.491	3	13	17
559	D1BL50|D1BL50	tr|D1BL50|D1BL50_VEIPT	tr|D1BL50|D1BL50_VEIPT Binding-protein-dependent transport systems inner membrane component OS=Veillonella parvula (strain ATCC 10790 / DSM 2008 / CCUG 5123 / JCM 12972 / NCTC 11810 / Te3) OX=479436 GN=Vpar_0423 PE=3 SV=1	7	133380000	54437000	3	3	2	1	3	1	3	0	2	12.9	12.9	9.7	22.95	28.762	2	25	43
560	D1BKZ4|D1BKZ4	tr|D1BKZ4|D1BKZ4_VEIPT	tr|D1BKZ4|D1BKZ4_VEIPT Phosphoribosylaminoimidazole-succinocarboxamide synthase OS=Veillonella parvula (strain ATCC 10790 / DSM 2008 / CCUG 5123 / JCM 12972 / NCTC 11810 / Te3) OX=479436 GN=purC PE=3 SV=1	19	65352000	35763000	15	15	3	10	12	10	12	1	2	46.3	46.3	10.3	27.536	20.25	45	22	72
561	D1BLU3|D1BLU3	tr|D1BLU3|D1BLU3_VEIPT	tr|D1BLU3|D1BLU3_VEIPT ABC transporter related protein OS=Veillonella parvula (strain ATCC 10790 / DSM 2008 / CCUG 5123 / JCM 12972 / NCTC 11810 / Te3) OX=479436 GN=Vpar_0667 PE=4 SV=1	14	8514900	90336000	12	12	6	3	12	3	12	0	6	53.8	53.8	25.8	25.817	267.57	9	84	93
562	D1BNF3|D1BNF3	tr|D1BNF3|D1BNF3_VEIPT	tr|D1BNF3|D1BNF3_VEIPT Uncharacterized protein OS=Veillonella parvula (strain ATCC 10790 / DSM 2008 / CCUG 5123 / JCM 12972 / NCTC 11810 / Te3) OX=479436 GN=Vpar_1230 PE=4 SV=1	13	1534700	36010000	8	8	8	3	7	3	7	3	7	37.4	37.4	37.4	24.291	33.862	0	40	84
563	D1BQ61|D1BQ61	tr|D1BQ61|D1BQ61_VEIPT	tr|D1BQ61|D1BQ61_VEIPT Peptidase M23 OS=Veillonella parvula (strain ATCC 10790 / DSM 2008 / CCUG 5123 / JCM 12972 / NCTC 11810 / Te3) OX=479436 GN=Vpar_1844 PE=4 SV=1	15	20311000	30535000	5	5	4	1	5	1	5	0	4	17.9	17.9	14.2	33.711	80.089	2	6	18
564	D1BN95|D1BN95	tr|D1BN95|D1BN95_VEIPT	tr|D1BN95|D1BN95_VEIPT Threonine--tRNA ligase OS=Veillonella parvula (strain ATCC 10790 / DSM 2008 / CCUG 5123 / JCM 12972 / NCTC 11810 / Te3) OX=479436 GN=thrS PE=3 SV=1	44	13144000	37330000	20	20	7	10	18	10	18	0	7	30.5	30.5	12.3	72.788	40.796	17	58	140
565	D1BQX3|D1BQX3	tr|D1BQX3|D1BQX3_VEIPT	tr|D1BQX3|D1BQX3_VEIPT D-isomer specific 2-hydroxyacid dehydrogenase NAD-binding protein OS=Veillonella parvula (strain ATCC 10790 / DSM 2008 / CCUG 5123 / JCM 12972 / NCTC 11810 / Te3) OX=479436 GN=Vpar_0250 PE=3 SV=1	15	1871900	35518000	7	7	3	1	7	1	7	0	3	22.5	22.5	7.3	34.515	15.551	0	25	26
566	E1LAB8|E1LAB8	tr|E1LAB8|E1LAB8_9FIRM	tr|E1LAB8|E1LAB8_9FIRM Cobyric acid synthase OS=Veillonella atypica ACS-134-V-Col7a OX=866778 GN=cobQ PE=3 SV=1	27	107160000	44012000	17	5	5	17	12	5	1	5	1	35.8	9.6	9.6	56.092	8.4334	167	111	328
567	D1BLI6|D1BLI6	tr|D1BLI6|D1BLI6_VEIPT	tr|D1BLI6|D1BLI6_VEIPT Putative gluconeogenesis factor OS=Veillonella parvula (strain ATCC 10790 / DSM 2008 / CCUG 5123 / JCM 12972 / NCTC 11810 / Te3) OX=479436 GN=Vpar_0560 PE=3 SV=1	16	3365900	28673000	9	9	8	2	9	2	9	1	8	22.5	22.5	20.3	49.151	26.903	7	52	108
568	E1LC40|E1LC40	tr|E1LC40|E1LC40_9FIRM	tr|E1LC40|E1LC40_9FIRM Threonine--tRNA ligase OS=Veillonella atypica ACS-134-V-Col7a OX=866778 GN=thrS PE=3 SV=1	44	14519000	31393000	16	3	3	13	12	3	1	3	1	23.1	4.9	4.9	72.895	3.8901	22	41	111
569	D1BLS0|D1BLS0	tr|D1BLS0|D1BLS0_VEIPT	tr|D1BLS0|D1BLS0_VEIPT Hydrogenase expression/formation protein HypE OS=Veillonella parvula (strain ATCC 10790 / DSM 2008 / CCUG 5123 / JCM 12972 / NCTC 11810 / Te3) OX=479436 GN=Vpar_0644 PE=3 SV=1	18	494900	56473000	11	11	11	1	11	1	11	1	11	40.9	40.9	40.9	35.856	45.553	0	46	54
570	E1L9T2|E1L9T2	tr|E1L9T2|E1L9T2_9FIRM	tr|E1L9T2|E1L9T2_9FIRM ABC transporter, substrate-binding protein, family 3 OS=Veillonella atypica ACS-134-V-Col7a OX=866778 GN=HMPREF9684_0828 PE=3 SV=1	19	76193000	22981000	9	5	5	8	5	5	1	5	1	42.2	25.9	25.9	29.41	201.02	89	11	162
571	D1BPQ0|D1BPQ0	tr|D1BPQ0|D1BPQ0_VEIPT	tr|D1BPQ0|D1BPQ0_VEIPT Replicative DNA helicase OS=Veillonella parvula (strain ATCC 10790 / DSM 2008 / CCUG 5123 / JCM 12972 / NCTC 11810 / Te3) OX=479436 GN=Vpar_1681 PE=3 SV=1	27	23737000	23211000	13	13	8	5	12	5	12	0	8	31.6	31.6	21.7	50.046	27.711	47	31	104
572	D1BMI1|D1BMI1	tr|D1BMI1|D1BMI1_VEIPT	tr|D1BMI1|D1BMI1_VEIPT Cobalamin biosynthesis protein CobD OS=Veillonella parvula (strain ATCC 10790 / DSM 2008 / CCUG 5123 / JCM 12972 / NCTC 11810 / Te3) OX=479436 GN=cobD PE=3 SV=1	18	23209000	27271000	9	9	6	3	9	3	9	0	6	23.9	23.9	13.9	37.469	96.824	7	19	52
573	D1BPF8|D1BPF8	tr|D1BPF8|D1BPF8_VEIPT	tr|D1BPF8|D1BPF8_VEIPT Uncharacterized protein OS=Veillonella parvula (strain ATCC 10790 / DSM 2008 / CCUG 5123 / JCM 12972 / NCTC 11810 / Te3) OX=479436 GN=Vpar_1589 PE=4 SV=1	20	1922500	68483000	15	15	15	4	13	4	13	4	13	51.3	51.3	51.3	33.052	277.77	0	35	215
574	E1LCK8|E1LCK8	tr|E1LCK8|E1LCK8_9FIRM	tr|E1LCK8|E1LCK8_9FIRM Pyruvate carboxylase OS=Veillonella atypica ACS-134-V-Col7a OX=866778 GN=pyc PE=4 SV=1	69	63016000	13124000	40	19	19	37	17	18	2	18	2	42.1	23.9	23.9	128.5	113.17	211	51	365
575	D1BNP6|D1BNP6	tr|D1BNP6|D1BNP6_VEIPT	tr|D1BNP6|D1BNP6_VEIPT 50S ribosomal subunit assembly factor BipA OS=Veillonella parvula (strain ATCC 10790 / DSM 2008 / CCUG 5123 / JCM 12972 / NCTC 11810 / Te3) OX=479436 GN=bipA PE=3 SV=1	30	40339000	30749000	20	2	2	16	18	0	2	0	2	32.3	3.6	3.6	67.498	-2	25	53	128
576	E1LED3|E1LED3	tr|E1LED3|E1LED3_9FIRM	tr|E1LED3|E1LED3_9FIRM 50S ribosomal subunit assembly factor BipA OS=Veillonella atypica ACS-134-V-Col7a OX=866778 GN=typA PE=3 SV=1	32	39090000	26016000	20	20	2	18	16	18	16	2	0	32.3	32.3	3.6	67.42	55.004	28	49	123
577	E1LDA2|E1LDA2	tr|E1LDA2|E1LDA2_9FIRM	tr|E1LDA2|E1LDA2_9FIRM Transketolase, thiamine diphosphate binding domain protein OS=Veillonella atypica ACS-134-V-Col7a OX=866778 GN=HMPREF9684_0147 PE=4 SV=1	16	99911000	11671000	9	9	6	9	3	9	3	6	0	38.5	38.5	24.8	30.172	49.148	63	4	72
578	D1BLH5|D1BLH5	tr|D1BLH5|D1BLH5_VEIPT	tr|D1BLH5|D1BLH5_VEIPT Lipopolysaccharide export system ATP-binding protein LptB OS=Veillonella parvula (strain ATCC 10790 / DSM 2008 / CCUG 5123 / JCM 12972 / NCTC 11810 / Te3) OX=479436 GN=Vpar_0549 PE=3 SV=1	16	5972900	47894000	10	10	6	4	10	4	10	0	6	46.4	46.4	26.4	26.327	79.091	5	43	63
579	E1LCA6|E1LCA6	tr|E1LCA6|E1LCA6_9FIRM	tr|E1LCA6|E1LCA6_9FIRM ABC transporter, ATP-binding protein OS=Veillonella atypica ACS-134-V-Col7a OX=866778 GN=HMPREF9684_1717 PE=4 SV=1	14	17357000	35840000	12	6	6	9	6	6	0	6	0	54.2	26.3	26.3	25.757	10.394	37	57	94
580	D1BQT3|D1BQT3	tr|D1BQT3|D1BQT3_VEIPT	tr|D1BQT3|D1BQT3_VEIPT Anaerobic carbon-monoxide dehydrogenase OS=Veillonella parvula (strain ATCC 10790 / DSM 2008 / CCUG 5123 / JCM 12972 / NCTC 11810 / Te3) OX=479436 GN=Vpar_0209 PE=4 SV=1	37	323770000	35692000	27	27	12	27	19	27	19	12	9	38.2	38.2	19.1	80.459	323.31	456	60	524
581	D1BKY9|D1BKY9	tr|D1BKY9|D1BKY9_VEIPT	tr|D1BKY9|D1BKY9_VEIPT Transcriptional regulator, LysR family OS=Veillonella parvula (strain ATCC 10790 / DSM 2008 / CCUG 5123 / JCM 12972 / NCTC 11810 / Te3) OX=479436 GN=Vpar_0362 PE=3 SV=1	22	66138000	35144000	12	12	7	5	11	5	11	0	7	41.9	41.9	24.9	33.477	45.178	14	44	126
582	D1BPE7|D1BPE7	tr|D1BPE7|D1BPE7_VEIPT	tr|D1BPE7|D1BPE7_VEIPT PTS system, fructose subfamily, IIC subunit OS=Veillonella parvula (strain ATCC 10790 / DSM 2008 / CCUG 5123 / JCM 12972 / NCTC 11810 / Te3) OX=479436 GN=Vpar_1578 PE=4 SV=1	28	143980000	44541000	16	8	8	10	13	2	7	2	7	25.8	13.9	13.9	69.105	20.311	41	52	111
583	E1L994|E1L994	tr|E1L994|E1L994_9FIRM	tr|E1L994|E1L994_9FIRM Efflux ABC transporter, permease protein OS=Veillonella atypica ACS-134-V-Col7a OX=866778 GN=HMPREF9684_0627 PE=4 SV=1	16	45165000	21922000	8	5	5	7	4	5	2	5	2	21.6	13.4	13.4	43.421	19.817	36	3	53
584	D1BLD7|D1BLD7	tr|D1BLD7|D1BLD7_VEIPT	tr|D1BLD7|D1BLD7_VEIPT Xanthine/uracil/vitamin C permease OS=Veillonella parvula (strain ATCC 10790 / DSM 2008 / CCUG 5123 / JCM 12972 / NCTC 11810 / Te3) OX=479436 GN=Vpar_0511 PE=3 SV=1	11	13107000	55561000	4	4	4	2	4	2	4	2	4	7.2	7.2	7.2	47.145	4.8642	0	10	20
585	D1BNU5|D1BNU5	tr|D1BNU5|D1BNU5_VEIPT	tr|D1BNU5|D1BNU5_VEIPT ATPase involved in DNA repair-like protein OS=Veillonella parvula (strain ATCC 10790 / DSM 2008 / CCUG 5123 / JCM 12972 / NCTC 11810 / Te3) OX=479436 GN=Vpar_1374 PE=4 SV=1	71	14645000	2953300	15	15	12	4	12	4	12	1	11	14.8	14.8	11.7	115.41	30.373	5	16	22
586	D1BQP1|D1BQP1	tr|D1BQP1|D1BQP1_VEIPT	tr|D1BQP1|D1BQP1_VEIPT Uncharacterized protein OS=Veillonella parvula (strain ATCC 10790 / DSM 2008 / CCUG 5123 / JCM 12972 / NCTC 11810 / Te3) OX=479436 GN=Vpar_0166 PE=4 SV=1	9	49040000	33693000	4	4	4	1	3	1	3	1	3	22.2	22.2	22.2	21.399	23.014	0	3	11
587	D1BM91|D1BM91	tr|D1BM91|D1BM91_VEIPT	tr|D1BM91|D1BM91_VEIPT Cell envelope-related transcriptional attenuator OS=Veillonella parvula (strain ATCC 10790 / DSM 2008 / CCUG 5123 / JCM 12972 / NCTC 11810 / Te3) OX=479436 GN=Vpar_0817 PE=3 SV=1	20	154780	49166000	10	10	10	1	9	1	9	1	9	33	33	33	42.408	107.06	1	17	41
588	D1BLU2|D1BLU2	tr|D1BLU2|D1BLU2_VEIPT	tr|D1BLU2|D1BLU2_VEIPT ABC transporter related protein OS=Veillonella parvula (strain ATCC 10790 / DSM 2008 / CCUG 5123 / JCM 12972 / NCTC 11810 / Te3) OX=479436 GN=Vpar_0666 PE=4 SV=1	14	22359000	90929000	10	10	2	6	10	6	10	1	2	41.5	41.5	11.9	27.541	118.05	26	55	104
589	D1BME2|D1BME2	tr|D1BME2|D1BME2_VEIPT	tr|D1BME2|D1BME2_VEIPT Uncharacterized protein OS=Veillonella parvula (strain ATCC 10790 / DSM 2008 / CCUG 5123 / JCM 12972 / NCTC 11810 / Te3) OX=479436 GN=Vpar_0868 PE=3 SV=1	18	117790000	38798000	8	3	3	5	6	0	3	0	3	27.8	13.7	13.7	32.997	14.433	43	15	71
590	D1BP89|D1BP89	tr|D1BP89|D1BP89_VEIPT	tr|D1BP89|D1BP89_VEIPT Penicillin-binding protein transpeptidase OS=Veillonella parvula (strain ATCC 10790 / DSM 2008 / CCUG 5123 / JCM 12972 / NCTC 11810 / Te3) OX=479436 GN=Vpar_1520 PE=3 SV=1	46	6390000	9152000	9	9	7	4	9	4	9	2	7	14.5	14.5	11.3	70.696	26.201	34	32	83
591	E1LE88|E1LE88	tr|E1LE88|E1LE88_9FIRM	tr|E1LE88|E1LE88_9FIRM 3-deoxy-D-manno-octulosonic acid transferase OS=Veillonella atypica ACS-134-V-Col7a OX=866778 GN=waaA PE=3 SV=1	32	39980000	7383100	13	13	11	9	4	9	4	8	2	33.6	33.6	30	49.46	15.498	42	13	61
592	E1LC07|E1LC07	tr|E1LC07|E1LC07_9FIRM	tr|E1LC07|E1LC07_9FIRM FtsK/SpoIIIE family protein OS=Veillonella atypica ACS-134-V-Col7a OX=866778 GN=HMPREF9684_0494 PE=3 SV=1	54	47789000	16004000	23	23	12	20	12	20	12	11	3	27.3	27.3	15.5	97.591	159.23	87	29	160
593	D1BNA6|D1BNA6	tr|D1BNA6|D1BNA6_VEIPT	tr|D1BNA6|D1BNA6_VEIPT Glycosyl transferase family 2 OS=Veillonella parvula (strain ATCC 10790 / DSM 2008 / CCUG 5123 / JCM 12972 / NCTC 11810 / Te3) OX=479436 GN=Vpar_1183 PE=4 SV=1	13	15047000	35085000	9	5	5	3	7	0	4	0	4	23.5	11.6	11.6	37.448	6.0902	13	17	47
594	D1BM79|D1BM79	tr|D1BM79|D1BM79_VEIPT	tr|D1BM79|D1BM79_VEIPT Transketolase domain protein OS=Veillonella parvula (strain ATCC 10790 / DSM 2008 / CCUG 5123 / JCM 12972 / NCTC 11810 / Te3) OX=479436 GN=Vpar_0805 PE=4 SV=1	16	42574000	54125000	9	6	6	4	8	1	5	1	5	34.5	20.9	20.9	30.036	7.7836	17	13	43
595	D1BL25|D1BL25	tr|D1BL25|D1BL25_VEIPT	tr|D1BL25|D1BL25_VEIPT Two component transcriptional regulator, winged helix family OS=Veillonella parvula (strain ATCC 10790 / DSM 2008 / CCUG 5123 / JCM 12972 / NCTC 11810 / Te3) OX=479436 GN=Vpar_0398 PE=4 SV=1	14	18813000	58624000	11	11	4	5	10	5	10	0	4	39.7	39.7	14.4	26.309	160.18	5	22	37
596	D1BL03|D1BL03	tr|D1BL03|D1BL03_VEIPT	tr|D1BL03|D1BL03_VEIPT 1,4-dihydroxy-2-naphthoyl-CoA synthase OS=Veillonella parvula (strain ATCC 10790 / DSM 2008 / CCUG 5123 / JCM 12972 / NCTC 11810 / Te3) OX=479436 GN=menB PE=3 SV=1	11	10656000	71410000	8	8	5	3	8	3	8	0	5	35	35	23.9	31.237	92.814	12	31	57
597	D1BR10|D1BR10	tr|D1BR10|D1BR10_VEIPT	tr|D1BR10|D1BR10_VEIPT Selenium-dependent molybdenum hydroxylase system protein, YqeB family OS=Veillonella parvula (strain ATCC 10790 / DSM 2008 / CCUG 5123 / JCM 12972 / NCTC 11810 / Te3) OX=479436 GN=Vpar_0289 PE=4 SV=1	20	363610	38695000	10	10	9	2	9	2	9	1	8	33.3	33.3	30.7	29.187	43.381	1	27	49
598	D1BQ24|D1BQ24	tr|D1BQ24|D1BQ24_VEIPT	tr|D1BQ24|D1BQ24_VEIPT CRISPR system single-strand-specific deoxyribonuclease Cas10/Csm1 (subtype III-A) OS=Veillonella parvula (strain ATCC 10790 / DSM 2008 / CCUG 5123 / JCM 12972 / NCTC 11810 / Te3) OX=479436 GN=Vpar_1806 PE=3 SV=1	52	7668100	14422000	24	24	24	8	18	8	18	8	18	29.9	29.9	29.9	95.777	108.23	69	36	111
599	D1BP91|D1BP91	tr|D1BP91|D1BP91_VEIPT	tr|D1BP91|D1BP91_VEIPT L-serine dehydratase OS=Veillonella parvula (strain ATCC 10790 / DSM 2008 / CCUG 5123 / JCM 12972 / NCTC 11810 / Te3) OX=479436 GN=Vpar_1522 PE=3 SV=1	15	6190400	36297000	9	9	8	1	9	1	9	0	8	43.1	43.1	40.7	30.361	27.649	3	18	23
600	D1BQG2|D1BQG2	tr|D1BQG2|D1BQG2_VEIPT	tr|D1BQG2|D1BQG2_VEIPT Extracellular solute-binding protein family 5 OS=Veillonella parvula (strain ATCC 10790 / DSM 2008 / CCUG 5123 / JCM 12972 / NCTC 11810 / Te3) OX=479436 GN=Vpar_0086 PE=4 SV=1	30	17809000	19614000	10	10	7	7	4	7	4	4	3	26	26	20.3	55.57	24.619	57	5	82
601	D1BLQ6|D1BLQ6	tr|D1BLQ6|D1BLQ6_VEIPT	tr|D1BLQ6|D1BLQ6_VEIPT DEAD/DEAH box helicase domain protein OS=Veillonella parvula (strain ATCC 10790 / DSM 2008 / CCUG 5123 / JCM 12972 / NCTC 11810 / Te3) OX=479436 GN=Vpar_0630 PE=4 SV=1	27	1937900	12503000	12	12	10	2	11	2	11	0	9	34.5	34.5	29.9	48.169	59.083	0	31	52
602	E1LBE1|E1LBE1	tr|E1LBE1|E1LBE1_9FIRM	tr|E1LBE1|E1LBE1_9FIRM LysR substrate binding domain protein OS=Veillonella atypica ACS-134-V-Col7a OX=866778 GN=lysR PE=3 SV=1	23	87907000	25959000	9	4	3	9	4	4	0	3	0	30.2	13.3	11.3	33.568	121.14	71	9	92
603	E1LCX4|E1LCX4	tr|E1LCX4|E1LCX4_9FIRM	tr|E1LCX4|E1LCX4_9FIRM Replicative DNA helicase OS=Veillonella atypica ACS-134-V-Col7a OX=866778 GN=dnaB PE=3 SV=1	26	66094000	16226000	11	6	6	11	5	6	1	6	1	23.6	13.7	13.7	50.382	28.369	89	11	120
604	D1BLM5|D1BLM5	tr|D1BLM5|D1BLM5_VEIPT	tr|D1BLM5|D1BLM5_VEIPT Protein-export membrane protein SecF OS=Veillonella parvula (strain ATCC 10790 / DSM 2008 / CCUG 5123 / JCM 12972 / NCTC 11810 / Te3) OX=479436 GN=secF PE=3 SV=1	10	864140	48789000	5	5	5	1	4	1	4	1	4	25.6	25.6	25.6	32.881	181.27	0	31	115
605	E1L9Q6|E1L9Q6	tr|E1L9Q6|E1L9Q6_9FIRM	tr|E1L9Q6|E1L9Q6_9FIRM ParB-like protein OS=Veillonella atypica ACS-134-V-Col7a OX=866778 GN=HMPREF9684_1519 PE=3 SV=1	20	269610000	11163000	22	22	15	20	10	20	10	15	3	76.2	76.2	57.8	34.106	323.31	326	54	426
606	D1BPB0|D1BPB0	tr|D1BPB0|D1BPB0_VEIPT	tr|D1BPB0|D1BPB0_VEIPT UDP-N-acetylglucosamine 2-epimerase OS=Veillonella parvula (strain ATCC 10790 / DSM 2008 / CCUG 5123 / JCM 12972 / NCTC 11810 / Te3) OX=479436 GN=Vpar_1541 PE=3 SV=1	21	18125000	20992000	12	12	7	6	9	6	9	1	7	38.9	38.9	26.6	42.254	89.608	4	16	35
607	E1L9T9|E1L9T9	tr|E1L9T9|E1L9T9_9FIRM	tr|E1L9T9|E1L9T9_9FIRM Molybdate ABC transporter, periplasmic molybdate-binding protein OS=Veillonella atypica ACS-134-V-Col7a OX=866778 GN=modA PE=3 SV=1	15	36133000	25337000	8	3	3	6	5	3	0	3	0	41.2	19.5	19.5	28.094	55.765	21	27	115
608	D1BNH2|D1BNH2	tr|D1BNH2|D1BNH2_VEIPT	tr|D1BNH2|D1BNH2_VEIPT Succinate CoA transferase OS=Veillonella parvula (strain ATCC 10790 / DSM 2008 / CCUG 5123 / JCM 12972 / NCTC 11810 / Te3) OX=479436 GN=Vpar_1249 PE=3 SV=1	29	68199000	47576000	22	11	11	13	18	2	10	2	10	44.3	23.2	23.2	54.562	49.073	106	57	213
609	E1LDT1|E1LDT1	tr|E1LDT1|E1LDT1_9FIRM	tr|E1LDT1|E1LDT1_9FIRM UDP-N-acetylglucosamine 2-epimerase OS=Veillonella atypica ACS-134-V-Col7a OX=866778 GN=HMPREF9684_0996 PE=3 SV=1	25	17490000	14231000	8	3	3	8	2	3	0	3	0	21.3	8.9	8.9	42.171	8.2032	7	6	20
610	E1L9H9|E1L9H9	tr|E1L9H9|E1L9H9_9FIRM	tr|E1L9H9|E1L9H9_9FIRM Pyruvate kinase OS=Veillonella atypica ACS-134-V-Col7a OX=866778 GN=pyk PE=3 SV=1	28	43758000	15824000	5	1	1	3	4	1	0	1	0	8.2	2.1	2.1	62.083	-2	5	4	13
611	E1LBF5|E1LBF5	tr|E1LBF5|E1LBF5_9FIRM	tr|E1LBF5|E1LBF5_9FIRM 1,4-dihydroxy-2-naphthoyl-CoA synthase OS=Veillonella atypica ACS-134-V-Col7a OX=866778 GN=menB PE=3 SV=1	11	19235000	36004000	6	3	3	5	4	2	1	2	1	23.2	12.1	12.1	31.196	9.3202	14	9	29
612	D1BKY7|D1BKY7	tr|D1BKY7|D1BKY7_VEIPT	tr|D1BKY7|D1BKY7_VEIPT Beta-lactamase domain protein OS=Veillonella parvula (strain ATCC 10790 / DSM 2008 / CCUG 5123 / JCM 12972 / NCTC 11810 / Te3) OX=479436 GN=Vpar_0360 PE=3 SV=1	30	7391800	31996000	14	14	9	9	13	9	13	4	8	32.6	32.6	21.9	47.29	22.706	8	34	49
613	D1BL75|D1BL75	tr|D1BL75|D1BL75_VEIPT	tr|D1BL75|D1BL75_VEIPT DNA methylase N-4/N-6 domain protein OS=Veillonella parvula (strain ATCC 10790 / DSM 2008 / CCUG 5123 / JCM 12972 / NCTC 11810 / Te3) OX=479436 GN=Vpar_0448 PE=3 SV=1	39	316240	25847000	19	19	19	2	18	2	18	2	18	32.4	32.4	32.4	74.718	38.878	1	73	74
614	E1LE49|E1LE49;D1BLK5|D1BLK5	tr|E1LE49|E1LE49_9FIRM;tr|D1BLK5|D1BLK5_VEIPT	tr|E1LE49|E1LE49_9FIRM Uncharacterized protein OS=Veillonella atypica ACS-134-V-Col7a OX=866778 GN=HMPREF9684_1114 PE=4 SV=1;tr|D1BLK5|D1BLK5_VEIPT Uncharacterized protein OS=Veillonella parvula (strain ATCC 10790 / DSM 2008 / CCUG 5123 / JCM 12972 / NCTC	12	139940000	8534500	6	6	6	2	5	2	5	2	5	32.6	32.6	32.6	14.998	3.6576	4	4	13
615	D1BQ53|D1BQ53	tr|D1BQ53|D1BQ53_VEIPT	tr|D1BQ53|D1BQ53_VEIPT Nitrite and sulphite reductase 4Fe-4S region OS=Veillonella parvula (strain ATCC 10790 / DSM 2008 / CCUG 5123 / JCM 12972 / NCTC 11810 / Te3) OX=479436 GN=Vpar_1836 PE=4 SV=1	22	4320900	59027000	14	14	9	3	13	3	13	0	9	46.2	46.2	34.6	34.586	71.413	3	50	61
616	D1BNC8|D1BNC8	tr|D1BNC8|D1BNC8_VEIPT	tr|D1BNC8|D1BNC8_VEIPT Cell divisionFtsK/SpoIIIE OS=Veillonella parvula (strain ATCC 10790 / DSM 2008 / CCUG 5123 / JCM 12972 / NCTC 11810 / Te3) OX=479436 GN=Vpar_1205 PE=3 SV=1	55	20808000	24314000	20	9	9	9	18	0	9	0	9	21.4	9.8	9.8	99.764	42.251	45	52	154
617	E1LEA7|E1LEA7	tr|E1LEA7|E1LEA7_9FIRM	tr|E1LEA7|E1LEA7_9FIRM SpoIVB peptidase S55 OS=Veillonella atypica ACS-134-V-Col7a OX=866778 GN=HMPREF9684_1173 PE=4 SV=1	41	40448000	8226600	19	13	13	17	8	13	2	13	2	26.1	19.4	19.4	74.228	156.51	65	61	187
618	D1BL91|D1BL91	tr|D1BL91|D1BL91_VEIPT	tr|D1BL91|D1BL91_VEIPT YadA domain protein OS=Veillonella parvula (strain ATCC 10790 / DSM 2008 / CCUG 5123 / JCM 12972 / NCTC 11810 / Te3) OX=479436 GN=Vpar_0464 PE=3 SV=1	153	290070	11371000	24	22	22	3	21	3	19	3	19	18.6	15.3	15.3	230.73	291.91	1	42	60
619	E1LCA0|E1LCA0	tr|E1LCA0|E1LCA0_9FIRM	tr|E1LCA0|E1LCA0_9FIRM ABC transporter, ATP-binding protein OS=Veillonella atypica ACS-134-V-Col7a OX=866778 GN=HMPREF9684_1712 PE=4 SV=1	39	41734000	16864000	19	19	17	19	2	19	2	17	1	36.4	36.4	33.4	72.601	40.114	63	2	65
620	E1LAH9|E1LAH9	tr|E1LAH9|E1LAH9_9FIRM	tr|E1LAH9|E1LAH9_9FIRM Uncharacterized protein OS=Veillonella atypica ACS-134-V-Col7a OX=866778 GN=HMPREF9684_1890 PE=3 SV=1	13	34504000	927680	8	2	2	7	5	2	0	2	0	42.6	12	12	24.183	24.133	43	6	52
621	E1LBV9|E1LBV9	tr|E1LBV9|E1LBV9_9FIRM	tr|E1LBV9|E1LBV9_9FIRM Valine--tRNA ligase OS=Veillonella atypica ACS-134-V-Col7a OX=866778 GN=valS PE=3 SV=1	47	1780500	17668000	14	3	3	6	11	3	0	3	0	16.5	3.8	3.8	101.99	2.9306	7	33	49
622	D1BQ93|D1BQ93	tr|D1BQ93|D1BQ93_VEIPT	tr|D1BQ93|D1BQ93_VEIPT Glycosyl transferase family 2 OS=Veillonella parvula (strain ATCC 10790 / DSM 2008 / CCUG 5123 / JCM 12972 / NCTC 11810 / Te3) OX=479436 GN=Vpar_0017 PE=4 SV=1	17	676200	50762000	9	9	9	1	8	1	8	1	8	43.3	43.3	43.3	29.415	33.499	0	26	54
623	E1L9N0|E1L9N0	tr|E1L9N0|E1L9N0_9FIRM	tr|E1L9N0|E1L9N0_9FIRM Uncharacterized protein OS=Veillonella atypica ACS-134-V-Col7a OX=866778 GN=HMPREF9684_1208 PE=3 SV=1	18	217620000	34000000	12	12	7	11	5	11	5	6	2	41.8	41.8	27.7	32.931	64.824	120	9	141
624	D1BLY1|D1BLY1	tr|D1BLY1|D1BLY1_VEIPT	tr|D1BLY1|D1BLY1_VEIPT Chromosome partition protein Smc OS=Veillonella parvula (strain ATCC 10790 / DSM 2008 / CCUG 5123 / JCM 12972 / NCTC 11810 / Te3) OX=479436 GN=smc PE=3 SV=1	77	6097200	8051400	24	15	15	8	18	1	11	1	11	19.4	11.4	11.4	134.16	18.141	30	32	78
625	D1BMA4|D1BMA4	tr|D1BMA4|D1BMA4_VEIPT	tr|D1BMA4|D1BMA4_VEIPT 1-acyl-sn-glycerol-3-phosphate acyltransferase OS=Veillonella parvula (strain ATCC 10790 / DSM 2008 / CCUG 5123 / JCM 12972 / NCTC 11810 / Te3) OX=479436 GN=Vpar_0830 PE=4 SV=1	16	21670000	30323000	11	7	7	4	11	1	7	1	7	43.2	25.2	25.2	23.22	7.8253	34	54	148
626	E1LCX6|E1LCX6	tr|E1LCX6|E1LCX6_9FIRM	tr|E1LCX6|E1LCX6_9FIRM Cyclic-di-AMP phosphodiesterase OS=Veillonella atypica ACS-134-V-Col7a OX=866778 GN=HMPREF9684_0308 PE=3 SV=1	37	50540000	7636400	15	8	8	15	6	8	0	8	0	25.7	14	14	74.812	66.733	111	17	184
627	E1LDS6|E1LDS6	tr|E1LDS6|E1LDS6_9FIRM	tr|E1LDS6|E1LDS6_9FIRM DUF2179 domain-containing protein OS=Veillonella atypica ACS-134-V-Col7a OX=866778 GN=HMPREF9684_0991 PE=4 SV=1	10	55030000	9162400	5	5	2	5	2	5	2	2	0	20.6	20.6	8.5	33.399	16.85	44	10	78
628	D1BMZ2|D1BMZ2	tr|D1BMZ2|D1BMZ2_VEIPT	tr|D1BMZ2|D1BMZ2_VEIPT Phenylalanine--tRNA ligase alpha subunit OS=Veillonella parvula (strain ATCC 10790 / DSM 2008 / CCUG 5123 / JCM 12972 / NCTC 11810 / Te3) OX=479436 GN=pheS PE=3 SV=1	25	27057000	17648000	13	13	6	8	11	8	11	1	6	30.6	30.6	17.1	38.706	50.784	22	26	71
629	D1BLD3|D1BLD3	tr|D1BLD3|D1BLD3_VEIPT	tr|D1BLD3|D1BLD3_VEIPT Type III pantothenate kinase OS=Veillonella parvula (strain ATCC 10790 / DSM 2008 / CCUG 5123 / JCM 12972 / NCTC 11810 / Te3) OX=479436 GN=coaX PE=3 SV=1	10	14141000	23095000	4	4	4	2	4	2	4	2	4	16.5	16.5	16.5	27.921	34.299	13	24	48
630	D1BLK2|D1BLK2	tr|D1BLK2|D1BLK2_VEIPT	tr|D1BLK2|D1BLK2_VEIPT Signal recognition particle protein OS=Veillonella parvula (strain ATCC 10790 / DSM 2008 / CCUG 5123 / JCM 12972 / NCTC 11810 / Te3) OX=479436 GN=ffh PE=3 SV=1	34	93205000	56701000	22	22	7	15	20	15	20	1	7	54.2	54.2	21.3	49.192	323.31	167	124	427
631	D1BQ77|D1BQ77	tr|D1BQ77|D1BQ77_VEIPT	tr|D1BQ77|D1BQ77_VEIPT Chromosomal replication initiator protein DnaA OS=Veillonella parvula (strain ATCC 10790 / DSM 2008 / CCUG 5123 / JCM 12972 / NCTC 11810 / Te3) OX=479436 GN=dnaA PE=3 SV=1	27	4082500	18132000	12	9	9	2	9	0	7	0	7	24.8	20.2	20.2	59.96	32.339	36	24	84
632	D1BMB5|D1BMB5;E1L9K5|E1L9K5	tr|D1BMB5|D1BMB5_VEIPT;tr|E1L9K5|E1L9K5_9FIRM	tr|D1BMB5|D1BMB5_VEIPT Guanylate kinase OS=Veillonella parvula (strain ATCC 10790 / DSM 2008 / CCUG 5123 / JCM 12972 / NCTC 11810 / Te3) OX=479436 GN=gmk PE=3 SV=1;tr|E1L9K5|E1L9K5_9FIRM Guanylate kinase OS=Veillonella atypica ACS-134-V-Col7a OX=866778 GN=	14	99928000	9302000	3	3	3	2	2	2	2	2	2	12.9	12.9	12.9	23.722	6.0609	10	5	17
633	D1BN33|D1BN33	tr|D1BN33|D1BN33_VEIPT	tr|D1BN33|D1BN33_VEIPT Uncharacterized protein OS=Veillonella parvula (strain ATCC 10790 / DSM 2008 / CCUG 5123 / JCM 12972 / NCTC 11810 / Te3) OX=479436 GN=Vpar_1109 PE=3 SV=1	20	19385000	38982000	9	4	4	5	9	1	4	1	4	33.8	16	16	25.303	34.867	2	22	37
634	D1BNI2|D1BNI2	tr|D1BNI2|D1BNI2_VEIPT	tr|D1BNI2|D1BNI2_VEIPT Trigger factor OS=Veillonella parvula (strain ATCC 10790 / DSM 2008 / CCUG 5123 / JCM 12972 / NCTC 11810 / Te3) OX=479436 GN=tig PE=3 SV=1	30	1964100	26342000	13	13	5	2	13	2	13	0	5	33.2	33.2	18	48.22	67.037	1	34	50
635	D1BM70|D1BM70	tr|D1BM70|D1BM70_VEIPT	tr|D1BM70|D1BM70_VEIPT Polar amino acid ABC transporter, inner membrane subunit OS=Veillonella parvula (strain ATCC 10790 / DSM 2008 / CCUG 5123 / JCM 12972 / NCTC 11810 / Te3) OX=479436 GN=Vpar_0796 PE=3 SV=1	10	21666000	61713000	6	6	5	1	5	1	5	0	4	29.8	29.8	26.6	24.017	35.527	1	28	67
636	E1LCD8|E1LCD8	tr|E1LCD8|E1LCD8_9FIRM	tr|E1LCD8|E1LCD8_9FIRM 3-oxoacyl-[acyl-carrier-protein] reductase OS=Veillonella atypica ACS-134-V-Col7a OX=866778 GN=fabG PE=3 SV=1	11	33728000	49022000	7	7	2	6	6	6	6	2	1	33.2	33.2	10.9	25.854	41.557	9	7	31
637	D1BQQ0|D1BQQ0	tr|D1BQQ0|D1BQQ0_VEIPT	tr|D1BQQ0|D1BQQ0_VEIPT Uncharacterized protein OS=Veillonella parvula (strain ATCC 10790 / DSM 2008 / CCUG 5123 / JCM 12972 / NCTC 11810 / Te3) OX=479436 GN=Vpar_0175 PE=4 SV=1	55	31419000	1987700	14	14	12	3	11	3	11	1	9	17.7	17.7	15.3	91.215	16.961	2	13	21
638	D1BP45|D1BP45	tr|D1BP45|D1BP45_VEIPT	tr|D1BP45|D1BP45_VEIPT 50S ribosomal protein L30 OS=Veillonella parvula (strain ATCC 10790 / DSM 2008 / CCUG 5123 / JCM 12972 / NCTC 11810 / Te3) OX=479436 GN=rpmD PE=3 SV=1	2	22491000	61972000	2	2	1	1	2	1	2	0	1	37.3	37.3	20.3	6.6188	2.5028	0	4	10
639	E1L9B4|E1L9B4	tr|E1L9B4|E1L9B4_9FIRM	tr|E1L9B4|E1L9B4_9FIRM Phosphoglycerate kinase OS=Veillonella atypica ACS-134-V-Col7a OX=866778 GN=pgk PE=3 SV=1	28	45423000	17868000	19	19	12	19	10	19	10	12	3	56.4	56.4	35.2	41.451	170.78	109	40	174
640	E1LBV2|E1LBV2	tr|E1LBV2|E1LBV2_9FIRM	tr|E1LBV2|E1LBV2_9FIRM Trigger factor OS=Veillonella atypica ACS-134-V-Col7a OX=866778 GN=tig PE=3 SV=1	30	4217800	19273000	9	1	1	3	8	1	0	1	0	21.2	3.2	3.2	48.102	3.5465	3	21	37
641	E1LBE0|E1LBE0	tr|E1LBE0|E1LBE0_9FIRM	tr|E1LBE0|E1LBE0_9FIRM Phosphoribosylformylglycinamidine synthase OS=Veillonella atypica ACS-134-V-Col7a OX=866778 GN=HMPREF9684_1412 PE=4 SV=1	74	23784000	12767000	28	15	15	27	13	15	1	15	1	25.3	13	13	137.02	81.799	82	34	119
642	E1LA87|E1LA87	tr|E1LA87|E1LA87_9FIRM	tr|E1LA87|E1LA87_9FIRM Alkyl hydroperoxide reductase C OS=Veillonella atypica ACS-134-V-Col7a OX=866778 GN=ahpC PE=3 SV=1	14	10448000	29385000	7	2	2	6	6	2	1	2	1	38	12.8	12.8	20.952	3.2938	7	13	22
643	D1BMZ6|D1BMZ6	tr|D1BMZ6|D1BMZ6_VEIPT	tr|D1BMZ6|D1BMZ6_VEIPT Efflux transporter, RND family, MFP subunit OS=Veillonella parvula (strain ATCC 10790 / DSM 2008 / CCUG 5123 / JCM 12972 / NCTC 11810 / Te3) OX=479436 GN=Vpar_1072 PE=3 SV=1	19	8541000	35301000	9	9	7	2	9	2	9	1	7	31.1	31.1	25.6	38.384	81.611	6	32	66
644	E1LCC5|E1LCC5	tr|E1LCC5|E1LCC5_9FIRM	tr|E1LCC5|E1LCC5_9FIRM Anaerobic ribonucleoside-triphosphate reductase OS=Veillonella atypica ACS-134-V-Col7a OX=866778 GN=nrdD PE=4 SV=1	40	69494000	9130400	30	30	13	28	12	28	12	13	1	43.2	43.2	22.1	81.836	148.48	162	58	235
645	E1LB44|E1LB44	tr|E1LB44|E1LB44_9FIRM	tr|E1LB44|E1LB44_9FIRM Hemagglutinin (Fragment) OS=Veillonella atypica ACS-134-V-Col7a OX=866778 GN=HMPREF9684_1219 PE=4 SV=1	139	238890	2107300	7	6	5	4	3	4	2	4	1	4.3	4.1	3.7	292.66	11.687	4	11	19
646	E1LDA8|E1LDA8	tr|E1LDA8|E1LDA8_9FIRM	tr|E1LDA8|E1LDA8_9FIRM GTPase Obg OS=Veillonella atypica ACS-134-V-Col7a OX=866778 GN=cgtA PE=3 SV=1	26	8952500	15524000	12	5	5	6	6	5	0	5	0	32.6	13.2	13.2	46.944	4.5222	6	13	39
647	E1L9D4|E1L9D4	tr|E1L9D4|E1L9D4_9FIRM	tr|E1L9D4|E1L9D4_9FIRM Uncharacterized protein OS=Veillonella atypica ACS-134-V-Col7a OX=866778 GN=HMPREF9684_0667 PE=3 SV=1	19	36206000	27185000	10	10	5	9	6	9	6	5	1	44.7	44.7	26.5	24.57	93.262	10	7	22
648	D1BPD6|D1BPD6;E1LD75|E1LD75	tr|D1BPD6|D1BPD6_VEIPT;tr|E1LD75|E1LD75_9FIRM	tr|D1BPD6|D1BPD6_VEIPT Argininosuccinate lyase OS=Veillonella parvula (strain ATCC 10790 / DSM 2008 / CCUG 5123 / JCM 12972 / NCTC 11810 / Te3) OX=479436 GN=argH PE=3 SV=1;tr|E1LD75|E1LD75_9FIRM Argininosuccinate lyase OS=Veillonella atypica ACS-134-V-Col7	31	3989600	7499700	6	6	6	4	6	4	6	4	6	11.8	11.8	11.8	52.78	8.8067	3	6	9
649	E1LE78|E1LE78	tr|E1LE78|E1LE78_9FIRM	tr|E1LE78|E1LE78_9FIRM Permease, YjgP/YjgQ family OS=Veillonella atypica ACS-134-V-Col7a OX=866778 GN=HMPREF9684_1144 PE=4 SV=1	19	77195000	5416900	9	9	4	9	4	9	4	4	0	24.2	24.2	11	40.559	89.516	50	24	130
650	D1BNC4|D1BNC4	tr|D1BNC4|D1BNC4_VEIPT	tr|D1BNC4|D1BNC4_VEIPT Ribosomal protein S12 methylthiotransferase RimO OS=Veillonella parvula (strain ATCC 10790 / DSM 2008 / CCUG 5123 / JCM 12972 / NCTC 11810 / Te3) OX=479436 GN=rimO PE=3 SV=1	24	17037000	16303000	14	14	9	8	9	8	9	3	6	34.8	34.8	22.1	50.228	38.902	21	21	85
651	D1BPK5|D1BPK5	tr|D1BPK5|D1BPK5_VEIPT	tr|D1BPK5|D1BPK5_VEIPT DNA polymerase III, subunits gamma and tau OS=Veillonella parvula (strain ATCC 10790 / DSM 2008 / CCUG 5123 / JCM 12972 / NCTC 11810 / Te3) OX=479436 GN=Vpar_1636 PE=3 SV=1	45	4491300	12330000	14	14	12	2	11	2	11	2	9	14.7	14.7	12.8	96.406	14.961	1	11	27
652	E1LCZ0|E1LCZ0	tr|E1LCZ0|E1LCZ0_9FIRM	tr|E1LCZ0|E1LCZ0_9FIRM Response regulator receiver domain protein OS=Veillonella atypica ACS-134-V-Col7a OX=866778 GN=HMPREF9684_0322 PE=4 SV=1	14	105230000	32810000	9	9	4	7	5	7	5	4	0	46	46	26.8	25.432	100.58	60	10	83
653	D1BQT7|D1BQT7	tr|D1BQT7|D1BQT7_VEIPT	tr|D1BQT7|D1BQT7_VEIPT Biotin synthase OS=Veillonella parvula (strain ATCC 10790 / DSM 2008 / CCUG 5123 / JCM 12972 / NCTC 11810 / Te3) OX=479436 GN=bioB PE=3 SV=1	24	174410000	10568000	15	10	10	9	6	4	4	4	4	58.5	45.3	45.3	37.886	175.38	286	9	413
654	E1LE52|E1LE52	tr|E1LE52|E1LE52_9FIRM	tr|E1LE52|E1LE52_9FIRM Signal recognition particle protein OS=Veillonella atypica ACS-134-V-Col7a OX=866778 GN=ffh PE=3 SV=1	35	99390000	31326000	22	7	7	21	14	7	1	7	1	50	17.1	17.1	49.211	69.009	171	88	370
655	D1BLX4|D1BLX4	tr|D1BLX4|D1BLX4_VEIPT	tr|D1BLX4|D1BLX4_VEIPT Malonyl CoA-acyl carrier protein transacylase OS=Veillonella parvula (strain ATCC 10790 / DSM 2008 / CCUG 5123 / JCM 12972 / NCTC 11810 / Te3) OX=479436 GN=Vpar_0698 PE=3 SV=1	18	22905000	28306000	14	14	3	7	11	7	11	0	3	50.5	50.5	13.1	33.678	35.284	27	29	100
656	D1BLF5|D1BLF5	tr|D1BLF5|D1BLF5_VEIPT	tr|D1BLF5|D1BLF5_VEIPT Uncharacterized protein OS=Veillonella parvula (strain ATCC 10790 / DSM 2008 / CCUG 5123 / JCM 12972 / NCTC 11810 / Te3) OX=479436 GN=Vpar_0529 PE=4 SV=1	18	10096000	40577000	9	8	8	2	9	1	8	1	8	29.4	26.6	26.6	36.53	61.248	8	20	49
657	E1LBI8|E1LBI8	tr|E1LBI8|E1LBI8_9FIRM	tr|E1LBI8|E1LBI8_9FIRM Ketol-acid reductoisomerase (NADP(+)) OS=Veillonella atypica ACS-134-V-Col7a OX=866778 GN=ilvC PE=3 SV=1	20	10417000	12754000	11	3	3	6	9	3	1	3	1	38.2	9.6	9.6	36.309	3.4037	4	35	50
658	D1BR07|D1BR07	tr|D1BR07|D1BR07_VEIPT	tr|D1BR07|D1BR07_VEIPT Aldehyde oxidase and xanthine dehydrogenase molybdopterin binding protein OS=Veillonella parvula (strain ATCC 10790 / DSM 2008 / CCUG 5123 / JCM 12972 / NCTC 11810 / Te3) OX=479436 GN=Vpar_0286 PE=4 SV=1	41	14985000	23511000	23	23	13	9	19	9	19	2	11	34.2	34.2	20.9	83.665	151.17	10	34	81
659	D1BM85|D1BM85	tr|D1BM85|D1BM85_VEIPT	tr|D1BM85|D1BM85_VEIPT GTPase Obg OS=Veillonella parvula (strain ATCC 10790 / DSM 2008 / CCUG 5123 / JCM 12972 / NCTC 11810 / Te3) OX=479436 GN=obg PE=3 SV=1	24	228500	30009000	13	13	6	1	11	1	11	0	5	33.1	33.1	13.7	46.836	30.198	1	37	77
660	D1BLF2|D1BLF2	tr|D1BLF2|D1BLF2_VEIPT	tr|D1BLF2|D1BLF2_VEIPT Uncharacterized protein OS=Veillonella parvula (strain ATCC 10790 / DSM 2008 / CCUG 5123 / JCM 12972 / NCTC 11810 / Te3) OX=479436 GN=Vpar_0526 PE=4 SV=1	74	3417500	17310000	33	33	33	4	27	4	27	4	27	26	26	26	153.33	96.311	0	87	139
661	D1BNH4|D1BNH4	tr|D1BNH4|D1BNH4_VEIPT	tr|D1BNH4|D1BNH4_VEIPT FolC bifunctional protein OS=Veillonella parvula (strain ATCC 10790 / DSM 2008 / CCUG 5123 / JCM 12972 / NCTC 11810 / Te3) OX=479436 GN=Vpar_1251 PE=3 SV=1	22	292780	21452000	9	9	9	1	9	1	9	1	9	25.1	25.1	25.1	47.458	113.19	0	24	27
662	E1LBW2|E1LBW2	tr|E1LBW2|E1LBW2_9FIRM	tr|E1LBW2|E1LBW2_9FIRM Succinate CoA transferase OS=Veillonella atypica ACS-134-V-Col7a OX=866778 GN=HMPREF9684_0448 PE=3 SV=1	30	103210000	19580000	25	25	14	25	8	25	8	14	0	49.2	49.2	28	54.492	208.91	293	25	339
663	E1L9H5|E1L9H5;D1BNX1|D1BNX1	tr|E1L9H5|E1L9H5_9FIRM;tr|D1BNX1|D1BNX1_VEIPT	tr|E1L9H5|E1L9H5_9FIRM Putative citrate (Pro-3S)-lyase, beta subunit OS=Veillonella atypica ACS-134-V-Col7a OX=866778 GN=HMPREF9684_0781 PE=4 SV=1;tr|D1BNX1|D1BNX1_VEIPT HpcH/HpaI aldolase OS=Veillonella parvula (strain ATCC 10790 / DSM 2008 / CCUG 5123 /	26	2340300	1607900	6	6	6	4	4	4	4	4	4	15.9	15.9	15.9	35.565	4.7797	1	3	12
664	E1LE81|E1LE81	tr|E1LE81|E1LE81_9FIRM	tr|E1LE81|E1LE81_9FIRM Uncharacterized protein OS=Veillonella atypica ACS-134-V-Col7a OX=866778 GN=HMPREF9684_1147 PE=4 SV=1	10	261810000	31859000	7	4	4	7	2	4	0	4	0	31.5	18.5	18.5	19.151	7.1758	53	9	70
665	E1LAS2|E1LAS2	tr|E1LAS2|E1LAS2_9FIRM	tr|E1LAS2|E1LAS2_9FIRM Aspartyl/glutamyl-tRNA(Asn/Gln) amidotransferase subunit B OS=Veillonella atypica ACS-134-V-Col7a OX=866778 GN=gatB PE=3 SV=1	33	24749000	12176000	13	4	4	12	8	4	0	4	0	33.4	12	12	53.134	7.1112	18	17	53
666	E1L9T3|E1L9T3	tr|E1L9T3|E1L9T3_9FIRM	tr|E1L9T3|E1L9T3_9FIRM ABC transporter, permease protein OS=Veillonella atypica ACS-134-V-Col7a OX=866778 GN=HMPREF9684_0829 PE=3 SV=1	12	69996000	30899000	4	2	2	4	2	2	1	2	1	22	8.7	8.7	24.631	2.8986	53	17	98
667	D1BLB3|D1BLB3	tr|D1BLB3|D1BLB3_VEIPT	tr|D1BLB3|D1BLB3_VEIPT Oligopeptide/dipeptide ABC transporter, ATPase subunit OS=Veillonella parvula (strain ATCC 10790 / DSM 2008 / CCUG 5123 / JCM 12972 / NCTC 11810 / Te3) OX=479436 GN=Vpar_0487 PE=4 SV=1	15	4893700	21987000	4	4	3	1	4	1	4	0	3	15.6	15.6	12.4	35.339	17.925	3	14	23
668	D1BR01|D1BR01	tr|D1BR01|D1BR01_VEIPT	tr|D1BR01|D1BR01_VEIPT MscS Mechanosensitive ion channel OS=Veillonella parvula (strain ATCC 10790 / DSM 2008 / CCUG 5123 / JCM 12972 / NCTC 11810 / Te3) OX=479436 GN=Vpar_0280 PE=3 SV=1	14	972130	7620500	3	3	3	1	2	1	2	1	2	9.7	9.7	9.7	35.451	6.2792	0	10	25
669	D1BMX7|D1BMX7	tr|D1BMX7|D1BMX7_VEIPT	tr|D1BMX7|D1BMX7_VEIPT N-acetylglucosaminyldiphosphoundecaprenol N-acetyl-beta-D-mannosaminyltransferase OS=Veillonella parvula (strain ATCC 10790 / DSM 2008 / CCUG 5123 / JCM 12972 / NCTC 11810 / Te3) OX=479436 GN=Vpar_1053 PE=3 SV=1	13	19701000	33223000	8	8	5	4	8	4	8	1	5	31.2	31.2	22.1	26.3	15.159	21	23	73
670	D1BP13|D1BP13	tr|D1BP13|D1BP13_VEIPT	tr|D1BP13|D1BP13_VEIPT Anion transporter OS=Veillonella parvula (strain ATCC 10790 / DSM 2008 / CCUG 5123 / JCM 12972 / NCTC 11810 / Te3) OX=479436 GN=Vpar_1443 PE=3 SV=1	15	4254500	27229000	6	6	2	2	4	2	4	0	2	11.1	11.1	4.5	50.541	7.3316	13	11	45
671	D1BPB1|D1BPB1	tr|D1BPB1|D1BPB1_VEIPT	tr|D1BPB1|D1BPB1_VEIPT Glycosyl transferase family 4 OS=Veillonella parvula (strain ATCC 10790 / DSM 2008 / CCUG 5123 / JCM 12972 / NCTC 11810 / Te3) OX=479436 GN=Vpar_1542 PE=4 SV=1	15	6994300	41175000	6	6	3	2	6	2	6	0	3	16.7	16.7	9.4	41.346	25.769	11	20	68
672	E1L9D8|E1L9D8	tr|E1L9D8|E1L9D8_9FIRM	tr|E1L9D8|E1L9D8_9FIRM UDP-N-acetylglucosamine--N-acetylmuramyl-(pentapeptide) pyrophosphoryl-undecaprenol N-acetylglucosamine transferase OS=Veillonella atypica ACS-134-V-Col7a OX=866778 GN=murG PE=3 SV=1	21	11698000	5545400	9	6	6	8	4	6	1	6	1	37.4	25.7	25.7	39.577	33.046	17	13	47
673	D1BMB1|D1BMB1;E1LDD4|E1LDD4	tr|D1BMB1|D1BMB1_VEIPT;tr|E1LDD4|E1LDD4_9FIRM	tr|D1BMB1|D1BMB1_VEIPT Uncharacterized protein OS=Veillonella parvula (strain ATCC 10790 / DSM 2008 / CCUG 5123 / JCM 12972 / NCTC 11810 / Te3) OX=479436 GN=Vpar_0837 PE=4 SV=1;tr|E1LDD4|E1LDD4_9FIRM Uncharacterized protein OS=Veillonella atypica ACS-134-V	11	12667000	41120000	6	6	6	4	5	4	5	4	5	33.5	33.5	33.5	17.781	5.0014	3	6	9
674	D1BQ94|D1BQ94	tr|D1BQ94|D1BQ94_VEIPT	tr|D1BQ94|D1BQ94_VEIPT Uncharacterized protein OS=Veillonella parvula (strain ATCC 10790 / DSM 2008 / CCUG 5123 / JCM 12972 / NCTC 11810 / Te3) OX=479436 GN=Vpar_0018 PE=4 SV=1	17	1423300	28589000	8	8	8	1	8	1	8	1	8	20.5	20.5	20.5	36.84	11.947	0	40	51
675	D1BLB5|D1BLB5	tr|D1BLB5|D1BLB5_VEIPT	tr|D1BLB5|D1BLB5_VEIPT Extracellular solute-binding protein family 5 OS=Veillonella parvula (strain ATCC 10790 / DSM 2008 / CCUG 5123 / JCM 12972 / NCTC 11810 / Te3) OX=479436 GN=Vpar_0489 PE=4 SV=1	29	2173400	43855000	19	19	17	4	15	4	15	2	15	43.5	43.5	39.2	60.397	196.3	1	72	177
676	E1LB75|E1LB75	tr|E1LB75|E1LB75_9FIRM	tr|E1LB75|E1LB75_9FIRM Response regulator receiver domain protein OS=Veillonella atypica ACS-134-V-Col7a OX=866778 GN=HMPREF9684_1447 PE=4 SV=1	14	39686000	13554000	10	3	3	8	6	3	0	3	0	39.7	14.4	14.4	26.191	81.113	13	9	24
677	E1L938|E1L938	tr|E1L938|E1L938_9FIRM	tr|E1L938|E1L938_9FIRM Phosphatidylserine decarboxylase proenzyme OS=Veillonella atypica ACS-134-V-Col7a OX=866778 GN=psd PE=3 SV=1	14	223230000	11428000	10	10	6	10	5	10	5	6	2	54	54	35.2	24.289	179.14	88	10	100
678	D1BL24|D1BL24	tr|D1BL24|D1BL24_VEIPT	tr|D1BL24|D1BL24_VEIPT Histidine kinase OS=Veillonella parvula (strain ATCC 10790 / DSM 2008 / CCUG 5123 / JCM 12972 / NCTC 11810 / Te3) OX=479436 GN=Vpar_0397 PE=4 SV=1	23	9900400	23294000	10	3	3	7	10	0	3	0	3	22.6	7.8	7.8	51.143	40.451	14	28	66
679	E1L9G5|E1L9G5	tr|E1L9G5|E1L9G5_9FIRM	tr|E1L9G5|E1L9G5_9FIRM LysR substrate binding domain protein OS=Veillonella atypica ACS-134-V-Col7a OX=866778 GN=lysR_1 PE=3 SV=1	22	12998000	11352000	7	1	1	6	4	1	0	1	0	23.5	3.9	3.9	34.813	1.8161	16	11	33
680	D1BMH7|D1BMH7	tr|D1BMH7|D1BMH7_VEIPT	tr|D1BMH7|D1BMH7_VEIPT Corrinoid adenosyltransferase OS=Veillonella parvula (strain ATCC 10790 / DSM 2008 / CCUG 5123 / JCM 12972 / NCTC 11810 / Te3) OX=479436 GN=Vpar_0903 PE=3 SV=1	11	9764300	28952000	8	8	6	2	8	2	8	0	6	55	55	39.8	19.157	192.37	2	22	82
681	E1LB74|E1LB74	tr|E1LB74|E1LB74_9FIRM	tr|E1LB74|E1LB74_9FIRM Histidine kinase OS=Veillonella atypica ACS-134-V-Col7a OX=866778 GN=HMPREF9684_1446 PE=4 SV=1	24	17280000	18205000	11	11	4	11	7	11	7	4	0	23.3	23.3	8.5	51.217	28.121	25	22	65
682	D1BQD4|D1BQD4	tr|D1BQD4|D1BQD4_VEIPT	tr|D1BQD4|D1BQD4_VEIPT MotA/TolQ/ExbB proton channel OS=Veillonella parvula (strain ATCC 10790 / DSM 2008 / CCUG 5123 / JCM 12972 / NCTC 11810 / Te3) OX=479436 GN=Vpar_0058 PE=3 SV=1	8	2350400	60540000	5	4	4	3	5	2	4	2	4	34	28.6	28.6	22.23	193.05	38	144	290
683	D1BNW2|D1BNW2	tr|D1BNW2|D1BNW2_VEIPT	tr|D1BNW2|D1BNW2_VEIPT Transcriptional regulator, LysR family OS=Veillonella parvula (strain ATCC 10790 / DSM 2008 / CCUG 5123 / JCM 12972 / NCTC 11810 / Te3) OX=479436 GN=Vpar_1391 PE=3 SV=1	22	12998000	13078000	9	9	3	6	5	6	5	1	1	28.3	28.3	8.8	34.918	13.404	14	15	39
684	D1BQ64|D1BQ64	tr|D1BQ64|D1BQ64_VEIPT	tr|D1BQ64|D1BQ64_VEIPT ParB-like partition protein OS=Veillonella parvula (strain ATCC 10790 / DSM 2008 / CCUG 5123 / JCM 12972 / NCTC 11810 / Te3) OX=479436 GN=Vpar_1847 PE=3 SV=1	24	34766000	54467000	19	12	12	6	17	1	10	1	10	60.2	42.1	42.1	34.464	268.39	212	80	363
685	E1LCD7|E1LCD7	tr|E1LCD7|E1LCD7_9FIRM	tr|E1LCD7|E1LCD7_9FIRM Malonyl CoA-acyl carrier protein transacylase OS=Veillonella atypica ACS-134-V-Col7a OX=866778 GN=fabD PE=3 SV=1	19	54235000	16625000	14	3	3	10	8	3	0	3	0	48.2	10.9	10.9	33.774	6.1237	43	21	91
686	E1LD66|E1LD66	tr|E1LD66|E1LD66_9FIRM	tr|E1LD66|E1LD66_9FIRM Phosphoenolpyruvate-dependent sugar phosphotransferase system, EIIA 2 OS=Veillonella atypica ACS-134-V-Col7a OX=866778 GN=HMPREF9684_0909 PE=4 SV=1	31	258370000	7027500	18	18	10	17	7	17	7	9	1	34.9	34.9	22.9	68.829	323.31	361	7	517
687	D1BMS5|D1BMS5	tr|D1BMS5|D1BMS5_VEIPT	tr|D1BMS5|D1BMS5_VEIPT Inorganic diphosphatase OS=Veillonella parvula (strain ATCC 10790 / DSM 2008 / CCUG 5123 / JCM 12972 / NCTC 11810 / Te3) OX=479436 GN=Vpar_1001 PE=4 SV=1	17	612980	30623000	10	10	6	1	8	1	8	1	5	36.7	36.7	26.2	34.204	72.955	0	23	51
688	D1BPL6|D1BPL6	tr|D1BPL6|D1BPL6_VEIPT	tr|D1BPL6|D1BPL6_VEIPT Nitroreductase OS=Veillonella parvula (strain ATCC 10790 / DSM 2008 / CCUG 5123 / JCM 12972 / NCTC 11810 / Te3) OX=479436 GN=Vpar_1647 PE=4 SV=1	14	13550000	18739000	9	9	3	4	7	4	7	0	3	31.4	31.4	13.3	29.977	7.8849	3	8	21
689	D1BN37|D1BN37	tr|D1BN37|D1BN37_VEIPT	tr|D1BN37|D1BN37_VEIPT UDP-N-acetylglucosamine--N-acetylmuramyl-(pentapeptide) pyrophosphoryl-undecaprenol N-acetylglucosamine transferase OS=Veillonella parvula (strain ATCC 10790 / DSM 2008 / CCUG 5123 / JCM 12972 / NCTC 11810 / Te3) OX=479436 GN=murG PE	24	910950	43264000	16	16	13	3	15	3	15	1	12	52.8	52.8	41.2	39.347	52.952	4	65	120
690	D1BPD7|D1BPD7;E1LD74|E1LD74	tr|D1BPD7|D1BPD7_VEIPT;tr|E1LD74|E1LD74_9FIRM	tr|D1BPD7|D1BPD7_VEIPT Argininosuccinate synthase OS=Veillonella parvula (strain ATCC 10790 / DSM 2008 / CCUG 5123 / JCM 12972 / NCTC 11810 / Te3) OX=479436 GN=argG PE=3 SV=1;tr|E1LD74|E1LD74_9FIRM Argininosuccinate synthase OS=Veillonella atypica ACS-134-	25	8473300	24517000	14	14	14	7	14	7	14	7	14	32.5	32.5	32.5	44.419	69.918	11	70	94
691	D1BPB8|D1BPB8	tr|D1BPB8|D1BPB8_VEIPT	tr|D1BPB8|D1BPB8_VEIPT Amino acid carrier protein OS=Veillonella parvula (strain ATCC 10790 / DSM 2008 / CCUG 5123 / JCM 12972 / NCTC 11810 / Te3) OX=479436 GN=Vpar_1549 PE=3 SV=1	7	29293000	38822000	4	4	2	1	3	1	3	0	2	9.3	9.3	4.5	52.288	17.37	4	9	42
692	D1BM78|D1BM78	tr|D1BM78|D1BM78_VEIPT	tr|D1BM78|D1BM78_VEIPT Polysaccharide pyruvyl transferase OS=Veillonella parvula (strain ATCC 10790 / DSM 2008 / CCUG 5123 / JCM 12972 / NCTC 11810 / Te3) OX=479436 GN=Vpar_0804 PE=4 SV=1	19	454750	20219000	9	9	9	1	9	1	9	1	9	21	21	21	40.327	48.975	0	29	49
693	D1BM54|D1BM54	tr|D1BM54|D1BM54_VEIPT	tr|D1BM54|D1BM54_VEIPT Lytic transglycosylase catalytic OS=Veillonella parvula (strain ATCC 10790 / DSM 2008 / CCUG 5123 / JCM 12972 / NCTC 11810 / Te3) OX=479436 GN=Vpar_0780 PE=4 SV=1	11	4200700	43257000	5	5	4	2	5	2	5	1	4	37.5	37.5	26.1	20.934	154	1	6	12
694	E1LAB9|E1LAB9	tr|E1LAB9|E1LAB9_9FIRM	tr|E1LAB9|E1LAB9_9FIRM Cobalamin biosynthesis protein CobD OS=Veillonella atypica ACS-134-V-Col7a OX=866778 GN=cobD PE=3 SV=1	16	58477000	14412000	7	4	4	7	4	4	1	4	1	20.3	10.3	10.3	37.741	4.6285	76	6	94
695	D1BN61|D1BN61	tr|D1BN61|D1BN61_VEIPT	tr|D1BN61|D1BN61_VEIPT ABC transporter related protein OS=Veillonella parvula (strain ATCC 10790 / DSM 2008 / CCUG 5123 / JCM 12972 / NCTC 11810 / Te3) OX=479436 GN=Vpar_1137 PE=4 SV=1	18	1624600	16811000	7	7	5	2	7	2	7	0	5	31.5	31.5	21.9	29.766	33.893	3	27	45
696	D1BPJ9|D1BPJ9	tr|D1BPJ9|D1BPJ9_VEIPT	tr|D1BPJ9|D1BPJ9_VEIPT Cation diffusion facilitator family transporter OS=Veillonella parvula (strain ATCC 10790 / DSM 2008 / CCUG 5123 / JCM 12972 / NCTC 11810 / Te3) OX=479436 GN=Vpar_1630 PE=4 SV=1	15	1397800	21400000	5	5	3	2	4	2	4	1	2	13.4	13.4	9.1	40.887	53.575	1	9	26
697	D1BNU9|D1BNU9	tr|D1BNU9|D1BNU9_VEIPT	tr|D1BNU9|D1BNU9_VEIPT DEAD/DEAH box helicase domain protein OS=Veillonella parvula (strain ATCC 10790 / DSM 2008 / CCUG 5123 / JCM 12972 / NCTC 11810 / Te3) OX=479436 GN=Vpar_1378 PE=3 SV=1	28	3560700	11355000	18	18	8	6	17	6	17	0	7	44.1	44.1	19	58.917	102.35	14	38	81
698	E1LCC9|E1LCC9	tr|E1LCC9|E1LCC9_9FIRM	tr|E1LCC9|E1LCC9_9FIRM Putative enoyl-[acyl-carrier-protein] reductase II OS=Veillonella atypica ACS-134-V-Col7a OX=866778 GN=HMPREF9684_1740 PE=4 SV=1	15	15491000	19076000	5	2	2	4	3	2	0	2	0	17	6.3	6.3	33.621	3.343	8	6	26
699	D1BNH9|D1BNH9	tr|D1BNH9|D1BNH9_VEIPT	tr|D1BNH9|D1BNH9_VEIPT Lon protease OS=Veillonella parvula (strain ATCC 10790 / DSM 2008 / CCUG 5123 / JCM 12972 / NCTC 11810 / Te3) OX=479436 GN=lon PE=2 SV=1	47	20385000	24036000	35	35	17	15	26	15	26	2	12	45.3	45.3	25	85.781	113.61	38	42	224
700	E1LE95|E1LE95	tr|E1LE95|E1LE95_9FIRM	tr|E1LE95|E1LE95_9FIRM Putative lipid A biosynthesis lauroyl acyltransferase OS=Veillonella atypica ACS-134-V-Col7a OX=866778 GN=HMPREF9684_1161 PE=4 SV=1	14	97261000	20596000	10	10	7	10	4	10	4	7	1	27.3	27.3	19.7	34.499	28.114	110	23	147
701	D1BLH9|D1BLH9	tr|D1BLH9|D1BLH9_VEIPT	tr|D1BLH9|D1BLH9_VEIPT DUF2179 domain-containing protein OS=Veillonella parvula (strain ATCC 10790 / DSM 2008 / CCUG 5123 / JCM 12972 / NCTC 11810 / Te3) OX=479436 GN=Vpar_0553 PE=4 SV=1	11	1847800	18848000	5	5	5	1	3	1	3	1	3	18.7	18.7	18.7	31.496	47.584	0	18	51
702	D1BNE6|D1BNE6	tr|D1BNE6|D1BNE6_VEIPT	tr|D1BNE6|D1BNE6_VEIPT Cobyrinic acid ac-diamide synthase OS=Veillonella parvula (strain ATCC 10790 / DSM 2008 / CCUG 5123 / JCM 12972 / NCTC 11810 / Te3) OX=479436 GN=Vpar_1223 PE=4 SV=1	18	2772700	26866000	7	6	6	1	7	0	6	0	6	20.5	16.9	16.9	34.184	7.2029	8	31	45
703	D1BL26|D1BL26	tr|D1BL26|D1BL26_VEIPT	tr|D1BL26|D1BL26_VEIPT Peptidase S1 and S6 chymotrypsin/Hap OS=Veillonella parvula (strain ATCC 10790 / DSM 2008 / CCUG 5123 / JCM 12972 / NCTC 11810 / Te3) OX=479436 GN=Vpar_0399 PE=3 SV=1	13	26083000	45930000	7	5	5	2	7	0	5	0	5	26.3	20.3	20.3	38.14	74.251	12	51	104
704	D1BMS0|D1BMS0	tr|D1BMS0|D1BMS0_VEIPT	tr|D1BMS0|D1BMS0_VEIPT Aspartyl/glutamyl-tRNA(Asn/Gln) amidotransferase subunit B OS=Veillonella parvula (strain ATCC 10790 / DSM 2008 / CCUG 5123 / JCM 12972 / NCTC 11810 / Te3) OX=479436 GN=gatB PE=3 SV=1	36	12387000	20679000	17	17	8	8	16	8	16	0	8	39	39	17.6	53.215	80.176	12	28	73
705	E1LC08|E1LC08	tr|E1LC08|E1LC08_9FIRM	tr|E1LC08|E1LC08_9FIRM Uncharacterized protein OS=Veillonella atypica ACS-134-V-Col7a OX=866778 GN=HMPREF9684_0495 PE=4 SV=1	9	46357000	15249000	7	7	4	7	4	7	4	4	1	48.7	48.7	38.7	17.889	48.446	19	4	25
706	E1LAE7|E1LAE7	tr|E1LAE7|E1LAE7_9FIRM	tr|E1LAE7|E1LAE7_9FIRM ABC transporter, ATP-binding protein OS=Veillonella atypica ACS-134-V-Col7a OX=866778 GN=HMPREF9684_1902 PE=4 SV=1	17	4318000	4684300	4	3	3	4	1	3	0	3	0	15.2	12.1	12.1	35.603	4.6087	8	1	11
707	D1BQ57|D1BQ57;E1L9R3|E1L9R3	tr|D1BQ57|D1BQ57_VEIPT	tr|D1BQ57|D1BQ57_VEIPT Outer membrane chaperone Skp (OmpH) OS=Veillonella parvula (strain ATCC 10790 / DSM 2008 / CCUG 5123 / JCM 12972 / NCTC 11810 / Te3) OX=479436 GN=Vpar_1840 PE=3 SV=1	9	2666000	44473000	5	5	5	1	5	1	5	1	5	34.9	34.9	34.9	16.775	9.7004	0	14	16
708	E1L9X1|E1L9X1	tr|E1L9X1|E1L9X1_9FIRM	tr|E1L9X1|E1L9X1_9FIRM Aldehyde oxidase and xanthine dehydrogenase, molybdopterin binding domain protein OS=Veillonella atypica ACS-134-V-Col7a OX=866778 GN=HMPREF9684_0812 PE=4 SV=1	44	18177000	8424800	16	6	6	12	9	5	1	5	1	22.8	9.4	9.4	83.834	40.095	16	9	41
709	D1BPE3|D1BPE3	tr|D1BPE3|D1BPE3_VEIPT	tr|D1BPE3|D1BPE3_VEIPT Phosphoenolpyruvate-protein phosphotransferase OS=Veillonella parvula (strain ATCC 10790 / DSM 2008 / CCUG 5123 / JCM 12972 / NCTC 11810 / Te3) OX=479436 GN=Vpar_1574 PE=3 SV=1	28	1594500	8401100	11	11	5	4	9	4	9	1	4	18.4	18.4	9	62.696	16.865	3	20	28
710	D1BPR1|D1BPR1	tr|D1BPR1|D1BPR1_VEIPT	tr|D1BPR1|D1BPR1_VEIPT SNARE associated Golgi protein-related protein OS=Veillonella parvula (strain ATCC 10790 / DSM 2008 / CCUG 5123 / JCM 12972 / NCTC 11810 / Te3) OX=479436 GN=Vpar_1692 PE=4 SV=1	6	62155000	22043000	4	4	1	2	4	2	4	0	1	15.9	15.9	4.1	22.351	4.6381	20	20	74
711	D1BLJ7|D1BLJ7	tr|D1BLJ7|D1BLJ7_VEIPT	tr|D1BLJ7|D1BLJ7_VEIPT Uncharacterized protein OS=Veillonella parvula (strain ATCC 10790 / DSM 2008 / CCUG 5123 / JCM 12972 / NCTC 11810 / Te3) OX=479436 GN=Vpar_0571 PE=3 SV=1	17	10541000	21895000	6	6	2	4	5	4	5	0	2	25	25	10	24.543	14.527	10	13	27
712	D1BQU0|D1BQU0	tr|D1BQU0|D1BQU0_VEIPT	tr|D1BQU0|D1BQU0_VEIPT Uroporphyrinogen decarboxylase OS=Veillonella parvula (strain ATCC 10790 / DSM 2008 / CCUG 5123 / JCM 12972 / NCTC 11810 / Te3) OX=479436 GN=hemE PE=3 SV=1	20	1692500	18266000	9	9	9	1	9	1	9	1	9	26.3	26.3	26.3	39.655	5.4072	0	15	18
713	D1BLJ0|D1BLJ0	tr|D1BLJ0|D1BLJ0_VEIPT	tr|D1BLJ0|D1BLJ0_VEIPT Dihydroorotase OS=Veillonella parvula (strain ATCC 10790 / DSM 2008 / CCUG 5123 / JCM 12972 / NCTC 11810 / Te3) OX=479436 GN=pyrC PE=3 SV=1	26	6837800	19717000	11	11	3	5	10	5	10	0	2	24.1	24.1	8.6	46.247	39.216	7	16	33
714	E1LE68|E1LE68	tr|E1LE68|E1LE68_9FIRM	tr|E1LE68|E1LE68_9FIRM Putative gluconeogenesis factor OS=Veillonella atypica ACS-134-V-Col7a OX=866778 GN=HMPREF9684_1134 PE=3 SV=1	17	9819300	4902600	7	6	6	7	1	6	0	6	0	14.9	12.7	12.7	49.143	10.143	31	18	63
715	E1LA17|E1LA17	tr|E1LA17|E1LA17_9FIRM	tr|E1LA17|E1LA17_9FIRM Biotin synthase OS=Veillonella atypica ACS-134-V-Col7a OX=866778 GN=bioB PE=3 SV=1	24	598780000	4860800	18	18	13	18	5	18	5	13	3	57.5	57.5	44.3	37.853	323.31	543	21	596
716	D1BP95|D1BP95	tr|D1BP95|D1BP95_VEIPT	tr|D1BP95|D1BP95_VEIPT Uncharacterized protein OS=Veillonella parvula (strain ATCC 10790 / DSM 2008 / CCUG 5123 / JCM 12972 / NCTC 11810 / Te3) OX=479436 GN=Vpar_1526 PE=4 SV=1	24	21659000	26401000	14	11	11	4	14	1	11	1	11	26.8	22.1	22.1	63.888	75.604	23	54	112
717	D1BMY7|D1BMY7	tr|D1BMY7|D1BMY7_VEIPT	tr|D1BMY7|D1BMY7_VEIPT Tyrosine--tRNA ligase OS=Veillonella parvula (strain ATCC 10790 / DSM 2008 / CCUG 5123 / JCM 12972 / NCTC 11810 / Te3) OX=479436 GN=tyrS PE=3 SV=1	16	1241000	5885900	6	6	3	3	5	3	5	1	2	14.9	14.9	5.7	45.647	42.465	2	9	18
718	E1L9Z4|E1L9Z4	tr|E1L9Z4|E1L9Z4_9FIRM	tr|E1L9Z4|E1L9Z4_9FIRM Addiction module antitoxin, RelB/DinJ family OS=Veillonella atypica ACS-134-V-Col7a OX=866778 GN=HMPREF9684_1601 PE=3 SV=1	17	114390000	4673200	8	8	3	7	3	7	3	3	0	29.7	29.7	11.4	22.829	4.9511	19	1	20
719	D1BLH6|D1BLH6	tr|D1BLH6|D1BLH6_VEIPT	tr|D1BLH6|D1BLH6_VEIPT Permease YjgP/YjgQ family protein OS=Veillonella parvula (strain ATCC 10790 / DSM 2008 / CCUG 5123 / JCM 12972 / NCTC 11810 / Te3) OX=479436 GN=Vpar_0550 PE=4 SV=1	17	29835000	6486200	8	3	3	5	7	0	3	0	3	22	8.8	8.8	40.276	68.974	25	28	130
720	D1BMM6|D1BMM6	tr|D1BMM6|D1BMM6_VEIPT	tr|D1BMM6|D1BMM6_VEIPT Riboflavin biosynthesis protein RibBA OS=Veillonella parvula (strain ATCC 10790 / DSM 2008 / CCUG 5123 / JCM 12972 / NCTC 11810 / Te3) OX=479436 GN=ribBA PE=3 SV=1	31	3795000	13695000	13	13	4	4	10	4	10	0	4	27.2	27.2	9.8	44.717	15.003	4	28	52
721	D1BLF7|D1BLF7	tr|D1BLF7|D1BLF7_VEIPT	tr|D1BLF7|D1BLF7_VEIPT UDP-3-O-acylglucosamine N-acyltransferase OS=Veillonella parvula (strain ATCC 10790 / DSM 2008 / CCUG 5123 / JCM 12972 / NCTC 11810 / Te3) OX=479436 GN=lpxD PE=3 SV=1	16	16292000	11651000	4	3	3	1	4	0	3	0	3	12	10.2	10.2	36.668	6.2465	2	4	8
722	E1LBD9|E1LBD9	tr|E1LBD9|E1LBD9_9FIRM	tr|E1LBD9|E1LBD9_9FIRM Metallo-beta-lactamase domain protein OS=Veillonella atypica ACS-134-V-Col7a OX=866778 GN=HMPREF9684_1411 PE=3 SV=1	30	15955000	13257000	8	3	3	8	6	3	1	3	1	16.8	6.1	6.1	47.306	5.5987	9	8	20
723	D1BM75|D1BM75;E1LD98|E1LD98	tr|D1BM75|D1BM75_VEIPT;tr|E1LD98|E1LD98_9FIRM	tr|D1BM75|D1BM75_VEIPT Peptide chain release factor 2 OS=Veillonella parvula (strain ATCC 10790 / DSM 2008 / CCUG 5123 / JCM 12972 / NCTC 11810 / Te3) OX=479436 GN=prfB PE=3 SV=1;tr|E1LD98|E1LD98_9FIRM Peptide chain release factor 2 OS=Veillonella atypica	23	2369600	11184000	6	6	6	2	4	2	4	2	4	13.9	13.9	13.9	41.693	7.5149	2	8	16
724	D1BLW6|D1BLW6	tr|D1BLW6|D1BLW6_VEIPT	tr|D1BLW6|D1BLW6_VEIPT 2-nitropropane dioxygenase NPD OS=Veillonella parvula (strain ATCC 10790 / DSM 2008 / CCUG 5123 / JCM 12972 / NCTC 11810 / Te3) OX=479436 GN=Vpar_0690 PE=4 SV=1	16	9157200	21769000	6	6	3	3	6	3	6	1	3	21.8	21.8	11	33.675	16.381	5	10	32
725	D1BMK3|D1BMK3	tr|D1BMK3|D1BMK3_VEIPT	tr|D1BMK3|D1BMK3_VEIPT Aspartate-semialdehyde dehydrogenase OS=Veillonella parvula (strain ATCC 10790 / DSM 2008 / CCUG 5123 / JCM 12972 / NCTC 11810 / Te3) OX=479436 GN=asd PE=3 SV=1	22	1676500	21775000	9	9	5	2	9	2	9	0	5	33.2	33.2	19.5	37.752	26.913	1	22	24
726	D1BPS5|D1BPS5	tr|D1BPS5|D1BPS5_VEIPT	tr|D1BPS5|D1BPS5_VEIPT Two component transcriptional regulator, winged helix family OS=Veillonella parvula (strain ATCC 10790 / DSM 2008 / CCUG 5123 / JCM 12972 / NCTC 11810 / Te3) OX=479436 GN=Vpar_1706 PE=4 SV=1	13	47053000	41162000	7	2	2	4	6	1	1	1	1	29.9	10.7	10.7	25.484	6.1511	14	10	33
727	E1LE42|E1LE42	tr|E1LE42|E1LE42_9FIRM	tr|E1LE42|E1LE42_9FIRM Uncharacterized protein OS=Veillonella atypica ACS-134-V-Col7a OX=866778 GN=HMPREF9684_1107 PE=3 SV=1	4	165200000	39036000	3	3	1	3	2	3	2	1	0	9.8	9.8	4.9	15.461	9.186	7	3	24
728	E1LA38|E1LA38	tr|E1LA38|E1LA38_9FIRM	tr|E1LA38|E1LA38_9FIRM 4Fe-4S binding domain protein OS=Veillonella atypica ACS-134-V-Col7a OX=866778 GN=HMPREF9684_1856 PE=4 SV=1	15	18705000	14003000	7	1	1	5	4	1	0	1	0	22.1	4.1	4.1	30.003	2.5777	11	3	19
729	D1BLL2|D1BLL2	tr|D1BLL2|D1BLL2_VEIPT	tr|D1BLL2|D1BLL2_VEIPT Uncharacterized protein OS=Veillonella parvula (strain ATCC 10790 / DSM 2008 / CCUG 5123 / JCM 12972 / NCTC 11810 / Te3) OX=479436 GN=Vpar_0586 PE=3 SV=1	4	71394000	46744000	3	1	1	2	3	0	1	0	1	9.8	4.9	4.9	15.483	2.0826	4	5	15
730	D1BN29|D1BN29;E1L9D0|E1L9D0	tr|D1BN29|D1BN29_VEIPT	tr|D1BN29|D1BN29_VEIPT Aminotransferase class I and II OS=Veillonella parvula (strain ATCC 10790 / DSM 2008 / CCUG 5123 / JCM 12972 / NCTC 11810 / Te3) OX=479436 GN=Vpar_1105 PE=1 SV=1	27	535130	10591000	7	7	7	1	7	1	7	1	7	15.2	15.2	15.2	46.033	9.4037	0	13	14
731	D1BMZ1|D1BMZ1	tr|D1BMZ1|D1BMZ1_VEIPT	tr|D1BMZ1|D1BMZ1_VEIPT Phenylalanine--tRNA ligase beta subunit OS=Veillonella parvula (strain ATCC 10790 / DSM 2008 / CCUG 5123 / JCM 12972 / NCTC 11810 / Te3) OX=479436 GN=pheT PE=3 SV=1	48	6144400	7698900	13	13	8	4	12	4	12	1	7	20.5	20.5	14	89.698	72.82	4	14	22
732	E1LBV5|E1LBV5	tr|E1LBV5|E1LBV5_9FIRM	tr|E1LBV5|E1LBV5_9FIRM Lon protease OS=Veillonella atypica ACS-134-V-Col7a OX=866778 GN=lon PE=2 SV=1	47	43697000	12601000	33	15	15	28	18	15	4	15	4	42.8	22.5	22.5	85.901	96.364	79	25	193
733	D1BNC9|D1BNC9	tr|D1BNC9|D1BNC9_VEIPT	tr|D1BNC9|D1BNC9_VEIPT AAA ATPase central domain protein OS=Veillonella parvula (strain ATCC 10790 / DSM 2008 / CCUG 5123 / JCM 12972 / NCTC 11810 / Te3) OX=479436 GN=Vpar_1206 PE=3 SV=1	23	27641000	5630500	14	7	7	8	9	1	6	1	6	36.5	18.7	18.7	47.878	19.468	115	27	188
734	E1LAA2|E1LAA2	tr|E1LAA2|E1LAA2_9FIRM	tr|E1LAA2|E1LAA2_9FIRM Glutamate--ammonia ligase, catalytic domain protein OS=Veillonella atypica ACS-134-V-Col7a OX=866778 GN=glnA PE=3 SV=1	41	8044700	5733400	10	6	6	9	4	6	1	6	1	14.8	9.5	9.5	71.234	4.3521	15	6	26
735	D1BNE9|D1BNE9	tr|D1BNE9|D1BNE9_VEIPT	tr|D1BNE9|D1BNE9_VEIPT Cell shape-determining protein MreC OS=Veillonella parvula (strain ATCC 10790 / DSM 2008 / CCUG 5123 / JCM 12972 / NCTC 11810 / Te3) OX=479436 GN=Vpar_1226 PE=3 SV=1	22	17759000	10110000	10	10	6	4	8	4	8	1	6	35.4	35.4	23.6	33.109	46.318	10	10	33
736	E1LE64|E1LE64	tr|E1LE64|E1LE64_9FIRM	tr|E1LE64|E1LE64_9FIRM Dihydroorotase OS=Veillonella atypica ACS-134-V-Col7a OX=866778 GN=pyrC PE=3 SV=1	26	6837800	16130000	10	2	2	6	8	1	0	1	0	20.6	5.1	5.1	46.162	4.8005	7	12	26
737	E1LE73|E1LE73	tr|E1LE73|E1LE73_9FIRM	tr|E1LE73|E1LE73_9FIRM SLH domain-containing protein OS=Veillonella atypica ACS-134-V-Col7a OX=866778 GN=HMPREF9684_1139 PE=4 SV=1	26	23681000	6541000	4	2	2	4	3	2	1	2	1	9.7	5.4	5.4	46.724	44.593	29	8	43
738	D1BNF7|D1BNF7	tr|D1BNF7|D1BNF7_VEIPT	tr|D1BNF7|D1BNF7_VEIPT Bifunctional protein PyrR OS=Veillonella parvula (strain ATCC 10790 / DSM 2008 / CCUG 5123 / JCM 12972 / NCTC 11810 / Te3) OX=479436 GN=pyrR PE=3 SV=1	13	2814900	6465700	4	3	3	1	3	0	2	0	2	22	17.3	17.3	19.426	3.1023	7	9	22
739	E1LAL9|E1LAL9	tr|E1LAL9|E1LAL9_9FIRM	tr|E1LAL9|E1LAL9_9FIRM Transcription termination/antitermination protein NusG OS=Veillonella atypica ACS-134-V-Col7a OX=866778 GN=nusG PE=3 SV=1	14	35083000	3407100	9	9	2	7	6	7	6	2	0	51.7	51.7	9.6	20.086	41.292	15	8	24
740	E1L9J5|E1L9J5	tr|E1L9J5|E1L9J5_9FIRM	tr|E1L9J5|E1L9J5_9FIRM Nitrite/sulfite reductase ferredoxin domain protein OS=Veillonella atypica ACS-134-V-Col7a OX=866778 GN=HMPREF9684_0569 PE=4 SV=1	22	15215000	21130000	12	7	7	10	4	7	0	7	0	36.2	24.5	24.5	34.696	9.0725	18	9	30
741	D1BPS1|D1BPS1	tr|D1BPS1|D1BPS1_VEIPT	tr|D1BPS1|D1BPS1_VEIPT Uncharacterized protein OS=Veillonella parvula (strain ATCC 10790 / DSM 2008 / CCUG 5123 / JCM 12972 / NCTC 11810 / Te3) OX=479436 GN=Vpar_1702 PE=4 SV=1	16	481500	18937000	8	8	8	1	8	1	8	1	8	36.3	36.3	36.3	29.395	105.11	0	22	34
742	D1BP79|D1BP79	tr|D1BP79|D1BP79_VEIPT	tr|D1BP79|D1BP79_VEIPT Transcription termination/antitermination protein NusG OS=Veillonella parvula (strain ATCC 10790 / DSM 2008 / CCUG 5123 / JCM 12972 / NCTC 11810 / Te3) OX=479436 GN=nusG PE=3 SV=1	14	19745000	18696000	8	1	1	6	7	1	1	1	1	48.3	6.2	6.2	20.045	3.315	15	20	41
743	E1L9C4|E1L9C4	tr|E1L9C4|E1L9C4_9FIRM	tr|E1L9C4|E1L9C4_9FIRM Uncharacterized protein OS=Veillonella atypica ACS-134-V-Col7a OX=866778 GN=HMPREF9684_0657 PE=4 SV=1	18	43785000	10774000	9	6	6	8	3	5	0	5	0	34.3	25.4	25.4	33.863	13.949	41	14	65
744	D1BMS1|D1BMS1	tr|D1BMS1|D1BMS1_VEIPT	tr|D1BMS1|D1BMS1_VEIPT Glutamyl-tRNA(Gln) amidotransferase subunit A OS=Veillonella parvula (strain ATCC 10790 / DSM 2008 / CCUG 5123 / JCM 12972 / NCTC 11810 / Te3) OX=479436 GN=gatA PE=3 SV=1	29	176100	16018000	12	12	10	1	10	1	10	0	9	30.9	30.9	25.7	51.775	120.6	1	19	37
745	E1LDY9|E1LDY9	tr|E1LDY9|E1LDY9_9FIRM	tr|E1LDY9|E1LDY9_9FIRM Energy-coupling factor transporter ATP-binding protein EcfA2 OS=Veillonella atypica ACS-134-V-Col7a OX=866778 GN=HMPREF9684_0947 PE=3 SV=1	16	17452000	10190000	4	3	3	4	2	3	2	3	2	13.6	9.8	9.8	31.578	3.4217	10	4	18
746	D1BN75|D1BN75	tr|D1BN75|D1BN75_VEIPT	tr|D1BN75|D1BN75_VEIPT Polysaccharide biosynthesis protein OS=Veillonella parvula (strain ATCC 10790 / DSM 2008 / CCUG 5123 / JCM 12972 / NCTC 11810 / Te3) OX=479436 GN=Vpar_1151 PE=4 SV=1	15	7470600	6750800	3	3	2	1	3	1	3	0	2	5.8	5.8	3.5	55.924	5.5284	1	6	10
747	E1LD70|E1LD70	tr|E1LD70|E1LD70_9FIRM	tr|E1LD70|E1LD70_9FIRM Phosphoenolpyruvate-protein phosphotransferase OS=Veillonella atypica ACS-134-V-Col7a OX=866778 GN=ptsP PE=3 SV=1	32	7018500	3257600	11	5	5	8	5	5	0	5	0	17	6.6	6.6	62.594	4.1539	9	11	22
748	E1L9R8|E1L9R8	tr|E1L9R8|E1L9R8_9FIRM	tr|E1L9R8|E1L9R8_9FIRM Putative selenium-dependent hydroxylase accessory protein YqeC OS=Veillonella atypica ACS-134-V-Col7a OX=866778 GN=yqeC PE=4 SV=1	15	140340000	40895000	10	7	7	10	4	7	1	7	1	49.2	37.7	37.7	28.17	95.734	121	29	159
749	E1LAE1|E1LAE1	tr|E1LAE1|E1LAE1_9FIRM	tr|E1LAE1|E1LAE1_9FIRM Aspartate-semialdehyde dehydrogenase OS=Veillonella atypica ACS-134-V-Col7a OX=866778 GN=asd PE=3 SV=1	24	1536700	13914000	6	2	2	3	4	1	0	1	0	21.3	7.6	7.6	37.697	3.0636	2	6	10
750	D1BLE4|D1BLE4	tr|D1BLE4|D1BLE4_VEIPT	tr|D1BLE4|D1BLE4_VEIPT Cell shape-determining protein MreB OS=Veillonella parvula (strain ATCC 10790 / DSM 2008 / CCUG 5123 / JCM 12972 / NCTC 11810 / Te3) OX=479436 GN=mreB PE=3 SV=1	26	3752400	24674000	14	14	11	3	14	3	14	1	11	31.5	31.5	26.5	50.244	46.562	1	26	38
751	D1BMA9|D1BMA9	tr|D1BMA9|D1BMA9_VEIPT	tr|D1BMA9|D1BMA9_VEIPT Methyltransferase OS=Veillonella parvula (strain ATCC 10790 / DSM 2008 / CCUG 5123 / JCM 12972 / NCTC 11810 / Te3) OX=479436 GN=Vpar_0835 PE=4 SV=1	11	3038700	18227000	5	5	5	2	5	2	5	2	5	24	24	24	20.553	9.7141	0	20	42
752	E1LBC4|E1LBC4	tr|E1LBC4|E1LBC4_9FIRM	tr|E1LBC4|E1LBC4_9FIRM Uncharacterized protein OS=Veillonella atypica ACS-134-V-Col7a OX=866778 GN=HMPREF9684_1395 PE=4 SV=1	14	15883000	10544000	6	3	3	6	3	3	0	3	0	25.2	12.6	12.6	25.002	4.1241	20	15	35
753	E1LD01|E1LD01	tr|E1LD01|E1LD01_9FIRM	tr|E1LD01|E1LD01_9FIRM Putative glutamate synthase (NADPH), homotetrameric OS=Veillonella atypica ACS-134-V-Col7a OX=866778 GN=HMPREF9684_0333 PE=4 SV=1	29	23715000	8380700	9	2	2	8	5	2	0	2	0	22.3	3.8	3.8	49.293	3.0951	23	11	47
754	D1BMK8|D1BMK8	tr|D1BMK8|D1BMK8_VEIPT	tr|D1BMK8|D1BMK8_VEIPT LexA repressor OS=Veillonella parvula (strain ATCC 10790 / DSM 2008 / CCUG 5123 / JCM 12972 / NCTC 11810 / Te3) OX=479436 GN=lexA PE=3 SV=1	11	23667000	6691000	5	2	2	2	2	0	0	0	0	20.2	9	9	24.913	14.502	3	3	10
755	D1BN23|D1BN23	tr|D1BN23|D1BN23_VEIPT	tr|D1BN23|D1BN23_VEIPT Uncharacterized protein OS=Veillonella parvula (strain ATCC 10790 / DSM 2008 / CCUG 5123 / JCM 12972 / NCTC 11810 / Te3) OX=479436 GN=Vpar_1099 PE=4 SV=1	17	27485000	19528000	9	9	6	3	8	3	8	0	5	33.4	33.4	24.3	33.076	39.671	9	24	73
756	E1LB56|E1LB56	tr|E1LB56|E1LB56_9FIRM	tr|E1LB56|E1LB56_9FIRM Chaperone protein DnaJ OS=Veillonella atypica ACS-134-V-Col7a OX=866778 GN=dnaJ PE=3 SV=1	21	15609000	16675000	10	4	4	7	6	4	0	4	0	27.3	11.2	11.2	42.039	13.081	17	26	52
757	E1LDY8|E1LDY8;D1BP32|D1BP32	tr|E1LDY8|E1LDY8_9FIRM;tr|D1BP32|D1BP32_VEIPT	tr|E1LDY8|E1LDY8_9FIRM Energy-coupling factor transporter transmembrane protein EcfT OS=Veillonella atypica ACS-134-V-Col7a OX=866778 GN=ecfT PE=3 SV=1;tr|D1BP32|D1BP32_VEIPT Energy-coupling factor transporter transmembrane protein EcfT OS=Veillonella parv	10	34195000	5663600	3	3	3	3	2	3	2	3	2	13.5	13.5	13.5	29.578	12.318	26	9	62
758	D1BMG4|D1BMG4	tr|D1BMG4|D1BMG4_VEIPT	tr|D1BMG4|D1BMG4_VEIPT Glutamine synthetase catalytic region OS=Veillonella parvula (strain ATCC 10790 / DSM 2008 / CCUG 5123 / JCM 12972 / NCTC 11810 / Te3) OX=479436 GN=Vpar_0890 PE=3 SV=1	42	3845700	12200000	16	16	12	4	14	4	14	1	11	26.3	26.3	21	71.334	39.515	4	31	69
759	D1BLH7|D1BLH7	tr|D1BLH7|D1BLH7_VEIPT	tr|D1BLH7|D1BLH7_VEIPT Uncharacterized protein with myosin-like protein domain OS=Veillonella parvula (strain ATCC 10790 / DSM 2008 / CCUG 5123 / JCM 12972 / NCTC 11810 / Te3) OX=479436 GN=Vpar_0551 PE=4 SV=1	25	2739200	53460000	16	15	15	2	14	1	13	1	13	44.1	41.6	41.6	43.82	277	11	34	142
760	D1BNN5|D1BNN5	tr|D1BNN5|D1BNN5_VEIPT	tr|D1BNN5|D1BNN5_VEIPT Acetolactate synthase OS=Veillonella parvula (strain ATCC 10790 / DSM 2008 / CCUG 5123 / JCM 12972 / NCTC 11810 / Te3) OX=479436 GN=Vpar_1313 PE=3 SV=1	29	3904500	7283800	11	11	5	5	4	5	4	0	1	19.5	19.5	9.4	63.052	9.413	7	5	20
761	D1BPP6|D1BPP6	tr|D1BPP6|D1BPP6_VEIPT	tr|D1BPP6|D1BPP6_VEIPT Substrate-binding region of ABC-type glycine betaine transport system OS=Veillonella parvula (strain ATCC 10790 / DSM 2008 / CCUG 5123 / JCM 12972 / NCTC 11810 / Te3) OX=479436 GN=Vpar_1677 PE=3 SV=1	21	988200	22234000	9	9	9	1	8	1	8	1	8	19.6	19.6	19.6	56.214	25.334	1	15	50
762	D1BNA9|D1BNA9	tr|D1BNA9|D1BNA9_VEIPT	tr|D1BNA9|D1BNA9_VEIPT Ni/Fe-hydrogenase, b-type cytochrome subunit OS=Veillonella parvula (strain ATCC 10790 / DSM 2008 / CCUG 5123 / JCM 12972 / NCTC 11810 / Te3) OX=479436 GN=Vpar_1186 PE=3 SV=1	13	8380500	12228000	8	8	3	5	6	5	6	1	3	24.9	24.9	11.9	31.566	45.761	8	25	81
763	E1LD93|E1LD93	tr|E1LD93|E1LD93_9FIRM	tr|E1LD93|E1LD93_9FIRM ABC transporter, permease protein OS=Veillonella atypica ACS-134-V-Col7a OX=866778 GN=HMPREF9684_0138 PE=3 SV=1	15	97091000	9058100	6	5	5	6	3	5	2	5	2	26.4	23.1	23.1	23.973	93.228	22	2	26
764	D1BLX5|D1BLX5	tr|D1BLX5|D1BLX5_VEIPT	tr|D1BLX5|D1BLX5_VEIPT 3-oxoacyl-[acyl-carrier-protein] reductase OS=Veillonella parvula (strain ATCC 10790 / DSM 2008 / CCUG 5123 / JCM 12972 / NCTC 11810 / Te3) OX=479436 GN=Vpar_0699 PE=3 SV=1	11	15249000	25613000	7	2	2	5	7	1	2	1	2	36	13.8	13.8	25.897	8.4088	2	15	46
765	D1BLD6|D1BLD6	tr|D1BLD6|D1BLD6_VEIPT	tr|D1BLD6|D1BLD6_VEIPT Lysine--tRNA ligase OS=Veillonella parvula (strain ATCC 10790 / DSM 2008 / CCUG 5123 / JCM 12972 / NCTC 11810 / Te3) OX=479436 GN=lysS PE=3 SV=1	34	21267000	8625700	18	18	6	11	11	11	11	2	4	35	35	11.5	58.032	26.123	23	20	65
766	E1L991|E1L991	tr|E1L991|E1L991_9FIRM	tr|E1L991|E1L991_9FIRM Phenylalanine--tRNA ligase beta subunit OS=Veillonella atypica ACS-134-V-Col7a OX=866778 GN=pheT PE=3 SV=1	47	12435000	4327200	9	4	4	7	5	4	0	4	0	12.2	5.7	5.7	89.647	40.23	13	6	21
767	D1BPM7|D1BPM7	tr|D1BPM7|D1BPM7_VEIPT	tr|D1BPM7|D1BPM7_VEIPT Metallophosphoesterase OS=Veillonella parvula (strain ATCC 10790 / DSM 2008 / CCUG 5123 / JCM 12972 / NCTC 11810 / Te3) OX=479436 GN=Vpar_1658 PE=4 SV=1	19	2128800	781100	5	5	4	1	2	1	2	0	2	10.2	10.2	7.6	44.602	4.6009	1	3	10
768	E1LAN7|E1LAN7	tr|E1LAN7|E1LAN7_9FIRM	tr|E1LAN7|E1LAN7_9FIRM DNA polymerase III PolC-type OS=Veillonella atypica ACS-134-V-Col7a OX=866778 GN=polC PE=3 SV=1	70	29551000	1001400	13	13	8	11	4	11	4	8	1	10.2	10.2	6	139.75	18.859	15	2	17
769	D1BPX6|D1BPX6	tr|D1BPX6|D1BPX6_VEIPT	tr|D1BPX6|D1BPX6_VEIPT MotA/TolQ/ExbB proton channel OS=Veillonella parvula (strain ATCC 10790 / DSM 2008 / CCUG 5123 / JCM 12972 / NCTC 11810 / Te3) OX=479436 GN=Vpar_1757 PE=3 SV=1	6	65355000	18611000	4	4	3	2	3	2	3	1	2	21.4	21.4	17.4	22.059	56.827	1	2	24
770	E1L992|E1L992	tr|E1L992|E1L992_9FIRM	tr|E1L992|E1L992_9FIRM Phenylalanine--tRNA ligase alpha subunit OS=Veillonella atypica ACS-134-V-Col7a OX=866778 GN=pheS PE=3 SV=1	24	28833000	7271100	10	3	3	10	5	3	0	3	0	22.6	9.1	9.1	38.674	4.1416	26	8	41
771	E1LAT5|E1LAT5	tr|E1LAT5|E1LAT5_9FIRM	tr|E1LAT5|E1LAT5_9FIRM Ribonuclease R OS=Veillonella atypica ACS-134-V-Col7a OX=866778 GN=rnr PE=3 SV=1	47	12857000	2332300	14	10	10	13	2	10	2	10	2	17.3	12.5	12.5	89.283	18.237	24	4	43
772	D1BLG8|D1BLG8	tr|D1BLG8|D1BLG8_VEIPT	tr|D1BLG8|D1BLG8_VEIPT 3-deoxy-manno-octulosonate cytidylyltransferase OS=Veillonella parvula (strain ATCC 10790 / DSM 2008 / CCUG 5123 / JCM 12972 / NCTC 11810 / Te3) OX=479436 GN=kdsB PE=3 SV=1	17	727910	16741000	9	9	7	3	9	3	9	1	7	32.1	32.1	24.3	27.522	10.582	14	15	29
773	D1BPN7|D1BPN7	tr|D1BPN7|D1BPN7_VEIPT	tr|D1BPN7|D1BPN7_VEIPT Transcriptional regulator, GntR family OS=Veillonella parvula (strain ATCC 10790 / DSM 2008 / CCUG 5123 / JCM 12972 / NCTC 11810 / Te3) OX=479436 GN=Vpar_1668 PE=4 SV=1	17	4540100	15319000	8	8	7	1	8	1	8	0	7	35.3	35.3	31.5	26.913	31.994	2	23	32
774	E1LBY6|E1LBY6	tr|E1LBY6|E1LBY6_9FIRM	tr|E1LBY6|E1LBY6_9FIRM Cell shape-determining protein MreC OS=Veillonella atypica ACS-134-V-Col7a OX=866778 GN=mreC PE=3 SV=1	22	26603000	4982600	9	5	5	8	2	5	0	5	0	31.1	19.3	19.3	33.312	12.999	28	3	36
775	D1BQC9|D1BQC9	tr|D1BQC9|D1BQC9_VEIPT	tr|D1BQC9|D1BQC9_VEIPT Hemagluttinin domain protein OS=Veillonella parvula (strain ATCC 10790 / DSM 2008 / CCUG 5123 / JCM 12972 / NCTC 11810 / Te3) OX=479436 GN=Vpar_0053 PE=3 SV=1	198	3283400	8879900	103	103	99	7	27	7	27	5	23	43.5	43.5	42	353.29	323.31	3	23	921
776	D1BKZ2|D1BKZ2;E1LBE4|E1LBE4	tr|D1BKZ2|D1BKZ2_VEIPT;tr|E1LBE4|E1LBE4_9FIRM	tr|D1BKZ2|D1BKZ2_VEIPT Uncharacterized protein OS=Veillonella parvula (strain ATCC 10790 / DSM 2008 / CCUG 5123 / JCM 12972 / NCTC 11810 / Te3) OX=479436 GN=Vpar_0365 PE=4 SV=1;tr|E1LBE4|E1LBE4_9FIRM Uncharacterized protein OS=Veillonella atypica ACS-134-V	8	4150000	27710000	4	4	4	2	4	2	4	2	4	27.4	27.4	27.4	16.767	8.5957	1	5	8
777	D1BMS4|D1BMS4	tr|D1BMS4|D1BMS4_VEIPT	tr|D1BMS4|D1BMS4_VEIPT ATP-dependent DNA helicase OS=Veillonella parvula (strain ATCC 10790 / DSM 2008 / CCUG 5123 / JCM 12972 / NCTC 11810 / Te3) OX=479436 GN=Vpar_1000 PE=3 SV=1	49	19010000	10405000	29	29	7	16	17	16	17	1	5	41	41	11.2	82.216	47.299	34	17	80
778	E1LAN3|E1LAN3	tr|E1LAN3|E1LAN3_9FIRM	tr|E1LAN3|E1LAN3_9FIRM Riboflavin biosynthesis protein RibBA OS=Veillonella atypica ACS-134-V-Col7a OX=866778 GN=ribB PE=3 SV=1	31	4933900	7826600	12	3	3	7	6	3	0	3	0	25	7.5	7.5	44.817	2.9293	9	15	35
779	D1BLB1|D1BLB1	tr|D1BLB1|D1BLB1_VEIPT	tr|D1BLB1|D1BLB1_VEIPT Binding-protein-dependent transport systems inner membrane component OS=Veillonella parvula (strain ATCC 10790 / DSM 2008 / CCUG 5123 / JCM 12972 / NCTC 11810 / Te3) OX=479436 GN=Vpar_0485 PE=3 SV=1	7	5029100	45280000	4	4	3	2	4	2	4	1	3	13.4	13.4	11.4	32.833	25.365	1	21	45
780	D1BPY6|D1BPY6	tr|D1BPY6|D1BPY6_VEIPT	tr|D1BPY6|D1BPY6_VEIPT TPR repeat-containing protein OS=Veillonella parvula (strain ATCC 10790 / DSM 2008 / CCUG 5123 / JCM 12972 / NCTC 11810 / Te3) OX=479436 GN=Vpar_1767 PE=4 SV=1	14	5474000	23793000	7	7	6	2	6	2	6	1	6	36.7	36.7	33.5	23.409	57.773	13	7	28
781	D1BLP4|D1BLP4	tr|D1BLP4|D1BLP4_VEIPT	tr|D1BLP4|D1BLP4_VEIPT Exopolyphosphatase OS=Veillonella parvula (strain ATCC 10790 / DSM 2008 / CCUG 5123 / JCM 12972 / NCTC 11810 / Te3) OX=479436 GN=Vpar_0618 PE=3 SV=1	32	3681700	1434700	7	7	3	3	6	3	6	0	3	11.5	11.5	5	58.143	2.8972	1	8	10
782	E1L939|E1L939	tr|E1L939|E1L939_9FIRM	tr|E1L939|E1L939_9FIRM N-acetylglucosaminyldiphosphoundecaprenol N-acetyl-beta-D-mannosaminyltransferase OS=Veillonella atypica ACS-134-V-Col7a OX=866778 GN=HMPREF9684_1875 PE=3 SV=1	12	79175000	7678000	6	3	3	6	3	3	0	3	0	22.9	13.8	13.8	26.333	12.1	25	14	65
783	E1LEB0|E1LEB0	tr|E1LEB0|E1LEB0_9FIRM	tr|E1LEB0|E1LEB0_9FIRM Cell shape-determining protein MreB OS=Veillonella atypica ACS-134-V-Col7a OX=866778 GN=ftsA PE=3 SV=1	24	12269000	7772800	10	7	7	9	3	7	0	7	0	28.4	22.7	22.7	44.346	18.416	22	6	31
784	E1LB97|E1LB97	tr|E1LB97|E1LB97_9FIRM	tr|E1LB97|E1LB97_9FIRM Putative D-methionine ABC transporter, ATP-binding protein OS=Veillonella atypica ACS-134-V-Col7a OX=866778 GN=HMPREF9684_1470 PE=4 SV=1	21	36280000	5246500	7	5	5	7	2	5	0	5	0	24.4	16.1	16.1	38.045	29.004	68	13	92
785	D1BNY4|D1BNY4;E1LCV3|E1LCV3;E1LBG7|E1LBG7	tr|D1BNY4|D1BNY4_VEIPT	tr|D1BNY4|D1BNY4_VEIPT Polypeptide-transport-associated domain protein ShlB-type OS=Veillonella parvula (strain ATCC 10790 / DSM 2008 / CCUG 5123 / JCM 12972 / NCTC 11810 / Te3) OX=479436 GN=Vpar_1414 PE=4 SV=1	31	8361200	4432100	13	13	13	1	6	1	6	1	6	26	26	26	62.488	40.237	0	4	29
786	E1LCD4|E1LCD4	tr|E1LCD4|E1LCD4_9FIRM	tr|E1LCD4|E1LCD4_9FIRM Phosphate acyltransferase OS=Veillonella atypica ACS-134-V-Col7a OX=866778 GN=plsX PE=3 SV=1	19	47376000	8559700	11	11	9	11	3	11	3	9	1	42.7	42.7	34.5	36.231	77.461	88	15	116
787	E1LDK7|E1LDK7	tr|E1LDK7|E1LDK7_9FIRM	tr|E1LDK7|E1LDK7_9FIRM SLH domain-containing protein OS=Veillonella atypica ACS-134-V-Col7a OX=866778 GN=HMPREF9684_1261 PE=3 SV=1	29	4165200	2716300	6	1	1	5	4	1	0	1	0	9.3	1.8	1.8	74.664	3.0949	2	2	350
788	E1LCT2|E1LCT2	tr|E1LCT2|E1LCT2_9FIRM	tr|E1LCT2|E1LCT2_9FIRM OstA-like protein OS=Veillonella atypica ACS-134-V-Col7a OX=866778 GN=HMPREF9684_1696 PE=4 SV=1	38	293930000	14836000	29	29	27	29	5	29	5	27	3	57.8	57.8	53.7	58.838	255.48	718	33	853
789	E1LDC7|E1LDC7	tr|E1LDC7|E1LDC7_9FIRM	tr|E1LDC7|E1LDC7_9FIRM Acyltransferase OS=Veillonella atypica ACS-134-V-Col7a OX=866778 GN=HMPREF9684_0177 PE=4 SV=1	16	37651000	2609800	11	11	7	9	4	9	4	6	0	48.5	48.5	30.6	23.302	21.296	113	23	200
790	E1LCV8|E1LCV8	tr|E1LCV8|E1LCV8_9FIRM	tr|E1LCV8|E1LCV8_9FIRM Lipid kinase, YegS/Rv2252/BmrU family OS=Veillonella atypica ACS-134-V-Col7a OX=866778 GN=HMPREF9684_0732 PE=3 SV=1	19	18085000	13099000	7	7	6	6	3	6	3	5	2	18	18	15	33.82	3.4024	7	3	11
791	D1BQ63|D1BQ63;E1L9Q7|E1L9Q7	tr|D1BQ63|D1BQ63_VEIPT;tr|E1L9Q7|E1L9Q7_9FIRM	tr|D1BQ63|D1BQ63_VEIPT Small GTP-binding protein OS=Veillonella parvula (strain ATCC 10790 / DSM 2008 / CCUG 5123 / JCM 12972 / NCTC 11810 / Te3) OX=479436 GN=Vpar_1846 PE=4 SV=1;tr|E1L9Q7|E1L9Q7_9FIRM Hydrogenase maturation GTPase HydF OS=Veillonella atyp	24	2505900	14061000	6	6	6	2	6	2	6	2	6	13.4	13.4	13.4	49.802	5.8746	3	13	21
792	D1BQ88|D1BQ88	tr|D1BQ88|D1BQ88_VEIPT	tr|D1BQ88|D1BQ88_VEIPT Uncharacterized protein OS=Veillonella parvula (strain ATCC 10790 / DSM 2008 / CCUG 5123 / JCM 12972 / NCTC 11810 / Te3) OX=479436 GN=Vpar_0012 PE=3 SV=1	18	5772200	6587500	5	4	4	1	4	0	3	0	3	12.6	10	10	50.143	6.9307	1	5	11
793	E1LAV6|E1LAV6	tr|E1LAV6|E1LAV6_9FIRM	tr|E1LAV6|E1LAV6_9FIRM FeS assembly protein SufB OS=Veillonella atypica ACS-134-V-Col7a OX=866778 GN=sufB PE=3 SV=1	25	8672200	8498900	9	9	2	7	5	7	5	2	0	17.7	17.7	4.3	52.252	21.271	10	7	19
794	E1LDY3|E1LDY3	tr|E1LDY3|E1LDY3_9FIRM	tr|E1LDY3|E1LDY3_9FIRM LemA family protein OS=Veillonella atypica ACS-134-V-Col7a OX=866778 GN=HMPREF9684_0941 PE=3 SV=1	18	764150000	43776000	13	13	13	13	2	13	2	13	2	57.7	57.7	57.7	27.148	323.31	471	0	471
795	D1BNS5|D1BNS5	tr|D1BNS5|D1BNS5_VEIPT	tr|D1BNS5|D1BNS5_VEIPT Uncharacterized protein OS=Veillonella parvula (strain ATCC 10790 / DSM 2008 / CCUG 5123 / JCM 12972 / NCTC 11810 / Te3) OX=479436 GN=Vpar_1354 PE=3 SV=1	14	2557500	13299000	9	9	3	5	8	5	8	0	3	46.4	46.4	15.8	24.136	33.642	35	33	84
796	D1BQJ5|D1BQJ5	tr|D1BQJ5|D1BQJ5_VEIPT	tr|D1BQJ5|D1BQJ5_VEIPT ABC transporter related protein OS=Veillonella parvula (strain ATCC 10790 / DSM 2008 / CCUG 5123 / JCM 12972 / NCTC 11810 / Te3) OX=479436 GN=Vpar_0119 PE=3 SV=1	21	8807700	19285000	12	12	10	1	11	1	11	0	10	23.5	23.5	20	58.82	92.954	2	23	68
797	D1BMG8|D1BMG8	tr|D1BMG8|D1BMG8_VEIPT	tr|D1BMG8|D1BMG8_VEIPT ABC transporter related protein OS=Veillonella parvula (strain ATCC 10790 / DSM 2008 / CCUG 5123 / JCM 12972 / NCTC 11810 / Te3) OX=479436 GN=Vpar_0894 PE=4 SV=1	30	866440	5668500	9	9	7	2	4	2	4	0	4	15.3	15.3	11.5	65.436	9.8257	2	6	18
798	D1BLL5|D1BLL5;E1LE39|E1LE39	tr|D1BLL5|D1BLL5_VEIPT;tr|E1LE39|E1LE39_9FIRM	tr|D1BLL5|D1BLL5_VEIPT Probable transcriptional regulatory protein Vpar_0589 OS=Veillonella parvula (strain ATCC 10790 / DSM 2008 / CCUG 5123 / JCM 12972 / NCTC 11810 / Te3) OX=479436 GN=Vpar_0589 PE=3 SV=1;tr|E1LE39|E1LE39_9FIRM Probable transcriptional r	10	4015300	10476000	5	5	5	2	4	2	4	2	4	20.8	20.8	20.8	26.631	7.5697	3	8	19
799	D1BQ66|D1BQ66;E1L9Q4|E1L9Q4	tr|D1BQ66|D1BQ66_VEIPT;tr|E1L9Q4|E1L9Q4_9FIRM	tr|D1BQ66|D1BQ66_VEIPT Vitamin B12 dependent methionine synthase activation region OS=Veillonella parvula (strain ATCC 10790 / DSM 2008 / CCUG 5123 / JCM 12972 / NCTC 11810 / Te3) OX=479436 GN=Vpar_1849 PE=4 SV=1;tr|E1L9Q4|E1L9Q4_9FIRM Vitamin B12 dependen	15	231340	7579200	4	4	4	2	3	2	3	2	3	12.5	12.5	12.5	28.285	3.0003	1	8	12
800	D1BNZ3|D1BNZ3	tr|D1BNZ3|D1BNZ3_VEIPT	tr|D1BNZ3|D1BNZ3_VEIPT Delta-aminolevulinic acid dehydratase OS=Veillonella parvula (strain ATCC 10790 / DSM 2008 / CCUG 5123 / JCM 12972 / NCTC 11810 / Te3) OX=479436 GN=Vpar_1423 PE=3 SV=1	18	1102300	15098000	9	9	5	3	9	3	9	0	5	27.8	27.8	18.5	35.986	57.709	1	15	24
801	E1LC79|E1LC79;E1LC83|E1LC83	tr|E1LC79|E1LC79_9FIRM;tr|E1LC83|E1LC83_9FIRM	tr|E1LC79|E1LC79_9FIRM Uncharacterized protein OS=Veillonella atypica ACS-134-V-Col7a OX=866778 GN=HMPREF9684_1960 PE=4 SV=1;tr|E1LC83|E1LC83_9FIRM Uncharacterized protein OS=Veillonella atypica ACS-134-V-Col7a OX=866778 GN=HMPREF9684_1964 PE=4 SV=1	12	149560000	4584600	8	8	8	8	1	8	1	8	1	48.5	48.5	48.5	22.913	140.85	76	15	91
802	E1LAS6|E1LAS6	tr|E1LAS6|E1LAS6_9FIRM	tr|E1LAS6|E1LAS6_9FIRM ATP-dependent DNA helicase OS=Veillonella atypica ACS-134-V-Col7a OX=866778 GN=pcrA PE=3 SV=1	48	24014000	8143300	26	4	4	19	12	4	0	4	0	35.3	5.5	5.5	82.177	4.602	44	11	76
803	D1BR50|D1BR50;E1LA45|E1LA45	tr|D1BR50|D1BR50_VEIPT;tr|E1LA45|E1LA45_9FIRM	tr|D1BR50|D1BR50_VEIPT Meso-diaminopimelate D-dehydrogenase OS=Veillonella parvula (strain ATCC 10790 / DSM 2008 / CCUG 5123 / JCM 12972 / NCTC 11810 / Te3) OX=479436 GN=Vpar_0329 PE=3 SV=1;tr|E1LA45|E1LA45_9FIRM Meso-diaminopimelate D-dehydrogenase OS=Vei	22	6703100	7455300	6	6	6	3	4	3	4	3	4	18.6	18.6	18.6	35.798	7.8764	5	7	16
804	E1LBH5|E1LBH5	tr|E1LBH5|E1LBH5_9FIRM	tr|E1LBH5|E1LBH5_9FIRM Uroporphyrinogen-III C-methyltransferase OS=Veillonella atypica ACS-134-V-Col7a OX=866778 GN=cobA PE=4 SV=1	27	25009000	6094400	12	9	9	10	3	9	0	9	0	32.1	24.2	24.2	54.693	54.765	18	20	43
805	E1LB76|E1LB76	tr|E1LB76|E1LB76_9FIRM	tr|E1LB76|E1LB76_9FIRM Trypsin OS=Veillonella atypica ACS-134-V-Col7a OX=866778 GN=HMPREF9684_1448 PE=3 SV=1	15	46084000	17611000	11	11	9	10	3	10	3	8	1	42.7	42.7	36.7	37.941	63.908	60	9	78
806	D1BMI4|D1BMI4	tr|D1BMI4|D1BMI4_VEIPT	tr|D1BMI4|D1BMI4_VEIPT Aminotransferase OS=Veillonella parvula (strain ATCC 10790 / DSM 2008 / CCUG 5123 / JCM 12972 / NCTC 11810 / Te3) OX=479436 GN=Vpar_0910 PE=3 SV=1	18	1190400	9694100	7	7	5	2	7	2	7	2	5	21.5	21.5	14.6	42.228	11.702	3	25	29
807	D1BMR6|D1BMR6	tr|D1BMR6|D1BMR6_VEIPT	tr|D1BMR6|D1BMR6_VEIPT PhoH family protein OS=Veillonella parvula (strain ATCC 10790 / DSM 2008 / CCUG 5123 / JCM 12972 / NCTC 11810 / Te3) OX=479436 GN=Vpar_0992 PE=4 SV=1	25	2835800	6115600	8	8	5	2	6	2	6	0	4	25	25	16.1	37.581	25.052	2	9	20
808	D1BNH8|D1BNH8	tr|D1BNH8|D1BNH8_VEIPT	tr|D1BNH8|D1BNH8_VEIPT Probable GTP-binding protein EngB OS=Veillonella parvula (strain ATCC 10790 / DSM 2008 / CCUG 5123 / JCM 12972 / NCTC 11810 / Te3) OX=479436 GN=engB PE=3 SV=1	15	2080400	24127000	5	5	2	1	5	1	5	0	2	22	22	10.3	26.122	6.9913	2	9	16
809	E1LDT0|E1LDT0	tr|E1LDT0|E1LDT0_9FIRM	tr|E1LDT0|E1LDT0_9FIRM Putative ATP synthase F0, A subunit OS=Veillonella atypica ACS-134-V-Col7a OX=866778 GN=HMPREF9684_0995 PE=4 SV=1	15	17049000	8430700	5	2	2	4	3	2	0	2	0	13.8	6.5	6.5	41.479	18.311	18	9	53
810	D1BQP0|D1BQP0	tr|D1BQP0|D1BQP0_VEIPT	tr|D1BQP0|D1BQP0_VEIPT Uncharacterized protein OS=Veillonella parvula (strain ATCC 10790 / DSM 2008 / CCUG 5123 / JCM 12972 / NCTC 11810 / Te3) OX=479436 GN=Vpar_0165 PE=4 SV=1	11	837160	11504000	5	5	5	1	3	1	3	1	3	16.6	16.6	16.6	33.269	27.028	0	3	19
811	E1LC26|E1LC26	tr|E1LC26|E1LC26_9FIRM	tr|E1LC26|E1LC26_9FIRM Ni/Fe-hydrogenase, b-type cytochrome subunit OS=Veillonella atypica ACS-134-V-Col7a OX=866778 GN=cybH PE=3 SV=1	12	19951000	4826500	7	2	2	6	4	2	1	2	1	22	9	9	31.516	-2	68	8	83
812	D1BQ67|D1BQ67	tr|D1BQ67|D1BQ67_VEIPT	tr|D1BQ67|D1BQ67_VEIPT Methionine synthase OS=Veillonella parvula (strain ATCC 10790 / DSM 2008 / CCUG 5123 / JCM 12972 / NCTC 11810 / Te3) OX=479436 GN=Vpar_1850 PE=3 SV=1	44	1164700	4628100	10	10	6	3	8	3	8	1	5	11.7	11.7	7.5	87.069	35.484	6	9	19
813	E1LAB5|E1LAB5	tr|E1LAB5|E1LAB5_9FIRM	tr|E1LAB5|E1LAB5_9FIRM Corrinoid adenosyltransferase OS=Veillonella atypica ACS-134-V-Col7a OX=866778 GN=HMPREF9684_1025 PE=3 SV=1	10	104610000	4085200	6	4	4	6	2	4	0	4	0	42.7	27.5	27.5	19.359	19.175	31	2	36
814	D1BLN1|D1BLN1	tr|D1BLN1|D1BLN1_VEIPT	tr|D1BLN1|D1BLN1_VEIPT 3D domain protein OS=Veillonella parvula (strain ATCC 10790 / DSM 2008 / CCUG 5123 / JCM 12972 / NCTC 11810 / Te3) OX=479436 GN=Vpar_0605 PE=4 SV=1	13	5851500	11985000	3	2	2	2	3	1	2	1	2	16.8	13.4	13.4	21.854	2.4041	2	6	8
815	D1BQY2|D1BQY2	tr|D1BQY2|D1BQY2_VEIPT	tr|D1BQY2|D1BQY2_VEIPT NLPA lipoprotein OS=Veillonella parvula (strain ATCC 10790 / DSM 2008 / CCUG 5123 / JCM 12972 / NCTC 11810 / Te3) OX=479436 GN=Vpar_0260 PE=3 SV=1	14	9755800	12594000	6	2	2	2	5	0	2	0	2	26.6	9.9	9.9	30.215	2.7153	3	4	13
816	D1BL80|D1BL80	tr|D1BL80|D1BL80_VEIPT	tr|D1BL80|D1BL80_VEIPT ATPase AAA-2 domain protein OS=Veillonella parvula (strain ATCC 10790 / DSM 2008 / CCUG 5123 / JCM 12972 / NCTC 11810 / Te3) OX=479436 GN=Vpar_0453 PE=4 SV=1	48	47510000	7579500	18	4	4	13	11	0	3	0	3	28.2	6.1	6.1	79.227	44.376	34	13	56
817	D1BNS4|D1BNS4;E1LAI0|E1LAI0	tr|D1BNS4|D1BNS4_VEIPT;tr|E1LAI0|E1LAI0_9FIRM	tr|D1BNS4|D1BNS4_VEIPT Phosphate transporter OS=Veillonella parvula (strain ATCC 10790 / DSM 2008 / CCUG 5123 / JCM 12972 / NCTC 11810 / Te3) OX=479436 GN=Vpar_1353 PE=4 SV=1;tr|E1LAI0|E1LAI0_9FIRM Phosphate transporter family protein OS=Veillonella atypic	10	39215000	16702000	2	2	2	2	2	2	2	2	2	4.8	4.8	4.8	35.106	4.8941	4	3	13
818	E1LAS5|E1LAS5	tr|E1LAS5|E1LAS5_9FIRM	tr|E1LAS5|E1LAS5_9FIRM DNA ligase OS=Veillonella atypica ACS-134-V-Col7a OX=866778 GN=ligA PE=3 SV=1	44	3534900	396610	9	9	6	8	3	8	3	5	2	14	14	9.6	74.124	10.521	14	17	33
819	E1LD27|E1LD27;D1BPW7|D1BPW7	tr|E1LD27|E1LD27_9FIRM;tr|D1BPW7|D1BPW7_VEIPT	tr|E1LD27|E1LD27_9FIRM Transcriptional regulator, ArsR family OS=Veillonella atypica ACS-134-V-Col7a OX=866778 GN=HMPREF9684_0361 PE=4 SV=1;tr|D1BPW7|D1BPW7_VEIPT Transcriptional regulator, ArsR family OS=Veillonella parvula (strain ATCC 10790 / DSM 2008 /	8	37084000	18820000	5	5	5	5	4	5	4	5	4	36.8	36.8	36.8	13.066	6.7086	18	14	43
820	E1LBU1|E1LBU1	tr|E1LBU1|E1LBU1_9FIRM	tr|E1LBU1|E1LBU1_9FIRM AAA_15 domain-containing protein OS=Veillonella atypica ACS-134-V-Col7a OX=866778 GN=HMPREF9684_0427 PE=4 SV=1	36	8107100	1953600	7	7	4	7	2	7	2	4	0	11.5	11.5	7.4	64.894	12.091	17	0	21
821	D1BNK3|D1BNK3	tr|D1BNK3|D1BNK3_VEIPT	tr|D1BNK3|D1BNK3_VEIPT ATP-dependent endonuclease of the OLD family-like protein OS=Veillonella parvula (strain ATCC 10790 / DSM 2008 / CCUG 5123 / JCM 12972 / NCTC 11810 / Te3) OX=479436 GN=Vpar_1280 PE=4 SV=1	36	6190900	4345700	6	3	3	4	5	1	3	1	3	9.4	5.2	5.2	63.846	4.0543	7	3	16
822	E1LBA2|E1LBA2	tr|E1LBA2|E1LBA2_9FIRM	tr|E1LBA2|E1LBA2_9FIRM Uncharacterized protein OS=Veillonella atypica ACS-134-V-Col7a OX=866778 GN=HMPREF9684_1475 PE=4 SV=1	21	480780000	18309000	14	12	12	14	9	12	7	12	7	49.8	44.9	44.9	30.754	76.423	151	67	249
823	E1LB49|E1LB49	tr|E1LB49|E1LB49_9FIRM	tr|E1LB49|E1LB49_9FIRM tRNA-specific 2-thiouridylase MnmA OS=Veillonella atypica ACS-134-V-Col7a OX=866778 GN=trmU PE=3 SV=1	23	62626000	12219000	10	10	1	10	8	10	8	1	0	27.2	27.2	4.5	39.709	41.527	89	6	107
824	E1LCD6|E1LCD6	tr|E1LCD6|E1LCD6_9FIRM	tr|E1LCD6|E1LCD6_9FIRM Putative enoyl-[acyl-carrier-protein] reductase II OS=Veillonella atypica ACS-134-V-Col7a OX=866778 GN=HMPREF9684_1747 PE=4 SV=1	14	220520000	13492000	11	11	8	11	6	11	6	8	3	41.1	41.1	29.6	33.244	133.25	241	11	276
825	D1BMZ0|D1BMZ0	tr|D1BMZ0|D1BMZ0_VEIPT	tr|D1BMZ0|D1BMZ0_VEIPT Peptidase U32 OS=Veillonella parvula (strain ATCC 10790 / DSM 2008 / CCUG 5123 / JCM 12972 / NCTC 11810 / Te3) OX=479436 GN=Vpar_1066 PE=4 SV=1	44	689560	4798300	7	5	5	1	6	0	4	0	4	7.8	5.8	5.8	89.044	2.9181	1	9	12
826	D1BLI9|D1BLI9	tr|D1BLI9|D1BLI9_VEIPT	tr|D1BLI9|D1BLI9_VEIPT Aspartate carbamoyltransferase OS=Veillonella parvula (strain ATCC 10790 / DSM 2008 / CCUG 5123 / JCM 12972 / NCTC 11810 / Te3) OX=479436 GN=pyrB PE=3 SV=1	23	7982100	7216600	8	5	5	3	7	0	5	0	5	25.9	18	18	34.564	4.827	25	8	35
827	D1BPT8|D1BPT8	tr|D1BPT8|D1BPT8_VEIPT	tr|D1BPT8|D1BPT8_VEIPT FAD-dependent pyridine nucleotide-disulphide oxidoreductase OS=Veillonella parvula (strain ATCC 10790 / DSM 2008 / CCUG 5123 / JCM 12972 / NCTC 11810 / Te3) OX=479436 GN=Vpar_1719 PE=4 SV=1	28	9246400	17092000	15	15	8	7	12	7	12	1	7	41.8	41.8	23.1	49.13	92.223	24	19	72
828	E1LBB8|E1LBB8	tr|E1LBB8|E1LBB8_9FIRM	tr|E1LBB8|E1LBB8_9FIRM ATPase family associated with various cellular activities (AAA) OS=Veillonella atypica ACS-134-V-Col7a OX=866778 GN=HMPREF9684_1494 PE=4 SV=1	50	49039000	5457900	20	20	6	19	8	19	8	6	0	32.1	32.1	10.6	80.886	102.44	46	9	63
829	D1BMG1|D1BMG1;E1LB60|E1LB60	tr|D1BMG1|D1BMG1_VEIPT	tr|D1BMG1|D1BMG1_VEIPT Histidine triad (HIT) protein OS=Veillonella parvula (strain ATCC 10790 / DSM 2008 / CCUG 5123 / JCM 12972 / NCTC 11810 / Te3) OX=479436 GN=Vpar_0887 PE=4 SV=1	10	2575900	23657000	7	7	7	2	7	2	7	2	7	48.2	48.2	48.2	12.77	8.2645	2	20	26
830	D1BPN8|D1BPN8	tr|D1BPN8|D1BPN8_VEIPT	tr|D1BPN8|D1BPN8_VEIPT Diacylglycerol kinase catalytic region OS=Veillonella parvula (strain ATCC 10790 / DSM 2008 / CCUG 5123 / JCM 12972 / NCTC 11810 / Te3) OX=479436 GN=Vpar_1669 PE=3 SV=1	18	4627500	20797000	6	5	5	1	6	0	5	0	5	16	13.1	13.1	34.645	74.444	2	11	15
831	D1BMY9|D1BMY9	tr|D1BMY9|D1BMY9_VEIPT	tr|D1BMY9|D1BMY9_VEIPT Endonuclease MutS2 OS=Veillonella parvula (strain ATCC 10790 / DSM 2008 / CCUG 5123 / JCM 12972 / NCTC 11810 / Te3) OX=479436 GN=mutS2 PE=3 SV=1	44	707950	9504900	23	23	12	2	13	2	13	0	5	32.2	32.2	19.2	89.204	131.28	1	18	72
832	D1BNI1|D1BNI1;E1LBV3|E1LBV3	tr|D1BNI1|D1BNI1_VEIPT;tr|E1LBV3|E1LBV3_9FIRM	tr|D1BNI1|D1BNI1_VEIPT ATP-dependent Clp protease proteolytic subunit OS=Veillonella parvula (strain ATCC 10790 / DSM 2008 / CCUG 5123 / JCM 12972 / NCTC 11810 / Te3) OX=479436 GN=clpP PE=3 SV=1;tr|E1LBV3|E1LBV3_9FIRM ATP-dependent Clp protease proteolytic	11	4748500	22580000	5	5	5	3	5	3	5	3	5	29.4	29.4	29.4	21.639	7.3348	4	12	21
833	E1LD21|E1LD21	tr|E1LD21|E1LD21_9FIRM	tr|E1LD21|E1LD21_9FIRM DUF2262 domain-containing protein OS=Veillonella atypica ACS-134-V-Col7a OX=866778 GN=HMPREF9684_0354 PE=4 SV=1	15	62375000	8718700	11	11	6	11	6	11	6	6	2	43.5	43.5	21.4	31.211	111.54	120	54	180
834	D1BMT9|D1BMT9	tr|D1BMT9|D1BMT9_VEIPT	tr|D1BMT9|D1BMT9_VEIPT Cysteine--tRNA ligase OS=Veillonella parvula (strain ATCC 10790 / DSM 2008 / CCUG 5123 / JCM 12972 / NCTC 11810 / Te3) OX=479436 GN=cysS PE=3 SV=1	31	1151500	11585000	9	9	5	2	7	2	7	0	3	19.9	19.9	11.4	55.228	34.905	1	14	21
835	D1BQ70|D1BQ70;E1L9P8|E1L9P8	tr|D1BQ70|D1BQ70_VEIPT;tr|E1L9P8|E1L9P8_9FIRM	tr|D1BQ70|D1BQ70_VEIPT tRNA uridine 5-carboxymethylaminomethyl modification enzyme MnmG OS=Veillonella parvula (strain ATCC 10790 / DSM 2008 / CCUG 5123 / JCM 12972 / NCTC 11810 / Te3) OX=479436 GN=mnmG PE=3 SV=1;tr|E1L9P8|E1L9P8_9FIRM tRNA uridine 5-carbo	37	1301200	5483100	12	12	12	3	10	3	10	3	10	18.6	18.6	18.6	69.39	12.814	2	20	26
836	D1BNI8|D1BNI8	tr|D1BNI8|D1BNI8_VEIPT	tr|D1BNI8|D1BNI8_VEIPT Selenium-dependent molybdenum hydroxylase 1 OS=Veillonella parvula (strain ATCC 10790 / DSM 2008 / CCUG 5123 / JCM 12972 / NCTC 11810 / Te3) OX=479436 GN=Vpar_1265 PE=3 SV=1	48	6611800	3963700	24	24	24	3	15	3	15	3	15	30	30	30	91.839	106.69	1	19	131
837	E1LE65|E1LE65	tr|E1LE65|E1LE65_9FIRM	tr|E1LE65|E1LE65_9FIRM Aspartate carbamoyltransferase OS=Veillonella atypica ACS-134-V-Col7a OX=866778 GN=pyrB PE=3 SV=1	24	11090000	2801500	8	8	5	8	2	8	2	5	0	23.4	23.4	15.5	34.686	10.394	40	2	43
838	E1LBG1|E1LBG1;D1BNU3|D1BNU3	tr|E1LBG1|E1LBG1_9FIRM;tr|D1BNU3|D1BNU3_VEIPT	tr|E1LBG1|E1LBG1_9FIRM ThiF family protein OS=Veillonella atypica ACS-134-V-Col7a OX=866778 GN=HMPREF9684_1935 PE=4 SV=1;tr|D1BNU3|D1BNU3_VEIPT UBA/THIF-type NAD/FAD binding protein OS=Veillonella parvula (strain ATCC 10790 / DSM 2008 / CCUG 5123 / JCM 129	14	900160	891670	4	4	4	3	2	3	2	3	2	17	17	17	25.804	2.6916	1	1	4
839	D1BLJ5|D1BLJ5	tr|D1BLJ5|D1BLJ5_VEIPT	tr|D1BLJ5|D1BLJ5_VEIPT Transcriptional regulator, LysR family OS=Veillonella parvula (strain ATCC 10790 / DSM 2008 / CCUG 5123 / JCM 12972 / NCTC 11810 / Te3) OX=479436 GN=Vpar_0569 PE=3 SV=1	17	14814000	5498200	6	2	2	4	3	1	1	1	1	25.3	5.7	5.7	33.421	2.4761	9	6	20
840	E1LDD0|E1LDD0	tr|E1LDD0|E1LDD0_9FIRM	tr|E1LDD0|E1LDD0_9FIRM Glycerol-3-phosphate acyltransferase OS=Veillonella atypica ACS-134-V-Col7a OX=866778 GN=plsY PE=3 SV=1	4	213150000	21209000	2	1	1	2	2	1	1	1	1	8.5	4.5	4.5	21.689	2.5848	30	8	39
841	E1LAT4|E1LAT4;D1BMT2|D1BMT2	tr|E1LAT4|E1LAT4_9FIRM	tr|E1LAT4|E1LAT4_9FIRM SsrA-binding protein OS=Veillonella atypica ACS-134-V-Col7a OX=866778 GN=smpB PE=3 SV=1	8	15669000	7531200	3	3	3	3	1	3	1	3	1	15.4	15.4	15.4	18.217	1.9705	5	2	9
842	D1BM98|D1BM98	tr|D1BM98|D1BM98_VEIPT	tr|D1BM98|D1BM98_VEIPT Sulfatase OS=Veillonella parvula (strain ATCC 10790 / DSM 2008 / CCUG 5123 / JCM 12972 / NCTC 11810 / Te3) OX=479436 GN=Vpar_0824 PE=4 SV=1	24	1250300	6666700	4	3	3	1	2	0	1	0	1	10.2	9	9	70.107	26.539	2	4	13
843	E1LAK9|E1LAK9	tr|E1LAK9|E1LAK9_9FIRM	tr|E1LAK9|E1LAK9_9FIRM Penicillin-binding protein, transpeptidase domain protein OS=Veillonella atypica ACS-134-V-Col7a OX=866778 GN=HMPREF9684_1069 PE=3 SV=1	51	10374000	484280	9	7	7	8	2	6	0	6	0	14	10.8	10.8	70.137	17.457	12	5	20
844	D1BNE7|D1BNE7	tr|D1BNE7|D1BNE7_VEIPT	tr|D1BNE7|D1BNE7_VEIPT Penicillin-binding protein 2 OS=Veillonella parvula (strain ATCC 10790 / DSM 2008 / CCUG 5123 / JCM 12972 / NCTC 11810 / Te3) OX=479436 GN=Vpar_1224 PE=3 SV=1	46	777290	8792200	20	20	19	1	8	1	8	1	8	28.4	28.4	26.6	69.827	109.3	0	20	52
845	D1BPV7|D1BPV7	tr|D1BPV7|D1BPV7_VEIPT	tr|D1BPV7|D1BPV7_VEIPT DUF2262 domain-containing protein OS=Veillonella parvula (strain ATCC 10790 / DSM 2008 / CCUG 5123 / JCM 12972 / NCTC 11810 / Te3) OX=479436 GN=Vpar_1738 PE=4 SV=1	16	16879000	7193200	7	2	2	5	6	0	2	0	2	29.5	7.4	7.4	31.264	-2	80	56	141
846	E1LBU4|E1LBU4	tr|E1LBU4|E1LBU4_9FIRM	tr|E1LBU4|E1LBU4_9FIRM Glutamine--tRNA ligase OS=Veillonella atypica ACS-134-V-Col7a OX=866778 GN=glnS PE=3 SV=1	41	7477100	3572700	9	5	5	5	5	5	2	5	2	14.4	9.3	9.3	64.633	7.3992	8	4	17
847	E1LD28|E1LD28	tr|E1LD28|E1LD28_9FIRM	tr|E1LD28|E1LD28_9FIRM Adenylosuccinate synthetase OS=Veillonella atypica ACS-134-V-Col7a OX=866778 GN=purA PE=3 SV=1	26	11358000	5803800	9	5	5	7	5	4	1	4	1	23.7	11.2	11.2	46.698	5.6256	27	15	54
848	D1BMX4|D1BMX4	tr|D1BMX4|D1BMX4_VEIPT	tr|D1BMX4|D1BMX4_VEIPT Glycosyl transferase family 2 OS=Veillonella parvula (strain ATCC 10790 / DSM 2008 / CCUG 5123 / JCM 12972 / NCTC 11810 / Te3) OX=479436 GN=Vpar_1050 PE=4 SV=1	19	4156000	3053900	11	11	8	3	6	3	6	1	4	30.5	30.5	20.2	48.532	124.99	4	13	71
849	D1BPI4|D1BPI4	tr|D1BPI4|D1BPI4_VEIPT	tr|D1BPI4|D1BPI4_VEIPT Shikimate kinase OS=Veillonella parvula (strain ATCC 10790 / DSM 2008 / CCUG 5123 / JCM 12972 / NCTC 11810 / Te3) OX=479436 GN=aroK PE=3 SV=1	23	88682000	4137600	9	2	2	7	4	1	1	1	1	18.2	3.2	3.2	45.477	-2	167	13	195
850	D1BLN9|D1BLN9	tr|D1BLN9|D1BLN9_VEIPT	tr|D1BLN9|D1BLN9_VEIPT PSP1 domain protein OS=Veillonella parvula (strain ATCC 10790 / DSM 2008 / CCUG 5123 / JCM 12972 / NCTC 11810 / Te3) OX=479436 GN=Vpar_0613 PE=4 SV=1	18	41433000	5053600	11	4	4	6	7	0	3	0	3	39.1	16.7	16.7	31.621	12.898	10	12	26
851	E1LAU3|E1LAU3	tr|E1LAU3|E1LAU3_9FIRM	tr|E1LAU3|E1LAU3_9FIRM Glutamate--tRNA ligase OS=Veillonella atypica ACS-134-V-Col7a OX=866778 GN=gltX PE=3 SV=1	29	6054400	4006100	7	7	3	4	5	4	5	2	1	14	14	5.1	55.286	9.9532	8	12	22
852	D1BM52|D1BM52	tr|D1BM52|D1BM52_VEIPT	tr|D1BM52|D1BM52_VEIPT DNA polymerase I OS=Veillonella parvula (strain ATCC 10790 / DSM 2008 / CCUG 5123 / JCM 12972 / NCTC 11810 / Te3) OX=479436 GN=polA PE=3 SV=1	53	1515500	6087900	15	15	7	7	12	7	12	0	7	16.5	16.5	6.8	97.898	38.4	11	23	58
853	E1LCP1|E1LCP1	tr|E1LCP1|E1LCP1_9FIRM	tr|E1LCP1|E1LCP1_9FIRM DNA polymerase I OS=Veillonella atypica ACS-134-V-Col7a OX=866778 GN=polA PE=3 SV=1	56	1434300	3392100	12	4	4	11	5	4	0	4	0	14	4.4	4.4	99.169	2.0941	15	12	48
854	E1LAP3|E1LAP3	tr|E1LAP3|E1LAP3_9FIRM	tr|E1LAP3|E1LAP3_9FIRM Leucine--tRNA ligase OS=Veillonella atypica ACS-134-V-Col7a OX=866778 GN=leuS PE=3 SV=1	52	3513800	5895200	12	12	4	7	10	7	10	4	2	11.8	11.8	4.1	94.474	9.118	8	12	22
855	E1LAR6|E1LAR6;D1BMR4|D1BMR4	tr|E1LAR6|E1LAR6_9FIRM;tr|D1BMR4|D1BMR4_VEIPT	tr|E1LAR6|E1LAR6_9FIRM GTPase Era OS=Veillonella atypica ACS-134-V-Col7a OX=866778 GN=era PE=3 SV=1;tr|D1BMR4|D1BMR4_VEIPT GTPase Era OS=Veillonella parvula (strain ATCC 10790 / DSM 2008 / CCUG 5123 / JCM 12972 / NCTC 11810 / Te3) OX=479436 GN=era PE=3 SV=	20	4607900	10669000	5	5	5	3	4	3	4	3	4	15.1	15.1	15.1	33.608	3.6719	7	6	19
856	E1LB50|E1LB50;D1BMF1|D1BMF1	tr|E1LB50|E1LB50_9FIRM;tr|D1BMF1|D1BMF1_VEIPT	tr|E1LB50|E1LB50_9FIRM Elongation factor 4 OS=Veillonella atypica ACS-134-V-Col7a OX=866778 GN=lepA PE=3 SV=1;tr|D1BMF1|D1BMF1_VEIPT Elongation factor 4 OS=Veillonella parvula (strain ATCC 10790 / DSM 2008 / CCUG 5123 / JCM 12972 / NCTC 11810 / Te3) OX=479	31	13786000	7684700	10	10	10	8	8	8	8	8	8	18.7	18.7	18.7	66.714	68.131	16	12	45
857	D1BM65|D1BM65	tr|D1BM65|D1BM65_VEIPT	tr|D1BM65|D1BM65_VEIPT Shikimate kinase OS=Veillonella parvula (strain ATCC 10790 / DSM 2008 / CCUG 5123 / JCM 12972 / NCTC 11810 / Te3) OX=479436 GN=aroK PE=3 SV=1	16	1226800	15140000	7	7	6	1	6	1	6	1	5	30.7	30.7	26	29.099	19.753	0	26	42
858	D1BLP2|D1BLP2	tr|D1BLP2|D1BLP2_VEIPT	tr|D1BLP2|D1BLP2_VEIPT Methionine--tRNA ligase OS=Veillonella parvula (strain ATCC 10790 / DSM 2008 / CCUG 5123 / JCM 12972 / NCTC 11810 / Te3) OX=479436 GN=metG PE=3 SV=1	42	1620100	9688800	17	17	8	5	12	5	12	0	6	32.4	32.4	16.5	73.791	120.5	8	19	51
859	D1BLC4|D1BLC4	tr|D1BLC4|D1BLC4_VEIPT	tr|D1BLC4|D1BLC4_VEIPT Lactate/malate dehydrogenase OS=Veillonella parvula (strain ATCC 10790 / DSM 2008 / CCUG 5123 / JCM 12972 / NCTC 11810 / Te3) OX=479436 GN=Vpar_0498 PE=3 SV=1	15	2327900	9940500	5	4	4	3	4	2	3	2	3	16.5	13.3	13.3	34.537	5.7214	15	11	27
860	D1BR42|D1BR42	tr|D1BR42|D1BR42_VEIPT	tr|D1BR42|D1BR42_VEIPT Nitroreductase OS=Veillonella parvula (strain ATCC 10790 / DSM 2008 / CCUG 5123 / JCM 12972 / NCTC 11810 / Te3) OX=479436 GN=Vpar_0321 PE=3 SV=1	16	2483300	8211700	6	6	5	1	6	1	6	1	5	25.5	25.5	22.6	27.166	5.38	1	8	9
861	D1BNM1|D1BNM1	tr|D1BNM1|D1BNM1_VEIPT	tr|D1BNM1|D1BNM1_VEIPT Molybdopterin-guanine dinucleotide biosynthesis protein OS=Veillonella parvula (strain ATCC 10790 / DSM 2008 / CCUG 5123 / JCM 12972 / NCTC 11810 / Te3) OX=479436 GN=Vpar_1299 PE=4 SV=1	16	11590000	8958400	6	6	6	2	5	2	5	2	5	15.5	15.5	15.5	41.362	8.1318	2	4	11
862	E1LBJ9|E1LBJ9;D1BP18|D1BP18	tr|E1LBJ9|E1LBJ9_9FIRM;tr|D1BP18|D1BP18_VEIPT	tr|E1LBJ9|E1LBJ9_9FIRM Enoyl-CoA hydratase/isomerase family protein OS=Veillonella atypica ACS-134-V-Col7a OX=866778 GN=HMPREF9684_0610 PE=3 SV=1;tr|D1BP18|D1BP18_VEIPT Enoyl-CoA hydratase/isomerase OS=Veillonella parvula (strain ATCC 10790 / DSM 2008 / CC	16	1035800	4103200	5	5	5	2	5	2	5	2	5	18.6	18.6	18.6	29.145	5.7349	2	5	14
863	D1BNJ1|D1BNJ1	tr|D1BNJ1|D1BNJ1_VEIPT	tr|D1BNJ1|D1BNJ1_VEIPT Selenium metabolism protein SsnA OS=Veillonella parvula (strain ATCC 10790 / DSM 2008 / CCUG 5123 / JCM 12972 / NCTC 11810 / Te3) OX=479436 GN=Vpar_1268 PE=4 SV=1	21	197860	4836900	3	3	3	1	3	1	3	1	3	5.4	5.4	5.4	47.967	2.6959	0	4	8
864	D1BMN8|D1BMN8	tr|D1BMN8|D1BMN8_VEIPT	tr|D1BMN8|D1BMN8_VEIPT Leucine--tRNA ligase OS=Veillonella parvula (strain ATCC 10790 / DSM 2008 / CCUG 5123 / JCM 12972 / NCTC 11810 / Te3) OX=479436 GN=leuS PE=3 SV=1	53	1697800	6223300	12	4	4	3	12	0	4	0	4	11.7	4	4	94.792	3.7532	4	14	19
865	D1BNW3|D1BNW3	tr|D1BNW3|D1BNW3_VEIPT	tr|D1BNW3|D1BNW3_VEIPT Uncharacterized protein OS=Veillonella parvula (strain ATCC 10790 / DSM 2008 / CCUG 5123 / JCM 12972 / NCTC 11810 / Te3) OX=479436 GN=Vpar_1392 PE=4 SV=1	11	972550	7328800	4	4	3	1	2	1	2	0	1	31.7	31.7	27.3	15.831	59.499	0	3	10
866	D1BLN2|D1BLN2	tr|D1BLN2|D1BLN2_VEIPT	tr|D1BLN2|D1BLN2_VEIPT Pur operon repressor OS=Veillonella parvula (strain ATCC 10790 / DSM 2008 / CCUG 5123 / JCM 12972 / NCTC 11810 / Te3) OX=479436 GN=Vpar_0606 PE=3 SV=1	20	27386000	9663900	10	10	2	8	7	8	7	0	2	30.5	30.5	7	30.179	10.888	31	9	41
867	D1BNF0|D1BNF0	tr|D1BNF0|D1BNF0_VEIPT	tr|D1BNF0|D1BNF0_VEIPT Cell shape-determining protein MreB OS=Veillonella parvula (strain ATCC 10790 / DSM 2008 / CCUG 5123 / JCM 12972 / NCTC 11810 / Te3) OX=479436 GN=mreB PE=3 SV=1	23	1207300	12015000	8	8	8	2	8	2	8	2	8	29.6	29.6	29.6	37.16	15.881	0	25	35
868	E1LDL1|E1LDL1;D1BQY4|D1BQY4	tr|E1LDL1|E1LDL1_9FIRM;tr|D1BQY4|D1BQY4_VEIPT	tr|E1LDL1|E1LDL1_9FIRM Transporter, DASS family OS=Veillonella atypica ACS-134-V-Col7a OX=866778 GN=HMPREF9684_1265 PE=3 SV=1;tr|D1BQY4|D1BQY4_VEIPT Anion transporter OS=Veillonella parvula (strain ATCC 10790 / DSM 2008 / CCUG 5123 / JCM 12972 / NCTC 11810	15	2307900	4238300	3	3	3	2	3	2	3	2	3	5.1	5.1	5.1	52.258	2.355	1	3	5
869	D1BLQ3|D1BLQ3	tr|D1BLQ3|D1BLQ3_VEIPT	tr|D1BLQ3|D1BLQ3_VEIPT Sodium/glutamate symporter OS=Veillonella parvula (strain ATCC 10790 / DSM 2008 / CCUG 5123 / JCM 12972 / NCTC 11810 / Te3) OX=479436 GN=Vpar_0627 PE=3 SV=1	8	98480000	4748300	2	1	1	1	2	0	1	0	1	8	6.3	6.3	44.072	40.4	18	9	29
870	D1BPE1|D1BPE1	tr|D1BPE1|D1BPE1_VEIPT	tr|D1BPE1|D1BPE1_VEIPT Uncharacterized protein OS=Veillonella parvula (strain ATCC 10790 / DSM 2008 / CCUG 5123 / JCM 12972 / NCTC 11810 / Te3) OX=479436 GN=Vpar_1572 PE=4 SV=1	7	3289700	39896000	5	5	4	1	5	1	5	0	4	56.5	56.5	45.7	10.41	15.673	1	13	17
871	D1BMG0|D1BMG0	tr|D1BMG0|D1BMG0_VEIPT	tr|D1BMG0|D1BMG0_VEIPT MiaB-like tRNA modifying enzyme OS=Veillonella parvula (strain ATCC 10790 / DSM 2008 / CCUG 5123 / JCM 12972 / NCTC 11810 / Te3) OX=479436 GN=Vpar_0886 PE=4 SV=1	23	1566100	8539600	10	5	5	5	6	0	4	0	4	24.4	13.9	13.9	48.474	18.617	22	9	39
872	D1BPN4|D1BPN4	tr|D1BPN4|D1BPN4_VEIPT	tr|D1BPN4|D1BPN4_VEIPT Molybdopterin molybdenumtransferase OS=Veillonella parvula (strain ATCC 10790 / DSM 2008 / CCUG 5123 / JCM 12972 / NCTC 11810 / Te3) OX=479436 GN=Vpar_1665 PE=3 SV=1	19	397450	6406200	5	2	2	1	5	0	2	0	2	15	8	8	35.306	4.7149	0	12	18
873	D1BQV8|D1BQV8	tr|D1BQV8|D1BQV8_VEIPT	tr|D1BQV8|D1BQV8_VEIPT ATP-dependent dethiobiotin synthetase BioD OS=Veillonella parvula (strain ATCC 10790 / DSM 2008 / CCUG 5123 / JCM 12972 / NCTC 11810 / Te3) OX=479436 GN=bioD PE=3 SV=1	19	6016400	9246300	10	10	8	4	6	4	6	3	5	43.6	43.6	35.2	26.969	22.357	2	4	24
874	E1LCR0|E1LCR0	tr|E1LCR0|E1LCR0_9FIRM	tr|E1LCR0|E1LCR0_9FIRM Sodium/glutamate symporter OS=Veillonella atypica ACS-134-V-Col7a OX=866778 GN=HMPREF9684_1674 PE=3 SV=1	9	106570000	4220700	5	5	4	5	1	5	1	4	0	11.1	11.1	9.4	44.157	169.79	62	8	72
875	D1BNZ8|D1BNZ8;E1LBH9|E1LBH9	tr|D1BNZ8|D1BNZ8_VEIPT;tr|E1LBH9|E1LBH9_9FIRM	tr|D1BNZ8|D1BNZ8_VEIPT RNA-binding S4 domain protein OS=Veillonella parvula (strain ATCC 10790 / DSM 2008 / CCUG 5123 / JCM 12972 / NCTC 11810 / Te3) OX=479436 GN=Vpar_1428 PE=4 SV=1;tr|E1LBH9|E1LBH9_9FIRM S4 domain protein OS=Veillonella atypica ACS-134-V	18	6729900	8136900	7	7	7	6	3	6	3	6	3	29.5	29.5	29.5	28.491	15.108	5	3	11
876	D1BKY2|D1BKY2	tr|D1BKY2|D1BKY2_VEIPT	tr|D1BKY2|D1BKY2_VEIPT Major facilitator superfamily MFS_1 OS=Veillonella parvula (strain ATCC 10790 / DSM 2008 / CCUG 5123 / JCM 12972 / NCTC 11810 / Te3) OX=479436 GN=Vpar_0355 PE=4 SV=1	16	11429000	3372200	4	4	3	2	3	2	3	1	3	7.2	7.2	5.3	45.362	3.406	5	4	11
877	D1BPB2|D1BPB2;E1LDS9|E1LDS9	tr|D1BPB2|D1BPB2_VEIPT;tr|E1LDS9|E1LDS9_9FIRM	tr|D1BPB2|D1BPB2_VEIPT UPF0210 protein Vpar_1543 OS=Veillonella parvula (strain ATCC 10790 / DSM 2008 / CCUG 5123 / JCM 12972 / NCTC 11810 / Te3) OX=479436 GN=Vpar_1543 PE=3 SV=1;tr|E1LDS9|E1LDS9_9FIRM UPF0210 protein HMPREF9684_0994 OS=Veillonella atypica	16	10051000	11309000	4	4	4	3	4	3	4	3	4	8.4	8.4	8.4	46.972	4.2574	5	5	11
878	E1LAK8|E1LAK8	tr|E1LAK8|E1LAK8_9FIRM	tr|E1LAK8|E1LAK8_9FIRM HDIG domain protein OS=Veillonella atypica ACS-134-V-Col7a OX=866778 GN=HMPREF9684_1068 PE=3 SV=1	35	3223800	4230600	7	7	5	5	3	5	3	4	2	12.1	12.1	8.5	53.453	5.2467	7	1	10
879	E1LCK2|E1LCK2;D1BM19|D1BM19	tr|E1LCK2|E1LCK2_9FIRM;tr|D1BM19|D1BM19_VEIPT	tr|E1LCK2|E1LCK2_9FIRM Branched-chain-amino-acid transaminase OS=Veillonella atypica ACS-134-V-Col7a OX=866778 GN=ilvE PE=3 SV=1;tr|D1BM19|D1BM19_VEIPT Branched-chain-amino-acid transaminase OS=Veillonella parvula (strain ATCC 10790 / DSM 2008 / CCUG 5123	19	1923700	3394100	3	3	3	3	2	3	2	3	2	11.2	11.2	11.2	37.709	4.3158	3	6	11
880	E1LCG6|E1LCG6	tr|E1LCG6|E1LCG6_9FIRM	tr|E1LCG6|E1LCG6_9FIRM Pur operon repressor OS=Veillonella atypica ACS-134-V-Col7a OX=866778 GN=purR PE=3 SV=1	18	41182000	6376400	9	1	1	9	5	1	0	1	0	26.6	3.3	3.3	30.69	3.5001	32	6	39
881	D1BNX4|D1BNX4	tr|D1BNX4|D1BNX4_VEIPT	tr|D1BNX4|D1BNX4_VEIPT Transcriptional regulator, LysR family OS=Veillonella parvula (strain ATCC 10790 / DSM 2008 / CCUG 5123 / JCM 12972 / NCTC 11810 / Te3) OX=479436 GN=Vpar_1403 PE=3 SV=1	20	3651800	6488300	7	7	5	2	7	2	7	1	5	21.1	21.1	15.8	34.451	8.9133	3	11	16
882	E1LBJ4|E1LBJ4	tr|E1LBJ4|E1LBJ4_9FIRM	tr|E1LBJ4|E1LBJ4_9FIRM Transporter, DASS family OS=Veillonella atypica ACS-134-V-Col7a OX=866778 GN=HMPREF9684_0605 PE=3 SV=1	15	20635000	7760200	5	1	1	3	2	1	0	1	0	9	2.4	2.4	50.624	-2	15	6	40
883	E1LEA4|E1LEA4	tr|E1LEA4|E1LEA4_9FIRM	tr|E1LEA4|E1LEA4_9FIRM Putative virulence factor Mce family protein OS=Veillonella atypica ACS-134-V-Col7a OX=866778 GN=HMPREF9684_1170 PE=4 SV=1	26	63181000	5312000	8	7	7	8	2	7	1	7	1	20.8	19.3	19.3	45.235	72.847	80	1	82
884	E1L9Y5|E1L9Y5;D1BPH6|D1BPH6	tr|E1L9Y5|E1L9Y5_9FIRM;tr|D1BPH6|D1BPH6_VEIPT	tr|E1L9Y5|E1L9Y5_9FIRM Ribonucleoside-diphosphate reductase subunit beta OS=Veillonella atypica ACS-134-V-Col7a OX=866778 GN=HMPREF9684_1592 PE=3 SV=1;tr|D1BPH6|D1BPH6_VEIPT Ribonucleoside-diphosphate reductase subunit beta OS=Veillonella parvula (strain A	20	10353000	2240300	9	9	9	9	3	9	3	9	3	27.5	27.5	27.5	40.388	39.488	12	1	26
885	D1BPL7|D1BPL7	tr|D1BPL7|D1BPL7_VEIPT	tr|D1BPL7|D1BPL7_VEIPT Nitrite and sulphite reductase 4Fe-4S region OS=Veillonella parvula (strain ATCC 10790 / DSM 2008 / CCUG 5123 / JCM 12972 / NCTC 11810 / Te3) OX=479436 GN=Vpar_1648 PE=4 SV=1	29	2386700	5966900	8	8	4	3	8	3	8	0	4	17.6	17.6	9.5	58.03	9.6535	4	15	19
886	D1BNZ5|D1BNZ5	tr|D1BNZ5|D1BNZ5_VEIPT	tr|D1BNZ5|D1BNZ5_VEIPT Porphobilinogen deaminase OS=Veillonella parvula (strain ATCC 10790 / DSM 2008 / CCUG 5123 / JCM 12972 / NCTC 11810 / Te3) OX=479436 GN=hemC PE=3 SV=1	22	18747000	7224400	6	6	6	1	6	1	6	1	6	14.7	14.7	14.7	34.04	4.276	15	13	35
887	E1LAP6|E1LAP6	tr|E1LAP6|E1LAP6_9FIRM	tr|E1LAP6|E1LAP6_9FIRM Methylenetetrahydrofolate--tRNA-(uracil-5-)-methyltransferase TrmFO OS=Veillonella atypica ACS-134-V-Col7a OX=866778 GN=trmFO PE=3 SV=1	22	24515000	1503300	10	10	4	9	4	9	4	4	0	26.5	26.5	13.2	48.861	85.731	41	5	52
888	D1BNC7|D1BNC7	tr|D1BNC7|D1BNC7_VEIPT	tr|D1BNC7|D1BNC7_VEIPT XRE family transcriptional regulator OS=Veillonella parvula (strain ATCC 10790 / DSM 2008 / CCUG 5123 / JCM 12972 / NCTC 11810 / Te3) OX=479436 GN=Vpar_1204 PE=4 SV=1	9	12553000	15621000	7	4	4	3	6	0	3	0	3	46.7	36.7	36.7	17.74	20.087	2	11	29
889	D1BQE3|D1BQE3	tr|D1BQE3|D1BQE3_VEIPT	tr|D1BQE3|D1BQE3_VEIPT Periplasmic binding protein OS=Veillonella parvula (strain ATCC 10790 / DSM 2008 / CCUG 5123 / JCM 12972 / NCTC 11810 / Te3) OX=479436 GN=Vpar_0067 PE=4 SV=1	12	2370400	9835700	3	3	3	2	3	2	3	2	3	10.1	10.1	10.1	35.498	8.4429	0	3	3
890	E1L989|E1L989	tr|E1L989|E1L989_9FIRM	tr|E1L989|E1L989_9FIRM Endonuclease MutS2 OS=Veillonella atypica ACS-134-V-Col7a OX=866778 GN=mutS2 PE=3 SV=1	44	2254500	4004900	14	3	3	4	8	2	0	2	0	15.8	2.8	2.8	89.044	12.476	3	10	34
891	D1BM25|D1BM25;E1LCK7|E1LCK7	tr|D1BM25|D1BM25_VEIPT	tr|D1BM25|D1BM25_VEIPT M18 family aminopeptidase OS=Veillonella parvula (strain ATCC 10790 / DSM 2008 / CCUG 5123 / JCM 12972 / NCTC 11810 / Te3) OX=479436 GN=Vpar_0751 PE=3 SV=1	26	179080	1980600	3	3	3	1	3	1	3	1	3	8	8	8	49.459	4.8873	0	4	5
892	D1BLL1|D1BLL1;E1LE43|E1LE43	tr|D1BLL1|D1BLL1_VEIPT;tr|E1LE43|E1LE43_9FIRM	tr|D1BLL1|D1BLL1_VEIPT Uncharacterized protein OS=Veillonella parvula (strain ATCC 10790 / DSM 2008 / CCUG 5123 / JCM 12972 / NCTC 11810 / Te3) OX=479436 GN=Vpar_0585 PE=4 SV=1;tr|E1LE43|E1LE43_9FIRM Uncharacterized protein OS=Veillonella atypica ACS-134-V	21	13028000	6056400	9	9	9	5	6	5	6	5	6	23.9	23.9	23.9	40.656	39.817	10	9	42
893	E1LAF2|E1LAF2	tr|E1LAF2|E1LAF2_9FIRM	tr|E1LAF2|E1LAF2_9FIRM ABC transporter, ATP-binding protein OS=Veillonella atypica ACS-134-V-Col7a OX=866778 GN=HMPREF9684_1907 PE=4 SV=1	27	1681200	976460	7	2	2	4	5	2	0	2	0	14.7	4.6	4.6	59.166	1.839	4	8	13
894	D1BMU3|D1BMU3	tr|D1BMU3|D1BMU3_VEIPT	tr|D1BMU3|D1BMU3_VEIPT PilT protein domain protein OS=Veillonella parvula (strain ATCC 10790 / DSM 2008 / CCUG 5123 / JCM 12972 / NCTC 11810 / Te3) OX=479436 GN=Vpar_1019 PE=3 SV=1	15	16385000	6369400	6	6	3	3	5	3	5	0	2	15.4	15.4	8.4	42.189	15.306	30	19	81
895	D1BLN3|D1BLN3	tr|D1BLN3|D1BLN3_VEIPT	tr|D1BLN3|D1BLN3_VEIPT Bifunctional protein GlmU OS=Veillonella parvula (strain ATCC 10790 / DSM 2008 / CCUG 5123 / JCM 12972 / NCTC 11810 / Te3) OX=479436 GN=glmU PE=3 SV=1	21	244860	5494800	10	10	9	1	9	1	9	1	8	26.5	26.5	23.9	48.922	34.211	0	16	21
896	E1LAU1|E1LAU1	tr|E1LAU1|E1LAU1_9FIRM	tr|E1LAU1|E1LAU1_9FIRM Cysteine--tRNA ligase OS=Veillonella atypica ACS-134-V-Col7a OX=866778 GN=cysS PE=3 SV=1	32	2589500	5507600	6	2	2	4	4	2	0	2	0	12.7	4.1	4.1	55.071	3.4501	4	10	18
897	D1BQ78|D1BQ78	tr|D1BQ78|D1BQ78_VEIPT	tr|D1BQ78|D1BQ78_VEIPT Beta sliding clamp OS=Veillonella parvula (strain ATCC 10790 / DSM 2008 / CCUG 5123 / JCM 12972 / NCTC 11810 / Te3) OX=479436 GN=Vpar_0002 PE=3 SV=1	27	2368600	9119200	9	9	4	6	7	6	7	2	4	24.1	24.1	11.4	41.489	30.297	3	11	19
898	D1BME3|D1BME3	tr|D1BME3|D1BME3_VEIPT	tr|D1BME3|D1BME3_VEIPT tRNA-2-methylthio-N(6)-dimethylallyladenosine synthase OS=Veillonella parvula (strain ATCC 10790 / DSM 2008 / CCUG 5123 / JCM 12972 / NCTC 11810 / Te3) OX=479436 GN=miaB PE=3 SV=1	25	8065400	7653500	13	13	7	6	12	6	12	0	7	31.6	31.6	22.4	49.55	40.84	13	15	32
899	D1BP08|D1BP08	tr|D1BP08|D1BP08_VEIPT	tr|D1BP08|D1BP08_VEIPT Acetolactate synthase small subunit OS=Veillonella parvula (strain ATCC 10790 / DSM 2008 / CCUG 5123 / JCM 12972 / NCTC 11810 / Te3) OX=479436 GN=Vpar_1438 PE=3 SV=1	15	3249800	7320400	8	8	1	2	7	2	7	0	1	43.8	43.8	6.2	18.05	38.622	0	9	38
900	D1BPW8|D1BPW8	tr|D1BPW8|D1BPW8_VEIPT	tr|D1BPW8|D1BPW8_VEIPT Adenylosuccinate synthetase OS=Veillonella parvula (strain ATCC 10790 / DSM 2008 / CCUG 5123 / JCM 12972 / NCTC 11810 / Te3) OX=479436 GN=purA PE=3 SV=1	28	3409500	10242000	11	11	7	3	9	3	9	0	5	30.2	30.2	17.8	46.704	23.514	14	32	72
901	D1BQZ4|D1BQZ4	tr|D1BQZ4|D1BQZ4_VEIPT	tr|D1BQZ4|D1BQZ4_VEIPT Permease OS=Veillonella parvula (strain ATCC 10790 / DSM 2008 / CCUG 5123 / JCM 12972 / NCTC 11810 / Te3) OX=479436 GN=Vpar_0273 PE=3 SV=1	22	2948700	5979400	3	3	3	1	3	1	3	1	3	4.1	4.1	4.1	57.05	2.3963	0	1	3
902	D1BMP1|D1BMP1	tr|D1BMP1|D1BMP1_VEIPT	tr|D1BMP1|D1BMP1_VEIPT Methylenetetrahydrofolate--tRNA-(uracil-5-)-methyltransferase TrmFO OS=Veillonella parvula (strain ATCC 10790 / DSM 2008 / CCUG 5123 / JCM 12972 / NCTC 11810 / Te3) OX=479436 GN=trmFO PE=3 SV=1	22	25688000	4912400	9	3	3	6	6	1	2	1	2	22.4	9.1	9.1	48.912	9.5465	41	9	62
903	D1BQT9|D1BQT9	tr|D1BQT9|D1BQT9_VEIPT	tr|D1BQT9|D1BQT9_VEIPT AAA_27 domain-containing protein OS=Veillonella parvula (strain ATCC 10790 / DSM 2008 / CCUG 5123 / JCM 12972 / NCTC 11810 / Te3) OX=479436 GN=Vpar_0215 PE=4 SV=1	56	458910	4896000	24	24	22	3	18	3	18	1	17	26.1	26.1	24.9	111.79	44.69	4	31	70
904	D1BQU5|D1BQU5	tr|D1BQU5|D1BQU5_VEIPT	tr|D1BQU5|D1BQU5_VEIPT Transcriptional regulator, Crp/Fnr family OS=Veillonella parvula (strain ATCC 10790 / DSM 2008 / CCUG 5123 / JCM 12972 / NCTC 11810 / Te3) OX=479436 GN=Vpar_0221 PE=4 SV=1	17	19178000	4250600	4	1	1	3	3	0	1	0	1	19.7	8.3	8.3	26.052	2.4268	11	7	18
905	D1BQJ7|D1BQJ7	tr|D1BQJ7|D1BQJ7_VEIPT	tr|D1BQJ7|D1BQJ7_VEIPT Cobalt transport protein OS=Veillonella parvula (strain ATCC 10790 / DSM 2008 / CCUG 5123 / JCM 12972 / NCTC 11810 / Te3) OX=479436 GN=Vpar_0121 PE=4 SV=1	12	3633700	4784000	5	5	3	3	3	3	3	1	2	26.1	26.1	18.5	24.11	28.781	3	9	45
906	D1BNX7|D1BNX7	tr|D1BNX7|D1BNX7_VEIPT	tr|D1BNX7|D1BNX7_VEIPT DNA polymerase III subunit alpha OS=Veillonella parvula (strain ATCC 10790 / DSM 2008 / CCUG 5123 / JCM 12972 / NCTC 11810 / Te3) OX=479436 GN=Vpar_1406 PE=3 SV=1	65	1303300	3867800	16	16	7	5	11	5	11	0	6	14.4	14.4	7.2	128.01	31.107	4	23	77
907	E1LBJ0|E1LBJ0	tr|E1LBJ0|E1LBJ0_9FIRM	tr|E1LBJ0|E1LBJ0_9FIRM Acetolactate synthase small subunit OS=Veillonella atypica ACS-134-V-Col7a OX=866778 GN=ilvN PE=3 SV=1	15	3249800	6549400	8	1	1	2	6	0	0	0	0	43.8	6.2	6.2	18.064	2.0861	0	6	40
908	E1L9P6|E1L9P6	tr|E1L9P6|E1L9P6_9FIRM	tr|E1L9P6|E1L9P6_9FIRM R3H domain protein OS=Veillonella atypica ACS-134-V-Col7a OX=866778 GN=HMPREF9684_1509 PE=4 SV=1	19	28217000	5765200	9	6	6	8	3	6	0	6	0	34.5	23.8	23.8	29.056	59.221	26	14	45
909	E1L9J2|E1L9J2;D1BL98|D1BL98	tr|E1L9J2|E1L9J2_9FIRM;tr|D1BL98|D1BL98_VEIPT	tr|E1L9J2|E1L9J2_9FIRM Serine/threonine transporter SstT OS=Veillonella atypica ACS-134-V-Col7a OX=866778 GN=sstT PE=3 SV=1;tr|D1BL98|D1BL98_VEIPT Serine/threonine transporter SstT OS=Veillonella parvula (strain ATCC 10790 / DSM 2008 / CCUG 5123 / JCM 1297	9	93778000	16091000	3	3	3	2	3	2	3	2	3	7.4	7.4	7.4	42.949	11.93	16	4	22
910	D1BNP7|D1BNP7	tr|D1BNP7|D1BNP7_VEIPT	tr|D1BNP7|D1BNP7_VEIPT UDP-N-acetylenolpyruvoylglucosamine reductase OS=Veillonella parvula (strain ATCC 10790 / DSM 2008 / CCUG 5123 / JCM 12972 / NCTC 11810 / Te3) OX=479436 GN=murB PE=3 SV=1	17	2758400	8117800	8	3	3	4	7	0	3	0	3	28.2	10.7	10.7	33.745	3.2866	6	17	31
911	D1BLG9|D1BLG9	tr|D1BLG9|D1BLG9_VEIPT	tr|D1BLG9|D1BLG9_VEIPT 2-dehydro-3-deoxyphosphooctonate aldolase OS=Veillonella parvula (strain ATCC 10790 / DSM 2008 / CCUG 5123 / JCM 12972 / NCTC 11810 / Te3) OX=479436 GN=kdsA PE=3 SV=1	16	2345100	20456000	11	11	3	4	7	4	7	0	2	37.9	37.9	9.2	29.846	46.032	4	17	42
912	E1L9X3|E1L9X3	tr|E1L9X3|E1L9X3_9FIRM	tr|E1L9X3|E1L9X3_9FIRM Putative CoA-substrate-specific enzyme activase OS=Veillonella atypica ACS-134-V-Col7a OX=866778 GN=HMPREF9684_1580 PE=3 SV=1	83	227590000	1609100	54	54	32	52	16	52	16	31	7	40.2	40.2	23.8	156.9	323.31	937	23	979
913	E1LAU5|E1LAU5	tr|E1LAU5|E1LAU5_9FIRM	tr|E1LAU5|E1LAU5_9FIRM PIN domain protein OS=Veillonella atypica ACS-134-V-Col7a OX=866778 GN=HMPREF9684_0283 PE=3 SV=1	16	18322000	6531000	4	1	1	4	4	1	1	1	1	9.9	2.9	2.9	42.164	9.3176	32	19	82
914	D1BLG1|D1BLG1	tr|D1BLG1|D1BLG1_VEIPT	tr|D1BLG1|D1BLG1_VEIPT Acyl-[acyl-carrier-protein]--UDP-N-acetylglucosamine O-acyltransferase OS=Veillonella parvula (strain ATCC 10790 / DSM 2008 / CCUG 5123 / JCM 12972 / NCTC 11810 / Te3) OX=479436 GN=lpxA PE=3 SV=1	12	31855000	13185000	8	4	4	4	7	0	3	0	3	31.9	15.6	15.6	29.035	7.7436	29	9	63
915	D1BLJ2|D1BLJ2	tr|D1BLJ2|D1BLJ2_VEIPT	tr|D1BLJ2|D1BLJ2_VEIPT Carbamoyl-phosphate synthase large chain OS=Veillonella parvula (strain ATCC 10790 / DSM 2008 / CCUG 5123 / JCM 12972 / NCTC 11810 / Te3) OX=479436 GN=carB PE=3 SV=1	70	1663700	4226400	14	14	2	9	11	9	11	0	2	12.9	12.9	2.2	117.6	30.839	10	19	30
916	D1BMU6|D1BMU6	tr|D1BMU6|D1BMU6_VEIPT	tr|D1BMU6|D1BMU6_VEIPT ATP:guanido phosphotransferase OS=Veillonella parvula (strain ATCC 10790 / DSM 2008 / CCUG 5123 / JCM 12972 / NCTC 11810 / Te3) OX=479436 GN=Vpar_1022 PE=3 SV=1	25	1793900	5603000	8	7	7	2	8	1	7	1	7	25.5	22.7	22.7	40.023	13.04	3	12	18
917	E1LD32|E1LD32	tr|E1LD32|E1LD32_9FIRM	tr|E1LD32|E1LD32_9FIRM Adenylosuccinate lyase OS=Veillonella atypica ACS-134-V-Col7a OX=866778 GN=purB PE=3 SV=1	31	35946000	6568100	13	13	3	13	7	13	7	3	1	27.6	27.6	4.6	49.11	29.59	28	7	37
918	D1BP41|D1BP41	tr|D1BP41|D1BP41_VEIPT	tr|D1BP41|D1BP41_VEIPT Methionine aminopeptidase OS=Veillonella parvula (strain ATCC 10790 / DSM 2008 / CCUG 5123 / JCM 12972 / NCTC 11810 / Te3) OX=479436 GN=map PE=3 SV=1	15	3731900	3334300	7	7	3	4	4	4	4	0	3	26.2	26.2	13.3	27.901	5.9247	5	11	21
919	E1LCI0|E1LCI0	tr|E1LCI0|E1LCI0_9FIRM	tr|E1LCI0|E1LCI0_9FIRM Polyphosphate kinase OS=Veillonella atypica ACS-134-V-Col7a OX=866778 GN=ppk PE=3 SV=1	47	3265000	1628000	9	9	5	6	3	6	3	3	1	14.2	14.2	9.4	81.076	16.252	8	2	10
920	E1LCQ9|E1LCQ9;D1BLQ2|D1BLQ2	tr|E1LCQ9|E1LCQ9_9FIRM;tr|D1BLQ2|D1BLQ2_VEIPT	tr|E1LCQ9|E1LCQ9_9FIRM Ribosomal RNA small subunit methyltransferase A OS=Veillonella atypica ACS-134-V-Col7a OX=866778 GN=rsmA PE=3 SV=1;tr|D1BLQ2|D1BLQ2_VEIPT Ribosomal RNA small subunit methyltransferase A OS=Veillonella parvula (strain ATCC 10790 / DSM	17	9432700	2777300	7	7	7	5	4	5	4	5	4	21.8	21.8	21.8	31.365	7.9136	9	5	19
921	D1BLE0|D1BLE0	tr|D1BLE0|D1BLE0_VEIPT	tr|D1BLE0|D1BLE0_VEIPT Serine--tRNA ligase OS=Veillonella parvula (strain ATCC 10790 / DSM 2008 / CCUG 5123 / JCM 12972 / NCTC 11810 / Te3) OX=479436 GN=serS PE=3 SV=1	23	992500	9922600	9	9	6	3	9	3	9	0	6	21.8	21.8	15.5	48.208	98.646	4	24	61
922	D1BMM1|D1BMM1	tr|D1BMM1|D1BMM1_VEIPT	tr|D1BMM1|D1BMM1_VEIPT Adenosylhomocysteinase OS=Veillonella parvula (strain ATCC 10790 / DSM 2008 / CCUG 5123 / JCM 12972 / NCTC 11810 / Te3) OX=479436 GN=ahcY PE=3 SV=1	24	724510	3454800	7	7	5	3	6	3	6	2	4	16.4	16.4	12.8	45.711	4.7217	1	10	12
923	E1LB78|E1LB78;D1BL28|D1BL28	tr|E1LB78|E1LB78_9FIRM;tr|D1BL28|D1BL28_VEIPT	tr|E1LB78|E1LB78_9FIRM Uncharacterized protein OS=Veillonella atypica ACS-134-V-Col7a OX=866778 GN=HMPREF9684_1450 PE=4 SV=1;tr|D1BL28|D1BL28_VEIPT Uncharacterized protein OS=Veillonella parvula (strain ATCC 10790 / DSM 2008 / CCUG 5123 / JCM 12972 / NCTC	7	97516000	19818000	4	4	4	2	4	2	4	2	4	18.3	18.3	18.3	20.946	14.14	45	19	88
924	D1BQH6|D1BQH6	tr|D1BQH6|D1BQH6_VEIPT	tr|D1BQH6|D1BQH6_VEIPT S-layer domain protein OS=Veillonella parvula (strain ATCC 10790 / DSM 2008 / CCUG 5123 / JCM 12972 / NCTC 11810 / Te3) OX=479436 GN=Vpar_0100 PE=3 SV=1	21	4487400	14519000	18	18	13	9	12	9	12	5	8	41	41	31.6	60.709	323.31	10	11	1192
925	E1LAH0|E1LAH0	tr|E1LAH0|E1LAH0_9FIRM	tr|E1LAH0|E1LAH0_9FIRM Lysine--tRNA ligase OS=Veillonella atypica ACS-134-V-Col7a OX=866778 GN=lysS PE=3 SV=1	32	28344000	5144900	16	4	4	13	7	4	0	4	0	33	9.3	9.3	57.757	27.444	30	11	55
926	E1LA37|E1LA37	tr|E1LA37|E1LA37_9FIRM	tr|E1LA37|E1LA37_9FIRM Nitrite/sulfite reductase ferredoxin domain protein OS=Veillonella atypica ACS-134-V-Col7a OX=866778 GN=HMPREF9684_1855 PE=4 SV=1	30	2991600	4559100	8	4	4	7	4	4	0	4	0	14.7	6.6	6.6	58.025	2.7319	10	10	20
927	D1BPF3|D1BPF3	tr|D1BPF3|D1BPF3_VEIPT	tr|D1BPF3|D1BPF3_VEIPT CTP synthase OS=Veillonella parvula (strain ATCC 10790 / DSM 2008 / CCUG 5123 / JCM 12972 / NCTC 11810 / Te3) OX=479436 GN=pyrG PE=3 SV=1	32	1371700	2163600	10	10	5	4	5	4	5	1	4	18.5	18.5	10.1	59.685	15.131	3	8	16
928	D1BMW9|D1BMW9	tr|D1BMW9|D1BMW9_VEIPT	tr|D1BMW9|D1BMW9_VEIPT Beta-lactamase domain protein OS=Veillonella parvula (strain ATCC 10790 / DSM 2008 / CCUG 5123 / JCM 12972 / NCTC 11810 / Te3) OX=479436 GN=Vpar_1045 PE=4 SV=1	19	5821100	4880800	3	3	1	1	3	1	3	0	1	9.2	9.2	3.2	35.24	3.971	2	7	13
929	D1BPS6|D1BPS6	tr|D1BPS6|D1BPS6_VEIPT	tr|D1BPS6|D1BPS6_VEIPT Histidine kinase OS=Veillonella parvula (strain ATCC 10790 / DSM 2008 / CCUG 5123 / JCM 12972 / NCTC 11810 / Te3) OX=479436 GN=Vpar_1707 PE=4 SV=1	28	439060	5613300	10	10	8	1	8	1	8	0	7	19.1	19.1	15.1	53.23	7.0073	2	10	17
930	E1LED5|E1LED5	tr|E1LED5|E1LED5_9FIRM	tr|E1LED5|E1LED5_9FIRM UDP-N-acetylenolpyruvoylglucosamine reductase OS=Veillonella atypica ACS-134-V-Col7a OX=866778 GN=murB PE=3 SV=1	19	5729900	2583900	9	9	4	7	4	7	4	3	0	30.3	30.3	12.9	33.88	19.619	11	13	29
931	E1L9N1|E1L9N1	tr|E1L9N1|E1L9N1_9FIRM	tr|E1L9N1|E1L9N1_9FIRM tRNA-2-methylthio-N(6)-dimethylallyladenosine synthase OS=Veillonella atypica ACS-134-V-Col7a OX=866778 GN=miaB PE=3 SV=1	27	11754000	4340900	12	6	6	11	6	5	1	5	1	27.9	18.7	18.7	49.797	13.936	27	10	37
932	D1BPB5|D1BPB5	tr|D1BPB5|D1BPB5_VEIPT	tr|D1BPB5|D1BPB5_VEIPT DUF2179 domain-containing protein OS=Veillonella parvula (strain ATCC 10790 / DSM 2008 / CCUG 5123 / JCM 12972 / NCTC 11810 / Te3) OX=479436 GN=Vpar_1546 PE=4 SV=1	10	5236700	12175000	4	1	1	3	3	0	1	0	1	15.3	3.5	3.5	34.136	5.3867	30	12	71
933	E1LAJ9|E1LAJ9	tr|E1LAJ9|E1LAJ9_9FIRM	tr|E1LAJ9|E1LAJ9_9FIRM LexA repressor OS=Veillonella atypica ACS-134-V-Col7a OX=866778 GN=lexA PE=3 SV=1	11	43472000	6691000	8	8	5	6	3	6	3	4	1	35.6	35.6	28	25.277	74.571	68	4	73
934	E1LE92|E1LE92	tr|E1LE92|E1LE92_9FIRM	tr|E1LE92|E1LE92_9FIRM Acyl-[acyl-carrier-protein]--UDP-N-acetylglucosamine O-acyltransferase OS=Veillonella atypica ACS-134-V-Col7a OX=866778 GN=lpxA PE=3 SV=1	12	56039000	9594100	9	9	5	9	6	9	6	5	2	31.9	31.9	15.6	29.012	14.523	36	8	57
935	D1BME1|D1BME1	tr|D1BME1|D1BME1_VEIPT	tr|D1BME1|D1BME1_VEIPT PHP domain protein OS=Veillonella parvula (strain ATCC 10790 / DSM 2008 / CCUG 5123 / JCM 12972 / NCTC 11810 / Te3) OX=479436 GN=Vpar_0867 PE=4 SV=1	19	1207700	3374000	7	7	7	1	3	1	3	1	3	25.1	25.1	25.1	31.495	8.4034	0	3	24
936	E1L9N2|E1L9N2	tr|E1L9N2|E1L9N2_9FIRM	tr|E1L9N2|E1L9N2_9FIRM DNA mismatch repair protein MutS OS=Veillonella atypica ACS-134-V-Col7a OX=866778 GN=mutS PE=3 SV=1	49	14639000	848510	15	7	7	14	4	7	0	7	0	14.7	6.6	6.6	98.448	5.0252	26	2	37
937	D1BQ71|D1BQ71;E1L9P7|E1L9P7	tr|D1BQ71|D1BQ71_VEIPT;tr|E1L9P7|E1L9P7_9FIRM	tr|D1BQ71|D1BQ71_VEIPT tRNA modification GTPase MnmE OS=Veillonella parvula (strain ATCC 10790 / DSM 2008 / CCUG 5123 / JCM 12972 / NCTC 11810 / Te3) OX=479436 GN=mnmE PE=3 SV=1;tr|E1L9P7|E1L9P7_9FIRM tRNA modification GTPase MnmE OS=Veillonella atypica AC	29	2279600	6064100	7	7	7	4	6	4	6	4	6	17.1	17.1	17.1	50.318	12.388	4	10	15
938	D1BMP7|D1BMP7;E1LAQ2|E1LAQ2	tr|D1BMP7|D1BMP7_VEIPT;tr|E1LAQ2|E1LAQ2_9FIRM	tr|D1BMP7|D1BMP7_VEIPT Ribosome biogenesis GTPase A OS=Veillonella parvula (strain ATCC 10790 / DSM 2008 / CCUG 5123 / JCM 12972 / NCTC 11810 / Te3) OX=479436 GN=Vpar_0973 PE=3 SV=1;tr|E1LAQ2|E1LAQ2_9FIRM Ribosome biogenesis GTPase A OS=Veillonella atypica	19	6470400	3147000	7	7	7	3	4	3	4	3	4	22.6	22.6	22.6	33.497	5.2408	2	2	12
939	E1LAM8|E1LAM8	tr|E1LAM8|E1LAM8_9FIRM	tr|E1LAM8|E1LAM8_9FIRM Adenosylhomocysteinase OS=Veillonella atypica ACS-134-V-Col7a OX=866778 GN=ahcY PE=3 SV=1	23	759440	1103700	3	1	1	2	3	1	1	1	1	7	3.4	3.4	45.677	6.7896	2	3	5
940	D1BN22|D1BN22;E1L9C3|E1L9C3	tr|D1BN22|D1BN22_VEIPT;tr|E1L9C3|E1L9C3_9FIRM	tr|D1BN22|D1BN22_VEIPT Peptide chain release factor 1 OS=Veillonella parvula (strain ATCC 10790 / DSM 2008 / CCUG 5123 / JCM 12972 / NCTC 11810 / Te3) OX=479436 GN=prfA PE=3 SV=1;tr|E1L9C3|E1L9C3_9FIRM Peptide chain release factor 1 OS=Veillonella atypica	28	8329200	1011600	5	5	5	1	5	1	5	1	5	13.6	13.6	13.6	40.812	8.2838	0	4	9
941	D1BLR9|D1BLR9	tr|D1BLR9|D1BLR9_VEIPT	tr|D1BLR9|D1BLR9_VEIPT Hydrogenase formation HypD protein OS=Veillonella parvula (strain ATCC 10790 / DSM 2008 / CCUG 5123 / JCM 12972 / NCTC 11810 / Te3) OX=479436 GN=Vpar_0643 PE=3 SV=1	25	2448700	2427300	5	4	4	2	3	1	2	1	2	14	12.1	12.1	40.349	83.098	1	2	7
942	D1BLJ4|D1BLJ4;E1LE60|E1LE60	tr|D1BLJ4|D1BLJ4_VEIPT;tr|E1LE60|E1LE60_9FIRM	tr|D1BLJ4|D1BLJ4_VEIPT Dihydroorotate dehydrogenase OS=Veillonella parvula (strain ATCC 10790 / DSM 2008 / CCUG 5123 / JCM 12972 / NCTC 11810 / Te3) OX=479436 GN=pyrD PE=3 SV=1;tr|E1LE60|E1LE60_9FIRM Dihydroorotate dehydrogenase OS=Veillonella atypica ACS-	11	61818000	9456000	6	6	6	5	3	5	3	5	3	17.7	17.7	17.7	33.32	34.534	24	2	29
943	E1LE98|E1LE98	tr|E1LE98|E1LE98_9FIRM	tr|E1LE98|E1LE98_9FIRM Uncharacterized protein OS=Veillonella atypica ACS-134-V-Col7a OX=866778 GN=HMPREF9684_1164 PE=4 SV=1	23	143220000	7503500	12	12	11	12	2	12	2	11	1	39.1	39.1	36.3	36.333	68.037	47	3	52
944	D1BQL1|D1BQL1	tr|D1BQL1|D1BQL1_VEIPT	tr|D1BQL1|D1BQL1_VEIPT Uncharacterized protein OS=Veillonella parvula (strain ATCC 10790 / DSM 2008 / CCUG 5123 / JCM 12972 / NCTC 11810 / Te3) OX=479436 GN=Vpar_0135 PE=4 SV=1	30	2700300	5207700	6	6	6	1	6	1	6	1	6	11.1	11.1	11.1	60.421	3.7852	0	8	10
945	D1BMT3|D1BMT3	tr|D1BMT3|D1BMT3_VEIPT	tr|D1BMT3|D1BMT3_VEIPT Ribonuclease R OS=Veillonella parvula (strain ATCC 10790 / DSM 2008 / CCUG 5123 / JCM 12972 / NCTC 11810 / Te3) OX=479436 GN=rnr PE=3 SV=1	45	3659100	1948700	15	15	11	6	4	6	4	3	4	19	19	14	87.124	29.113	4	2	55
946	E1LDV4|E1LDV4	tr|E1LDV4|E1LDV4_9FIRM	tr|E1LDV4|E1LDV4_9FIRM Tryptophan synthase beta chain OS=Veillonella atypica ACS-134-V-Col7a OX=866778 GN=trpB PE=3 SV=1	21	26642000	2950400	12	12	2	10	4	10	4	2	0	30.5	30.5	3.8	43.427	81.584	44	2	55
947	D1BQN7|D1BQN7	tr|D1BQN7|D1BQN7_VEIPT	tr|D1BQN7|D1BQN7_VEIPT Tryptophan synthase beta chain OS=Veillonella parvula (strain ATCC 10790 / DSM 2008 / CCUG 5123 / JCM 12972 / NCTC 11810 / Te3) OX=479436 GN=trpB PE=3 SV=1	23	24325000	3815500	11	1	1	8	5	0	1	0	1	30	3.3	3.3	43.531	24.694	42	5	63
948	E1LCH3|E1LCH3	tr|E1LCH3|E1LCH3_9FIRM	tr|E1LCH3|E1LCH3_9FIRM PSP1 C-terminal domain protein OS=Veillonella atypica ACS-134-V-Col7a OX=866778 GN=HMPREF9684_1660 PE=4 SV=1	19	75242000	4859800	13	13	6	12	5	12	5	6	1	37.4	37.4	14.9	31.538	18.338	18	8	31
949	D1BLT4|D1BLT4	tr|D1BLT4|D1BLT4_VEIPT	tr|D1BLT4|D1BLT4_VEIPT Glucose-6-phosphate isomerase OS=Veillonella parvula (strain ATCC 10790 / DSM 2008 / CCUG 5123 / JCM 12972 / NCTC 11810 / Te3) OX=479436 GN=Vpar_0658 PE=3 SV=1	22	1954500	6176500	6	6	2	3	6	3	6	0	2	9.6	9.6	3.8	53.876	3.3898	2	8	13
950	D1BMZ7|D1BMZ7	tr|D1BMZ7|D1BMZ7_VEIPT	tr|D1BMZ7|D1BMZ7_VEIPT ATP-dependent 6-phosphofructokinase OS=Veillonella parvula (strain ATCC 10790 / DSM 2008 / CCUG 5123 / JCM 12972 / NCTC 11810 / Te3) OX=479436 GN=pfkA PE=3 SV=1	21	459540	6135700	7	7	7	1	5	1	5	1	5	23.2	23.2	23.2	34.734	10.054	0	7	13
951	D1BN70|D1BN70	tr|D1BN70|D1BN70_VEIPT	tr|D1BN70|D1BN70_VEIPT Cobalt-precorrin-5B C(1)-methyltransferase OS=Veillonella parvula (strain ATCC 10790 / DSM 2008 / CCUG 5123 / JCM 12972 / NCTC 11810 / Te3) OX=479436 GN=cbiD PE=3 SV=1	21	3628500	5751300	9	9	3	4	9	4	9	0	3	28	28	8.9	39.985	20.526	4	30	38
952	D1BME5|D1BME5	tr|D1BME5|D1BME5_VEIPT	tr|D1BME5|D1BME5_VEIPT DNA mismatch repair protein MutS OS=Veillonella parvula (strain ATCC 10790 / DSM 2008 / CCUG 5123 / JCM 12972 / NCTC 11810 / Te3) OX=479436 GN=mutS PE=3 SV=1	53	7106400	784470	16	16	8	9	6	9	6	2	2	16.1	16.1	8.1	98.887	17.896	13	4	37
953	E1LAQ1|E1LAQ1;D1BMP6|D1BMP6	tr|E1LAQ1|E1LAQ1_9FIRM;tr|D1BMP6|D1BMP6_VEIPT	tr|E1LAQ1|E1LAQ1_9FIRM Ribonuclease HII OS=Veillonella atypica ACS-134-V-Col7a OX=866778 GN=rnhB PE=3 SV=1;tr|D1BMP6|D1BMP6_VEIPT Ribonuclease HII OS=Veillonella parvula (strain ATCC 10790 / DSM 2008 / CCUG 5123 / JCM 12972 / NCTC 11810 / Te3) OX=479436 GN	15	6729400	3126400	3	3	3	2	3	2	3	2	3	12.4	12.4	12.4	29.821	2.5969	5	5	10
954	D1BPG8|D1BPG8	tr|D1BPG8|D1BPG8_VEIPT	tr|D1BPG8|D1BPG8_VEIPT CoA-substrate-specific enzyme activase OS=Veillonella parvula (strain ATCC 10790 / DSM 2008 / CCUG 5123 / JCM 12972 / NCTC 11810 / Te3) OX=479436 GN=Vpar_1599 PE=3 SV=1	83	95738000	2625800	36	14	14	23	19	2	10	2	10	28.8	12.4	12.4	157.09	36.558	442	21	507
955	D1BNZ6|D1BNZ6	tr|D1BNZ6|D1BNZ6_VEIPT	tr|D1BNZ6|D1BNZ6_VEIPT Glutamyl-tRNA reductase OS=Veillonella parvula (strain ATCC 10790 / DSM 2008 / CCUG 5123 / JCM 12972 / NCTC 11810 / Te3) OX=479436 GN=hemA PE=3 SV=1	26	3712500	2680000	7	7	4	2	6	2	6	0	3	13.2	13.2	7.8	47.6	6.412	3	7	13
956	E1LDP2|E1LDP2	tr|E1LDP2|E1LDP2_9FIRM	tr|E1LDP2|E1LDP2_9FIRM Cyclic nucleotide-binding domain protein OS=Veillonella atypica ACS-134-V-Col7a OX=866778 GN=HMPREF9684_1297 PE=4 SV=1	16	55597000	3689000	6	6	3	6	2	6	2	3	0	27.5	27.5	16.3	26.562	41.557	35	5	40
957	D1BN67|D1BN67;E1L977|E1L977	tr|D1BN67|D1BN67_VEIPT;tr|E1L977|E1L977_9FIRM	tr|D1BN67|D1BN67_VEIPT Precorrin-4 C11-methyltransferase OS=Veillonella parvula (strain ATCC 10790 / DSM 2008 / CCUG 5123 / JCM 12972 / NCTC 11810 / Te3) OX=479436 GN=Vpar_1143 PE=3 SV=1;tr|E1L977|E1L977_9FIRM Precorrin-4 C(11)-methyltransferase OS=Veillon	13	1439300	5271200	3	3	3	1	3	1	3	1	3	11.9	11.9	11.9	27.456	3.9014	1	7	14
958	E1LAD8|E1LAD8;D1BMK0|D1BMK0	tr|E1LAD8|E1LAD8_9FIRM;tr|D1BMK0|D1BMK0_VEIPT	tr|E1LAD8|E1LAD8_9FIRM Arginine repressor OS=Veillonella atypica ACS-134-V-Col7a OX=866778 GN=argR PE=3 SV=1;tr|D1BMK0|D1BMK0_VEIPT Arginine repressor OS=Veillonella parvula (strain ATCC 10790 / DSM 2008 / CCUG 5123 / JCM 12972 / NCTC 11810 / Te3) OX=47943	10	3287100	5071700	3	3	3	2	3	2	3	2	3	19.9	19.9	19.9	16.939	3.6856	1	8	11
959	D1BMQ8|D1BMQ8;E1LAR0|E1LAR0	tr|D1BMQ8|D1BMQ8_VEIPT;tr|E1LAR0|E1LAR0_9FIRM	tr|D1BMQ8|D1BMQ8_VEIPT Lar_N domain-containing protein OS=Veillonella parvula (strain ATCC 10790 / DSM 2008 / CCUG 5123 / JCM 12972 / NCTC 11810 / Te3) OX=479436 GN=Vpar_0984 PE=4 SV=1;tr|E1LAR0|E1LAR0_9FIRM Lar_N domain-containing protein OS=Veillonella a	23	150120	820940	5	5	5	1	5	1	5	1	5	10.6	10.6	10.6	46.27	4.8654	0	7	9
960	D1BMR3|D1BMR3	tr|D1BMR3|D1BMR3_VEIPT	tr|D1BMR3|D1BMR3_VEIPT Transporter-associated region OS=Veillonella parvula (strain ATCC 10790 / DSM 2008 / CCUG 5123 / JCM 12972 / NCTC 11810 / Te3) OX=479436 GN=Vpar_0989 PE=3 SV=1	17	6295500	3154000	4	2	2	2	4	0	2	0	2	8.1	3.8	3.8	50.73	2.0689	16	11	28
961	D1BMT4|D1BMT4	tr|D1BMT4|D1BMT4_VEIPT	tr|D1BMT4|D1BMT4_VEIPT Protein-export membrane protein SecG OS=Veillonella parvula (strain ATCC 10790 / DSM 2008 / CCUG 5123 / JCM 12972 / NCTC 11810 / Te3) OX=479436 GN=Vpar_1010 PE=3 SV=1	4	325220	60439000	2	2	2	1	2	1	2	1	2	33.3	33.3	33.3	8.356	85.118	0	68	205
962	E1LAA5|E1LAA5	tr|E1LAA5|E1LAA5_9FIRM	tr|E1LAA5|E1LAA5_9FIRM ABC transporter, ATP-binding protein OS=Veillonella atypica ACS-134-V-Col7a OX=866778 GN=HMPREF9684_1015 PE=4 SV=1	29	3137100	477500	6	5	5	5	2	4	1	4	1	12.1	10.9	10.9	63.684	11.05	16	1	20
963	E1LB89|E1LB89	tr|E1LB89|E1LB89_9FIRM	tr|E1LB89|E1LB89_9FIRM Uncharacterized protein OS=Veillonella atypica ACS-134-V-Col7a OX=866778 GN=HMPREF9684_1461 PE=4 SV=1	14	38944000	4374800	4	4	4	4	2	4	2	4	2	13.5	13.5	13.5	29.504	6.4084	13	3	16
964	D1BP09|D1BP09;E1LBJ1|E1LBJ1	tr|D1BP09|D1BP09_VEIPT;tr|E1LBJ1|E1LBJ1_9FIRM	tr|D1BP09|D1BP09_VEIPT Acetolactate synthase OS=Veillonella parvula (strain ATCC 10790 / DSM 2008 / CCUG 5123 / JCM 12972 / NCTC 11810 / Te3) OX=479436 GN=Vpar_1439 PE=3 SV=1;tr|E1LBJ1|E1LBJ1_9FIRM Acetolactate synthase OS=Veillonella atypica ACS-134-V-Col	32	187730	662090	12	12	12	1	3	1	3	1	3	22.8	22.8	22.8	62.184	19.468	3	3	36
965	E1LBJ6|E1LBJ6	tr|E1LBJ6|E1LBJ6_9FIRM	tr|E1LBJ6|E1LBJ6_9FIRM Heavy metal-associated domain protein OS=Veillonella atypica ACS-134-V-Col7a OX=866778 GN=HMPREF9684_0607 PE=4 SV=1	7	44598000	7028500	4	2	2	4	2	2	0	2	0	47.1	21.6	21.6	10.822	4.1454	7	9	20
966	D1BP10|D1BP10;E1LBJ2|E1LBJ2	tr|D1BP10|D1BP10_VEIPT;tr|E1LBJ2|E1LBJ2_9FIRM	tr|D1BP10|D1BP10_VEIPT Threonine ammonia-lyase OS=Veillonella parvula (strain ATCC 10790 / DSM 2008 / CCUG 5123 / JCM 12972 / NCTC 11810 / Te3) OX=479436 GN=Vpar_1440 PE=3 SV=1;tr|E1LBJ2|E1LBJ2_9FIRM Threonine ammonia-lyase OS=Veillonella atypica ACS-134-V	22	5028800	2066000	5	5	5	3	3	3	3	3	3	15.7	15.7	15.7	44.518	6.1449	3	3	15
967	E1L9P2|E1L9P2	tr|E1L9P2|E1L9P2_9FIRM	tr|E1L9P2|E1L9P2_9FIRM Chromosomal replication initiator protein DnaA OS=Veillonella atypica ACS-134-V-Col7a OX=866778 GN=dnaA PE=3 SV=1	28	152520000	1923400	21	21	18	20	2	20	2	18	0	45.5	45.5	41	61.301	251.47	161	5	170
968	E1LAS7|E1LAS7	tr|E1LAS7|E1LAS7_9FIRM	tr|E1LAS7|E1LAS7_9FIRM Inorganic diphosphatase OS=Veillonella atypica ACS-134-V-Col7a OX=866778 GN=HMPREF9684_0263 PE=4 SV=1	14	3777300	1156600	6	2	2	2	3	2	0	2	0	18.5	8	8	34.044	11.681	2	3	8
969	E1LAH4|E1LAH4	tr|E1LAH4|E1LAH4_9FIRM	tr|E1LAH4|E1LAH4_9FIRM Serine--tRNA ligase OS=Veillonella atypica ACS-134-V-Col7a OX=866778 GN=serS PE=3 SV=1	25	1705100	1502400	4	1	1	4	3	1	0	1	0	8.7	2.3	2.3	48.469	1.9206	7	13	41
970	E1LAK7|E1LAK7	tr|E1LAK7|E1LAK7_9FIRM	tr|E1LAK7|E1LAK7_9FIRM L-serine dehydratase OS=Veillonella atypica ACS-134-V-Col7a OX=866778 GN=sdaAA PE=3 SV=1	12	22575000	4502400	6	5	5	5	3	4	2	4	2	24.8	22.4	22.4	30.628	9.4369	7	3	10
971	E1LAI2|E1LAI2	tr|E1LAI2|E1LAI2_9FIRM	tr|E1LAI2|E1LAI2_9FIRM Bacterial cytochrome ubiquinol oxidase OS=Veillonella atypica ACS-134-V-Col7a OX=866778 GN=HMPREF9684_1893 PE=3 SV=1	11	37020000	1429700	5	4	4	5	2	4	1	4	1	12.8	10.6	10.6	51.079	109.39	55	1	57
972	E1LA94|E1LA94	tr|E1LA94|E1LA94_9FIRM	tr|E1LA94|E1LA94_9FIRM Hep/Hag repeat protein OS=Veillonella atypica ACS-134-V-Col7a OX=866778 GN=HMPREF9684_0856 PE=3 SV=1	291	507380000	1193000	119	119	111	118	14	118	14	110	12	31.5	31.5	30.2	466.26	323.31	1662	3	1668
973	D1BNU1|D1BNU1;E1LBG3|E1LBG3	tr|D1BNU1|D1BNU1_VEIPT	tr|D1BNU1|D1BNU1_VEIPT Uncharacterized protein OS=Veillonella parvula (strain ATCC 10790 / DSM 2008 / CCUG 5123 / JCM 12972 / NCTC 11810 / Te3) OX=479436 GN=Vpar_1370 PE=4 SV=1	15	1002300	2588100	5	5	5	2	4	2	4	2	4	22.5	22.5	22.5	24.161	4.7539	1	7	18
974	E1LE11|E1LE11;D1BP55|D1BP55	tr|E1LE11|E1LE11_9FIRM;tr|D1BP55|D1BP55_VEIPT	tr|E1LE11|E1LE11_9FIRM 50S ribosomal protein L29 OS=Veillonella atypica ACS-134-V-Col7a OX=866778 GN=rpmC PE=3 SV=1;tr|D1BP55|D1BP55_VEIPT 50S ribosomal protein L29 OS=Veillonella parvula (strain ATCC 10790 / DSM 2008 / CCUG 5123 / JCM 12972 / NCTC 11810 /	3	373670000	6297500	3	3	3	3	3	3	3	3	3	44.8	44.8	44.8	7.79	30.922	45	0	48
975	E1LC06|E1LC06	tr|E1LC06|E1LC06_9FIRM	tr|E1LC06|E1LC06_9FIRM Recombination factor protein RarA OS=Veillonella atypica ACS-134-V-Col7a OX=866778 GN=HMPREF9684_0493 PE=3 SV=1	25	82205000	2622500	16	16	9	16	3	16	3	9	0	37.8	37.8	20	48.184	66.576	164	12	203
976	D1BMS3|D1BMS3	tr|D1BMS3|D1BMS3_VEIPT	tr|D1BMS3|D1BMS3_VEIPT DNA ligase OS=Veillonella parvula (strain ATCC 10790 / DSM 2008 / CCUG 5123 / JCM 12972 / NCTC 11810 / Te3) OX=479436 GN=ligA PE=3 SV=1	47	1493900	816430	7	4	4	3	4	0	3	0	3	10.3	6	6	74.104	2.3137	4	4	12
977	E1L9Z3|E1L9Z3	tr|E1L9Z3|E1L9Z3_9FIRM	tr|E1L9Z3|E1L9Z3_9FIRM Shikimate kinase OS=Veillonella atypica ACS-134-V-Col7a OX=866778 GN=aroK PE=3 SV=1	23	130970000	1581500	15	15	8	14	4	14	4	8	1	36	36	20.9	45.474	126.27	243	12	271
978	D1BR18|D1BR18	tr|D1BR18|D1BR18_VEIPT	tr|D1BR18|D1BR18_VEIPT Uncharacterized protein OS=Veillonella parvula (strain ATCC 10790 / DSM 2008 / CCUG 5123 / JCM 12972 / NCTC 11810 / Te3) OX=479436 GN=Vpar_0297 PE=4 SV=1	24	7931200	671920	4	4	4	4	2	4	2	4	2	8.8	8.8	8.8	43.433	4.8633	5	0	5
979	E1LDC1|E1LDC1	tr|E1LDC1|E1LDC1_9FIRM	tr|E1LDC1|E1LDC1_9FIRM Arylsulfatase OS=Veillonella atypica ACS-134-V-Col7a OX=866778 GN=HMPREF9684_0171 PE=4 SV=1	23	7286900	249640	5	5	4	5	1	5	1	4	0	11.6	11.6	10.5	69.982	32.563	8	1	11
980	D1BL44|D1BL44	tr|D1BL44|D1BL44_VEIPT	tr|D1BL44|D1BL44_VEIPT tRNA-specific adenosine deaminase OS=Veillonella parvula (strain ATCC 10790 / DSM 2008 / CCUG 5123 / JCM 12972 / NCTC 11810 / Te3) OX=479436 GN=tadA PE=3 SV=1	7	5195500	4995900	2	2	2	2	2	2	2	2	2	13	13	13	19.005	8.7261	2	1	4
981	E1LCZ2|E1LCZ2	tr|E1LCZ2|E1LCZ2_9FIRM	tr|E1LCZ2|E1LCZ2_9FIRM Uncharacterized protein OS=Veillonella atypica ACS-134-V-Col7a OX=866778 GN=HMPREF9684_0324 PE=4 SV=1	24	395360	919440	4	4	1	3	2	3	2	1	0	7.8	7.8	1.8	50.594	2.6025	6	1	10
982	D1BQV9|D1BQV9	tr|D1BQV9|D1BQV9_VEIPT	tr|D1BQV9|D1BQV9_VEIPT Adenosylmethionine-8-amino-7-oxononanoate aminotransferase OS=Veillonella parvula (strain ATCC 10790 / DSM 2008 / CCUG 5123 / JCM 12972 / NCTC 11810 / Te3) OX=479436 GN=bioA PE=3 SV=1	25	13637000	1674900	15	15	10	6	2	6	2	1	2	39.4	39.4	26.6	51.309	178.68	7	1	138
983	D1BPB7|D1BPB7	tr|D1BPB7|D1BPB7_VEIPT	tr|D1BPB7|D1BPB7_VEIPT Transcriptional regulator, GntR family OS=Veillonella parvula (strain ATCC 10790 / DSM 2008 / CCUG 5123 / JCM 12972 / NCTC 11810 / Te3) OX=479436 GN=Vpar_1548 PE=4 SV=1	15	2075300	2230100	9	9	5	3	5	3	5	1	2	40.4	40.4	23.9	26.584	58.957	4	3	34
984	E1LAH1|E1LAH1	tr|E1LAH1|E1LAH1_9FIRM	tr|E1LAH1|E1LAH1_9FIRM Orn/Lys/Arg decarboxylase, major domain protein OS=Veillonella atypica ACS-134-V-Col7a OX=866778 GN=HMPREF9684_1926 PE=3 SV=1	37	133820000	484580	30	30	30	30	3	30	3	30	3	52.9	52.9	52.9	81.658	313.67	373	19	392
985	D1BPX1|D1BPX1	tr|D1BPX1|D1BPX1_VEIPT	tr|D1BPX1|D1BPX1_VEIPT Major facilitator superfamily MFS_1 OS=Veillonella parvula (strain ATCC 10790 / DSM 2008 / CCUG 5123 / JCM 12972 / NCTC 11810 / Te3) OX=479436 GN=Vpar_1752 PE=4 SV=1	3	31853000	1994300	1	1	1	1	1	1	1	1	1	3.1	3.1	3.1	41.676	10.342	4	2	6
986	E1LE77|E1LE77	tr|E1LE77|E1LE77_9FIRM	tr|E1LE77|E1LE77_9FIRM Uncharacterized protein OS=Veillonella atypica ACS-134-V-Col7a OX=866778 GN=HMPREF9684_1143 PE=4 SV=1	27	115110000	2178200	17	17	16	17	5	17	5	16	4	46.8	46.8	44.3	43.482	142.53	75	7	104
987	E1LA15|E1LA15	tr|E1LA15|E1LA15_9FIRM	tr|E1LA15|E1LA15_9FIRM AAA_27 domain-containing protein OS=Veillonella atypica ACS-134-V-Col7a OX=866778 GN=HMPREF9684_1623 PE=4 SV=1	55	19536000	393470	23	21	21	23	2	21	1	21	1	26.3	25	25	109.94	77.882	101	0	103
988	D1BMC3|D1BMC3;E1L9L2|E1L9L2	tr|D1BMC3|D1BMC3_VEIPT;tr|E1L9L2|E1L9L2_9FIRM	tr|D1BMC3|D1BMC3_VEIPT Uncharacterized protein OS=Veillonella parvula (strain ATCC 10790 / DSM 2008 / CCUG 5123 / JCM 12972 / NCTC 11810 / Te3) OX=479436 GN=Vpar_0849 PE=4 SV=1;tr|E1L9L2|E1L9L2_9FIRM Uncharacterized protein OS=Veillonella atypica ACS-134-V	12	1314100	499760	2	2	2	1	2	1	2	1	2	6.8	6.8	6.8	29.208	2.8387	1	2	4
989	D1BQB2|D1BQB2	tr|D1BQB2|D1BQB2_VEIPT	tr|D1BQB2|D1BQB2_VEIPT Uncharacterized protein OS=Veillonella parvula (strain ATCC 10790 / DSM 2008 / CCUG 5123 / JCM 12972 / NCTC 11810 / Te3) OX=479436 GN=Vpar_0036 PE=4 SV=1	29	275740	982490	19	19	18	2	5	2	5	2	4	41.8	41.8	40	50.492	284.69	8	0	276
990	E1LDA7|E1LDA7	tr|E1LDA7|E1LDA7_9FIRM	tr|E1LDA7|E1LDA7_9FIRM Peptidase, S41 family OS=Veillonella atypica ACS-134-V-Col7a OX=866778 GN=HMPREF9684_0152 PE=3 SV=1	27	51240000	1332600	15	15	15	15	2	15	2	15	2	47.4	47.4	47.4	40.938	43.238	87	0	87
991	E1LA93|E1LA93	tr|E1LA93|E1LA93_9FIRM	tr|E1LA93|E1LA93_9FIRM Uncharacterized protein OS=Veillonella atypica ACS-134-V-Col7a OX=866778 GN=HMPREF9684_0855 PE=4 SV=1	13	151190000	882670	10	10	9	10	2	10	2	9	1	39	39	36	30.156	257.32	295	3	298
992	E1L919|E1L919	tr|E1L919|E1L919_9FIRM	tr|E1L919|E1L919_9FIRM Putative flagellar protein FliS OS=Veillonella atypica ACS-134-V-Col7a OX=866778 GN=HMPREF9684_0866 PE=3 SV=1	22	113540000	186140	10	10	10	10	2	10	2	10	2	26.9	26.9	26.9	47.224	127.55	87	0	87
993	E1LAS8|E1LAS8	tr|E1LAS8|E1LAS8_9FIRM	tr|E1LAS8|E1LAS8_9FIRM RND transporter, HAE1 family OS=Veillonella atypica ACS-134-V-Col7a OX=866778 GN=HMPREF9684_0264 PE=3 SV=1	48	94968000	4520400	18	16	16	17	2	16	1	16	1	18.7	16.5	16.5	115.56	189.36	264	3	277
994	E1LD54|E1LD54	tr|E1LD54|E1LD54_9FIRM	tr|E1LD54|E1LD54_9FIRM Glycosyl hydrolase family 3 N-terminal domain protein OS=Veillonella atypica ACS-134-V-Col7a OX=866778 GN=HMPREF9684_0389 PE=4 SV=1	23	54093000	69780000	9	9	5	8	1	8	1	5	0	21.5	21.5	13.6	41.749	16.756	34	0	43
995	E1L9N3|E1L9N3	tr|E1L9N3|E1L9N3_9FIRM	tr|E1L9N3|E1L9N3_9FIRM DNA mismatch repair protein MutL OS=Veillonella atypica ACS-134-V-Col7a OX=866778 GN=mutL PE=3 SV=1	32	27617000	1153500	14	14	7	13	2	13	2	7	0	22.9	22.9	12.4	72.69	74.081	69	3	82
996	E1LAE9|E1LAE9	tr|E1LAE9|E1LAE9_9FIRM	tr|E1LAE9|E1LAE9_9FIRM ABC transporter, substrate-binding protein, family 5 OS=Veillonella atypica ACS-134-V-Col7a OX=866778 GN=HMPREF9684_1904 PE=4 SV=1	28	62836000	15120000	11	9	9	11	1	9	1	9	1	22.5	18.2	18.2	60.472	77.444	52	4	76
997	D1BPZ5|D1BPZ5	tr|D1BPZ5|D1BPZ5_VEIPT	tr|D1BPZ5|D1BPZ5_VEIPT Carboxymuconolactone decarboxylase OS=Veillonella parvula (strain ATCC 10790 / DSM 2008 / CCUG 5123 / JCM 12972 / NCTC 11810 / Te3) OX=479436 GN=Vpar_1776 PE=4 SV=1	12	60489000	1443800	5	5	4	3	1	3	1	2	1	16.8	16.8	12.9	28.723	7.6916	4	1	9
998	E1L937|E1L937;D1BMX5|D1BMX5	tr|E1L937|E1L937_9FIRM;tr|D1BMX5|D1BMX5_VEIPT	tr|E1L937|E1L937_9FIRM CDP-diacylglycerol--serine O-phosphatidyltransferase OS=Veillonella atypica ACS-134-V-Col7a OX=866778 GN=pssA PE=3 SV=1;tr|D1BMX5|D1BMX5_VEIPT CDP-diacylglycerol--serine O-phosphatidyltransferase OS=Veillonella parvula (strain ATCC 1	2	356220000	6607200	1	1	1	1	1	1	1	1	1	4.5	4.5	4.5	23.706	8.566	30	4	49
999	E1LDK5|E1LDK5	tr|E1LDK5|E1LDK5_9FIRM	tr|E1LDK5|E1LDK5_9FIRM Uncharacterized protein OS=Veillonella atypica ACS-134-V-Col7a OX=866778 GN=HMPREF9684_1259 PE=4 SV=1	12	144270000	26915000	7	7	5	7	1	7	1	5	0	20.9	20.9	17.3	26.884	21.308	40	2	44
1000	E1LE74|E1LE74	tr|E1LE74|E1LE74_9FIRM	tr|E1LE74|E1LE74_9FIRM Signal peptidase I OS=Veillonella atypica ACS-134-V-Col7a OX=866778 GN=lepB PE=3 SV=1	14	94417000	6559600	10	10	9	10	1	10	1	9	0	62.1	62.1	56.8	21.883	126.48	94	4	99
1001	E1LAL2|E1LAL2	tr|E1LAL2|E1LAL2_9FIRM	tr|E1LAL2|E1LAL2_9FIRM Hydrogenase accessory protein HypB OS=Veillonella atypica ACS-134-V-Col7a OX=866778 GN=hypB PE=3 SV=1	12	108420000	294810	7	6	6	7	1	6	1	6	1	35.6	32.9	32.9	24.022	35.303	30	0	33
1002	E1L9Q8|E1L9Q8	tr|E1L9Q8|E1L9Q8_9FIRM	tr|E1L9Q8|E1L9Q8_9FIRM Uncharacterized protein OS=Veillonella atypica ACS-134-V-Col7a OX=866778 GN=HMPREF9684_1521 PE=4 SV=1	8	117170000	1098400	6	5	5	6	1	5	0	5	0	41.6	37	37	19.195	323.31	16	2	20
1003	D1BQZ0|D1BQZ0	tr|D1BQZ0|D1BQZ0_VEIPT	tr|D1BQZ0|D1BQZ0_VEIPT O-acetylhomoserine/O-acetylserine sulfhydrylase OS=Veillonella parvula (strain ATCC 10790 / DSM 2008 / CCUG 5123 / JCM 12972 / NCTC 11810 / Te3) OX=479436 GN=Vpar_0269 PE=3 SV=1	21	4751200	1215100	6	2	2	3	1	1	0	1	0	19.4	7.3	7.3	45.472	9.2669	8	1	24
1004	E1L9I8|E1L9I8	tr|E1L9I8|E1L9I8_9FIRM	tr|E1L9I8|E1L9I8_9FIRM Uncharacterized protein OS=Veillonella atypica ACS-134-V-Col7a OX=866778 GN=HMPREF9684_0794 PE=4 SV=1	9	10623000	43669000	2	2	2	2	1	2	1	2	1	11.2	11.2	11.2	17.541	6.8682	6	4	15
1005	E1LC29|E1LC29	tr|E1LC29|E1LC29_9FIRM	tr|E1LC29|E1LC29_9FIRM Glycosyltransferase, group 2 family protein OS=Veillonella atypica ACS-134-V-Col7a OX=866778 GN=HMPREF9684_0518 PE=4 SV=1	17	67278000	3442500	12	12	8	11	3	11	3	8	0	38.4	38.4	26.5	37.515	44.039	46	4	53
1006	E1LB59|E1LB59	tr|E1LB59|E1LB59_9FIRM	tr|E1LB59|E1LB59_9FIRM tRNA methylthiotransferase YqeV OS=Veillonella atypica ACS-134-V-Col7a OX=866778 GN=yqeV PE=4 SV=1	25	17232000	2274800	11	11	6	11	2	11	2	6	0	27.6	27.6	17.2	48.686	29.752	55	2	59
1007	E1LCZ3|E1LCZ3	tr|E1LCZ3|E1LCZ3_9FIRM	tr|E1LCZ3|E1LCZ3_9FIRM Uncharacterized protein OS=Veillonella atypica ACS-134-V-Col7a OX=866778 GN=HMPREF9684_0325 PE=4 SV=1	29	23318000	634220	6	6	4	5	2	5	2	3	1	12.4	12.4	9.5	47.588	2.9282	7	4	12
1008	E1LDU3|E1LDU3	tr|E1LDU3|E1LDU3_9FIRM	tr|E1LDU3|E1LDU3_9FIRM O-acetylhomoserine aminocarboxypropyltransferase/cysteine synthase OS=Veillonella atypica ACS-134-V-Col7a OX=866778 GN=HMPREF9684_0047 PE=3 SV=1	21	8518200	1215100	6	6	2	3	1	3	1	1	0	20.6	20.6	8.5	45.368	70.342	9	1	26
1009	E1L936|E1L936	tr|E1L936|E1L936_9FIRM	tr|E1L936|E1L936_9FIRM Glycosyltransferase, group 2 family protein OS=Veillonella atypica ACS-134-V-Col7a OX=866778 GN=HMPREF9684_1872 PE=4 SV=1	18	41913000	821270	10	7	7	9	2	7	0	7	0	27.1	16.9	16.9	48.581	92.986	57	1	73
1010	E1L9M4|E1L9M4;D1BMD6|D1BMD6	tr|E1L9M4|E1L9M4_9FIRM;tr|D1BMD6|D1BMD6_VEIPT	tr|E1L9M4|E1L9M4_9FIRM Phosphatidate cytidylyltransferase OS=Veillonella atypica ACS-134-V-Col7a OX=866778 GN=cdsA PE=3 SV=1;tr|D1BMD6|D1BMD6_VEIPT Phosphatidate cytidylyltransferase OS=Veillonella parvula (strain ATCC 10790 / DSM 2008 / CCUG 5123 / JCM 12	4	93940000	37551000	2	2	2	2	1	2	1	2	1	8.8	8.8	8.8	29.879	4.3397	3	3	9
1011	E1LAV1|E1LAV1;D1BMU9|D1BMU9	tr|E1LAV1|E1LAV1_9FIRM;tr|D1BMU9|D1BMU9_VEIPT	tr|E1LAV1|E1LAV1_9FIRM S-adenosylmethionine decarboxylase proenzyme family protein OS=Veillonella atypica ACS-134-V-Col7a OX=866778 GN=HMPREF9684_0289 PE=4 SV=1;tr|D1BMU9|D1BMU9_VEIPT S-adenosylmethionine decarboxylase related protein OS=Veillonella parvul	6	54131000	6179700	4	4	4	3	2	3	2	3	2	14.9	14.9	14.9	18.812	6.9394	6	4	14
1012	E1L985|E1L985	tr|E1L985|E1L985_9FIRM	tr|E1L985|E1L985_9FIRM Putative stage V sporulation protein B OS=Veillonella atypica ACS-134-V-Col7a OX=866778 GN=HMPREF9684_0710 PE=4 SV=1	15	15132000	4902400	2	1	1	2	1	1	0	1	0	3.9	1.5	1.5	55.942	3.9873	5	2	8
1013	E1LE59|E1LE59	tr|E1LE59|E1LE59_9FIRM	tr|E1LE59|E1LE59_9FIRM Transcriptional regulator, LysR family OS=Veillonella atypica ACS-134-V-Col7a OX=866778 GN=lysR PE=3 SV=1	19	17159000	463570	7	7	3	6	2	6	2	3	0	29.4	29.4	9.8	33.482	54.259	18	3	21
1014	E1L9H7|E1L9H7	tr|E1L9H7|E1L9H7_9FIRM	tr|E1L9H7|E1L9H7_9FIRM Transporter, DASS family OS=Veillonella atypica ACS-134-V-Col7a OX=866778 GN=HMPREF9684_0783 PE=3 SV=1	13	7904100	1264700	3	3	3	3	1	3	1	3	1	8.7	8.7	8.7	51.073	33.688	4	0	16
1015	E1LDB0|E1LDB0	tr|E1LDB0|E1LDB0_9FIRM	tr|E1LDB0|E1LDB0_9FIRM Glutamate 5-kinase OS=Veillonella atypica ACS-134-V-Col7a OX=866778 GN=proB PE=3 SV=1	17	9955700	3546600	7	7	5	4	1	4	1	4	0	16.6	16.6	12.1	40.194	7.7707	5	8	16
1016	E1LDL2|E1LDL2	tr|E1LDL2|E1LDL2_9FIRM	tr|E1LDL2|E1LDL2_9FIRM NLPA lipoprotein OS=Veillonella atypica ACS-134-V-Col7a OX=866778 GN=HMPREF9684_1266 PE=3 SV=1	14	10250000	9219300	6	6	2	3	3	3	3	1	0	26.6	26.6	9.9	30.224	29.751	5	4	17
1017	E1LCR3|E1LCR3	tr|E1LCR3|E1LCR3_9FIRM	tr|E1LCR3|E1LCR3_9FIRM DEAD/DEAH box helicase OS=Veillonella atypica ACS-134-V-Col7a OX=866778 GN=HMPREF9684_1677 PE=4 SV=1	26	10862000	5984400	10	8	8	10	4	8	2	8	2	22.2	17.6	17.6	48.048	27.809	41	3	46
1018	E1LDI6|E1LDI6	tr|E1LDI6|E1LDI6_9FIRM	tr|E1LDI6|E1LDI6_9FIRM Cobalt transport protein OS=Veillonella atypica ACS-134-V-Col7a OX=866778 GN=HMPREF9684_1240 PE=4 SV=1	13	19431000	1874800	5	3	3	4	1	2	0	2	0	22.1	14.4	14.4	24.287	3.7301	10	1	14
1019	E1LA60|E1LA60	tr|E1LA60|E1LA60_9FIRM	tr|E1LA60|E1LA60_9FIRM Uncharacterized protein OS=Veillonella atypica ACS-134-V-Col7a OX=866778 GN=HMPREF9684_0193 PE=4 SV=1	13	12427000	4553100	5	5	5	4	1	4	1	4	1	19.9	19.9	19.9	32.652	27.009	28	1	29
1020	E1LAB3|E1LAB3	tr|E1LAB3|E1LAB3_9FIRM	tr|E1LAB3|E1LAB3_9FIRM Protease HtpX homolog OS=Veillonella atypica ACS-134-V-Col7a OX=866778 GN=htpX PE=3 SV=1	13	27219000	1062300	6	6	6	5	2	5	2	5	2	30.4	30.4	30.4	30.795	27.478	44	2	52
1021	E1LCV7|E1LCV7	tr|E1LCV7|E1LCV7_9FIRM	tr|E1LCV7|E1LCV7_9FIRM Putative phage tail component domain protein OS=Veillonella atypica ACS-134-V-Col7a OX=866778 GN=HMPREF9684_0731 PE=4 SV=1	18	8724000	4082300	5	4	4	5	1	4	0	4	0	21.2	17.5	17.5	27.398	2.9509	8	1	11
1022	D1BL62|D1BL62	tr|D1BL62|D1BL62_VEIPT	tr|D1BL62|D1BL62_VEIPT Ribonuclease PH OS=Veillonella parvula (strain ATCC 10790 / DSM 2008 / CCUG 5123 / JCM 12972 / NCTC 11810 / Te3) OX=479436 GN=rph PE=3 SV=1	12	2282500	8051600	3	3	2	1	2	1	2	0	1	13.1	13.1	9.6	26.76	7.7562	3	3	11
1023	D1BLQ5|D1BLQ5	tr|D1BLQ5|D1BLQ5_VEIPT	tr|D1BLQ5|D1BLQ5_VEIPT DNA topoisomerase OS=Veillonella parvula (strain ATCC 10790 / DSM 2008 / CCUG 5123 / JCM 12972 / NCTC 11810 / Te3) OX=479436 GN=Vpar_0629 PE=3 SV=1	47	4831700	289190	16	16	8	6	5	6	5	0	2	22.8	22.8	13.5	87.682	28.286	10	5	29
1024	E1LCR2|E1LCR2	tr|E1LCR2|E1LCR2_9FIRM	tr|E1LCR2|E1LCR2_9FIRM DNA topoisomerase OS=Veillonella atypica ACS-134-V-Col7a OX=866778 GN=HMPREF9684_1676 PE=3 SV=1	48	5248200	283170	11	3	3	9	3	3	0	3	0	14.7	5.3	5.3	87.29	5.9939	14	3	22
1025	E1LCE1|E1LCE1	tr|E1LCE1|E1LCE1_9FIRM	tr|E1LCE1|E1LCE1_9FIRM 3-oxoacyl-[acyl-carrier-protein] synthase 2 OS=Veillonella atypica ACS-134-V-Col7a OX=866778 GN=fabF PE=3 SV=1	23	7132300	4569900	5	5	3	5	1	5	1	3	0	11.4	11.4	7.2	43.615	4.1088	9	5	17
1026	E1LDE7|E1LDE7	tr|E1LDE7|E1LDE7_9FIRM	tr|E1LDE7|E1LDE7_9FIRM Uncharacterized protein OS=Veillonella atypica ACS-134-V-Col7a OX=866778 GN=HMPREF9684_1325 PE=4 SV=1	50	2231900	191730	8	6	6	8	2	6	0	6	0	8.6	6.2	6.2	91.463	4.2048	10	2	12
1027	E1LBS3|E1LBS3;D1BNM3|D1BNM3	tr|E1LBS3|E1LBS3_9FIRM;tr|D1BNM3|D1BNM3_VEIPT	tr|E1LBS3|E1LBS3_9FIRM GMP reductase OS=Veillonella atypica ACS-134-V-Col7a OX=866778 GN=guaC PE=3 SV=1;tr|D1BNM3|D1BNM3_VEIPT GMP reductase OS=Veillonella parvula (strain ATCC 10790 / DSM 2008 / CCUG 5123 / JCM 12972 / NCTC 11810 / Te3) OX=479436 GN=guaC	21	5205600	228510	5	5	5	4	1	4	1	4	1	14.6	14.6	14.6	36.182	5.1787	6	1	8
1028	E1LBH4|E1LBH4	tr|E1LBH4|E1LBH4_9FIRM	tr|E1LBH4|E1LBH4_9FIRM Delta-aminolevulinic acid dehydratase OS=Veillonella atypica ACS-134-V-Col7a OX=866778 GN=hemB PE=3 SV=1	18	5877200	3791900	7	3	3	5	4	2	0	2	0	21.6	12.3	12.3	36.093	13.798	5	7	20
1029	D1BQS6|D1BQS6;E1LDQ1|E1LDQ1	tr|D1BQS6|D1BQS6_VEIPT;tr|E1LDQ1|E1LDQ1_9FIRM	tr|D1BQS6|D1BQS6_VEIPT Periplasmic solute binding protein OS=Veillonella parvula (strain ATCC 10790 / DSM 2008 / CCUG 5123 / JCM 12972 / NCTC 11810 / Te3) OX=479436 GN=Vpar_0202 PE=3 SV=1;tr|E1LDQ1|E1LDQ1_9FIRM ABC transporter, substrate-binding protein OS	19	2586000	2903000	6	6	6	3	1	3	1	3	1	17.6	17.6	17.6	33.874	5.1946	2	0	7
1030	D1BLK9|D1BLK9;E1LE45|E1LE45	tr|D1BLK9|D1BLK9_VEIPT;tr|E1LE45|E1LE45_9FIRM	tr|D1BLK9|D1BLK9_VEIPT Uncharacterized protein OS=Veillonella parvula (strain ATCC 10790 / DSM 2008 / CCUG 5123 / JCM 12972 / NCTC 11810 / Te3) OX=479436 GN=Vpar_0583 PE=4 SV=1;tr|E1LE45|E1LE45_9FIRM Uncharacterized protein OS=Veillonella atypica ACS-134-V	10	4044900	3256400	4	4	4	2	2	2	2	2	2	24.2	24.2	24.2	20.778	18.305	2	2	5
1031	E1LDT5|E1LDT5;D1BPA6|D1BPA6	tr|E1LDT5|E1LDT5_9FIRM;tr|D1BPA6|D1BPA6_VEIPT	tr|E1LDT5|E1LDT5_9FIRM ATP synthase subunit c OS=Veillonella atypica ACS-134-V-Col7a OX=866778 GN=atpE PE=3 SV=1;tr|D1BPA6|D1BPA6_VEIPT ATP synthase subunit c OS=Veillonella parvula (strain ATCC 10790 / DSM 2008 / CCUG 5123 / JCM 12972 / NCTC 11810 / Te3)	1	14411000000	5686900000	1	1	1	1	1	1	1	1	1	9.3	9.3	9.3	7.6252	8.6499	24	16	61
1032	E1LAH2|E1LAH2	tr|E1LAH2|E1LAH2_9FIRM	tr|E1LAH2|E1LAH2_9FIRM Putrescine transporter OS=Veillonella atypica ACS-134-V-Col7a OX=866778 GN=potE PE=3 SV=1	8	1245800000	340960	4	4	4	4	1	4	1	4	1	8.9	8.9	8.9	46.359	23.765	521	4	525
1033	E1L9P3|E1L9P3;D1BQ76|D1BQ76	tr|E1L9P3|E1L9P3_9FIRM;tr|D1BQ76|D1BQ76_VEIPT	tr|E1L9P3|E1L9P3_9FIRM 50S ribosomal protein L34 OS=Veillonella atypica ACS-134-V-Col7a OX=866778 GN=rpmH PE=3 SV=1;tr|D1BQ76|D1BQ76_VEIPT 50S ribosomal protein L34 OS=Veillonella parvula (strain ATCC 10790 / DSM 2008 / CCUG 5123 / JCM 12972 / NCTC 11810 /	1	1208500000	594300000	1	1	1	1	1	1	1	1	1	20.5	20.5	20.5	5.3964	7.4764	53	26	155
1034	E1LDT6|E1LDT6	tr|E1LDT6|E1LDT6_9FIRM	tr|E1LDT6|E1LDT6_9FIRM ATP synthase subunit b OS=Veillonella atypica ACS-134-V-Col7a OX=866778 GN=atpF PE=3 SV=1	13	1189000000	81421	11	11	11	11	2	11	2	11	2	57.6	57.6	57.6	18.652	116.49	65	0	88
1035	E1LBI7|E1LBI7	tr|E1LBI7|E1LBI7_9FIRM	tr|E1LBI7|E1LBI7_9FIRM Uncharacterized protein OS=Veillonella atypica ACS-134-V-Col7a OX=866778 GN=HMPREF9684_0598 PE=4 SV=1	5	993090000	845910	6	6	6	6	1	6	1	6	1	55	55	55	18.882	130.97	137	0	137
1036	E1LE97|E1LE97	tr|E1LE97|E1LE97_9FIRM	tr|E1LE97|E1LE97_9FIRM Outer membrane protein OS=Veillonella atypica ACS-134-V-Col7a OX=866778 GN=HMPREF9684_1163 PE=3 SV=1	10	947180000	157530	6	6	6	6	1	6	1	6	1	34.7	34.7	34.7	18.764	103.71	266	0	266
1037	E1LAI3|E1LAI3	tr|E1LAI3|E1LAI3_9FIRM	tr|E1LAI3|E1LAI3_9FIRM Cytochrome d ubiquinol oxidase, subunit II OS=Veillonella atypica ACS-134-V-Col7a OX=866778 GN=cydB PE=3 SV=1	3	744150000	3844800	1	1	1	1	1	1	1	1	1	2.4	2.4	2.4	37.668	5.3549	3	0	3
1038	E1LE99|E1LE99	tr|E1LE99|E1LE99_9FIRM	tr|E1LE99|E1LE99_9FIRM Gram-positive signal peptide protein, YSIRK family OS=Veillonella atypica ACS-134-V-Col7a OX=866778 GN=HMPREF9684_1165 PE=3 SV=1	11	654050000	3350200	6	6	6	6	1	6	1	6	1	39.7	39.7	39.7	16.697	34.402	100	1	101
1039	E1LAA0|E1LAA0;D1BMG2|D1BMG2	tr|E1LAA0|E1LAA0_9FIRM;tr|D1BMG2|D1BMG2_VEIPT	tr|E1LAA0|E1LAA0_9FIRM 30S ribosomal protein S21 OS=Veillonella atypica ACS-134-V-Col7a OX=866778 GN=rpsU PE=3 SV=1;tr|D1BMG2|D1BMG2_VEIPT 30S ribosomal protein S21 OS=Veillonella parvula (strain ATCC 10790 / DSM 2008 / CCUG 5123 / JCM 12972 / NCTC 11810 /	2	470800000	6.208e+09	6	6	6	3	6	3	6	3	6	49.2	49.2	49.2	6.9761	38.986	15	107	132
1040	E1LCM2|E1LCM2;D1BM40|D1BM40	tr|E1LCM2|E1LCM2_9FIRM;tr|D1BM40|D1BM40_VEIPT	tr|E1LCM2|E1LCM2_9FIRM Branched-chain amino acid ABC transporter, permease protein OS=Veillonella atypica ACS-134-V-Col7a OX=866778 GN=HMPREF9684_1809 PE=4 SV=1;tr|D1BM40|D1BM40_VEIPT Inner-membrane translocator OS=Veillonella parvula (strain ATCC 10790 /	7	397270000	70337000	2	2	2	2	1	2	1	2	1	5.9	5.9	5.9	30.322	6.3126	4	4	12
1041	E1LCU0|E1LCU0	tr|E1LCU0|E1LCU0_9FIRM	tr|E1LCU0|E1LCU0_9FIRM Transcriptional regulator, LysR family OS=Veillonella atypica ACS-134-V-Col7a OX=866778 GN=lysR PE=3 SV=1	17	376470000	14415000	7	4	4	5	4	4	1	4	1	25.1	15.1	15.1	34.465	5.4657	13	3	31
1042	E1LAB0|E1LAB0;D1BMH2|D1BMH2	tr|E1LAB0|E1LAB0_9FIRM;tr|D1BMH2|D1BMH2_VEIPT	tr|E1LAB0|E1LAB0_9FIRM UPF0735 ACT domain-containing protein HMPREF9684_1020 OS=Veillonella atypica ACS-134-V-Col7a OX=866778 GN=HMPREF9684_1020 PE=3 SV=1;tr|D1BMH2|D1BMH2_VEIPT UPF0735 ACT domain-containing protein Vpar_0898 OS=Veillonella parvula (strain	7	350220000	32254000	3	3	3	2	3	2	3	2	3	23.5	23.5	23.5	16.698	14.451	2	10	16
1043	E1LBG4|E1LBG4	tr|E1LBG4|E1LBG4_9FIRM	tr|E1LBG4|E1LBG4_9FIRM Polyamine aminopropyltransferase OS=Veillonella atypica ACS-134-V-Col7a OX=866778 GN=speE PE=3 SV=1	16	285510000	11645000	6	3	3	4	3	2	0	2	0	20.8	10.4	10.4	31.764	3.447	9	11	23
1044	D1BLU5|D1BLU5	tr|D1BLU5|D1BLU5_VEIPT	tr|D1BLU5|D1BLU5_VEIPT Polysaccharide biosynthesis protein CapD OS=Veillonella parvula (strain ATCC 10790 / DSM 2008 / CCUG 5123 / JCM 12972 / NCTC 11810 / Te3) OX=479436 GN=Vpar_0669 PE=3 SV=1	29	264550000	9709200	5	4	4	1	1	1	1	1	1	7.7	6.4	6.4	68.288	11.628	4	1	19
1045	E1LD94|E1LD94	tr|E1LD94|E1LD94_9FIRM	tr|E1LD94|E1LD94_9FIRM ABC transporter, ATP-binding protein OS=Veillonella atypica ACS-134-V-Col7a OX=866778 GN=HMPREF9684_0139 PE=4 SV=1	11	247140000	4584900	8	8	7	8	1	8	1	7	0	35.1	35.1	32.2	26.304	108.53	35	0	35
1046	E1LB68|E1LB68	tr|E1LB68|E1LB68_9FIRM	tr|E1LB68|E1LB68_9FIRM Polysaccharide deacetylase OS=Veillonella atypica ACS-134-V-Col7a OX=866778 GN=HMPREF9684_1440 PE=4 SV=1	15	203910000	3019500	7	5	5	5	2	5	0	5	0	29.1	19.8	19.8	30.086	12.48	42	14	62
1047	D1BL29|D1BL29;E1LB79|E1LB79	tr|D1BL29|D1BL29_VEIPT;tr|E1LB79|E1LB79_9FIRM	tr|D1BL29|D1BL29_VEIPT Uncharacterized protein OS=Veillonella parvula (strain ATCC 10790 / DSM 2008 / CCUG 5123 / JCM 12972 / NCTC 11810 / Te3) OX=479436 GN=Vpar_0402 PE=4 SV=1;tr|E1LB79|E1LB79_9FIRM Uncharacterized protein OS=Veillonella atypica ACS-134-V	2	190250000	19327000	1	1	1	1	1	1	1	1	1	6	6	6	13.085	2.1448	3	1	5
1048	D1BPE9|D1BPE9;E1LA89|E1LA89	tr|D1BPE9|D1BPE9_VEIPT;tr|E1LA89|E1LA89_9FIRM	tr|D1BPE9|D1BPE9_VEIPT Cysteine synthase OS=Veillonella parvula (strain ATCC 10790 / DSM 2008 / CCUG 5123 / JCM 12972 / NCTC 11810 / Te3) OX=479436 GN=Vpar_1580 PE=3 SV=1;tr|E1LA89|E1LA89_9FIRM Cysteine synthase OS=Veillonella atypica ACS-134-V-Col7a OX=86	10	164670000	1755800	6	6	6	1	2	1	2	1	2	19.9	19.9	19.9	32.34	6.7097	1	2	17
1049	E1LD36|E1LD36	tr|E1LD36|E1LD36_9FIRM	tr|E1LD36|E1LD36_9FIRM Transporter, MotA/TolQ/ExbB proton channel family protein OS=Veillonella atypica ACS-134-V-Col7a OX=866778 GN=HMPREF9684_0370 PE=3 SV=1	6	145010000	6546400	3	2	2	3	1	2	0	2	0	14.9	10.9	10.9	21.994	14.571	18	0	19
1050	E1LDU1|E1LDU1	tr|E1LDU1|E1LDU1_9FIRM	tr|E1LDU1|E1LDU1_9FIRM ATP synthase epsilon chain OS=Veillonella atypica ACS-134-V-Col7a OX=866778 GN=atpC PE=3 SV=1	5	141280000	111460000	3	2	2	3	1	2	0	2	0	28.1	19.3	19.3	14.826	8.3138	9	4	13
1051	E1LAC3|E1LAC3	tr|E1LAC3|E1LAC3_9FIRM	tr|E1LAC3|E1LAC3_9FIRM Putative alpha-ribazole phosphatase OS=Veillonella atypica ACS-134-V-Col7a OX=866778 GN=HMPREF9684_1033 PE=4 SV=1	16	138310000	990400	9	9	8	9	1	9	1	8	1	42.5	42.5	38.7	24.171	107.25	88	0	88
1052	E1LBY9|E1LBY9	tr|E1LBY9|E1LBY9_9FIRM	tr|E1LBY9|E1LBY9_9FIRM CobQ/CobB/MinD/ParA nucleotide binding domain protein OS=Veillonella atypica ACS-134-V-Col7a OX=866778 GN=HMPREF9684_0475 PE=4 SV=1	16	128870000	3402500	11	11	10	11	1	11	1	10	0	37.8	37.8	34.2	34.194	55.718	169	5	174
1053	E1LB98|E1LB98	tr|E1LB98|E1LB98_9FIRM	tr|E1LB98|E1LB98_9FIRM ABC transporter, permease protein OS=Veillonella atypica ACS-134-V-Col7a OX=866778 GN=metI PE=3 SV=1	8	119860000	10599000	3	2	2	3	1	2	0	2	0	12.9	9.7	9.7	22.914	25.009	15	2	19
1054	E1L932|E1L932	tr|E1L932|E1L932_9FIRM	tr|E1L932|E1L932_9FIRM Glycosyltransferase, group 1 family protein OS=Veillonella atypica ACS-134-V-Col7a OX=866778 GN=HMPREF9684_0879 PE=4 SV=1	21	114710000	2432700	12	12	12	10	3	10	3	10	3	29.8	29.8	29.8	43.803	36.64	79	2	81
1055	E1LCA4|E1LCA4	tr|E1LCA4|E1LCA4_9FIRM	tr|E1LCA4|E1LCA4_9FIRM Branched-chain amino acid ABC transporter, permease protein OS=Veillonella atypica ACS-134-V-Col7a OX=866778 GN=HMPREF9684_1715 PE=4 SV=1	8	106970000	19442000	3	3	2	3	1	3	1	2	0	6	6	4.2	36.444	16.813	29	3	36
1056	E1LDN3|E1LDN3	tr|E1LDN3|E1LDN3_9FIRM	tr|E1LDN3|E1LDN3_9FIRM Uncharacterized protein OS=Veillonella atypica ACS-134-V-Col7a OX=866778 GN=HMPREF9684_1288 PE=3 SV=1	8	103110000	87365000	2	1	1	2	1	1	0	1	0	8.6	4.6	4.6	36.769	2.0343	83	23	129
1057	E1LDB4|E1LDB4	tr|E1LDB4|E1LDB4_9FIRM	tr|E1LDB4|E1LDB4_9FIRM Cell envelope-like function transcriptional attenuator common domain protein OS=Veillonella atypica ACS-134-V-Col7a OX=866778 GN=HMPREF9684_0159 PE=3 SV=1	19	84860000	347120	12	12	12	12	1	12	1	12	1	38.5	38.5	38.5	43.332	129.66	70	0	70
1058	E1LAL7|E1LAL7;D1BP81|D1BP81	tr|E1LAL7|E1LAL7_9FIRM;tr|D1BP81|D1BP81_VEIPT	tr|E1LAL7|E1LAL7_9FIRM 50S ribosomal protein L33 OS=Veillonella atypica ACS-134-V-Col7a OX=866778 GN=rpmG PE=3 SV=1;tr|D1BP81|D1BP81_VEIPT 50S ribosomal protein L33 OS=Veillonella parvula (strain ATCC 10790 / DSM 2008 / CCUG 5123 / JCM 12972 / NCTC 11810 /	2	81592000	609870000	2	2	2	1	1	1	1	1	1	42.9	42.9	42.9	5.9058	7.1692	1	8	14
1059	E1LC80|E1LC80	tr|E1LC80|E1LC80_9FIRM	tr|E1LC80|E1LC80_9FIRM Uncharacterized protein OS=Veillonella atypica ACS-134-V-Col7a OX=866778 GN=HMPREF9684_1961 PE=3 SV=1	11	72726000	8517100	3	3	3	3	1	3	1	3	1	8.6	8.6	8.6	32.4	6.3578	5	0	5
1060	D1BNT1|D1BNT1	tr|D1BNT1|D1BNT1_VEIPT	tr|D1BNT1|D1BNT1_VEIPT MazG family protein OS=Veillonella parvula (strain ATCC 10790 / DSM 2008 / CCUG 5123 / JCM 12972 / NCTC 11810 / Te3) OX=479436 GN=Vpar_1360 PE=4 SV=1	17	72214000	33802000	6	5	5	1	6	0	5	0	5	21.1	17.6	17.6	29.954	5.5542	4	7	12
1061	D1BP26|D1BP26	tr|D1BP26|D1BP26_VEIPT	tr|D1BP26|D1BP26_VEIPT Nicotinate-nucleotide--dimethylbenzimidazole phosphoribosyltransferase OS=Veillonella parvula (strain ATCC 10790 / DSM 2008 / CCUG 5123 / JCM 12972 / NCTC 11810 / Te3) OX=479436 GN=arsB PE=3 SV=1	18	71243000	5832200	3	3	2	1	3	1	3	0	2	7.8	7.8	6.2	40.721	7.3353	2	12	15
1062	E1LBE3|E1LBE3	tr|E1LBE3|E1LBE3_9FIRM	tr|E1LBE3|E1LBE3_9FIRM Uncharacterized protein OS=Veillonella atypica ACS-134-V-Col7a OX=866778 GN=HMPREF9684_1415 PE=4 SV=1	8	70202000	2343300	5	5	5	4	1	4	1	4	1	31.3	31.3	31.3	16.868	27.699	45	0	46
1063	E1LC42|E1LC42	tr|E1LC42|E1LC42_9FIRM	tr|E1LC42|E1LC42_9FIRM Transporter, DASS family OS=Veillonella atypica ACS-134-V-Col7a OX=866778 GN=HMPREF9684_0532 PE=3 SV=1	12	65047000	5266900	4	4	3	4	1	4	1	3	0	9.5	9.5	7.3	53.654	58.511	16	1	17
1064	E1LBD0|E1LBD0	tr|E1LBD0|E1LBD0_9FIRM	tr|E1LBD0|E1LBD0_9FIRM Uncharacterized protein OS=Veillonella atypica ACS-134-V-Col7a OX=866778 GN=HMPREF9684_1401 PE=4 SV=1	7	64591000	3900800	4	3	3	4	1	3	0	3	0	21.4	17	17	20.775	4.0371	10	0	18
1065	E1LCS9|E1LCS9	tr|E1LCS9|E1LCS9_9FIRM	tr|E1LCS9|E1LCS9_9FIRM Putative hydrogenase expression/formation protein HypE OS=Veillonella atypica ACS-134-V-Col7a OX=866778 GN=HMPREF9684_1693 PE=4 SV=1	12	64537000	706340	5	5	5	5	1	5	1	5	1	31.7	31.7	31.7	20.296	34.463	39	0	39
1066	D1BLJ6|D1BLJ6	tr|D1BLJ6|D1BLJ6_VEIPT	tr|D1BLJ6|D1BLJ6_VEIPT Uncharacterized protein OS=Veillonella parvula (strain ATCC 10790 / DSM 2008 / CCUG 5123 / JCM 12972 / NCTC 11810 / Te3) OX=479436 GN=Vpar_0570 PE=4 SV=1	3	61630000	1270400000	2	2	2	1	2	1	2	1	2	24.6	24.6	24.6	7.1063	10.237	0	8	9
1067	E1LDA6|E1LDA6	tr|E1LDA6|E1LDA6_9FIRM	tr|E1LDA6|E1LDA6_9FIRM Peptidase, M23 family OS=Veillonella atypica ACS-134-V-Col7a OX=866778 GN=HMPREF9684_0151 PE=4 SV=1	17	60762000	32505000	11	8	8	11	4	8	1	8	1	28.1	21.9	21.9	43.181	25.364	30	7	37
1068	E1LBA3|E1LBA3	tr|E1LBA3|E1LBA3_9FIRM	tr|E1LBA3|E1LBA3_9FIRM DUF1232 domain-containing protein OS=Veillonella atypica ACS-134-V-Col7a OX=866778 GN=HMPREF9684_1476 PE=4 SV=1	7	58659000	17864000	3	3	2	3	1	3	1	2	0	17	17	11.6	12.59	2.8367	50	0	50
1069	E1LBY5|E1LBY5	tr|E1LBY5|E1LBY5_9FIRM	tr|E1LBY5|E1LBY5_9FIRM Cell shape-determining protein MreB OS=Veillonella atypica ACS-134-V-Col7a OX=866778 GN=mreB PE=3 SV=1	25	57930000	2020600	9	9	9	8	1	8	1	8	1	27	27	27	37.774	13.349	11	1	12
1070	E1LBI2|E1LBI2	tr|E1LBI2|E1LBI2_9FIRM	tr|E1LBI2|E1LBI2_9FIRM Pyridoxal phosphate homeostasis protein OS=Veillonella atypica ACS-134-V-Col7a OX=866778 GN=HMPREF9684_0593 PE=3 SV=1	15	53264000	1373200	7	5	5	5	1	4	0	4	0	24.1	17.5	17.5	25.668	5.3717	8	1	12
1071	E1LBA1|E1LBA1	tr|E1LBA1|E1LBA1_9FIRM	tr|E1LBA1|E1LBA1_9FIRM Oxidoreductase, short chain dehydrogenase/reductase family protein OS=Veillonella atypica ACS-134-V-Col7a OX=866778 GN=HMPREF9684_1474 PE=4 SV=1	13	52302000	5041600	7	7	5	7	1	7	1	5	0	40	40	28.2	27.305	98.472	83	1	84
1072	E1LA51|E1LA51;D1BR58|D1BR58	tr|E1LA51|E1LA51_9FIRM;tr|D1BR58|D1BR58_VEIPT	tr|E1LA51|E1LA51_9FIRM Single-stranded DNA-binding protein OS=Veillonella atypica ACS-134-V-Col7a OX=866778 GN=HMPREF9684_0904 PE=3 SV=1;tr|D1BR58|D1BR58_VEIPT Single-stranded DNA-binding protein OS=Veillonella parvula (strain ATCC 10790 / DSM 2008 / CCUG	6	50107000	20299000	2	2	2	1	2	1	2	1	2	15.9	15.9	15.9	14.448	3.8253	2	2	4
1073	E1LAF8|E1LAF8	tr|E1LAF8|E1LAF8_9FIRM	tr|E1LAF8|E1LAF8_9FIRM Putative L-lactate dehydrogenase OS=Veillonella atypica ACS-134-V-Col7a OX=866778 GN=HMPREF9684_1913 PE=3 SV=1	16	45233000	926570	5	5	4	5	2	5	2	4	1	15.2	15.2	12.1	34.458	8.2446	30	3	33
1074	E1LE70|E1LE70	tr|E1LE70|E1LE70_9FIRM	tr|E1LE70|E1LE70_9FIRM Cof-like hydrolase OS=Veillonella atypica ACS-134-V-Col7a OX=866778 GN=HMPREF9684_1136 PE=4 SV=1	13	45164000	5688900	4	4	4	4	1	4	1	4	1	18.1	18.1	18.1	30.325	7.8988	14	0	14
1075	E1LCW0|E1LCW0	tr|E1LCW0|E1LCW0_9FIRM	tr|E1LCW0|E1LCW0_9FIRM DNA helicase OS=Veillonella atypica ACS-134-V-Col7a OX=866778 GN=HMPREF9684_0734 PE=4 SV=1	70	43425000	5090300	15	15	13	15	1	15	1	13	1	13.9	13.9	12	133.66	14.327	26	0	26
1076	D1BPA0|D1BPA0	tr|D1BPA0|D1BPA0_VEIPT	tr|D1BPA0|D1BPA0_VEIPT ATP synthase epsilon chain OS=Veillonella parvula (strain ATCC 10790 / DSM 2008 / CCUG 5123 / JCM 12972 / NCTC 11810 / Te3) OX=479436 GN=atpC PE=3 SV=1	7	43344000	163210000	4	4	3	1	4	1	4	0	3	34.1	34.1	25.2	14.812	62.647	5	10	16
1077	E1L9G0|E1L9G0	tr|E1L9G0|E1L9G0_9FIRM	tr|E1L9G0|E1L9G0_9FIRM DNA helicase OS=Veillonella atypica ACS-134-V-Col7a OX=866778 GN=recQ PE=3 SV=1	41	43071000	248700	6	5	5	5	1	5	1	5	1	8.7	7.4	7.4	68.315	6.3211	12	0	13
1078	E1LC10|E1LC10	tr|E1LC10|E1LC10_9FIRM	tr|E1LC10|E1LC10_9FIRM Uncharacterized protein OS=Veillonella atypica ACS-134-V-Col7a OX=866778 GN=HMPREF9684_0497 PE=4 SV=1	20	42438000	983760	6	6	6	6	1	6	1	6	1	19.9	19.9	19.9	39.443	62.885	15	4	20
1079	E1LBA9|E1LBA9	tr|E1LBA9|E1LBA9_9FIRM	tr|E1LBA9|E1LBA9_9FIRM Histone deacetylase family OS=Veillonella atypica ACS-134-V-Col7a OX=866778 GN=HMPREF9684_1482 PE=3 SV=1	19	39464000	28916000	6	6	6	5	1	5	1	5	1	14.4	14.4	14.4	51.475	11.171	17	0	18
1080	E1LCP0|E1LCP0	tr|E1LCP0|E1LCP0_9FIRM	tr|E1LCP0|E1LCP0_9FIRM 30S ribosomal protein S20 OS=Veillonella atypica ACS-134-V-Col7a OX=866778 GN=rpsT PE=3 SV=1	3	33987000	1.7188e+09	3	1	1	2	2	1	0	1	0	41.9	14	14	9.0654	5.5593	4	64	80
1081	D1BM51|D1BM51	tr|D1BM51|D1BM51_VEIPT	tr|D1BM51|D1BM51_VEIPT 30S ribosomal protein S20 OS=Veillonella parvula (strain ATCC 10790 / DSM 2008 / CCUG 5123 / JCM 12972 / NCTC 11810 / Te3) OX=479436 GN=rpsT PE=3 SV=1	3	33987000	1.7188e+09	3	3	1	1	3	1	3	0	1	41.9	41.9	14	9.0744	58.141	4	64	80
1082	E1L9M6|E1L9M6	tr|E1L9M6|E1L9M6_9FIRM	tr|E1L9M6|E1L9M6_9FIRM Zinc metalloprotease OS=Veillonella atypica ACS-134-V-Col7a OX=866778 GN=rseP PE=3 SV=1	14	33051000	3006500	7	7	7	7	1	7	1	7	1	27.2	27.2	27.2	36.199	9.9507	25	0	25
1083	E1L9Q9|E1L9Q9	tr|E1L9Q9|E1L9Q9_9FIRM	tr|E1L9Q9|E1L9Q9_9FIRM Peptidase, M23 family OS=Veillonella atypica ACS-134-V-Col7a OX=866778 GN=HMPREF9684_1522 PE=4 SV=1	14	31364000	21990000	4	3	3	4	2	3	1	3	1	14.8	11.1	11.1	34.417	6.9826	3	2	7
1084	E1LCD0|E1LCD0;D1BLW7|D1BLW7	tr|E1LCD0|E1LCD0_9FIRM;tr|D1BLW7|D1BLW7_VEIPT	tr|E1LCD0|E1LCD0_9FIRM Rubredoxin OS=Veillonella atypica ACS-134-V-Col7a OX=866778 GN=HMPREF9684_1741 PE=4 SV=1;tr|D1BLW7|D1BLW7_VEIPT Rubredoxin-type Fe(Cys)4 protein OS=Veillonella parvula (strain ATCC 10790 / DSM 2008 / CCUG 5123 / JCM 12972 / NCTC 1181	2	31330000	93706000	1	1	1	1	1	1	1	1	1	38.6	38.6	38.6	5.0087	7.4948	8	4	13
1085	E1LAU8|E1LAU8	tr|E1LAU8|E1LAU8_9FIRM	tr|E1LAU8|E1LAU8_9FIRM Protein-arginine kinase OS=Veillonella atypica ACS-134-V-Col7a OX=866778 GN=mcsB PE=3 SV=1	25	31215000	4355000	9	9	8	9	2	9	2	8	1	23.4	23.4	20.6	39.921	27.847	43	4	47
1086	E1LE90|E1LE90	tr|E1LE90|E1LE90_9FIRM	tr|E1LE90|E1LE90_9FIRM Lipid-A-disaccharide synthase OS=Veillonella atypica ACS-134-V-Col7a OX=866778 GN=lpxB PE=4 SV=1	18	31024000	23363000	8	4	4	7	2	4	0	4	0	23.9	14.2	14.2	42.341	10.403	6	2	8
1087	E1LE63|E1LE63	tr|E1LE63|E1LE63_9FIRM	tr|E1LE63|E1LE63_9FIRM Carbamoyl-phosphate synthase small chain OS=Veillonella atypica ACS-134-V-Col7a OX=866778 GN=carA PE=3 SV=1	12	29970000	450740	5	5	2	5	2	5	2	2	0	13.5	13.5	4.8	39.37	23.428	9	2	11
1088	D1BLC7|D1BLC7	tr|D1BLC7|D1BLC7_VEIPT	tr|D1BLC7|D1BLC7_VEIPT Ppx/GppA phosphatase OS=Veillonella parvula (strain ATCC 10790 / DSM 2008 / CCUG 5123 / JCM 12972 / NCTC 11810 / Te3) OX=479436 GN=Vpar_0501 PE=4 SV=1	16	27501000	2572000	4	4	4	1	2	1	2	1	2	16.4	16.4	16.4	33.378	9.5116	2	3	11
1089	D1BM22|D1BM22	tr|D1BM22|D1BM22_VEIPT	tr|D1BM22|D1BM22_VEIPT Putative transcriptional regulator, GntR family OS=Veillonella parvula (strain ATCC 10790 / DSM 2008 / CCUG 5123 / JCM 12972 / NCTC 11810 / Te3) OX=479436 GN=Vpar_0748 PE=4 SV=1	23	27203000	1784800	4	4	3	1	3	1	3	0	3	6.8	6.8	5.3	43.665	2.1622	0	3	6
1090	E1LCG5|E1LCG5	tr|E1LCG5|E1LCG5_9FIRM	tr|E1LCG5|E1LCG5_9FIRM 3D domain protein OS=Veillonella atypica ACS-134-V-Col7a OX=866778 GN=HMPREF9684_1652 PE=4 SV=1	12	26954000	1188700	4	4	3	4	1	4	1	3	0	16.9	16.9	13.4	21.913	7.0404	11	1	12
1091	E1LCZ9|E1LCZ9;D1BPT6|D1BPT6	tr|E1LCZ9|E1LCZ9_9FIRM;tr|D1BPT6|D1BPT6_VEIPT	tr|E1LCZ9|E1LCZ9_9FIRM LUD_dom domain-containing protein OS=Veillonella atypica ACS-134-V-Col7a OX=866778 GN=HMPREF9684_0332 PE=4 SV=1;tr|D1BPT6|D1BPT6_VEIPT LUD_dom domain-containing protein OS=Veillonella parvula (strain ATCC 10790 / DSM 2008 / CCUG 5123	14	26248000	1082100	4	4	4	4	1	4	1	4	1	14.7	14.7	14.7	24.998	4.306	18	0	20
1092	E1L9L7|E1L9L7	tr|E1L9L7|E1L9L7_9FIRM	tr|E1L9L7|E1L9L7_9FIRM Small ribosomal subunit biogenesis GTPase RsgA OS=Veillonella atypica ACS-134-V-Col7a OX=866778 GN=rsgA PE=3 SV=1	18	25825000	1863400	4	4	4	4	1	4	1	4	1	14.3	14.3	14.3	32.466	8.1054	20	0	20
1093	D1BLG4|D1BLG4	tr|D1BLG4|D1BLG4_VEIPT	tr|D1BLG4|D1BLG4_VEIPT Lipid-A-disaccharide synthase OS=Veillonella parvula (strain ATCC 10790 / DSM 2008 / CCUG 5123 / JCM 12972 / NCTC 11810 / Te3) OX=479436 GN=Vpar_0538 PE=4 SV=1	20	25625000	21575000	10	10	6	3	7	3	7	0	5	28.2	28.2	18.4	42.404	17.747	3	10	17
1094	E1LB91|E1LB91	tr|E1LB91|E1LB91_9FIRM	tr|E1LB91|E1LB91_9FIRM UPF0597 protein HMPREF9684_1463 OS=Veillonella atypica ACS-134-V-Col7a OX=866778 GN=HMPREF9684_1463 PE=3 SV=1	22	24987000	1724500	8	8	5	7	2	7	2	5	0	20	20	12.5	44.01	17.208	16	2	19
1095	D1BLB4|D1BLB4	tr|D1BLB4|D1BLB4_VEIPT	tr|D1BLB4|D1BLB4_VEIPT Beta-lactamase class A-like protein OS=Veillonella parvula (strain ATCC 10790 / DSM 2008 / CCUG 5123 / JCM 12972 / NCTC 11810 / Te3) OX=479436 GN=Vpar_0488 PE=1 SV=1	19	24893000	415080	4	4	4	1	1	1	1	1	1	15.8	15.8	15.8	30.967	2.4412	2	1	6
1096	E1LAU9|E1LAU9	tr|E1LAU9|E1LAU9_9FIRM	tr|E1LAU9|E1LAU9_9FIRM UVR domain-containing protein OS=Veillonella atypica ACS-134-V-Col7a OX=866778 GN=HMPREF9684_0287 PE=4 SV=1	11	24805000	457830	5	5	5	5	1	5	1	5	1	29.1	29.1	29.1	20.734	15.711	24	1	25
1097	E1LE96|E1LE96	tr|E1LE96|E1LE96_9FIRM	tr|E1LE96|E1LE96_9FIRM UDP-3-O-acylglucosamine N-acyltransferase OS=Veillonella atypica ACS-134-V-Col7a OX=866778 GN=lpxD PE=3 SV=1	15	24090000	5788800	4	4	3	4	1	4	1	3	0	12.8	12.8	11.1	36.588	10.442	41	0	41
1098	E1LBI0|E1LBI0	tr|E1LBI0|E1LBI0_9FIRM	tr|E1LBI0|E1LBI0_9FIRM Pyrroline-5-carboxylate reductase OS=Veillonella atypica ACS-134-V-Col7a OX=866778 GN=proC PE=3 SV=1	13	23448000	1012700	5	2	2	5	1	2	0	2	0	23.3	6.9	6.9	26.752	3.5615	15	2	17
1099	D1BPJ0|D1BPJ0;E1L9Z8|E1L9Z8	tr|D1BPJ0|D1BPJ0_VEIPT;tr|E1L9Z8|E1L9Z8_9FIRM	tr|D1BPJ0|D1BPJ0_VEIPT Xanthine/uracil/vitamin C permease OS=Veillonella parvula (strain ATCC 10790 / DSM 2008 / CCUG 5123 / JCM 12972 / NCTC 11810 / Te3) OX=479436 GN=Vpar_1621 PE=3 SV=1;tr|E1L9Z8|E1L9Z8_9FIRM Putative permease OS=Veillonella atypica ACS-	5	22591000	1.8842e+09	2	2	2	1	1	1	1	1	1	2.9	2.9	2.9	47.433	2.464	9	28	62
1100	E1LDR9|E1LDR9	tr|E1LDR9|E1LDR9_9FIRM	tr|E1LDR9|E1LDR9_9FIRM Uncharacterized protein OS=Veillonella atypica ACS-134-V-Col7a OX=866778 GN=HMPREF9684_0134 PE=4 SV=1	20	22467000	756990	7	7	7	6	1	6	1	6	1	20.8	20.8	20.8	41.191	8.5998	12	0	12
1101	D1BPF0|D1BPF0	tr|D1BPF0|D1BPF0_VEIPT	tr|D1BPF0|D1BPF0_VEIPT Transcriptional regulator, BadM/Rrf2 family OS=Veillonella parvula (strain ATCC 10790 / DSM 2008 / CCUG 5123 / JCM 12972 / NCTC 11810 / Te3) OX=479436 GN=Vpar_1581 PE=4 SV=1	5	22292000	6325500	2	1	1	1	2	0	1	0	1	12.8	7.4	7.4	16.598	1.9947	6	5	14
1102	E1LAT1|E1LAT1	tr|E1LAT1|E1LAT1_9FIRM	tr|E1LAT1|E1LAT1_9FIRM 6-carboxyhexanoate--CoA ligase OS=Veillonella atypica ACS-134-V-Col7a OX=866778 GN=bioW PE=3 SV=1	18	22214000	3556500	5	5	5	5	1	5	1	5	1	19.4	19.4	19.4	26.963	10.521	17	0	17
1103	E1LDR8|E1LDR8	tr|E1LDR8|E1LDR8_9FIRM	tr|E1LDR8|E1LDR8_9FIRM Methyltransferase domain protein OS=Veillonella atypica ACS-134-V-Col7a OX=866778 GN=HMPREF9684_0133 PE=4 SV=1	28	20909000	251480	13	13	11	13	2	13	2	11	2	23.7	23.7	20.4	59.457	43.771	49	0	49
1104	E1LBY2|E1LBY2	tr|E1LBY2|E1LBY2_9FIRM	tr|E1LBY2|E1LBY2_9FIRM Uncharacterized protein OS=Veillonella atypica ACS-134-V-Col7a OX=866778 GN=HMPREF9684_0468 PE=4 SV=1	13	20452000	601440	6	6	6	6	1	6	1	6	1	31.5	31.5	31.5	23.952	11.667	60	0	60
1105	D1BMA7|D1BMA7	tr|D1BMA7|D1BMA7_VEIPT	tr|D1BMA7|D1BMA7_VEIPT Glycerol-3-phosphate acyltransferase OS=Veillonella parvula (strain ATCC 10790 / DSM 2008 / CCUG 5123 / JCM 12972 / NCTC 11810 / Te3) OX=479436 GN=plsY PE=3 SV=1	6	18678000	23357000	3	3	2	1	2	1	2	0	1	12.6	12.6	8.6	21.29	3.2796	27	9	40
1106	E1LDI8|E1LDI8	tr|E1LDI8|E1LDI8_9FIRM	tr|E1LDI8|E1LDI8_9FIRM ABC transporter, ATP-binding protein OS=Veillonella atypica ACS-134-V-Col7a OX=866778 GN=HMPREF9684_1242 PE=3 SV=1	20	18415000	975590	7	5	5	6	1	5	0	5	0	9.5	5.9	5.9	56.584	6.527	12	0	13
1107	E1LA57|E1LA57	tr|E1LA57|E1LA57_9FIRM	tr|E1LA57|E1LA57_9FIRM Uncharacterized protein OS=Veillonella atypica ACS-134-V-Col7a OX=866778 GN=HMPREF9684_0190 PE=3 SV=1	20	18086000	4527100	5	5	4	5	1	5	1	4	0	14	14	11.4	50.117	19.564	7	1	9
1108	E1LA12|E1LA12	tr|E1LA12|E1LA12_9FIRM	tr|E1LA12|E1LA12_9FIRM Coproporphyrinogen III oxidase OS=Veillonella atypica ACS-134-V-Col7a OX=866778 GN=hemG PE=3 SV=1	34	18083000	304160	6	3	3	6	1	3	0	3	0	11.3	4.9	4.9	55.695	4.7393	7	0	7
1109	E1LA53|E1LA53	tr|E1LA53|E1LA53_9FIRM	tr|E1LA53|E1LA53_9FIRM UPF0145 protein HMPREF9684_0186 OS=Veillonella atypica ACS-134-V-Col7a OX=866778 GN=HMPREF9684_0186 PE=3 SV=1	7	17911000	9743800	5	2	2	4	2	2	0	2	0	42.9	20	20	11.267	3.5143	15	40	71
1110	E1L9P4|E1L9P4	tr|E1L9P4|E1L9P4_9FIRM	tr|E1L9P4|E1L9P4_9FIRM Ribonuclease P protein component OS=Veillonella atypica ACS-134-V-Col7a OX=866778 GN=rnpA PE=3 SV=1	8	17366000	2593300	3	3	2	2	1	2	1	2	0	19.1	19.1	13	13.753	2.7984	4	1	5
1111	E1LEA2|E1LEA2	tr|E1LEA2|E1LEA2_9FIRM	tr|E1LEA2|E1LEA2_9FIRM Putative phage prohead protease, HK97 family OS=Veillonella atypica ACS-134-V-Col7a OX=866778 GN=HMPREF9684_1168 PE=4 SV=1	67	16858000	535410	19	19	19	18	1	18	1	18	1	15.7	15.7	15.7	152.44	99.594	45	0	46
1112	E1L9E3|E1L9E3	tr|E1L9E3|E1L9E3_9FIRM	tr|E1L9E3|E1L9E3_9FIRM Uncharacterized protein OS=Veillonella atypica ACS-134-V-Col7a OX=866778 GN=HMPREF9684_0131 PE=4 SV=1	12	16419000	7166500	4	3	3	3	1	3	0	3	0	14.4	11.1	11.1	25.823	2.0466	4	8	13
1113	E1LBU3|E1LBU3	tr|E1LBU3|E1LBU3_9FIRM	tr|E1LBU3|E1LBU3_9FIRM 4-phosphoerythronate dehydrogenase OS=Veillonella atypica ACS-134-V-Col7a OX=866778 GN=pdxB PE=3 SV=1	13	16028000	3804100	3	2	2	1	1	1	0	1	0	9	7.2	7.2	37.02	3.0286	8	2	11
1114	E1LA73|E1LA73	tr|E1LA73|E1LA73_9FIRM	tr|E1LA73|E1LA73_9FIRM Glycosyltransferase, group 1 family protein OS=Veillonella atypica ACS-134-V-Col7a OX=866778 GN=HMPREF9684_0206 PE=4 SV=1	28	15612000	429190	8	8	8	8	1	8	1	8	1	21.4	21.4	21.4	44.504	71.057	55	1	56
1115	E1L9D5|E1L9D5	tr|E1L9D5|E1L9D5_9FIRM	tr|E1L9D5|E1L9D5_9FIRM POTRA domain protein, FtsQ-type OS=Veillonella atypica ACS-134-V-Col7a OX=866778 GN=ftsQ PE=4 SV=1	19	15605000	326280	6	6	6	5	1	5	1	5	1	24.2	24.2	24.2	35.647	101.57	11	1	12
1116	E1L9T4|E1L9T4	tr|E1L9T4|E1L9T4_9FIRM	tr|E1L9T4|E1L9T4_9FIRM ABC transporter, ATP-binding protein OS=Veillonella atypica ACS-134-V-Col7a OX=866778 GN=hisP PE=4 SV=1	15	15564000	8822100	7	7	5	7	2	7	2	5	0	25	25	16.7	28.208	37.234	42	8	50
1117	D1BR70|D1BR70	tr|D1BR70|D1BR70_VEIPT	tr|D1BR70|D1BR70_VEIPT NfeD domain-containing protein OS=Veillonella parvula (strain ATCC 10790 / DSM 2008 / CCUG 5123 / JCM 12972 / NCTC 11810 / Te3) OX=479436 GN=Vpar_0349 PE=4 SV=1	5	15510000	64357000	5	5	2	4	4	4	4	1	1	40.3	40.3	26	16.444	149.95	28	33	121
1118	E1LD85|E1LD85;D1BPC6|D1BPC6	tr|E1LD85|E1LD85_9FIRM	tr|E1LD85|E1LD85_9FIRM Helicase C-terminal domain protein OS=Veillonella atypica ACS-134-V-Col7a OX=866778 GN=HMPREF9684_0929 PE=4 SV=1	62	15195000	210310	19	19	19	18	1	18	1	18	1	21	21	21	111.73	45.024	53	0	54
1119	E1LA30|E1LA30	tr|E1LA30|E1LA30_9FIRM	tr|E1LA30|E1LA30_9FIRM Uncharacterized protein OS=Veillonella atypica ACS-134-V-Col7a OX=866778 GN=HMPREF9684_1848 PE=4 SV=1	17	14611000	9485800	8	5	5	7	4	5	1	5	1	30.2	19.6	19.6	30.402	39.842	9	9	19
1120	E1LE86|E1LE86	tr|E1LE86|E1LE86_9FIRM	tr|E1LE86|E1LE86_9FIRM 3-deoxy-manno-octulosonate cytidylyltransferase OS=Veillonella atypica ACS-134-V-Col7a OX=866778 GN=kdsB PE=3 SV=1	16	14536000	527090	8	6	6	8	2	6	0	6	0	35.8	28	28	27.408	14.361	24	4	28
1121	E1LE87|E1LE87	tr|E1LE87|E1LE87_9FIRM	tr|E1LE87|E1LE87_9FIRM Tetraacyldisaccharide 4-kinase OS=Veillonella atypica ACS-134-V-Col7a OX=866778 GN=lpxK PE=3 SV=1	20	14347000	4080800	9	8	8	9	1	8	0	8	0	24.9	22.7	22.7	40.378	24.966	29	2	31
1122	E1L9S0|E1L9S0	tr|E1L9S0|E1L9S0_9FIRM	tr|E1L9S0|E1L9S0_9FIRM Selenium-dependent molybdenum hydroxylase system protein, YqeB family OS=Veillonella atypica ACS-134-V-Col7a OX=866778 GN=HMPREF9684_0815 PE=4 SV=1	17	14183000	10759000	3	2	2	3	2	2	1	2	1	9.6	7	7	29.157	3.4835	5	1	6
1123	E1LD81|E1LD81	tr|E1LD81|E1LD81_9FIRM	tr|E1LD81|E1LD81_9FIRM ABC transporter, ATP-binding protein OS=Veillonella atypica ACS-134-V-Col7a OX=866778 GN=HMPREF9684_0925 PE=4 SV=1	14	14076000	4995200	6	6	1	5	2	5	2	1	0	28	28	3.7	30.68	17.898	9	7	17
1124	E1LDR7|E1LDR7	tr|E1LDR7|E1LDR7_9FIRM	tr|E1LDR7|E1LDR7_9FIRM Methyltransferase domain protein OS=Veillonella atypica ACS-134-V-Col7a OX=866778 GN=HMPREF9684_0132 PE=4 SV=1	31	13755000	918130	11	9	8	11	2	9	2	8	1	20.2	17.1	16	63.476	52.539	44	2	46
1125	E1LC62|E1LC62	tr|E1LC62|E1LC62_9FIRM	tr|E1LC62|E1LC62_9FIRM Uncharacterized protein OS=Veillonella atypica ACS-134-V-Col7a OX=866778 GN=HMPREF9684_1943 PE=4 SV=1	31	13744000	2189300	2	1	1	2	1	1	0	1	0	3.5	2.1	2.1	58.804	9.7494	8	7	15
1126	E1LCY4|E1LCY4	tr|E1LCY4|E1LCY4_9FIRM	tr|E1LCY4|E1LCY4_9FIRM Dolichyl-phosphate-mannose-protein mannosyltransferase OS=Veillonella atypica ACS-134-V-Col7a OX=866778 GN=HMPREF9684_0316 PE=4 SV=1	17	13650000	885010	3	3	3	3	1	3	1	3	1	5.7	5.7	5.7	61.915	7.9029	23	0	23
1127	E1LA22|E1LA22	tr|E1LA22|E1LA22_9FIRM	tr|E1LA22|E1LA22_9FIRM Efflux transporter, RND family, MFP subunit OS=Veillonella atypica ACS-134-V-Col7a OX=866778 GN=HMPREF9684_1630 PE=3 SV=1	13	13614000	580060	2	2	2	2	1	2	1	2	1	4.8	4.8	4.8	39.186	2.4938	3	0	3
1128	D1BQN8|D1BQN8;E1LDV3|E1LDV3	tr|D1BQN8|D1BQN8_VEIPT;tr|E1LDV3|E1LDV3_9FIRM	tr|D1BQN8|D1BQN8_VEIPT Tryptophan synthase alpha chain OS=Veillonella parvula (strain ATCC 10790 / DSM 2008 / CCUG 5123 / JCM 12972 / NCTC 11810 / Te3) OX=479436 GN=trpA PE=3 SV=1;tr|E1LDV3|E1LDV3_9FIRM Tryptophan synthase alpha chain OS=Veillonella atypic	15	13086000	5129700	3	3	3	1	3	1	3	1	3	10.6	10.6	10.6	28.468	2.2646	0	5	6
1129	D1BN48|D1BN48	tr|D1BN48|D1BN48_VEIPT	tr|D1BN48|D1BN48_VEIPT Peptidase M16C associated domain protein OS=Veillonella parvula (strain ATCC 10790 / DSM 2008 / CCUG 5123 / JCM 12972 / NCTC 11810 / Te3) OX=479436 GN=Vpar_1124 PE=4 SV=1	58	12583000	18599000	8	8	5	4	2	4	2	1	1	7.9	7.9	5.3	109.74	5.3005	6	1	14
1130	D1BML1|D1BML1	tr|D1BML1|D1BML1_VEIPT	tr|D1BML1|D1BML1_VEIPT VanW family protein OS=Veillonella parvula (strain ATCC 10790 / DSM 2008 / CCUG 5123 / JCM 12972 / NCTC 11810 / Te3) OX=479436 GN=Vpar_0937 PE=4 SV=1	23	12159000	2423100	5	5	5	1	4	1	4	1	4	10.9	10.9	10.9	49.749	15.442	0	4	8
1131	E1LBD4|E1LBD4	tr|E1LBD4|E1LBD4_9FIRM	tr|E1LBD4|E1LBD4_9FIRM Transporter, major facilitator family protein OS=Veillonella atypica ACS-134-V-Col7a OX=866778 GN=HMPREF9684_1405 PE=4 SV=1	16	11905000	1190500	2	1	1	2	1	1	1	1	1	4.1	2.2	2.2	45.413	1.9742	6	0	6
1132	E1LCP4|E1LCP4	tr|E1LCP4|E1LCP4_9FIRM	tr|E1LCP4|E1LCP4_9FIRM Uncharacterized protein OS=Veillonella atypica ACS-134-V-Col7a OX=866778 GN=HMPREF9684_1831 PE=4 SV=1	16	11851000	637540	3	3	3	3	1	3	1	3	1	16.5	16.5	16.5	26.995	9.4173	6	0	6
1133	E1LEF6|E1LEF6	tr|E1LEF6|E1LEF6_9FIRM	tr|E1LEF6|E1LEF6_9FIRM PTS system, Lactose/Cellobiose specific IIB subunit OS=Veillonella atypica ACS-134-V-Col7a OX=866778 GN=HMPREF9684_0114 PE=4 SV=1	7	11752000	35445000	5	5	4	3	2	3	2	3	1	31.9	31.9	23.1	10.196	2.4078	4	2	6
1134	E1LAC0|E1LAC0	tr|E1LAC0|E1LAC0_9FIRM	tr|E1LAC0|E1LAC0_9FIRM Adenosylcobinamide-GDP ribazoletransferase OS=Veillonella atypica ACS-134-V-Col7a OX=866778 GN=cobS PE=3 SV=1	8	11464000	4099800	3	3	2	3	1	3	1	2	0	9.5	9.5	7.5	33.008	10.529	8	0	10
1135	D1BQD0|D1BQD0	tr|D1BQD0|D1BQD0_VEIPT	tr|D1BQD0|D1BQD0_VEIPT Uncharacterized protein OS=Veillonella parvula (strain ATCC 10790 / DSM 2008 / CCUG 5123 / JCM 12972 / NCTC 11810 / Te3) OX=479436 GN=Vpar_0054 PE=4 SV=1	12	11083000	20632000	5	4	4	1	2	0	1	0	1	18.9	15.7	15.7	28.158	11.541	88	3	102
1136	E1LCS7|E1LCS7	tr|E1LCS7|E1LCS7_9FIRM	tr|E1LCS7|E1LCS7_9FIRM Hydrogenase expression/formation protein HypD OS=Veillonella atypica ACS-134-V-Col7a OX=866778 GN=hypD PE=3 SV=1	23	10750000	74007000	6	6	5	5	3	5	3	4	2	14.2	14.2	12.3	40.032	6.0479	12	1	14
1137	D1BNE2|D1BNE2	tr|D1BNE2|D1BNE2_VEIPT	tr|D1BNE2|D1BNE2_VEIPT Ribonuclease, Rne/Rng family OS=Veillonella parvula (strain ATCC 10790 / DSM 2008 / CCUG 5123 / JCM 12972 / NCTC 11810 / Te3) OX=479436 GN=Vpar_1219 PE=4 SV=1	31	10570000	229510	7	7	1	3	2	3	2	0	1	15.8	15.8	1.5	53.513	4.5701	3	2	11
1138	D1BMQ5|D1BMQ5	tr|D1BMQ5|D1BMQ5_VEIPT	tr|D1BMQ5|D1BMQ5_VEIPT Peptidase M20 domain-containing protein 2 OS=Veillonella parvula (strain ATCC 10790 / DSM 2008 / CCUG 5123 / JCM 12972 / NCTC 11810 / Te3) OX=479436 GN=Vpar_0981 PE=3 SV=1	17	10422000	6087600	5	5	5	1	3	1	3	1	3	11.2	11.2	11.2	47.966	4.4737	0	2	8
1139	E1LDN2|E1LDN2	tr|E1LDN2|E1LDN2_9FIRM	tr|E1LDN2|E1LDN2_9FIRM Carbonate dehydratase OS=Veillonella atypica ACS-134-V-Col7a OX=866778 GN=cah PE=3 SV=1	11	10184000	1069400	4	4	4	4	1	4	1	4	1	17.1	17.1	17.1	20.414	2.9919	5	0	5
1140	D1BQ35|D1BQ35	tr|D1BQ35|D1BQ35_VEIPT	tr|D1BQ35|D1BQ35_VEIPT Uncharacterized protein OS=Veillonella parvula (strain ATCC 10790 / DSM 2008 / CCUG 5123 / JCM 12972 / NCTC 11810 / Te3) OX=479436 GN=Vpar_1817 PE=4 SV=1	29	10018000	11159000	8	8	7	2	8	2	8	1	7	14.3	14.3	12.9	59.857	14.916	9	24	33
1141	E1LBY3|E1LBY3	tr|E1LBY3|E1LBY3_9FIRM	tr|E1LBY3|E1LBY3_9FIRM dTTP/UTP pyrophosphatase OS=Veillonella atypica ACS-134-V-Col7a OX=866778 GN=maf PE=3 SV=1	9	9638200	21067000	2	2	2	2	2	2	2	2	2	10.6	10.6	10.6	20.606	3.3555	4	2	6
1142	E1LBX8|E1LBX8	tr|E1LBX8|E1LBX8_9FIRM	tr|E1LBX8|E1LBX8_9FIRM Bifunctional protein PyrR OS=Veillonella atypica ACS-134-V-Col7a OX=866778 GN=pyrR PE=3 SV=1	12	9535300	4067300	4	4	3	3	1	3	1	2	0	19.7	19.7	15	19.447	7.7976	9	5	17
1143	E1L996|E1L996	tr|E1L996|E1L996_9FIRM	tr|E1L996|E1L996_9FIRM Efflux transporter, RND family, MFP subunit OS=Veillonella atypica ACS-134-V-Col7a OX=866778 GN=HMPREF9684_0629 PE=3 SV=1	15	9210700	18147000	5	3	3	3	3	2	1	2	1	19.4	13.9	13.9	38.458	6.3092	11	11	34
1144	D1BMI2|D1BMI2	tr|D1BMI2|D1BMI2_VEIPT	tr|D1BMI2|D1BMI2_VEIPT Adenosylcobinamide-GDP ribazoletransferase OS=Veillonella parvula (strain ATCC 10790 / DSM 2008 / CCUG 5123 / JCM 12972 / NCTC 11810 / Te3) OX=479436 GN=cobS PE=3 SV=1	7	9152400	11348000	3	2	2	1	2	0	1	0	1	11.4	9.4	9.4	32.917	3.4724	0	1	7
1145	E1L9H8|E1L9H8	tr|E1L9H8|E1L9H8_9FIRM	tr|E1L9H8|E1L9H8_9FIRM LysR substrate binding domain protein OS=Veillonella atypica ACS-134-V-Col7a OX=866778 GN=lysR_2 PE=3 SV=1	21	8823000	1133200	6	4	4	5	2	4	0	4	0	19.5	14.2	14.2	34.639	3.8389	8	2	14
1146	E1LBK2|E1LBK2	tr|E1LBK2|E1LBK2_9FIRM	tr|E1LBK2|E1LBK2_9FIRM Uncharacterized protein OS=Veillonella atypica ACS-134-V-Col7a OX=866778 GN=HMPREF9684_0001 PE=4 SV=1	14	8568400	3621200	3	2	2	2	1	2	0	2	0	14.2	10.5	10.5	24.141	2.6659	2	5	7
1147	D1BLL7|D1BLL7;E1LE37|E1LE37	tr|D1BLL7|D1BLL7_VEIPT	tr|D1BLL7|D1BLL7_VEIPT Holliday junction ATP-dependent DNA helicase RuvA OS=Veillonella parvula (strain ATCC 10790 / DSM 2008 / CCUG 5123 / JCM 12972 / NCTC 11810 / Te3) OX=479436 GN=ruvA PE=3 SV=1	13	8476400	3950800	3	3	3	1	1	1	1	1	1	14.4	14.4	14.4	21.969	3.2768	2	1	9
1148	D1BPH3|D1BPH3	tr|D1BPH3|D1BPH3_VEIPT	tr|D1BPH3|D1BPH3_VEIPT Iron-containing alcohol dehydrogenase OS=Veillonella parvula (strain ATCC 10790 / DSM 2008 / CCUG 5123 / JCM 12972 / NCTC 11810 / Te3) OX=479436 GN=Vpar_1604 PE=4 SV=1	16	8443800	17687000	5	5	3	2	4	2	4	0	3	10.3	10.3	6.7	41.806	10.285	5	10	19
1149	D1BL42|D1BL42	tr|D1BL42|D1BL42_VEIPT	tr|D1BL42|D1BL42_VEIPT UPF0597 protein Vpar_0415 OS=Veillonella parvula (strain ATCC 10790 / DSM 2008 / CCUG 5123 / JCM 12972 / NCTC 11810 / Te3) OX=479436 GN=Vpar_0415 PE=3 SV=1	21	8195900	12992000	6	3	3	2	5	0	3	0	3	14.2	6.7	6.7	44.059	7.2725	1	11	13
1150	E1LAJ6|E1LAJ6	tr|E1LAJ6|E1LAJ6_9FIRM	tr|E1LAJ6|E1LAJ6_9FIRM VanW-like protein OS=Veillonella atypica ACS-134-V-Col7a OX=866778 GN=vanW PE=4 SV=1	26	7494400	1813100	5	5	5	4	2	4	2	4	2	13.3	13.3	13.3	49.8	14.105	12	1	14
1151	E1LAZ9|E1LAZ9	tr|E1LAZ9|E1LAZ9_9FIRM	tr|E1LAZ9|E1LAZ9_9FIRM ABC transporter, substrate-binding protein, family 5 OS=Veillonella atypica ACS-134-V-Col7a OX=866778 GN=HMPREF9684_1538 PE=3 SV=1	30	7450200	18603000	6	3	3	4	1	1	0	1	0	13.5	7.7	7.7	55.39	9.9363	55	0	65
1152	E1LB70|E1LB70	tr|E1LB70|E1LB70_9FIRM	tr|E1LB70|E1LB70_9FIRM Uncharacterized protein OS=Veillonella atypica ACS-134-V-Col7a OX=866778 GN=HMPREF9684_1442 PE=4 SV=1	19	7447700	4556500	5	3	3	3	2	3	0	3	0	13.7	9.3	9.3	35.416	2.1158	5	2	7
1153	E1LCV9|E1LCV9	tr|E1LCV9|E1LCV9_9FIRM	tr|E1LCV9|E1LCV9_9FIRM DNA helicase OS=Veillonella atypica ACS-134-V-Col7a OX=866778 GN=addA PE=4 SV=1	83	7229400	1715900	15	11	11	14	3	11	1	11	1	10.4	8.2	8.2	143.55	11.667	14	2	17
1154	E1LAG8|E1LAG8	tr|E1LAG8|E1LAG8_9FIRM	tr|E1LAG8|E1LAG8_9FIRM tRNA-dihydrouridine synthase OS=Veillonella atypica ACS-134-V-Col7a OX=866778 GN=HMPREF9684_1923 PE=3 SV=1	26	7120200	644320	4	4	4	4	1	4	1	4	1	12.4	12.4	12.4	36.608	3.8264	9	0	9
1155	E1LB82|E1LB82	tr|E1LB82|E1LB82_9FIRM	tr|E1LB82|E1LB82_9FIRM DNA polymerase III, epsilon subunit OS=Veillonella atypica ACS-134-V-Col7a OX=866778 GN=HMPREF9684_1454 PE=4 SV=1	17	7094200	717190	4	4	2	3	1	3	1	2	1	15.3	15.3	7.2	23.782	2.8813	6	0	7
1156	E1LE33|E1LE33	tr|E1LE33|E1LE33_9FIRM	tr|E1LE33|E1LE33_9FIRM Queuine tRNA-ribosyltransferase OS=Veillonella atypica ACS-134-V-Col7a OX=866778 GN=tgt PE=3 SV=1	20	6915400	878870	4	4	1	4	2	4	2	1	0	11.6	11.6	3.2	42.275	7.8186	19	2	25
1157	D1BLQ1|D1BLQ1;E1LCQ8|E1LCQ8	tr|D1BLQ1|D1BLQ1_VEIPT	tr|D1BLQ1|D1BLQ1_VEIPT Ribonuclease M5 OS=Veillonella parvula (strain ATCC 10790 / DSM 2008 / CCUG 5123 / JCM 12972 / NCTC 11810 / Te3) OX=479436 GN=rnmV PE=3 SV=1	12	6805300	2262500	3	3	3	1	2	1	2	1	2	20	20	20	19.362	2.4581	1	4	6
1158	E1L9N4|E1L9N4	tr|E1L9N4|E1L9N4_9FIRM	tr|E1L9N4|E1L9N4_9FIRM Uncharacterized protein OS=Veillonella atypica ACS-134-V-Col7a OX=866778 GN=HMPREF9684_1212 PE=4 SV=1	13	6385000	10529000	3	3	3	3	1	3	1	3	1	9.1	9.1	9.1	30.079	3.1061	5	0	5
1159	D1BMQ0|D1BMQ0	tr|D1BMQ0|D1BMQ0_VEIPT	tr|D1BMQ0|D1BMQ0_VEIPT Glycine--tRNA ligase beta subunit OS=Veillonella parvula (strain ATCC 10790 / DSM 2008 / CCUG 5123 / JCM 12972 / NCTC 11810 / Te3) OX=479436 GN=glyS PE=3 SV=1	41	6329800	1630700	6	3	3	3	4	2	3	2	3	9.8	5	5	75.517	7.543	4	4	16
1160	E1LD95|E1LD95;D1BM72|D1BM72	tr|E1LD95|E1LD95_9FIRM;tr|D1BM72|D1BM72_VEIPT	tr|E1LD95|E1LD95_9FIRM Cold-shock DNA-binding domain protein OS=Veillonella atypica ACS-134-V-Col7a OX=866778 GN=cspB PE=4 SV=1;tr|D1BM72|D1BM72_VEIPT Cold-shock DNA-binding domain protein OS=Veillonella parvula (strain ATCC 10790 / DSM 2008 / CCUG 5123 /	5	6282500	13775000	1	1	1	1	1	1	1	1	1	13.8	13.8	13.8	7.1248	1.781	1	1	3
1161	E1LBH7|E1LBH7	tr|E1LBH7|E1LBH7_9FIRM	tr|E1LBH7|E1LBH7_9FIRM Glutamyl-tRNA reductase OS=Veillonella atypica ACS-134-V-Col7a OX=866778 GN=hemA PE=3 SV=1	27	6033000	425250	5	2	2	3	3	1	0	1	0	9.7	4.2	4.2	47.765	4.9013	6	3	10
1162	E1LCZ6|E1LCZ6	tr|E1LCZ6|E1LCZ6_9FIRM	tr|E1LCZ6|E1LCZ6_9FIRM Uncharacterized protein OS=Veillonella atypica ACS-134-V-Col7a OX=866778 GN=HMPREF9684_0328 PE=4 SV=1	20	5797600	23547000	7	2	2	4	4	2	0	2	0	29.9	12.5	12.5	30.036	21.481	5	18	34
1163	D1BN86|D1BN86	tr|D1BN86|D1BN86_VEIPT	tr|D1BN86|D1BN86_VEIPT Uncharacterized protein OS=Veillonella parvula (strain ATCC 10790 / DSM 2008 / CCUG 5123 / JCM 12972 / NCTC 11810 / Te3) OX=479436 GN=Vpar_1162 PE=4 SV=1	30	5528900	8906700	7	7	7	1	7	1	7	1	7	14.7	14.7	14.7	50.678	30.504	0	8	9
1164	D1BQ30|D1BQ30	tr|D1BQ30|D1BQ30_VEIPT	tr|D1BQ30|D1BQ30_VEIPT Uncharacterized protein OS=Veillonella parvula (strain ATCC 10790 / DSM 2008 / CCUG 5123 / JCM 12972 / NCTC 11810 / Te3) OX=479436 GN=Vpar_1812 PE=4 SV=1	35	5521500	45646000	23	23	23	3	22	3	22	3	22	39.3	39.3	39.3	75.459	142.62	10	158	168
1165	E1LCQ2|E1LCQ2	tr|E1LCQ2|E1LCQ2_9FIRM	tr|E1LCQ2|E1LCQ2_9FIRM tRNA pseudouridine synthase B OS=Veillonella atypica ACS-134-V-Col7a OX=866778 GN=truB PE=3 SV=1	19	5365200	12361000	6	6	4	5	2	5	2	3	1	18	18	13.8	34.368	5.3155	19	2	21
1166	D1BQQ3|D1BQQ3	tr|D1BQQ3|D1BQQ3_VEIPT	tr|D1BQQ3|D1BQQ3_VEIPT Cof-like hydrolase OS=Veillonella parvula (strain ATCC 10790 / DSM 2008 / CCUG 5123 / JCM 12972 / NCTC 11810 / Te3) OX=479436 GN=Vpar_0178 PE=4 SV=1	28	5355600	2401400	3	3	2	1	1	1	1	1	1	7.6	7.6	5.7	42.881	2.4894	3	2	7
1167	D1BL43|D1BL43	tr|D1BL43|D1BL43_VEIPT	tr|D1BL43|D1BL43_VEIPT Major facilitator superfamily MFS_1 OS=Veillonella parvula (strain ATCC 10790 / DSM 2008 / CCUG 5123 / JCM 12972 / NCTC 11810 / Te3) OX=479436 GN=Vpar_0416 PE=4 SV=1	5	5286700	6241200	2	2	2	1	1	1	1	1	1	8.4	8.4	8.4	42.1	2.2033	0	0	1
1168	D1BQD3|D1BQD3;E1LB34|E1LB34	tr|D1BQD3|D1BQD3_VEIPT	tr|D1BQD3|D1BQD3_VEIPT Peptidase M48 Ste24p OS=Veillonella parvula (strain ATCC 10790 / DSM 2008 / CCUG 5123 / JCM 12972 / NCTC 11810 / Te3) OX=479436 GN=Vpar_0057 PE=3 SV=1	15	5144700	14403000	7	7	7	3	6	3	6	3	6	17.9	17.9	17.9	41.392	61.716	2	6	8
1169	D1BPK4|D1BPK4	tr|D1BPK4|D1BPK4_VEIPT	tr|D1BPK4|D1BPK4_VEIPT Nucleoid-associated protein Vpar_1635 OS=Veillonella parvula (strain ATCC 10790 / DSM 2008 / CCUG 5123 / JCM 12972 / NCTC 11810 / Te3) OX=479436 GN=Vpar_1635 PE=3 SV=1	8	5076200	21513000	3	1	1	1	3	0	1	0	1	26.6	10.1	10.1	11.707	2.498	1	11	17
1170	E1LA08|E1LA08	tr|E1LA08|E1LA08_9FIRM	tr|E1LA08|E1LA08_9FIRM Nucleoid-associated protein HMPREF9684_1615 OS=Veillonella atypica ACS-134-V-Col7a OX=866778 GN=HMPREF9684_1615 PE=3 SV=1	8	5076200	6318300	4	4	2	3	2	3	2	2	0	32.1	32.1	15.6	11.697	4.2869	3	6	9
1171	D1BP85|D1BP85;E1LAL3|E1LAL3	tr|D1BP85|D1BP85_VEIPT	tr|D1BP85|D1BP85_VEIPT Uncharacterized protein OS=Veillonella parvula (strain ATCC 10790 / DSM 2008 / CCUG 5123 / JCM 12972 / NCTC 11810 / Te3) OX=479436 GN=Vpar_1516 PE=4 SV=1	23	5020800	277600000	12	12	12	2	12	2	12	2	12	33.8	33.8	33.8	52.469	252.93	0	57	58
1172	E1LAR8|E1LAR8	tr|E1LAR8|E1LAR8_9FIRM	tr|E1LAR8|E1LAR8_9FIRM PhoH family protein OS=Veillonella atypica ACS-134-V-Col7a OX=866778 GN=HMPREF9684_0254 PE=4 SV=1	24	4896100	2631400	5	2	2	4	2	2	0	2	0	14.9	5.6	5.6	36.355	3.189	4	2	10
1173	E1L971|E1L971	tr|E1L971|E1L971_9FIRM	tr|E1L971|E1L971_9FIRM Ferrichrome ABC transporter, ATP-binding protein FhuC OS=Veillonella atypica ACS-134-V-Col7a OX=866778 GN=fhuC PE=4 SV=1	17	4786600	351140	6	4	4	6	2	4	0	4	0	26.5	16.9	16.9	29.504	4.2433	11	2	14
1174	D1BNZ9|D1BNZ9	tr|D1BNZ9|D1BNZ9_VEIPT	tr|D1BNZ9|D1BNZ9_VEIPT Pyrroline-5-carboxylate reductase OS=Veillonella parvula (strain ATCC 10790 / DSM 2008 / CCUG 5123 / JCM 12972 / NCTC 11810 / Te3) OX=479436 GN=proC PE=3 SV=1	13	4563200	5838400	6	6	3	3	4	3	4	0	3	28	28	11.7	27.075	21.6	6	6	12
1175	D1BPL8|D1BPL8	tr|D1BPL8|D1BPL8_VEIPT	tr|D1BPL8|D1BPL8_VEIPT Sodium:dicarboxylate symporter OS=Veillonella parvula (strain ATCC 10790 / DSM 2008 / CCUG 5123 / JCM 12972 / NCTC 11810 / Te3) OX=479436 GN=Vpar_1649 PE=3 SV=1	9	4541300	1539700	3	3	1	1	1	1	1	0	0	8	8	2.6	48.833	5.6523	4	2	43
1176	E1LA36|E1LA36	tr|E1LA36|E1LA36_9FIRM	tr|E1LA36|E1LA36_9FIRM Transporter, dicarboxylate/amino acid:cation Na+/H+ symporter family protein OS=Veillonella atypica ACS-134-V-Col7a OX=866778 GN=HMPREF9684_1854 PE=3 SV=1	9	4541300	1539700	3	1	1	1	1	0	0	0	0	8	2.6	2.6	48.733	-2	4	2	44
1177	D1BN68|D1BN68;E1L978|E1L978	tr|D1BN68|D1BN68_VEIPT;tr|E1L978|E1L978_9FIRM	tr|D1BN68|D1BN68_VEIPT Precorrin-6Y C5,15-methyltransferase (Decarboxylating), CbiT subunit OS=Veillonella parvula (strain ATCC 10790 / DSM 2008 / CCUG 5123 / JCM 12972 / NCTC 11810 / Te3) OX=479436 GN=Vpar_1144 PE=4 SV=1;tr|E1L978|E1L978_9FIRM Precorrin-6	12	4539100	10279000	5	5	5	1	5	1	5	1	5	21.5	21.5	21.5	21.396	13.926	0	12	13
1178	E1LAS0|E1LAS0	tr|E1LAS0|E1LAS0_9FIRM	tr|E1LAS0|E1LAS0_9FIRM B12 binding domain protein OS=Veillonella atypica ACS-134-V-Col7a OX=866778 GN=HMPREF9684_0256 PE=4 SV=1	27	4400300	152590	5	5	1	3	1	3	1	1	0	9.8	9.8	4	67.219	8.9541	6	0	8
1179	E1LAH5|E1LAH5	tr|E1LAH5|E1LAH5_9FIRM	tr|E1LAH5|E1LAH5_9FIRM Probable transaldolase OS=Veillonella atypica ACS-134-V-Col7a OX=866778 GN=fsa PE=3 SV=1	12	4303800	2722600	4	4	4	3	1	3	1	3	1	15.9	15.9	15.9	23.017	2.2853	3	2	6
1180	D1BLB0|D1BLB0	tr|D1BLB0|D1BLB0_VEIPT	tr|D1BLB0|D1BLB0_VEIPT Binding-protein-dependent transport systems inner membrane component OS=Veillonella parvula (strain ATCC 10790 / DSM 2008 / CCUG 5123 / JCM 12972 / NCTC 11810 / Te3) OX=479436 GN=Vpar_0484 PE=3 SV=1	8	4187100	1907600	3	3	2	1	2	1	2	0	1	13.2	13.2	9	33.712	71.686	6	0	29
1181	E1LEG0|E1LEG0	tr|E1LEG0|E1LEG0_9FIRM	tr|E1LEG0|E1LEG0_9FIRM ABC transporter, ATP-binding protein OS=Veillonella atypica ACS-134-V-Col7a OX=866778 GN=HMPREF9684_0118 PE=4 SV=1	33	4020200	1422200	5	2	2	3	3	2	1	2	1	8.4	3.8	3.8	74.469	5.6552	4	3	7
1182	E1LAN2|E1LAN2;D1BMM5|D1BMM5	tr|E1LAN2|E1LAN2_9FIRM;tr|D1BMM5|D1BMM5_VEIPT	tr|E1LAN2|E1LAN2_9FIRM 6,7-dimethyl-8-ribityllumazine synthase OS=Veillonella atypica ACS-134-V-Col7a OX=866778 GN=ribH PE=3 SV=1;tr|D1BMM5|D1BMM5_VEIPT 6,7-dimethyl-8-ribityllumazine synthase OS=Veillonella parvula (strain ATCC 10790 / DSM 2008 / CCUG 512	10	3898700	1118800	2	2	2	1	2	1	2	1	2	9.8	9.8	9.8	16.419	1.8146	7	3	14
1183	D1BQT8|D1BQT8	tr|D1BQT8|D1BQT8_VEIPT	tr|D1BQT8|D1BQT8_VEIPT Metallophosphoesterase OS=Veillonella parvula (strain ATCC 10790 / DSM 2008 / CCUG 5123 / JCM 12972 / NCTC 11810 / Te3) OX=479436 GN=Vpar_0214 PE=4 SV=1	20	3880100	4303700	5	5	5	1	5	1	5	1	5	14.7	14.7	14.7	47.815	6.6793	0	7	7
1184	E1L9L3|E1L9L3	tr|E1L9L3|E1L9L3_9FIRM	tr|E1L9L3|E1L9L3_9FIRM 16S rRNA (cytosine(967)-C(5))-methyltransferase OS=Veillonella atypica ACS-134-V-Col7a OX=866778 GN=sun PE=3 SV=1	28	3550600	5114700	5	3	3	3	2	2	1	2	1	10	4.9	4.9	51.332	2.2988	3	2	6
1185	D1BMC1|D1BMC1	tr|D1BMC1|D1BMC1_VEIPT	tr|D1BMC1|D1BMC1_VEIPT Peptide deformylase OS=Veillonella parvula (strain ATCC 10790 / DSM 2008 / CCUG 5123 / JCM 12972 / NCTC 11810 / Te3) OX=479436 GN=def PE=3 SV=1	9	3494700	64575000	5	5	5	1	5	1	5	1	5	30.2	30.2	30.2	17.728	9.1686	1	12	15
1186	D1BLC8|D1BLC8	tr|D1BLC8|D1BLC8_VEIPT	tr|D1BLC8|D1BLC8_VEIPT tRNA(Ile)-lysidine synthase OS=Veillonella parvula (strain ATCC 10790 / DSM 2008 / CCUG 5123 / JCM 12972 / NCTC 11810 / Te3) OX=479436 GN=tilS PE=3 SV=1	19	3421700	1806300	5	5	5	2	3	2	3	2	3	18.7	18.7	18.7	37.737	32.039	3	4	7
1187	E1L9U4|E1L9U4	tr|E1L9U4|E1L9U4_9FIRM	tr|E1L9U4|E1L9U4_9FIRM Phosphomethylpyrimidine kinase OS=Veillonella atypica ACS-134-V-Col7a OX=866778 GN=thiD PE=3 SV=1	12	3394300	3817800	2	1	1	2	1	1	0	1	0	7.9	4.3	4.3	30.109	3.2712	6	5	11
1188	E1L9R0|E1L9R0;D1BQ60|D1BQ60	tr|E1L9R0|E1L9R0_9FIRM	tr|E1L9R0|E1L9R0_9FIRM Putative cob(I)yrinic acid a,c-diamide adenosyltransferase OS=Veillonella atypica ACS-134-V-Col7a OX=866778 GN=HMPREF9684_1523 PE=4 SV=1	14	3290800	600090	3	3	3	3	1	3	1	3	1	14.1	14.1	14.1	21.508	3.8058	9	0	10
1189	E1LB18|E1LB18	tr|E1LB18|E1LB18_9FIRM	tr|E1LB18|E1LB18_9FIRM VWFA domain-containing protein OS=Veillonella atypica ACS-134-V-Col7a OX=866778 GN=HMPREF9684_1557 PE=3 SV=1	32	3260800	1295100	5	5	4	5	2	5	2	4	2	6.9	6.9	5.9	75.268	6.2845	8	6	24
1190	E1L9G6|E1L9G6	tr|E1L9G6|E1L9G6_9FIRM	tr|E1L9G6|E1L9G6_9FIRM Uncharacterized protein OS=Veillonella atypica ACS-134-V-Col7a OX=866778 GN=HMPREF9684_0772 PE=4 SV=1	10	3186900	7233300	3	2	2	3	1	2	0	2	0	18.7	14.4	14.4	15.817	2.4469	3	1	5
1191	D1BL81|D1BL81	tr|D1BL81|D1BL81_VEIPT	tr|D1BL81|D1BL81_VEIPT Phosphomethylpyrimidine synthase OS=Veillonella parvula (strain ATCC 10790 / DSM 2008 / CCUG 5123 / JCM 12972 / NCTC 11810 / Te3) OX=479436 GN=thiC PE=3 SV=1	24	3139700	5961100	7	7	5	2	6	2	6	1	4	13.6	13.6	8.8	47.885	9.9135	1	10	12
1192	E1LDV2|E1LDV2	tr|E1LDV2|E1LDV2_9FIRM	tr|E1LDV2|E1LDV2_9FIRM Uncharacterized protein OS=Veillonella atypica ACS-134-V-Col7a OX=866778 GN=HMPREF9684_0056 PE=4 SV=1	16	3128200	4786300	3	3	3	2	1	2	1	2	1	8.3	8.3	8.3	37.622	5.206	3	1	6
1193	D1BQ80|D1BQ80;E1L9N9|E1L9N9	tr|D1BQ80|D1BQ80_VEIPT;tr|E1L9N9|E1L9N9_9FIRM	tr|D1BQ80|D1BQ80_VEIPT DNA replication and repair protein RecF OS=Veillonella parvula (strain ATCC 10790 / DSM 2008 / CCUG 5123 / JCM 12972 / NCTC 11810 / Te3) OX=479436 GN=recF PE=3 SV=1;tr|E1L9N9|E1L9N9_9FIRM DNA replication and repair protein RecF OS=Ve	21	2969100	2130000	4	4	4	1	3	1	3	1	3	8.5	8.5	8.5	42.169	2.5666	1	3	4
1194	E1LBF0|E1LBF0	tr|E1LBF0|E1LBF0_9FIRM	tr|E1LBF0|E1LBF0_9FIRM Bifunctional purine biosynthesis protein PurH OS=Veillonella atypica ACS-134-V-Col7a OX=866778 GN=purH PE=3 SV=1	28	2844800	4810900	2	2	1	2	1	2	1	1	0	3.9	3.9	1.8	54.879	3.8633	1	2	3
1195	D1BR32|D1BR32	tr|D1BR32|D1BR32_VEIPT	tr|D1BR32|D1BR32_VEIPT ABC transporter related protein OS=Veillonella parvula (strain ATCC 10790 / DSM 2008 / CCUG 5123 / JCM 12972 / NCTC 11810 / Te3) OX=479436 GN=Vpar_0311 PE=4 SV=1	13	2832800	12693000	3	3	3	1	3	1	3	1	3	20.6	20.6	20.6	23.243	5.7025	0	6	9
1196	E1LCV4|E1LCV4	tr|E1LCV4|E1LCV4_9FIRM	tr|E1LCV4|E1LCV4_9FIRM Molybdopterin molybdenumtransferase OS=Veillonella atypica ACS-134-V-Col7a OX=866778 GN=HMPREF9684_0728 PE=3 SV=1	21	2711900	5163700	6	6	3	3	3	3	3	2	0	15.4	15.4	8.3	34.85	7.1421	2	9	17
1197	E1LDN1|E1LDN1	tr|E1LDN1|E1LDN1_9FIRM	tr|E1LDN1|E1LDN1_9FIRM ATP-dependent dethiobiotin synthetase BioD OS=Veillonella atypica ACS-134-V-Col7a OX=866778 GN=bioD PE=3 SV=1	16	2655500	535170	5	3	3	3	1	2	0	2	0	17.2	8.8	8.8	27.147	1.8859	2	0	6
1198	D1BQU2|D1BQU2	tr|D1BQU2|D1BQU2_VEIPT	tr|D1BQU2|D1BQU2_VEIPT Coproporphyrinogen III oxidase OS=Veillonella parvula (strain ATCC 10790 / DSM 2008 / CCUG 5123 / JCM 12972 / NCTC 11810 / Te3) OX=479436 GN=Vpar_0218 PE=3 SV=1	33	2639900	2412700	7	7	4	3	5	3	5	0	4	13.8	13.8	7.8	58.661	20.68	3	4	7
1199	D1BN78|D1BN78	tr|D1BN78|D1BN78_VEIPT	tr|D1BN78|D1BN78_VEIPT Amino acid permease-associated region OS=Veillonella parvula (strain ATCC 10790 / DSM 2008 / CCUG 5123 / JCM 12972 / NCTC 11810 / Te3) OX=479436 GN=Vpar_1154 PE=4 SV=1	7	2633500	5794100	2	1	1	1	1	0	1	0	1	6	3.9	3.9	46.647	2.1159	2	1	3
1200	E1L9I0|E1L9I0	tr|E1L9I0|E1L9I0_9FIRM	tr|E1L9I0|E1L9I0_9FIRM DNA polymerase III subunit alpha OS=Veillonella atypica ACS-134-V-Col7a OX=866778 GN=HMPREF9684_0786 PE=3 SV=1	65	2629000	683600	13	4	4	8	6	3	1	3	1	10.7	3.6	3.6	127.4	8.2784	9	13	60
1201	D1BM61|D1BM61	tr|D1BM61|D1BM61_VEIPT	tr|D1BM61|D1BM61_VEIPT Ribosome-binding factor A OS=Veillonella parvula (strain ATCC 10790 / DSM 2008 / CCUG 5123 / JCM 12972 / NCTC 11810 / Te3) OX=479436 GN=rbfA PE=3 SV=1	8	2482700	88393000	5	5	3	2	4	2	4	0	3	40.7	40.7	28	13.525	19.729	1	18	25
1202	E1LDH6|E1LDH6	tr|E1LDH6|E1LDH6_9FIRM	tr|E1LDH6|E1LDH6_9FIRM Histidinol-phosphate aminotransferase OS=Veillonella atypica ACS-134-V-Col7a OX=866778 GN=hisC PE=3 SV=1	18	2377600	167440000	2	2	2	1	1	1	1	1	1	8.6	8.6	8.6	40.148	6.6294	1	11	19
1203	E1LBT1|E1LBT1	tr|E1LBT1|E1LBT1_9FIRM	tr|E1LBT1|E1LBT1_9FIRM Formate--tetrahydrofolate ligase OS=Veillonella atypica ACS-134-V-Col7a OX=866778 GN=fhs PE=3 SV=1	35	2306400	1085900	6	6	3	5	1	5	1	2	1	11.2	11.2	4.9	59.836	5.0545	5	2	7
1204	D1BQ51|D1BQ51	tr|D1BQ51|D1BQ51_VEIPT	tr|D1BQ51|D1BQ51_VEIPT Uncharacterized protein OS=Veillonella parvula (strain ATCC 10790 / DSM 2008 / CCUG 5123 / JCM 12972 / NCTC 11810 / Te3) OX=479436 GN=Vpar_1834 PE=4 SV=1	15	2295900	516540	4	3	3	1	1	0	1	0	1	16	13.8	13.8	30.174	22.017	22	0	31
1205	D1BPI0|D1BPI0	tr|D1BPI0|D1BPI0_VEIPT	tr|D1BPI0|D1BPI0_VEIPT 3-dehydroquinate synthase OS=Veillonella parvula (strain ATCC 10790 / DSM 2008 / CCUG 5123 / JCM 12972 / NCTC 11810 / Te3) OX=479436 GN=aroB PE=3 SV=1	21	2060100	2793900	5	5	3	2	4	2	4	1	2	16.3	16.3	11.4	37.836	3.4266	5	4	10
1206	D1BQL7|D1BQL7;E1LAX9|E1LAX9	tr|D1BQL7|D1BQL7_VEIPT;tr|E1LAX9|E1LAX9_9FIRM	tr|D1BQL7|D1BQL7_VEIPT Serine acetyltransferase OS=Veillonella parvula (strain ATCC 10790 / DSM 2008 / CCUG 5123 / JCM 12972 / NCTC 11810 / Te3) OX=479436 GN=Vpar_0142 PE=3 SV=1;tr|E1LAX9|E1LAX9_9FIRM Serine O-acetyltransferase OS=Veillonella atypica ACS-1	11	1890500	4888300	2	2	2	1	1	1	1	1	1	11.3	11.3	11.3	22.876	25.281	2	8	32
1207	D1BQ33|D1BQ33	tr|D1BQ33|D1BQ33_VEIPT	tr|D1BQ33|D1BQ33_VEIPT Uncharacterized protein OS=Veillonella parvula (strain ATCC 10790 / DSM 2008 / CCUG 5123 / JCM 12972 / NCTC 11810 / Te3) OX=479436 GN=Vpar_1815 PE=4 SV=1	31	1862000	40846000	17	17	17	1	17	1	17	1	17	33.7	33.7	33.7	58.858	122.82	1	79	80
1208	D1BPD5|D1BPD5	tr|D1BPD5|D1BPD5_VEIPT	tr|D1BPD5|D1BPD5_VEIPT Putrescine transporter OS=Veillonella parvula (strain ATCC 10790 / DSM 2008 / CCUG 5123 / JCM 12972 / NCTC 11810 / Te3) OX=479436 GN=Vpar_1566 PE=3 SV=1	7	1841600	57808	3	3	3	1	1	1	1	1	1	6.5	6.5	6.5	47.991	28.029	0	0	39
1209	D1BLS6|D1BLS6;E1LCT5|E1LCT5	tr|D1BLS6|D1BLS6_VEIPT;tr|E1LCT5|E1LCT5_9FIRM	tr|D1BLS6|D1BLS6_VEIPT Biotin transporter OS=Veillonella parvula (strain ATCC 10790 / DSM 2008 / CCUG 5123 / JCM 12972 / NCTC 11810 / Te3) OX=479436 GN=Vpar_0650 PE=3 SV=1;tr|E1LCT5|E1LCT5_9FIRM Biotin transporter OS=Veillonella atypica ACS-134-V-Col7a OX=	6	1793500	2716800	2	2	2	1	2	1	2	1	2	10.6	10.6	10.6	18.348	6.2454	25	4	41
1210	D1BM63|D1BM63	tr|D1BM63|D1BM63_VEIPT	tr|D1BM63|D1BM63_VEIPT tRNA pseudouridine synthase B OS=Veillonella parvula (strain ATCC 10790 / DSM 2008 / CCUG 5123 / JCM 12972 / NCTC 11810 / Te3) OX=479436 GN=truB PE=3 SV=1	24	1789400	1650300	6	4	4	2	5	0	4	0	4	18.2	14.1	14.1	34.721	3.762	2	7	12
1211	D1BQZ8|D1BQZ8;E1L9W2|E1L9W2	tr|D1BQZ8|D1BQZ8_VEIPT	tr|D1BQZ8|D1BQZ8_VEIPT NH(3)-dependent NAD(+) synthetase OS=Veillonella parvula (strain ATCC 10790 / DSM 2008 / CCUG 5123 / JCM 12972 / NCTC 11810 / Te3) OX=479436 GN=Vpar_0277 PE=3 SV=1	16	1773600	4186300	4	4	4	1	3	1	3	1	3	17.6	17.6	17.6	27.57	15.222	1	3	4
1212	E1LD80|E1LD80	tr|E1LD80|E1LD80_9FIRM	tr|E1LD80|E1LD80_9FIRM ABC transporter, ATP-binding protein OS=Veillonella atypica ACS-134-V-Col7a OX=866778 GN=HMPREF9684_0924 PE=4 SV=1	10	1732700	5956600	3	1	1	2	2	0	0	0	0	15.8	7.5	7.5	28.91	10.615	4	4	10
1213	D1BMB0|D1BMB0	tr|D1BMB0|D1BMB0_VEIPT	tr|D1BMB0|D1BMB0_VEIPT Phosphopantetheine adenylyltransferase OS=Veillonella parvula (strain ATCC 10790 / DSM 2008 / CCUG 5123 / JCM 12972 / NCTC 11810 / Te3) OX=479436 GN=coaD PE=3 SV=1	10	1732600	2037100	3	3	1	2	2	2	2	0	1	17.2	17.2	4.3	18.449	3.4074	5	2	7
1214	D1BLW8|D1BLW8;E1LCD1|E1LCD1	tr|D1BLW8|D1BLW8_VEIPT;tr|E1LCD1|E1LCD1_9FIRM	tr|D1BLW8|D1BLW8_VEIPT Uncharacterized protein OS=Veillonella parvula (strain ATCC 10790 / DSM 2008 / CCUG 5123 / JCM 12972 / NCTC 11810 / Te3) OX=479436 GN=Vpar_0692 PE=4 SV=1;tr|E1LCD1|E1LCD1_9FIRM Putative ACR, COG1399 OS=Veillonella atypica ACS-134-V-C	10	1698800	4594100	2	2	2	1	2	1	2	1	2	5.3	5.3	5.3	19.326	2.0759	0	1	2
1215	E1LA84|E1LA84	tr|E1LA84|E1LA84_9FIRM	tr|E1LA84|E1LA84_9FIRM Arginine--tRNA ligase OS=Veillonella atypica ACS-134-V-Col7a OX=866778 GN=argS PE=3 SV=1	33	1698800	1661300	5	2	2	3	2	2	0	2	0	10.1	4.7	4.7	64.787	2.8427	6	2	9
1216	E1LCQ5|E1LCQ5	tr|E1LCQ5|E1LCQ5_9FIRM	tr|E1LCQ5|E1LCQ5_9FIRM ATP-dependent RecD-like DNA helicase OS=Veillonella atypica ACS-134-V-Col7a OX=866778 GN=recD2 PE=3 SV=1	40	1697300	66309	2	1	1	2	1	1	0	1	0	2.8	1.7	1.7	81.012	1.8228	3	0	3
1217	D1BNM5|D1BNM5	tr|D1BNM5|D1BNM5_VEIPT	tr|D1BNM5|D1BNM5_VEIPT Amidohydrolase OS=Veillonella parvula (strain ATCC 10790 / DSM 2008 / CCUG 5123 / JCM 12972 / NCTC 11810 / Te3) OX=479436 GN=Vpar_1303 PE=4 SV=1	23	1668800	10150000	5	5	3	1	4	1	4	1	2	13	13	7.9	43.262	3.8584	1	5	6
1218	E1LDD1|E1LDD1	tr|E1LDD1|E1LDD1_9FIRM	tr|E1LDD1|E1LDD1_9FIRM Glycerol-3-phosphate dehydrogenase [NAD(P)+] OS=Veillonella atypica ACS-134-V-Col7a OX=866778 GN=gpsA PE=3 SV=1	18	1655800	12579000	6	3	3	3	5	2	2	2	2	14.8	8.7	8.7	36.203	11.894	4	6	11
1219	E1L9E4|E1L9E4	tr|E1L9E4|E1L9E4_9FIRM	tr|E1L9E4|E1L9E4_9FIRM Exonuclease SbcCD, C subunit (Fragment) OS=Veillonella atypica ACS-134-V-Col7a OX=866778 GN=HMPREF9684_0750 PE=4 SV=1	63	1647800	533110	6	3	3	6	1	3	0	3	0	6.1	3	3	115.36	32.205	9	2	12
1220	D1BN64|D1BN64;E1L974|E1L974	tr|D1BN64|D1BN64_VEIPT;tr|E1L974|E1L974_9FIRM	tr|D1BN64|D1BN64_VEIPT Precorrin-6x reductase OS=Veillonella parvula (strain ATCC 10790 / DSM 2008 / CCUG 5123 / JCM 12972 / NCTC 11810 / Te3) OX=479436 GN=Vpar_1140 PE=4 SV=1;tr|E1L974|E1L974_9FIRM Precorrin-6A reductase OS=Veillonella atypica ACS-134-V-C	19	1615800	6879000	6	6	6	1	6	1	6	1	6	23.3	23.3	23.3	29.05	5.5209	0	7	7
1221	E1LAU4|E1LAU4	tr|E1LAU4|E1LAU4_9FIRM	tr|E1LAU4|E1LAU4_9FIRM Bifunctional enzyme IspD/IspF OS=Veillonella atypica ACS-134-V-Col7a OX=866778 GN=ispF PE=3 SV=1	24	1601700	451970	4	3	3	3	1	3	0	3	0	10	7.2	7.2	42.635	3.7617	4	3	8
1222	D1BPD0|D1BPD0	tr|D1BPD0|D1BPD0_VEIPT	tr|D1BPD0|D1BPD0_VEIPT ABC transporter related protein OS=Veillonella parvula (strain ATCC 10790 / DSM 2008 / CCUG 5123 / JCM 12972 / NCTC 11810 / Te3) OX=479436 GN=Vpar_1561 PE=4 SV=1	11	1575200	5415100	4	4	2	2	4	2	4	0	2	16.6	16.6	8.3	28.937	12.94	4	7	11
1223	D1BM66|D1BM66	tr|D1BM66|D1BM66_VEIPT	tr|D1BM66|D1BM66_VEIPT ATP-dependent RecD-like DNA helicase OS=Veillonella parvula (strain ATCC 10790 / DSM 2008 / CCUG 5123 / JCM 12972 / NCTC 11810 / Te3) OX=479436 GN=recD2 PE=3 SV=1	44	1543000	282470	2	2	1	1	2	1	2	0	1	3.2	3.2	2.1	81.203	3.2641	2	1	3
1224	E1LA09|E1LA09	tr|E1LA09|E1LA09_9FIRM	tr|E1LA09|E1LA09_9FIRM DNA polymerase III, subunit gamma and tau OS=Veillonella atypica ACS-134-V-Col7a OX=866778 GN=dnaX PE=3 SV=1	48	1528300	2477100	6	4	4	3	3	3	1	3	1	6.1	4	4	88.002	2.3622	4	5	12
1225	D1BN12|D1BN12;E1L9B3|E1L9B3	tr|D1BN12|D1BN12_VEIPT	tr|D1BN12|D1BN12_VEIPT Triosephosphate isomerase OS=Veillonella parvula (strain ATCC 10790 / DSM 2008 / CCUG 5123 / JCM 12972 / NCTC 11810 / Te3) OX=479436 GN=tpiA PE=3 SV=1	10	1502500	8815500	3	3	3	1	3	1	3	1	3	12.9	12.9	12.9	27.792	15.22	1	3	4
1226	E1LBQ6|E1LBQ6	tr|E1LBQ6|E1LBQ6_9FIRM	tr|E1LBQ6|E1LBQ6_9FIRM tRNA N6-adenosine threonylcarbamoyltransferase OS=Veillonella atypica ACS-134-V-Col7a OX=866778 GN=tsaD PE=3 SV=1	18	1502400	960220	3	1	1	2	1	1	0	1	0	9	2.9	2.9	36.383	3.0459	2	1	4
1227	E1LCU4|E1LCU4	tr|E1LCU4|E1LCU4_9FIRM	tr|E1LCU4|E1LCU4_9FIRM Adenine DNA glycosylase OS=Veillonella atypica ACS-134-V-Col7a OX=866778 GN=mutY PE=3 SV=1	20	1433600	1657600	3	3	2	1	2	1	2	0	2	9	9	6.3	41.65	1.8063	1	1	2
1228	D1BMR7|D1BMR7	tr|D1BMR7|D1BMR7_VEIPT	tr|D1BMR7|D1BMR7_VEIPT Radical SAM core domain-containing protein OS=Veillonella parvula (strain ATCC 10790 / DSM 2008 / CCUG 5123 / JCM 12972 / NCTC 11810 / Te3) OX=479436 GN=Vpar_0993 PE=4 SV=1	22	1433100	1379500	3	3	2	2	2	2	2	1	2	8.1	8.1	4.4	37.065	2.2412	2	2	4
1229	D1BLE8|D1BLE8;E1LEA6|E1LEA6	tr|D1BLE8|D1BLE8_VEIPT;tr|E1LEA6|E1LEA6_9FIRM	tr|D1BLE8|D1BLE8_VEIPT Uncharacterized protein OS=Veillonella parvula (strain ATCC 10790 / DSM 2008 / CCUG 5123 / JCM 12972 / NCTC 11810 / Te3) OX=479436 GN=Vpar_0522 PE=3 SV=1;tr|E1LEA6|E1LEA6_9FIRM Uncharacterized protein OS=Veillonella atypica ACS-134-V	8	1416200	2512900	2	2	2	1	1	1	1	1	1	9.1	9.1	9.1	26.748	8.2622	0	5	19
1230	E1LAT8|E1LAT8	tr|E1LAT8|E1LAT8_9FIRM	tr|E1LAT8|E1LAT8_9FIRM Uncharacterized protein OS=Veillonella atypica ACS-134-V-Col7a OX=866778 GN=HMPREF9684_0275 PE=4 SV=1	11	1413900	3213000	2	2	2	1	1	1	1	1	1	11.2	11.2	11.2	20.696	4.4729	1	1	2
1231	D1BR11|D1BR11	tr|D1BR11|D1BR11_VEIPT	tr|D1BR11|D1BR11_VEIPT Xanthine and CO dehydrogenase maturation factor XdhC/CoxF family-like protein OS=Veillonella parvula (strain ATCC 10790 / DSM 2008 / CCUG 5123 / JCM 12972 / NCTC 11810 / Te3) OX=479436 GN=Vpar_0290 PE=4 SV=1	11	1411600	17966000	6	6	6	2	5	2	5	2	5	38.4	38.4	38.4	27.179	51.003	7	35	43
1232	D1BPE4|D1BPE4;E1LD69|E1LD69	tr|D1BPE4|D1BPE4_VEIPT;tr|E1LD69|E1LD69_9FIRM	tr|D1BPE4|D1BPE4_VEIPT Diaminopimelate epimerase OS=Veillonella parvula (strain ATCC 10790 / DSM 2008 / CCUG 5123 / JCM 12972 / NCTC 11810 / Te3) OX=479436 GN=dapF PE=3 SV=1;tr|E1LD69|E1LD69_9FIRM Diaminopimelate epimerase OS=Veillonella atypica ACS-134-V-	11	1337900	12357000	4	4	4	1	1	1	1	1	1	18.4	18.4	18.4	30.128	9.6737	1	2	9
1233	D1BMF5|D1BMF5	tr|D1BMF5|D1BMF5_VEIPT	tr|D1BMF5|D1BMF5_VEIPT Protein GrpE OS=Veillonella parvula (strain ATCC 10790 / DSM 2008 / CCUG 5123 / JCM 12972 / NCTC 11810 / Te3) OX=479436 GN=grpE PE=3 SV=1	11	1319300	927930	1	1	1	1	1	1	1	1	1	6.1	6.1	6.1	20.47	6.7379	0	3	3
1234	D1BLP6|D1BLP6	tr|D1BLP6|D1BLP6_VEIPT	tr|D1BLP6|D1BLP6_VEIPT Polyphosphate kinase OS=Veillonella parvula (strain ATCC 10790 / DSM 2008 / CCUG 5123 / JCM 12972 / NCTC 11810 / Te3) OX=479436 GN=ppk PE=3 SV=1	46	1274800	1053000	5	1	1	4	2	1	0	1	0	6	1.1	1.1	81.48	-2	5	1	6
1235	E1LB29|E1LB29	tr|E1LB29|E1LB29_9FIRM	tr|E1LB29|E1LB29_9FIRM TonB family domain protein OS=Veillonella atypica ACS-134-V-Col7a OX=866778 GN=HMPREF9684_1568 PE=3 SV=1	8	1165200	39824000	2	1	1	1	1	1	0	1	0	8.5	5.3	5.3	25.295	17.171	4	2	6
1236	E1L943|E1L943	tr|E1L943|E1L943_9FIRM	tr|E1L943|E1L943_9FIRM Putative dGTPase OS=Veillonella atypica ACS-134-V-Col7a OX=866778 GN=HMPREF9684_1879 PE=4 SV=1	20	1158600	505560	3	3	1	1	1	1	1	1	0	11.6	11.6	4.3	37.898	3.461	1	1	4
1237	D1BR69|D1BR69;E1LBC7|E1LBC7	tr|D1BR69|D1BR69_VEIPT	tr|D1BR69|D1BR69_VEIPT Uracil-xanthine permease OS=Veillonella parvula (strain ATCC 10790 / DSM 2008 / CCUG 5123 / JCM 12972 / NCTC 11810 / Te3) OX=479436 GN=Vpar_0348 PE=3 SV=1	10	1142200	20763000	4	4	4	2	3	2	3	2	3	6.3	6.3	6.3	44.927	5.9531	1	3	12
1238	D1BPZ0|D1BPZ0;E1LD51|E1LD51	tr|D1BPZ0|D1BPZ0_VEIPT;tr|E1LD51|E1LD51_9FIRM	tr|D1BPZ0|D1BPZ0_VEIPT Chloride channel core OS=Veillonella parvula (strain ATCC 10790 / DSM 2008 / CCUG 5123 / JCM 12972 / NCTC 11810 / Te3) OX=479436 GN=Vpar_1771 PE=4 SV=1;tr|E1LD51|E1LD51_9FIRM Chloride transporter, ClC family OS=Veillonella atypica AC	16	1139900	684140	3	3	3	2	2	2	2	2	2	6.2	6.2	6.2	55.396	7.8045	8	3	15
1239	D1BPL4|D1BPL4	tr|D1BPL4|D1BPL4_VEIPT	tr|D1BPL4|D1BPL4_VEIPT Iron-containing alcohol dehydrogenase OS=Veillonella parvula (strain ATCC 10790 / DSM 2008 / CCUG 5123 / JCM 12972 / NCTC 11810 / Te3) OX=479436 GN=Vpar_1645 PE=3 SV=1	18	1138700	3199800	6	6	2	3	4	3	4	2	1	12.9	12.9	5.9	42.504	9.4159	3	5	8
1240	E1LB16|E1LB16	tr|E1LB16|E1LB16_9FIRM	tr|E1LB16|E1LB16_9FIRM Periplasmic binding protein OS=Veillonella atypica ACS-134-V-Col7a OX=866778 GN=HMPREF9684_1555 PE=4 SV=1	14	1117800	11504000	2	1	1	2	1	1	0	1	0	8.3	5.6	5.6	32.562	2.2983	1	2	5
1241	D1BN84|D1BN84	tr|D1BN84|D1BN84_VEIPT	tr|D1BN84|D1BN84_VEIPT Uncharacterized protein OS=Veillonella parvula (strain ATCC 10790 / DSM 2008 / CCUG 5123 / JCM 12972 / NCTC 11810 / Te3) OX=479436 GN=Vpar_1160 PE=4 SV=1	91	1093500	3023200	8	8	8	1	8	1	8	1	8	4.9	4.9	4.9	160.03	10.132	0	8	9
1242	E1LA10|E1LA10	tr|E1LA10|E1LA10_9FIRM	tr|E1LA10|E1LA10_9FIRM Class II glutamine amidotransferase OS=Veillonella atypica ACS-134-V-Col7a OX=866778 GN=HMPREF9684_1618 PE=3 SV=1	95	976730	114120	2	2	2	2	1	2	1	2	1	1.2	1.2	1.2	168.7	2.0597	2	0	2
1243	E1LE46|E1LE46	tr|E1LE46|E1LE46_9FIRM	tr|E1LE46|E1LE46_9FIRM DUF4178 domain-containing protein OS=Veillonella atypica ACS-134-V-Col7a OX=866778 GN=HMPREF9684_1111 PE=4 SV=1	22	959060	1022700	2	2	1	2	1	2	1	1	0	4.9	4.9	2.6	40.471	3.6271	3	1	4
1244	D1BLY6|D1BLY6	tr|D1BLY6|D1BLY6_VEIPT	tr|D1BLY6|D1BLY6_VEIPT UvrABC system protein C OS=Veillonella parvula (strain ATCC 10790 / DSM 2008 / CCUG 5123 / JCM 12972 / NCTC 11810 / Te3) OX=479436 GN=uvrC PE=3 SV=1	38	903920	1083800	4	4	1	2	3	2	3	0	1	6.4	6.4	1.5	70.798	2.9122	3	6	11
1245	D1BMI7|D1BMI7	tr|D1BMI7|D1BMI7_VEIPT	tr|D1BMI7|D1BMI7_VEIPT Peptidase M24 OS=Veillonella parvula (strain ATCC 10790 / DSM 2008 / CCUG 5123 / JCM 12972 / NCTC 11810 / Te3) OX=479436 GN=Vpar_0913 PE=3 SV=1	24	893710	6368000	5	3	3	2	4	0	3	0	3	13.7	9.2	9.2	39.654	2.4731	3	5	8
1246	E1LAW0|E1LAW0	tr|E1LAW0|E1LAW0_9FIRM	tr|E1LAW0|E1LAW0_9FIRM Uncharacterized protein OS=Veillonella atypica ACS-134-V-Col7a OX=866778 GN=HMPREF9684_0551 PE=4 SV=1	10	888250	3376900	2	2	2	1	1	1	1	1	1	6.4	6.4	6.4	32.215	2.3109	3	1	6
1247	D1BQQ9|D1BQQ9	tr|D1BQQ9|D1BQQ9_VEIPT	tr|D1BQQ9|D1BQQ9_VEIPT Cytosine-specific methyltransferase OS=Veillonella parvula (strain ATCC 10790 / DSM 2008 / CCUG 5123 / JCM 12972 / NCTC 11810 / Te3) OX=479436 GN=Vpar_0184 PE=3 SV=1	27	784620	13094000	10	10	10	1	10	1	10	1	10	24.6	24.6	24.6	48.837	38.447	0	31	31
1248	D1BR40|D1BR40	tr|D1BR40|D1BR40_VEIPT	tr|D1BR40|D1BR40_VEIPT SirA family protein OS=Veillonella parvula (strain ATCC 10790 / DSM 2008 / CCUG 5123 / JCM 12972 / NCTC 11810 / Te3) OX=479436 GN=Vpar_0319 PE=3 SV=1	14	771340	2841900	3	3	3	1	3	1	3	1	3	22.6	22.6	22.6	21.877	179.21	0	3	3
1249	D1BNV2|D1BNV2	tr|D1BNV2|D1BNV2_VEIPT	tr|D1BNV2|D1BNV2_VEIPT Uncharacterized protein OS=Veillonella parvula (strain ATCC 10790 / DSM 2008 / CCUG 5123 / JCM 12972 / NCTC 11810 / Te3) OX=479436 GN=Vpar_1381 PE=4 SV=1	7	764420	1876000	2	2	2	1	2	1	2	1	2	13.6	13.6	13.6	22.554	1.9707	0	2	3
1250	D1BN26|D1BN26	tr|D1BN26|D1BN26_VEIPT	tr|D1BN26|D1BN26_VEIPT Uncharacterized protein OS=Veillonella parvula (strain ATCC 10790 / DSM 2008 / CCUG 5123 / JCM 12972 / NCTC 11810 / Te3) OX=479436 GN=Vpar_1102 PE=4 SV=1	18	751960	6365900	4	4	3	1	3	1	3	0	3	7.3	7.3	6	54.386	11.425	1	7	11
1251	D1BMT7|D1BMT7;E1LAT9|E1LAT9	tr|D1BMT7|D1BMT7_VEIPT;tr|E1LAT9|E1LAT9_9FIRM	tr|D1BMT7|D1BMT7_VEIPT RNA methyltransferase, TrmH family, group 3 OS=Veillonella parvula (strain ATCC 10790 / DSM 2008 / CCUG 5123 / JCM 12972 / NCTC 11810 / Te3) OX=479436 GN=Vpar_1013 PE=4 SV=1;tr|E1LAT9|E1LAT9_9FIRM RNA methyltransferase, TrmH family,	10	746300	310640	2	2	2	1	1	1	1	1	1	9.5	9.5	9.5	26.346	4.6966	3	0	5
1252	E1L942|E1L942	tr|E1L942|E1L942_9FIRM	tr|E1L942|E1L942_9FIRM ATP-dependent DNA helicase RecG OS=Veillonella atypica ACS-134-V-Col7a OX=866778 GN=recG PE=3 SV=1	40	738860	818980	5	5	2	2	4	2	4	2	1	6.3	6.3	2.6	76.817	2.6186	2	3	6
1253	E1L925|E1L925	tr|E1L925|E1L925_9FIRM	tr|E1L925|E1L925_9FIRM Outer membrane autotransporter barrel domain protein OS=Veillonella atypica ACS-134-V-Col7a OX=866778 GN=HMPREF9684_0872 PE=4 SV=1	32	726520	122750	7	4	4	1	1	1	0	1	0	8.4	4.3	4.3	79.47	56.111	0	0	144
1254	E1L9M8|E1L9M8	tr|E1L9M8|E1L9M8_9FIRM	tr|E1L9M8|E1L9M8_9FIRM Proline--tRNA ligase OS=Veillonella atypica ACS-134-V-Col7a OX=866778 GN=proS PE=3 SV=1	33	709900	3225900	8	3	3	5	5	3	0	3	0	15	5.6	5.6	63.769	13.466	10	12	28
1255	D1BPH4|D1BPH4	tr|D1BPH4|D1BPH4_VEIPT	tr|D1BPH4|D1BPH4_VEIPT Uncharacterized protein OS=Veillonella parvula (strain ATCC 10790 / DSM 2008 / CCUG 5123 / JCM 12972 / NCTC 11810 / Te3) OX=479436 GN=Vpar_1605 PE=4 SV=1	23	707140	1360000	5	5	5	1	1	1	1	1	1	8.5	8.5	8.5	59.836	10.288	0	0	10
1256	D1BN17|D1BN17;E1L9B8|E1L9B8	tr|D1BN17|D1BN17_VEIPT;tr|E1L9B8|E1L9B8_9FIRM	tr|D1BN17|D1BN17_VEIPT Serine hydroxymethyltransferase OS=Veillonella parvula (strain ATCC 10790 / DSM 2008 / CCUG 5123 / JCM 12972 / NCTC 11810 / Te3) OX=479436 GN=glyA PE=3 SV=1;tr|E1L9B8|E1L9B8_9FIRM Serine hydroxymethyltransferase OS=Veillonella atypic	20	690410	18032000	8	8	8	2	8	2	8	2	8	20.7	20.7	20.7	44.423	10.759	1	13	18
1257	D1BQY8|D1BQY8;E1LDU5|E1LDU5	tr|D1BQY8|D1BQY8_VEIPT;tr|E1LDU5|E1LDU5_9FIRM	tr|D1BQY8|D1BQY8_VEIPT Aminotransferase class I and II OS=Veillonella parvula (strain ATCC 10790 / DSM 2008 / CCUG 5123 / JCM 12972 / NCTC 11810 / Te3) OX=479436 GN=Vpar_0267 PE=4 SV=1;tr|E1LDU5|E1LDU5_9FIRM Aminotransferase, class I/II OS=Veillonella atyp	25	685960	997580	2	2	2	1	2	1	2	1	2	3.8	3.8	3.8	45.663	1.9274	1	4	6
1258	E1LBS8|E1LBS8	tr|E1LBS8|E1LBS8_9FIRM	tr|E1LBS8|E1LBS8_9FIRM Tartrate dehydratase subunit alpha OS=Veillonella atypica ACS-134-V-Col7a OX=866778 GN=HMPREF9684_0413 PE=3 SV=1	18	685430	1109300	3	2	2	2	1	2	0	2	0	10.3	7.3	7.3	32.962	2.3836	2	1	3
1259	E1LAG5|E1LAG5	tr|E1LAG5|E1LAG5_9FIRM	tr|E1LAG5|E1LAG5_9FIRM Uncharacterized protein OS=Veillonella atypica ACS-134-V-Col7a OX=866778 GN=HMPREF9684_1920 PE=4 SV=1	16	670970	661630	5	5	3	3	2	3	2	3	0	10.3	10.3	7.4	49.401	6.0052	8	1	12
1260	D1BPF9|D1BPF9	tr|D1BPF9|D1BPF9_VEIPT	tr|D1BPF9|D1BPF9_VEIPT HAD-superfamily hydrolase, subfamily IIB OS=Veillonella parvula (strain ATCC 10790 / DSM 2008 / CCUG 5123 / JCM 12972 / NCTC 11810 / Te3) OX=479436 GN=Vpar_1590 PE=4 SV=1	15	647420	13473000	5	5	5	1	5	1	5	1	5	17.1	17.1	17.1	30.039	28.651	1	7	8
1261	D1BMA2|D1BMA2	tr|D1BMA2|D1BMA2_VEIPT	tr|D1BMA2|D1BMA2_VEIPT HI0933 family protein OS=Veillonella parvula (strain ATCC 10790 / DSM 2008 / CCUG 5123 / JCM 12972 / NCTC 11810 / Te3) OX=479436 GN=Vpar_0828 PE=4 SV=1	25	638890	6210200	5	4	4	1	3	0	3	0	3	10.1	8.4	8.4	45.239	2.2495	2	9	13
1262	D1BN19|D1BN19;E1L9C0|E1L9C0	tr|D1BN19|D1BN19_VEIPT;tr|E1L9C0|E1L9C0_9FIRM	tr|D1BN19|D1BN19_VEIPT Protein tyrosine phosphatase OS=Veillonella parvula (strain ATCC 10790 / DSM 2008 / CCUG 5123 / JCM 12972 / NCTC 11810 / Te3) OX=479436 GN=Vpar_1095 PE=3 SV=1;tr|E1L9C0|E1L9C0_9FIRM Low molecular weight phosphotyrosine protein phosph	8	601060	12639000	2	2	2	1	2	1	2	1	2	12.8	12.8	12.8	16.059	4.8986	0	3	3
1263	E1LCT8|E1LCT8	tr|E1LCT8|E1LCT8_9FIRM	tr|E1LCT8|E1LCT8_9FIRM Uncharacterized protein OS=Veillonella atypica ACS-134-V-Col7a OX=866778 GN=HMPREF9684_1702 PE=3 SV=1	19	549910	386080	3	3	2	2	1	2	1	2	0	9.3	9.3	7.2	37.089	2.4395	2	1	3
1264	E1LA05|E1LA05	tr|E1LA05|E1LA05_9FIRM	tr|E1LA05|E1LA05_9FIRM DNA helicase OS=Veillonella atypica ACS-134-V-Col7a OX=866778 GN=HMPREF9684_1612 PE=3 SV=1	58	535490	723540	6	6	6	4	2	4	2	4	2	6.4	6.4	6.4	99.833	3.5477	5	2	8
1265	D1BQJ2|D1BQJ2	tr|D1BQJ2|D1BQJ2_VEIPT	tr|D1BQJ2|D1BQJ2_VEIPT Site-specific DNA-methyltransferase (adenine-specific) OS=Veillonella parvula (strain ATCC 10790 / DSM 2008 / CCUG 5123 / JCM 12972 / NCTC 11810 / Te3) OX=479436 GN=Vpar_0116 PE=4 SV=1	36	532610	3415400	4	4	4	1	4	1	4	1	4	6.5	6.5	6.5	68.996	1.9816	0	5	5
1266	D1BNY6|D1BNY6	tr|D1BNY6|D1BNY6_VEIPT	tr|D1BNY6|D1BNY6_VEIPT Uncharacterized protein OS=Veillonella parvula (strain ATCC 10790 / DSM 2008 / CCUG 5123 / JCM 12972 / NCTC 11810 / Te3) OX=479436 GN=Vpar_1416 PE=4 SV=1	9	520230	781700	1	1	1	1	1	1	1	1	1	7.7	7.7	7.7	16.883	2.2809	0	2	2
1267	D1BMM2|D1BMM2	tr|D1BMM2|D1BMM2_VEIPT	tr|D1BMM2|D1BMM2_VEIPT Methylthioribose-1-phosphate isomerase OS=Veillonella parvula (strain ATCC 10790 / DSM 2008 / CCUG 5123 / JCM 12972 / NCTC 11810 / Te3) OX=479436 GN=mtnA PE=3 SV=1	19	517530	37020000	6	6	6	1	6	1	6	1	6	19.2	19.2	19.2	38.726	21.99	0	18	18
1268	D1BR47|D1BR47	tr|D1BR47|D1BR47_VEIPT	tr|D1BR47|D1BR47_VEIPT ABC transporter related protein OS=Veillonella parvula (strain ATCC 10790 / DSM 2008 / CCUG 5123 / JCM 12972 / NCTC 11810 / Te3) OX=479436 GN=Vpar_0326 PE=4 SV=1	17	483080	21523000	7	7	7	1	7	1	7	1	7	35.3	35.3	35.3	29.039	21.105	0	47	47
1269	E1LE44|E1LE44;D1BLL0|D1BLL0	tr|E1LE44|E1LE44_9FIRM;tr|D1BLL0|D1BLL0_VEIPT	tr|E1LE44|E1LE44_9FIRM Glutathionylspermidine synthase OS=Veillonella atypica ACS-134-V-Col7a OX=866778 GN=HMPREF9684_1109 PE=4 SV=1;tr|D1BLL0|D1BLL0_VEIPT Glutathionylspermidine synthase-like protein OS=Veillonella parvula (strain ATCC 10790 / DSM 2008 /	24	481210	1754500	3	3	3	2	2	2	2	2	2	6	6	6	50.829	1.7833	1	1	3
1270	D1BMA8|D1BMA8	tr|D1BMA8|D1BMA8_VEIPT	tr|D1BMA8|D1BMA8_VEIPT Glycerol-3-phosphate dehydrogenase [NAD(P)+] OS=Veillonella parvula (strain ATCC 10790 / DSM 2008 / CCUG 5123 / JCM 12972 / NCTC 11810 / Te3) OX=479436 GN=gpsA PE=3 SV=1	20	472340	8257100	10	10	7	2	8	2	8	1	5	25.3	25.3	19.3	35.685	10.406	2	13	19
1271	D1BLH8|D1BLH8	tr|D1BLH8|D1BLH8_VEIPT	tr|D1BLH8|D1BLH8_VEIPT Uncharacterized protein OS=Veillonella parvula (strain ATCC 10790 / DSM 2008 / CCUG 5123 / JCM 12972 / NCTC 11810 / Te3) OX=479436 GN=Vpar_0552 PE=4 SV=1	12	452710	9506800	5	5	4	1	5	1	5	1	4	35.4	35.4	26.3	19.874	10.871	0	6	6
1272	D1BPI1|D1BPI1;E1L9Z0|E1L9Z0	tr|D1BPI1|D1BPI1_VEIPT;tr|E1L9Z0|E1L9Z0_9FIRM	tr|D1BPI1|D1BPI1_VEIPT 3-phosphoshikimate 1-carboxyvinyltransferase OS=Veillonella parvula (strain ATCC 10790 / DSM 2008 / CCUG 5123 / JCM 12972 / NCTC 11810 / Te3) OX=479436 GN=aroA PE=3 SV=1;tr|E1L9Z0|E1L9Z0_9FIRM 3-phosphoshikimate 1-carboxyvinyltransfe	21	450500	7205100	4	4	4	1	4	1	4	1	4	10.9	10.9	10.9	44.73	4.3284	0	6	7
1273	E1LDS7|E1LDS7	tr|E1LDS7|E1LDS7_9FIRM	tr|E1LDS7|E1LDS7_9FIRM Phosphoglucomutase (alpha-D-glucose-1,6-bisphosphate-dependent) OS=Veillonella atypica ACS-134-V-Col7a OX=866778 GN=HMPREF9684_0992 PE=3 SV=1	27	435550	1294100	4	2	2	2	2	2	0	2	0	9.9	6.4	6.4	59.498	2.7879	8	2	10
1274	D1BPH7|D1BPH7;E1L9Y6|E1L9Y6	tr|D1BPH7|D1BPH7_VEIPT	tr|D1BPH7|D1BPH7_VEIPT Septicolysin OS=Veillonella parvula (strain ATCC 10790 / DSM 2008 / CCUG 5123 / JCM 12972 / NCTC 11810 / Te3) OX=479436 GN=Vpar_1608 PE=4 SV=1	13	425650	4553100	4	4	4	2	4	2	4	2	4	25.7	25.7	25.7	17.063	6.1857	1	7	10
1275	D1BM56|D1BM56	tr|D1BM56|D1BM56_VEIPT	tr|D1BM56|D1BM56_VEIPT Ribosome maturation factor RimP OS=Veillonella parvula (strain ATCC 10790 / DSM 2008 / CCUG 5123 / JCM 12972 / NCTC 11810 / Te3) OX=479436 GN=rimP PE=3 SV=1	8	425090	269800000	7	7	5	2	6	2	6	1	4	44.7	44.7	34.9	17.273	50.818	3	59	62
1276	D1BNS7|D1BNS7	tr|D1BNS7|D1BNS7_VEIPT	tr|D1BNS7|D1BNS7_VEIPT ABC transporter related protein OS=Veillonella parvula (strain ATCC 10790 / DSM 2008 / CCUG 5123 / JCM 12972 / NCTC 11810 / Te3) OX=479436 GN=Vpar_1356 PE=4 SV=1	34	415360	1757700	8	8	5	1	6	1	6	0	4	11.5	11.5	7	76.685	6.3755	1	6	8
1277	D1BQQ8|D1BQQ8	tr|D1BQQ8|D1BQQ8_VEIPT	tr|D1BQQ8|D1BQQ8_VEIPT Uncharacterized protein OS=Veillonella parvula (strain ATCC 10790 / DSM 2008 / CCUG 5123 / JCM 12972 / NCTC 11810 / Te3) OX=479436 GN=Vpar_0183 PE=4 SV=1	26	376980	20709000	10	10	10	1	10	1	10	1	10	24.2	24.2	24.2	44.448	17.722	0	15	15
1278	D1BMB8|D1BMB8	tr|D1BMB8|D1BMB8_VEIPT	tr|D1BMB8|D1BMB8_VEIPT Sulphate transporter OS=Veillonella parvula (strain ATCC 10790 / DSM 2008 / CCUG 5123 / JCM 12972 / NCTC 11810 / Te3) OX=479436 GN=Vpar_0844 PE=3 SV=1	15	354510	152700	7	7	7	1	1	1	1	1	1	8.8	8.8	8.8	59.798	4.5907	1	0	8
1279	E1L9S9|E1L9S9	tr|E1L9S9|E1L9S9_9FIRM	tr|E1L9S9|E1L9S9_9FIRM Glutamine--fructose-6-phosphate aminotransferase [isomerizing] OS=Veillonella atypica ACS-134-V-Col7a OX=866778 GN=glmS PE=3 SV=1	40	354410	327620	5	5	1	2	3	2	3	1	0	9.2	9.2	1.5	66.75	5.3951	2	4	6
1280	D1BP90|D1BP90	tr|D1BP90|D1BP90_VEIPT	tr|D1BP90|D1BP90_VEIPT Polynucleotide adenylyltransferase/metal dependent phosphohydrolase OS=Veillonella parvula (strain ATCC 10790 / DSM 2008 / CCUG 5123 / JCM 12972 / NCTC 11810 / Te3) OX=479436 GN=Vpar_1521 PE=3 SV=1	34	334560	625570	6	4	4	1	3	0	2	0	2	10.2	6.6	6.6	53.452	3.3911	1	6	11
1281	D1BQ40|D1BQ40	tr|D1BQ40|D1BQ40_VEIPT	tr|D1BQ40|D1BQ40_VEIPT Uncharacterized protein OS=Veillonella parvula (strain ATCC 10790 / DSM 2008 / CCUG 5123 / JCM 12972 / NCTC 11810 / Te3) OX=479436 GN=Vpar_1822 PE=4 SV=1	40	330950	217760	3	3	3	2	2	2	2	2	2	5.4	5.4	5.4	77.658	2.0925	0	2	2
1282	D1BLL9|D1BLL9	tr|D1BLL9|D1BLL9_VEIPT	tr|D1BLL9|D1BLL9_VEIPT SpoIID/LytB domain protein OS=Veillonella parvula (strain ATCC 10790 / DSM 2008 / CCUG 5123 / JCM 12972 / NCTC 11810 / Te3) OX=479436 GN=Vpar_0593 PE=4 SV=1	43	321980	17089000	3	3	3	1	2	1	2	1	2	5.9	5.9	5.9	62.553	2.7096	1	6	8
1283	D1BL76|D1BL76	tr|D1BL76|D1BL76_VEIPT	tr|D1BL76|D1BL76_VEIPT Type III restriction protein res subunit OS=Veillonella parvula (strain ATCC 10790 / DSM 2008 / CCUG 5123 / JCM 12972 / NCTC 11810 / Te3) OX=479436 GN=Vpar_0449 PE=4 SV=1	68	316760	6397800	19	19	19	1	18	1	18	1	18	18.9	18.9	18.9	112.83	31.24	1	28	29
1284	D1BLD1|D1BLD1	tr|D1BLD1|D1BLD1_VEIPT	tr|D1BLD1|D1BLD1_VEIPT Uncharacterized protein OS=Veillonella parvula (strain ATCC 10790 / DSM 2008 / CCUG 5123 / JCM 12972 / NCTC 11810 / Te3) OX=479436 GN=Vpar_0505 PE=4 SV=1	18	294570	588120	4	2	2	1	3	1	1	1	1	7.2	4.3	4.3	49.148	2.5864	0	2	5
1285	D1BMG7|D1BMG7	tr|D1BMG7|D1BMG7_VEIPT	tr|D1BMG7|D1BMG7_VEIPT ABC transporter related protein OS=Veillonella parvula (strain ATCC 10790 / DSM 2008 / CCUG 5123 / JCM 12972 / NCTC 11810 / Te3) OX=479436 GN=Vpar_0893 PE=4 SV=1	32	263670	2301400	8	8	7	1	6	1	6	0	5	13.2	13.2	12	64.397	5.8724	1	6	9
1286	D1BPW0|D1BPW0	tr|D1BPW0|D1BPW0_VEIPT	tr|D1BPW0|D1BPW0_VEIPT ATPase associated with various cellular activities AAA_5 OS=Veillonella parvula (strain ATCC 10790 / DSM 2008 / CCUG 5123 / JCM 12972 / NCTC 11810 / Te3) OX=479436 GN=Vpar_1741 PE=4 SV=1	42	224770	48357000	18	18	18	1	18	1	18	1	18	25.4	25.4	25.4	84.669	65.76	0	91	91
1287	D1BQJ0|D1BQJ0	tr|D1BQJ0|D1BQJ0_VEIPT	tr|D1BQJ0|D1BQJ0_VEIPT N-6 DNA methylase OS=Veillonella parvula (strain ATCC 10790 / DSM 2008 / CCUG 5123 / JCM 12972 / NCTC 11810 / Te3) OX=479436 GN=Vpar_0114 PE=4 SV=1	38	223000	1647100	5	5	5	1	4	1	4	1	4	8.7	8.7	8.7	66.452	2.4823	0	3	4
1288	D1BLE5|D1BLE5;E1LEA9|E1LEA9	tr|D1BLE5|D1BLE5_VEIPT	tr|D1BLE5|D1BLE5_VEIPT NAGPA domain-containing protein OS=Veillonella parvula (strain ATCC 10790 / DSM 2008 / CCUG 5123 / JCM 12972 / NCTC 11810 / Te3) OX=479436 GN=Vpar_0519 PE=4 SV=1	27	210890	8463000	7	7	7	1	7	1	7	1	7	18.6	18.6	18.6	48.022	10.795	0	7	7
1289	E1LBR5|E1LBR5	tr|E1LBR5|E1LBR5_9FIRM	tr|E1LBR5|E1LBR5_9FIRM CRISPR-associated endonuclease Cas9 OS=Veillonella atypica ACS-134-V-Col7a OX=866778 GN=csn1 PE=3 SV=1	90	201720	506320	3	3	3	1	1	1	1	1	1	2	2	2	160.62	-2	0	1	1
1290	E1L9E2|E1L9E2	tr|E1L9E2|E1L9E2_9FIRM	tr|E1L9E2|E1L9E2_9FIRM UDP-N-acetylmuramoyl-L-alanyl-D-glutamate--2,6-diaminopimelate ligase OS=Veillonella atypica ACS-134-V-Col7a OX=866778 GN=murE PE=3 SV=1	25	201470	12475000	4	1	1	2	3	1	0	1	0	6.7	1.8	1.8	54.151	-2	1	6	7
1291	D1BMM9|D1BMM9;E1LAN6|E1LAN6	tr|D1BMM9|D1BMM9_VEIPT;tr|E1LAN6|E1LAN6_9FIRM	tr|D1BMM9|D1BMM9_VEIPT Pyruvate dehydrogenase [ubiquinone] OS=Veillonella parvula (strain ATCC 10790 / DSM 2008 / CCUG 5123 / JCM 12972 / NCTC 11810 / Te3) OX=479436 GN=poxB PE=3 SV=1;tr|E1LAN6|E1LAN6_9FIRM Thiamine pyrophosphate enzyme, N-terminal TPP bin	33	196120	623640	4	4	4	1	3	1	3	1	3	6.6	6.6	6.6	64.024	3.0468	1	3	5
1292	D1BQR0|D1BQR0	tr|D1BQR0|D1BQR0_VEIPT	tr|D1BQR0|D1BQR0_VEIPT Restriction endonuclease OS=Veillonella parvula (strain ATCC 10790 / DSM 2008 / CCUG 5123 / JCM 12972 / NCTC 11810 / Te3) OX=479436 GN=Vpar_0185 PE=4 SV=1	24	186240	9673100	7	7	7	1	7	1	7	1	7	17.4	17.4	17.4	44.849	11.002	0	15	15
