# Supplementary material for: The Gut Commensal Bacteria Veillonella parvula-Induced Neutrophil Activation Mediates Antitumor Activity
Source: Research Square preprint supplement (doi:10.21203/rs.3.rs-7615171/v1), 2025-10-16
Supplement: Supplementary file 3 [file 8e7b0815a1eee651f286a03f.xlsx]

## Sheet: Supp Table 3b
Supplementary Table 3b. List of proteins observed only in VP
No.	Protein IDs	Majority protein IDs	Fasta headers	iBAQ peptides	iBAQ-VP	Peptides	Razor + unique peptides	Unique peptides	Peptides-VP	Razor + unique peptides-VP	Unique peptides-VP	Sequence coverage [%]	Unique + razor sequence coverage [%]	Unique sequence coverage [%]	Mol. weight [kDa]	Score	MS/MS count-VP	MS/MS count
1	tr|D1BNG1|D1BNG1_VEIPT;REV__tr|E1LA11|E1LA11_9FIRM;REV__tr|D1BQU3|D1BQU3_VEIPT	tr|D1BNG1|D1BNG1_VEIPT	tr|D1BNG1|D1BNG1_VEIPT Anion transporter OS=Veillonella parvula (strain ATCC 10790 / DSM 2008 / CCUG 5123 / JCM 12972 / NCTC 11810 / Te3) OX=479436 GN=Vpar_1238 PE=4 SV=1	6	2551400000	3	3	3	3	3	3	8.3	8.3	8.3	44.709	22.012	118	118
2	tr|D1BQL8|D1BQL8_VEIPT;tr|E1LAY0|E1LAY0_9FIRM	tr|D1BQL8|D1BQL8_VEIPT	tr|D1BQL8|D1BQL8_VEIPT Ferritin Dps family protein OS=Veillonella parvula (strain ATCC 10790 / DSM 2008 / CCUG 5123 / JCM 12972 / NCTC 11810 / Te3) OX=479436 GN=Vpar_0143 PE=3 SV=1	9	506320000	6	6	6	6	6	6	50.7	50.7	50.7	16.826	131.77	147	147
3	tr|D1BQP8|D1BQP8_VEIPT	tr|D1BQP8|D1BQP8_VEIPT	tr|D1BQP8|D1BQP8_VEIPT Uncharacterized protein OS=Veillonella parvula (strain ATCC 10790 / DSM 2008 / CCUG 5123 / JCM 12972 / NCTC 11810 / Te3) OX=479436 GN=Vpar_0173 PE=4 SV=1	4	499460000	1	1	1	1	1	1	10.7	10.7	10.7	9.7311	3.0817	15	15
4	tr|D1BQB9|D1BQB9_VEIPT	tr|D1BQB9|D1BQB9_VEIPT	tr|D1BQB9|D1BQB9_VEIPT Uncharacterized protein OS=Veillonella parvula (strain ATCC 10790 / DSM 2008 / CCUG 5123 / JCM 12972 / NCTC 11810 / Te3) OX=479436 GN=Vpar_0043 PE=4 SV=1	13	451120000	10	6	6	10	6	6	40.2	25.7	25.7	24.84	41.346	306	308
5	tr|D1BQC5|D1BQC5_VEIPT	tr|D1BQC5|D1BQC5_VEIPT	tr|D1BQC5|D1BQC5_VEIPT Uncharacterized protein OS=Veillonella parvula (strain ATCC 10790 / DSM 2008 / CCUG 5123 / JCM 12972 / NCTC 11810 / Te3) OX=479436 GN=Vpar_0049 PE=4 SV=1	15	412770000	10	10	3	10	10	3	58.9	58.9	23.4	24.78	251.72	350	357
6	tr|D1BQC3|D1BQC3_VEIPT	tr|D1BQC3|D1BQC3_VEIPT	tr|D1BQC3|D1BQC3_VEIPT Uncharacterized protein OS=Veillonella parvula (strain ATCC 10790 / DSM 2008 / CCUG 5123 / JCM 12972 / NCTC 11810 / Te3) OX=479436 GN=Vpar_0047 PE=4 SV=1	15	402820000	9	2	2	9	2	2	45.5	9.9	9.9	24.661	11.502	346	353
7	tr|D1BQF5|D1BQF5_VEIPT	tr|D1BQF5|D1BQF5_VEIPT	tr|D1BQF5|D1BQF5_VEIPT Electron transfer flavoprotein alpha/beta-subunit OS=Veillonella parvula (strain ATCC 10790 / DSM 2008 / CCUG 5123 / JCM 12972 / NCTC 11810 / Te3) OX=479436 GN=Vpar_0079 PE=4 SV=1	21	299750000	15	15	10	15	15	10	53.2	53.2	36.2	35.944	71.447	61	65
8	tr|D1BLZ6|D1BLZ6_VEIPT;tr|E1LCI6|E1LCI6_9FIRM	tr|D1BLZ6|D1BLZ6_VEIPT;tr|E1LCI6|E1LCI6_9FIRM	tr|D1BLZ6|D1BLZ6_VEIPT Anaerobic c4-dicarboxylate antiporter, Dcu family OS=Veillonella parvula (strain ATCC 10790 / DSM 2008 / CCUG 5123 / JCM 12972 / NCTC 11810 / Te3) OX=479436 GN=Vpar_0721 PE=3 SV=1;tr|E1LCI6|E1LCI6_9FIRM Transporter, anaerobic C4-dica	11	238470000	5	5	5	5	5	5	9.8	9.8	9.8	48.147	39.09	15	27
9	tr|D1BLA0|D1BLA0_VEIPT	tr|D1BLA0|D1BLA0_VEIPT	tr|D1BLA0|D1BLA0_VEIPT Uncharacterized protein OS=Veillonella parvula (strain ATCC 10790 / DSM 2008 / CCUG 5123 / JCM 12972 / NCTC 11810 / Te3) OX=479436 GN=Vpar_0473 PE=4 SV=1	12	213470000	7	7	6	7	7	6	32.5	32.5	29.2	25.884	42.678	37	37
10	tr|D1BPB3|D1BPB3_VEIPT	tr|D1BPB3|D1BPB3_VEIPT	tr|D1BPB3|D1BPB3_VEIPT UPF0237 protein Vpar_1544 OS=Veillonella parvula (strain ATCC 10790 / DSM 2008 / CCUG 5123 / JCM 12972 / NCTC 11810 / Te3) OX=479436 GN=Vpar_1544 PE=3 SV=1	4	186970000	2	2	2	2	2	2	23.1	23.1	23.1	9.8225	6.8915	28	37
11	tr|D1BPC7|D1BPC7_VEIPT	tr|D1BPC7|D1BPC7_VEIPT	tr|D1BPC7|D1BPC7_VEIPT Uncharacterized protein OS=Veillonella parvula (strain ATCC 10790 / DSM 2008 / CCUG 5123 / JCM 12972 / NCTC 11810 / Te3) OX=479436 GN=Vpar_1558 PE=4 SV=1	14	163180000	6	6	6	6	6	6	20.1	20.1	20.1	34.828	42.487	23	23
12	tr|D1BL39|D1BL39_VEIPT	tr|D1BL39|D1BL39_VEIPT	tr|D1BL39|D1BL39_VEIPT Uncharacterized protein OS=Veillonella parvula (strain ATCC 10790 / DSM 2008 / CCUG 5123 / JCM 12972 / NCTC 11810 / Te3) OX=479436 GN=Vpar_0412 PE=4 SV=1	18	162470000	12	12	12	12	12	12	41.1	41.1	41.1	34.391	55.362	69	69
13	tr|D1BQB5|D1BQB5_VEIPT	tr|D1BQB5|D1BQB5_VEIPT	tr|D1BQB5|D1BQB5_VEIPT Uncharacterized protein OS=Veillonella parvula (strain ATCC 10790 / DSM 2008 / CCUG 5123 / JCM 12972 / NCTC 11810 / Te3) OX=479436 GN=Vpar_0039 PE=4 SV=1	2	162220000	1	1	1	1	1	1	16.5	16.5	16.5	8.9607	110.64	11	11
14	tr|D1BL18|D1BL18_VEIPT	tr|D1BL18|D1BL18_VEIPT	tr|D1BL18|D1BL18_VEIPT Polysaccharide deacetylase OS=Veillonella parvula (strain ATCC 10790 / DSM 2008 / CCUG 5123 / JCM 12972 / NCTC 11810 / Te3) OX=479436 GN=Vpar_0391 PE=4 SV=1	17	146750000	11	11	9	11	11	9	46.4	46.4	37.1	30.016	133.6	67	194
15	tr|D1BP94|D1BP94_VEIPT;tr|E1LAK4|E1LAK4_9FIRM	tr|D1BP94|D1BP94_VEIPT	tr|D1BP94|D1BP94_VEIPT Transcriptional regulator, Crp/Fnr family OS=Veillonella parvula (strain ATCC 10790 / DSM 2008 / CCUG 5123 / JCM 12972 / NCTC 11810 / Te3) OX=479436 GN=Vpar_1525 PE=4 SV=1	18	135310000	9	9	9	9	9	9	39	39	39	27.483	44.748	24	86
16	tr|D1BR49|D1BR49_VEIPT	tr|D1BR49|D1BR49_VEIPT	tr|D1BR49|D1BR49_VEIPT Periplasmic binding protein OS=Veillonella parvula (strain ATCC 10790 / DSM 2008 / CCUG 5123 / JCM 12972 / NCTC 11810 / Te3) OX=479436 GN=Vpar_0328 PE=1 SV=1	20	133960000	13	13	13	13	13	13	45.1	45.1	45.1	41.333	206.38	101	101
17	tr|D1BLH4|D1BLH4_VEIPT	tr|D1BLH4|D1BLH4_VEIPT	tr|D1BLH4|D1BLH4_VEIPT OstA family protein OS=Veillonella parvula (strain ATCC 10790 / DSM 2008 / CCUG 5123 / JCM 12972 / NCTC 11810 / Te3) OX=479436 GN=Vpar_0548 PE=4 SV=1	11	132970000	6	6	6	6	6	6	23.4	23.4	23.4	25.232	14.663	18	24
18	tr|D1BMG6|D1BMG6_VEIPT	tr|D1BMG6|D1BMG6_VEIPT	tr|D1BMG6|D1BMG6_VEIPT Thiol peroxidase OS=Veillonella parvula (strain ATCC 10790 / DSM 2008 / CCUG 5123 / JCM 12972 / NCTC 11810 / Te3) OX=479436 GN=tpx PE=3 SV=1	9	125660000	8	8	4	8	8	4	69.6	69.6	35.7	18.606	65.137	22	34
19	tr|D1BNR8|D1BNR8_VEIPT	tr|D1BNR8|D1BNR8_VEIPT	tr|D1BNR8|D1BNR8_VEIPT Phosphotransferase system lactose/cellobiose-specific IIB subunit OS=Veillonella parvula (strain ATCC 10790 / DSM 2008 / CCUG 5123 / JCM 12972 / NCTC 11810 / Te3) OX=479436 GN=Vpar_1347 PE=4 SV=1	6	124330000	4	3	3	4	3	3	36.3	27.5	27.5	9.9274	5.401	13	23
20	tr|D1BL07|D1BL07_VEIPT	tr|D1BL07|D1BL07_VEIPT	tr|D1BL07|D1BL07_VEIPT Uncharacterized protein OS=Veillonella parvula (strain ATCC 10790 / DSM 2008 / CCUG 5123 / JCM 12972 / NCTC 11810 / Te3) OX=479436 GN=Vpar_0380 PE=4 SV=1	10	117750000	6	6	6	6	6	6	31.1	31.1	31.1	23.197	83.353	49	89
21	tr|D1BLA8|D1BLA8_VEIPT	tr|D1BLA8|D1BLA8_VEIPT	tr|D1BLA8|D1BLA8_VEIPT Uncharacterized protein OS=Veillonella parvula (strain ATCC 10790 / DSM 2008 / CCUG 5123 / JCM 12972 / NCTC 11810 / Te3) OX=479436 GN=Vpar_0482 PE=4 SV=1	3	83482000	1	1	1	1	1	1	7.7	7.7	7.7	19.794	8.932	4	4
22	tr|D1BQ87|D1BQ87_VEIPT	tr|D1BQ87|D1BQ87_VEIPT	tr|D1BQ87|D1BQ87_VEIPT Efflux transporter, RND family, MFP subunit OS=Veillonella parvula (strain ATCC 10790 / DSM 2008 / CCUG 5123 / JCM 12972 / NCTC 11810 / Te3) OX=479436 GN=Vpar_0011 PE=3 SV=1	15	83271000	10	10	9	9	9	8	42.1	42.1	39	37.04	66.086	20	41
23	tr|D1BLA5|D1BLA5_VEIPT	tr|D1BLA5|D1BLA5_VEIPT	tr|D1BLA5|D1BLA5_VEIPT Cytochrome d ubiquinol oxidase, subunit II OS=Veillonella parvula (strain ATCC 10790 / DSM 2008 / CCUG 5123 / JCM 12972 / NCTC 11810 / Te3) OX=479436 GN=Vpar_0478 PE=3 SV=1	4	77039000	2	2	2	2	2	2	4.4	4.4	4.4	37.599	2.6023	4	4
24	tr|D1BR12|D1BR12_VEIPT	tr|D1BR12|D1BR12_VEIPT	tr|D1BR12|D1BR12_VEIPT XdhC_CoxI domain-containing protein OS=Veillonella parvula (strain ATCC 10790 / DSM 2008 / CCUG 5123 / JCM 12972 / NCTC 11810 / Te3) OX=479436 GN=Vpar_0291 PE=4 SV=1	7	76763000	2	2	2	2	2	2	17.3	17.3	17.3	11.504	3.5743	11	11
25	tr|D1BQ31|D1BQ31_VEIPT	tr|D1BQ31|D1BQ31_VEIPT	tr|D1BQ31|D1BQ31_VEIPT Uncharacterized protein OS=Veillonella parvula (strain ATCC 10790 / DSM 2008 / CCUG 5123 / JCM 12972 / NCTC 11810 / Te3) OX=479436 GN=Vpar_1813 PE=4 SV=1	12	73807000	10	10	10	10	10	10	62.6	62.6	62.6	21.385	96.477	44	44
26	tr|D1BQL2|D1BQL2_VEIPT	tr|D1BQL2|D1BQL2_VEIPT	tr|D1BQL2|D1BQL2_VEIPT Copper amine oxidase domain protein OS=Veillonella parvula (strain ATCC 10790 / DSM 2008 / CCUG 5123 / JCM 12972 / NCTC 11810 / Te3) OX=479436 GN=Vpar_0136 PE=4 SV=1	15	71526000	9	9	8	9	9	8	40.3	40.3	36.6	26.753	68.323	31	33
27	tr|D1BQ96|D1BQ96_VEIPT	tr|D1BQ96|D1BQ96_VEIPT	tr|D1BQ96|D1BQ96_VEIPT O-antigen polymerase OS=Veillonella parvula (strain ATCC 10790 / DSM 2008 / CCUG 5123 / JCM 12972 / NCTC 11810 / Te3) OX=479436 GN=Vpar_0020 PE=4 SV=1	13	69635000	3	3	3	3	3	3	9.4	9.4	9.4	44.324	139.64	26	30
28	tr|D1BQE5|D1BQE5_VEIPT	tr|D1BQE5|D1BQE5_VEIPT	tr|D1BQE5|D1BQE5_VEIPT ABC transporter related protein OS=Veillonella parvula (strain ATCC 10790 / DSM 2008 / CCUG 5123 / JCM 12972 / NCTC 11810 / Te3) OX=479436 GN=Vpar_0069 PE=4 SV=1	18	68414000	11	11	9	11	11	9	39.9	39.9	34.9	31.185	17.141	24	24
29	tr|D1BLA6|D1BLA6_VEIPT	tr|D1BLA6|D1BLA6_VEIPT	tr|D1BLA6|D1BLA6_VEIPT Sigma 54 interacting domain protein OS=Veillonella parvula (strain ATCC 10790 / DSM 2008 / CCUG 5123 / JCM 12972 / NCTC 11810 / Te3) OX=479436 GN=Vpar_0479 PE=4 SV=1	57	67038000	7	7	7	5	5	5	5.6	5.6	5.6	132.82	17.16	11	14
30	tr|D1BQD6|D1BQD6_VEIPT	tr|D1BQD6|D1BQD6_VEIPT	tr|D1BQD6|D1BQD6_VEIPT TonB family protein OS=Veillonella parvula (strain ATCC 10790 / DSM 2008 / CCUG 5123 / JCM 12972 / NCTC 11810 / Te3) OX=479436 GN=Vpar_0060 PE=3 SV=1	10	66719000	5	5	4	5	5	4	24.5	24.5	21.3	25.711	9.6664	21	21
31	tr|D1BNF5|D1BNF5_VEIPT	tr|D1BNF5|D1BNF5_VEIPT	tr|D1BNF5|D1BNF5_VEIPT Uncharacterized protein OS=Veillonella parvula (strain ATCC 10790 / DSM 2008 / CCUG 5123 / JCM 12972 / NCTC 11810 / Te3) OX=479436 GN=Vpar_1232 PE=4 SV=1	9	61295000	7	7	7	6	6	6	39	39	39	20.904	68.518	77	82
32	tr|D1BLC5|D1BLC5_VEIPT	tr|D1BLC5|D1BLC5_VEIPT	tr|D1BLC5|D1BLC5_VEIPT Septum formation initiator OS=Veillonella parvula (strain ATCC 10790 / DSM 2008 / CCUG 5123 / JCM 12972 / NCTC 11810 / Te3) OX=479436 GN=Vpar_0499 PE=4 SV=1	9	55673000	8	8	6	6	6	5	57.3	57.3	45.5	13.041	168.23	14	26
33	tr|D1BQP6|D1BQP6_VEIPT	tr|D1BQP6|D1BQP6_VEIPT	tr|D1BQP6|D1BQP6_VEIPT ABC transporter related protein OS=Veillonella parvula (strain ATCC 10790 / DSM 2008 / CCUG 5123 / JCM 12972 / NCTC 11810 / Te3) OX=479436 GN=Vpar_0171 PE=4 SV=1	23	55340000	9	9	9	9	9	9	16.8	16.8	16.8	66.197	49.659	29	29
34	tr|D1BMG3|D1BMG3_VEIPT	tr|D1BMG3|D1BMG3_VEIPT	tr|D1BMG3|D1BMG3_VEIPT Uncharacterized protein OS=Veillonella parvula (strain ATCC 10790 / DSM 2008 / CCUG 5123 / JCM 12972 / NCTC 11810 / Te3) OX=479436 GN=Vpar_0889 PE=4 SV=1	10	54507000	6	6	3	6	6	3	29.3	29.3	14.3	16.499	4.8662	11	11
35	tr|D1BP99|D1BP99_VEIPT	tr|D1BP99|D1BP99_VEIPT	tr|D1BP99|D1BP99_VEIPT Uncharacterized protein OS=Veillonella parvula (strain ATCC 10790 / DSM 2008 / CCUG 5123 / JCM 12972 / NCTC 11810 / Te3) OX=479436 GN=Vpar_1530 PE=4 SV=1	15	53223000	9	9	9	9	9	9	37.4	37.4	37.4	33.311	21.212	28	30
36	tr|D1BNL5|D1BNL5_VEIPT	tr|D1BNL5|D1BNL5_VEIPT	tr|D1BNL5|D1BNL5_VEIPT Hydro-lyase, Fe-S type, tartrate/fumarate subfamily, alpha subunit OS=Veillonella parvula (strain ATCC 10790 / DSM 2008 / CCUG 5123 / JCM 12972 / NCTC 11810 / Te3) OX=479436 GN=Vpar_1292 PE=3 SV=1	16	51291000	8	8	7	8	8	7	25.7	25.7	22.7	32.582	18.049	19	26
37	tr|D1BNW6|D1BNW6_VEIPT	tr|D1BNW6|D1BNW6_VEIPT	tr|D1BNW6|D1BNW6_VEIPT Cupin 2 conserved barrel domain protein OS=Veillonella parvula (strain ATCC 10790 / DSM 2008 / CCUG 5123 / JCM 12972 / NCTC 11810 / Te3) OX=479436 GN=Vpar_1395 PE=4 SV=1	9	49044000	4	4	2	4	4	2	39.8	39.8	20.3	13.01	17.002	53	53
38	tr|D1BKZ1|D1BKZ1_VEIPT	tr|D1BKZ1|D1BKZ1_VEIPT	tr|D1BKZ1|D1BKZ1_VEIPT Uncharacterized protein OS=Veillonella parvula (strain ATCC 10790 / DSM 2008 / CCUG 5123 / JCM 12972 / NCTC 11810 / Te3) OX=479436 GN=Vpar_0364 PE=4 SV=1	7	48157000	4	4	4	3	3	3	25.7	25.7	25.7	16.726	5.8689	8	12
39	tr|D1BNJ5|D1BNJ5_VEIPT	tr|D1BNJ5|D1BNJ5_VEIPT	tr|D1BNJ5|D1BNJ5_VEIPT Diaminopropionate ammonia-lyase OS=Veillonella parvula (strain ATCC 10790 / DSM 2008 / CCUG 5123 / JCM 12972 / NCTC 11810 / Te3) OX=479436 GN=Vpar_1272 PE=4 SV=1	21	47636000	11	11	11	10	10	10	29	29	29	44.195	71.16	78	111
40	tr|D1BNJ2|D1BNJ2_VEIPT	tr|D1BNJ2|D1BNJ2_VEIPT	tr|D1BNJ2|D1BNJ2_VEIPT Carbamate kinase OS=Veillonella parvula (strain ATCC 10790 / DSM 2008 / CCUG 5123 / JCM 12972 / NCTC 11810 / Te3) OX=479436 GN=Vpar_1269 PE=3 SV=1	15	46592000	9	9	9	9	9	9	31.5	31.5	31.5	33.356	14.004	31	47
41	tr|D1BR35|D1BR35_VEIPT	tr|D1BR35|D1BR35_VEIPT	tr|D1BR35|D1BR35_VEIPT Phosphomethylpyrimidine kinase OS=Veillonella parvula (strain ATCC 10790 / DSM 2008 / CCUG 5123 / JCM 12972 / NCTC 11810 / Te3) OX=479436 GN=Vpar_0314 PE=3 SV=1	13	45578000	7	7	6	7	7	6	32.5	32.5	28.9	29.711	20.99	34	36
42	tr|D1BQ23|D1BQ23_VEIPT	tr|D1BQ23|D1BQ23_VEIPT	tr|D1BQ23|D1BQ23_VEIPT CRISPR system Cms protein Csm2 OS=Veillonella parvula (strain ATCC 10790 / DSM 2008 / CCUG 5123 / JCM 12972 / NCTC 11810 / Te3) OX=479436 GN=Vpar_1805 PE=3 SV=1	12	44023000	8	8	8	8	8	8	45.9	45.9	45.9	19.866	92.7	38	38
43	tr|D1BR54|D1BR54_VEIPT	tr|D1BR54|D1BR54_VEIPT	tr|D1BR54|D1BR54_VEIPT Uncharacterized protein OS=Veillonella parvula (strain ATCC 10790 / DSM 2008 / CCUG 5123 / JCM 12972 / NCTC 11810 / Te3) OX=479436 GN=Vpar_0333 PE=4 SV=1	25	39703000	13	13	13	13	13	13	41.3	41.3	41.3	39.1	67.787	27	27
44	tr|D1BL96|D1BL96_VEIPT	tr|D1BL96|D1BL96_VEIPT	tr|D1BL96|D1BL96_VEIPT Propeptide PepSY amd peptidase M4 OS=Veillonella parvula (strain ATCC 10790 / DSM 2008 / CCUG 5123 / JCM 12972 / NCTC 11810 / Te3) OX=479436 GN=Vpar_0469 PE=4 SV=1	14	37353000	7	7	6	7	7	6	36.2	36.2	32.6	23.999	12.486	17	17
45	tr|D1BR05|D1BR05_VEIPT	tr|D1BR05|D1BR05_VEIPT	tr|D1BR05|D1BR05_VEIPT Molybdopterin dehydrogenase FAD-binding protein OS=Veillonella parvula (strain ATCC 10790 / DSM 2008 / CCUG 5123 / JCM 12972 / NCTC 11810 / Te3) OX=479436 GN=Vpar_0284 PE=4 SV=1	18	36645000	10	10	10	7	7	7	47.7	47.7	47.7	28.755	24.975	17	68
46	tr|D1BR72|D1BR72_VEIPT	tr|D1BR72|D1BR72_VEIPT	tr|D1BR72|D1BR72_VEIPT Uncharacterized protein OS=Veillonella parvula (strain ATCC 10790 / DSM 2008 / CCUG 5123 / JCM 12972 / NCTC 11810 / Te3) OX=479436 GN=Vpar_0351 PE=4 SV=1	13	35818000	9	9	8	9	9	8	41.7	41.7	38.1	24.494	84.301	10	21
47	tr|D1BMJ1|D1BMJ1_VEIPT;tr|E1LAC9|E1LAC9_9FIRM	tr|D1BMJ1|D1BMJ1_VEIPT	tr|D1BMJ1|D1BMJ1_VEIPT Transcription antitermination protein NusB OS=Veillonella parvula (strain ATCC 10790 / DSM 2008 / CCUG 5123 / JCM 12972 / NCTC 11810 / Te3) OX=479436 GN=nusB PE=3 SV=1	7	35573000	3	3	3	3	3	3	28.4	28.4	28.4	15.236	14.161	7	7
48	tr|D1BL41|D1BL41_VEIPT;tr|E1LB90|E1LB90_9FIRM	tr|D1BL41|D1BL41_VEIPT;tr|E1LB90|E1LB90_9FIRM	tr|D1BL41|D1BL41_VEIPT Endoribonuclease L-PSP OS=Veillonella parvula (strain ATCC 10790 / DSM 2008 / CCUG 5123 / JCM 12972 / NCTC 11810 / Te3) OX=479436 GN=Vpar_0414 PE=3 SV=1;tr|E1LB90|E1LB90_9FIRM Putative endoribonuclease L-PSP OS=Veillonella atypica AC	7	35436000	3	3	3	3	3	3	22.8	22.8	22.8	12.929	5.2119	3	5
49	tr|D1BQ91|D1BQ91_VEIPT	tr|D1BQ91|D1BQ91_VEIPT	tr|D1BQ91|D1BQ91_VEIPT Sulfatase OS=Veillonella parvula (strain ATCC 10790 / DSM 2008 / CCUG 5123 / JCM 12972 / NCTC 11810 / Te3) OX=479436 GN=Vpar_0015 PE=4 SV=1	34	33905000	13	13	13	13	13	13	23.3	23.3	23.3	75.898	323.31	60	89
50	tr|D1BMR9|D1BMR9_VEIPT	tr|D1BMR9|D1BMR9_VEIPT	tr|D1BMR9|D1BMR9_VEIPT Uncharacterized protein OS=Veillonella parvula (strain ATCC 10790 / DSM 2008 / CCUG 5123 / JCM 12972 / NCTC 11810 / Te3) OX=479436 GN=Vpar_0995 PE=4 SV=1	5	33774000	3	3	3	3	3	3	13	13	13	15.657	6.8873	7	14
51	tr|D1BM80|D1BM80_VEIPT	tr|D1BM80|D1BM80_VEIPT	tr|D1BM80|D1BM80_VEIPT Transketolase central region OS=Veillonella parvula (strain ATCC 10790 / DSM 2008 / CCUG 5123 / JCM 12972 / NCTC 11810 / Te3) OX=479436 GN=Vpar_0806 PE=4 SV=1	17	33205000	6	6	5	6	6	5	23.2	23.2	21.3	32.544	16.267	18	23
52	tr|D1BPK7|D1BPK7_VEIPT	tr|D1BPK7|D1BPK7_VEIPT	tr|D1BPK7|D1BPK7_VEIPT Pseudouridine synthase OS=Veillonella parvula (strain ATCC 10790 / DSM 2008 / CCUG 5123 / JCM 12972 / NCTC 11810 / Te3) OX=479436 GN=Vpar_1638 PE=3 SV=1	17	32657000	2	2	2	2	2	2	8	8	8	32.771	6.8691	2	2
53	tr|D1BQA2|D1BQA2_VEIPT	tr|D1BQA2|D1BQA2_VEIPT	tr|D1BQA2|D1BQA2_VEIPT DUF4422 domain-containing protein OS=Veillonella parvula (strain ATCC 10790 / DSM 2008 / CCUG 5123 / JCM 12972 / NCTC 11810 / Te3) OX=479436 GN=Vpar_0026 PE=4 SV=1	16	32334000	8	8	8	8	8	8	37.2	37.2	37.2	29.99	58.061	66	69
54	tr|D1BP86|D1BP86_VEIPT	tr|D1BP86|D1BP86_VEIPT	tr|D1BP86|D1BP86_VEIPT Hydrogenase accessory protein HypB OS=Veillonella parvula (strain ATCC 10790 / DSM 2008 / CCUG 5123 / JCM 12972 / NCTC 11810 / Te3) OX=479436 GN=Vpar_1517 PE=3 SV=1	13	31779000	8	8	7	6	6	6	31.3	31.3	28.6	24.212	11.825	14	35
55	tr|D1BN51|D1BN51_VEIPT;tr|E1L961|E1L961_9FIRM	tr|D1BN51|D1BN51_VEIPT	tr|D1BN51|D1BN51_VEIPT Desulfoferrodoxin ferrous iron-binding region OS=Veillonella parvula (strain ATCC 10790 / DSM 2008 / CCUG 5123 / JCM 12972 / NCTC 11810 / Te3) OX=479436 GN=Vpar_1127 PE=3 SV=1	6	31671000	3	3	3	3	3	3	27.1	27.1	27.1	13.879	5.8335	7	8
56	tr|D1BL40|D1BL40_VEIPT	tr|D1BL40|D1BL40_VEIPT	tr|D1BL40|D1BL40_VEIPT Uncharacterized protein OS=Veillonella parvula (strain ATCC 10790 / DSM 2008 / CCUG 5123 / JCM 12972 / NCTC 11810 / Te3) OX=479436 GN=Vpar_0413 PE=4 SV=1	16	30148000	10	10	10	10	10	10	57.5	57.5	57.5	28.209	106.65	46	50
57	tr|D1BN34|D1BN34_VEIPT	tr|D1BN34|D1BN34_VEIPT	tr|D1BN34|D1BN34_VEIPT Polypeptide-transport-associated domain protein FtsQ-type OS=Veillonella parvula (strain ATCC 10790 / DSM 2008 / CCUG 5123 / JCM 12972 / NCTC 11810 / Te3) OX=479436 GN=Vpar_1110 PE=4 SV=1	16	28102000	4	4	4	4	4	4	22.9	22.9	22.9	32.139	32.225	36	39
58	tr|D1BQE4|D1BQE4_VEIPT	tr|D1BQE4|D1BQE4_VEIPT	tr|D1BQE4|D1BQE4_VEIPT Transport system permease protein OS=Veillonella parvula (strain ATCC 10790 / DSM 2008 / CCUG 5123 / JCM 12972 / NCTC 11810 / Te3) OX=479436 GN=Vpar_0068 PE=3 SV=1	8	27872000	2	2	1	2	2	1	6.4	6.4	2.6	36.624	3.7826	6	6
59	tr|D1BLF9|D1BLF9_VEIPT;tr|E1LE94|E1LE94_9FIRM	tr|D1BLF9|D1BLF9_VEIPT	tr|D1BLF9|D1BLF9_VEIPT UDP-3-O-acyl-N-acetylglucosamine deacetylase OS=Veillonella parvula (strain ATCC 10790 / DSM 2008 / CCUG 5123 / JCM 12972 / NCTC 11810 / Te3) OX=479436 GN=lpxC PE=3 SV=1	19	27310000	9	9	9	9	9	9	32.6	32.6	32.6	30.998	20.57	26	28
60	tr|D1BL95|D1BL95_VEIPT	tr|D1BL95|D1BL95_VEIPT	tr|D1BL95|D1BL95_VEIPT Uncharacterized protein OS=Veillonella parvula (strain ATCC 10790 / DSM 2008 / CCUG 5123 / JCM 12972 / NCTC 11810 / Te3) OX=479436 GN=Vpar_0468 PE=3 SV=1	8	27228000	4	4	4	3	3	3	8.3	8.3	8.3	41.1	10.341	10	36
61	tr|D1BN42|D1BN42_VEIPT	tr|D1BN42|D1BN42_VEIPT	tr|D1BN42|D1BN42_VEIPT Cell division protein FtsL OS=Veillonella parvula (strain ATCC 10790 / DSM 2008 / CCUG 5123 / JCM 12972 / NCTC 11810 / Te3) OX=479436 GN=ftsL PE=3 SV=1	7	26826000	5	5	4	3	3	2	44	44	38.8	14.77	36.155	2	12
62	tr|D1BM37|D1BM37_VEIPT	tr|D1BM37|D1BM37_VEIPT	tr|D1BM37|D1BM37_VEIPT Uncharacterized protein OS=Veillonella parvula (strain ATCC 10790 / DSM 2008 / CCUG 5123 / JCM 12972 / NCTC 11810 / Te3) OX=479436 GN=Vpar_0763 PE=4 SV=1	7	25790000	4	4	4	4	4	4	25.6	25.6	25.6	13.791	6.4561	8	8
63	tr|D1BQJ6|D1BQJ6_VEIPT;tr|E1LDI7|E1LDI7_9FIRM	tr|D1BQJ6|D1BQJ6_VEIPT	tr|D1BQJ6|D1BQJ6_VEIPT ABC transporter related protein OS=Veillonella parvula (strain ATCC 10790 / DSM 2008 / CCUG 5123 / JCM 12972 / NCTC 11810 / Te3) OX=479436 GN=Vpar_0120 PE=3 SV=1	19	25214000	6	6	6	5	5	5	23.3	23.3	23.3	29.824	8.6858	12	15
64	tr|D1BLB2|D1BLB2_VEIPT	tr|D1BLB2|D1BLB2_VEIPT	tr|D1BLB2|D1BLB2_VEIPT Oligopeptide/dipeptide ABC transporter, ATPase subunit OS=Veillonella parvula (strain ATCC 10790 / DSM 2008 / CCUG 5123 / JCM 12972 / NCTC 11810 / Te3) OX=479436 GN=Vpar_0486 PE=4 SV=1	20	24912000	7	7	5	7	7	5	21.2	21.2	16.6	36.099	16.341	31	36
65	tr|D1BL12|D1BL12_VEIPT	tr|D1BL12|D1BL12_VEIPT	tr|D1BL12|D1BL12_VEIPT Uncharacterized protein OS=Veillonella parvula (strain ATCC 10790 / DSM 2008 / CCUG 5123 / JCM 12972 / NCTC 11810 / Te3) OX=479436 GN=Vpar_0385 PE=4 SV=1	7	24760000	3	3	3	3	3	3	37.8	37.8	37.8	8.1469	4.076	6	6
66	tr|D1BML9|D1BML9_VEIPT	tr|D1BML9|D1BML9_VEIPT	tr|D1BML9|D1BML9_VEIPT Uncharacterized protein OS=Veillonella parvula (strain ATCC 10790 / DSM 2008 / CCUG 5123 / JCM 12972 / NCTC 11810 / Te3) OX=479436 GN=Vpar_0945 PE=4 SV=1	12	24389000	6	6	6	6	6	6	26.8	26.8	26.8	24.593	11.324	8	8
67	tr|D1BR75|D1BR75_VEIPT;tr|E1LBD3|E1LBD3_9FIRM	tr|D1BR75|D1BR75_VEIPT	tr|D1BR75|D1BR75_VEIPT Uncharacterized protein OS=Veillonella parvula (strain ATCC 10790 / DSM 2008 / CCUG 5123 / JCM 12972 / NCTC 11810 / Te3) OX=479436 GN=Vpar_0354 PE=4 SV=1	15	24263000	6	6	6	6	6	6	34.5	34.5	34.5	22.11	8.9559	6	6
68	tr|D1BM94|D1BM94_VEIPT	tr|D1BM94|D1BM94_VEIPT	tr|D1BM94|D1BM94_VEIPT Trk system potassium uptake protein TrkA OS=Veillonella parvula (strain ATCC 10790 / DSM 2008 / CCUG 5123 / JCM 12972 / NCTC 11810 / Te3) OX=479436 GN=Vpar_0820 PE=4 SV=1	24	23816000	10	10	9	10	10	9	21.1	21.1	19.3	49.279	12.509	15	18
69	tr|D1BQA3|D1BQA3_VEIPT	tr|D1BQA3|D1BQA3_VEIPT	tr|D1BQA3|D1BQA3_VEIPT Glycosyl transferase group 1 OS=Veillonella parvula (strain ATCC 10790 / DSM 2008 / CCUG 5123 / JCM 12972 / NCTC 11810 / Te3) OX=479436 GN=Vpar_0027 PE=4 SV=1	20	23341000	4	4	4	4	4	4	11	11	11	41.748	20.587	11	17
70	tr|D1BLS2|D1BLS2_VEIPT	tr|D1BLS2|D1BLS2_VEIPT	tr|D1BLS2|D1BLS2_VEIPT Uncharacterized protein OS=Veillonella parvula (strain ATCC 10790 / DSM 2008 / CCUG 5123 / JCM 12972 / NCTC 11810 / Te3) OX=479436 GN=Vpar_0646 PE=4 SV=1	10	22500000	2	2	2	2	2	2	7.6	7.6	7.6	38.773	5.9527	2	6
71	tr|D1BLW3|D1BLW3_VEIPT	tr|D1BLW3|D1BLW3_VEIPT	tr|D1BLW3|D1BLW3_VEIPT Anaerobic ribonucleoside-triphosphate reductase-activating protein OS=Veillonella parvula (strain ATCC 10790 / DSM 2008 / CCUG 5123 / JCM 12972 / NCTC 11810 / Te3) OX=479436 GN=Vpar_0687 PE=3 SV=1	9	21149000	4	4	3	4	4	3	29.1	29.1	22.4	18.471	27.58	21	23
72	tr|D1BQF1|D1BQF1_VEIPT;tr|E1LB14|E1LB14_9FIRM	tr|D1BQF1|D1BQF1_VEIPT	tr|D1BQF1|D1BQF1_VEIPT Aminotransferase class I and II OS=Veillonella parvula (strain ATCC 10790 / DSM 2008 / CCUG 5123 / JCM 12972 / NCTC 11810 / Te3) OX=479436 GN=Vpar_0075 PE=4 SV=1	28	21084000	8	8	8	8	8	8	22	22	22	49.515	52.967	16	24
73	tr|D1BQM8|D1BQM8_VEIPT	tr|D1BQM8|D1BQM8_VEIPT	tr|D1BQM8|D1BQM8_VEIPT Amidohydrolase OS=Veillonella parvula (strain ATCC 10790 / DSM 2008 / CCUG 5123 / JCM 12972 / NCTC 11810 / Te3) OX=479436 GN=Vpar_0153 PE=4 SV=1	23	20674000	8	8	8	8	8	8	19.5	19.5	19.5	46.533	29.235	12	13
74	tr|D1BL46|D1BL46_VEIPT	tr|D1BL46|D1BL46_VEIPT	tr|D1BL46|D1BL46_VEIPT Uncharacterized protein OS=Veillonella parvula (strain ATCC 10790 / DSM 2008 / CCUG 5123 / JCM 12972 / NCTC 11810 / Te3) OX=479436 GN=Vpar_0419 PE=4 SV=1	35	20142000	10	10	10	9	9	9	18.2	18.2	18.2	66.452	133.64	13	22
75	tr|D1BPP1|D1BPP1_VEIPT	tr|D1BPP1|D1BPP1_VEIPT	tr|D1BPP1|D1BPP1_VEIPT Uncharacterized protein OS=Veillonella parvula (strain ATCC 10790 / DSM 2008 / CCUG 5123 / JCM 12972 / NCTC 11810 / Te3) OX=479436 GN=Vpar_1672 PE=4 SV=1	11	19896000	2	2	2	2	2	2	7.9	7.9	7.9	34.876	11.537	5	8
76	tr|D1BP24|D1BP24_VEIPT	tr|D1BP24|D1BP24_VEIPT	tr|D1BP24|D1BP24_VEIPT Transcriptional regulator, LysR family OS=Veillonella parvula (strain ATCC 10790 / DSM 2008 / CCUG 5123 / JCM 12972 / NCTC 11810 / Te3) OX=479436 GN=Vpar_1454 PE=3 SV=1	16	19852000	12	12	9	10	10	7	49.5	49.5	39.5	34.337	80.469	24	61
77	tr|D1BM87|D1BM87_VEIPT	tr|D1BM87|D1BM87_VEIPT	tr|D1BM87|D1BM87_VEIPT Glutamate 5-kinase OS=Veillonella parvula (strain ATCC 10790 / DSM 2008 / CCUG 5123 / JCM 12972 / NCTC 11810 / Te3) OX=479436 GN=proB PE=3 SV=1	16	19775000	5	3	3	4	3	3	14.7	10.2	10.2	40.116	13.774	21	37
78	tr|D1BMA3|D1BMA3_VEIPT;tr|E1LDC6|E1LDC6_9FIRM	tr|D1BMA3|D1BMA3_VEIPT	tr|D1BMA3|D1BMA3_VEIPT Cytidylate kinase OS=Veillonella parvula (strain ATCC 10790 / DSM 2008 / CCUG 5123 / JCM 12972 / NCTC 11810 / Te3) OX=479436 GN=cmk PE=3 SV=1	11	19616000	5	5	5	4	4	4	27.3	27.3	27.3	24.85	13.761	8	16
79	tr|D1BPE2|D1BPE2_VEIPT;tr|E1LD71|E1LD71_9FIRM	tr|D1BPE2|D1BPE2_VEIPT;tr|E1LD71|E1LD71_9FIRM	tr|D1BPE2|D1BPE2_VEIPT Phosphocarrier protein HPr OS=Veillonella parvula (strain ATCC 10790 / DSM 2008 / CCUG 5123 / JCM 12972 / NCTC 11810 / Te3) OX=479436 GN=Vpar_1573 PE=4 SV=1;tr|E1LD71|E1LD71_9FIRM Phosphocarrier protein HPr OS=Veillonella atypica ACS	5	19534000	2	2	2	2	2	2	22.1	22.1	22.1	8.8449	4.0537	6	7
80	tr|D1BQX0|D1BQX0_VEIPT	tr|D1BQX0|D1BQX0_VEIPT	tr|D1BQX0|D1BQX0_VEIPT PepSY domain-containing protein OS=Veillonella parvula (strain ATCC 10790 / DSM 2008 / CCUG 5123 / JCM 12972 / NCTC 11810 / Te3) OX=479436 GN=Vpar_0246 PE=4 SV=1	7	19493000	5	5	5	5	5	5	27.8	27.8	27.8	20.393	16.317	12	12
81	tr|D1BQ92|D1BQ92_VEIPT	tr|D1BQ92|D1BQ92_VEIPT	tr|D1BQ92|D1BQ92_VEIPT Glycosyl transferase family 2 OS=Veillonella parvula (strain ATCC 10790 / DSM 2008 / CCUG 5123 / JCM 12972 / NCTC 11810 / Te3) OX=479436 GN=Vpar_0016 PE=4 SV=1	20	19408000	5	5	5	5	5	5	13.4	13.4	13.4	37.015	19.802	8	8
82	tr|D1BR17|D1BR17_VEIPT	tr|D1BR17|D1BR17_VEIPT	tr|D1BR17|D1BR17_VEIPT Aspartate racemase OS=Veillonella parvula (strain ATCC 10790 / DSM 2008 / CCUG 5123 / JCM 12972 / NCTC 11810 / Te3) OX=479436 GN=Vpar_0296 PE=3 SV=1	14	18959000	5	5	5	5	5	5	23.8	23.8	23.8	25.507	11.711	9	9
83	tr|D1BMU2|D1BMU2_VEIPT	tr|D1BMU2|D1BMU2_VEIPT	tr|D1BMU2|D1BMU2_VEIPT Bifunctional enzyme IspD/IspF OS=Veillonella parvula (strain ATCC 10790 / DSM 2008 / CCUG 5123 / JCM 12972 / NCTC 11810 / Te3) OX=479436 GN=ispDF PE=3 SV=1	23	18053000	5	5	4	4	4	3	12	12	9.2	43.081	4.0486	5	9
84	tr|D1BN38|D1BN38_VEIPT	tr|D1BN38|D1BN38_VEIPT	tr|D1BN38|D1BN38_VEIPT UDP-N-acetylmuramoylalanine--D-glutamate ligase OS=Veillonella parvula (strain ATCC 10790 / DSM 2008 / CCUG 5123 / JCM 12972 / NCTC 11810 / Te3) OX=479436 GN=murD PE=3 SV=1	23	17197000	7	7	7	7	7	7	16	16	16	49.67	8.6289	18	19
85	tr|D1BPQ5|D1BPQ5_VEIPT	tr|D1BPQ5|D1BPQ5_VEIPT	tr|D1BPQ5|D1BPQ5_VEIPT Uncharacterized protein OS=Veillonella parvula (strain ATCC 10790 / DSM 2008 / CCUG 5123 / JCM 12972 / NCTC 11810 / Te3) OX=479436 GN=Vpar_1686 PE=4 SV=1	20	17012000	4	4	3	4	4	3	9.8	9.8	8.1	40.053	5.3001	8	8
86	tr|D1BNA3|D1BNA3_VEIPT	tr|D1BNA3|D1BNA3_VEIPT	tr|D1BNA3|D1BNA3_VEIPT UPF0297 protein Vpar_1180 OS=Veillonella parvula (strain ATCC 10790 / DSM 2008 / CCUG 5123 / JCM 12972 / NCTC 11810 / Te3) OX=479436 GN=Vpar_1180 PE=3 SV=1	5	16956000	2	2	2	1	1	1	22.1	22.1	22.1	10.031	2.6257	3	4
87	tr|D1BL31|D1BL31_VEIPT	tr|D1BL31|D1BL31_VEIPT	tr|D1BL31|D1BL31_VEIPT Orotate phosphoribosyltransferase OS=Veillonella parvula (strain ATCC 10790 / DSM 2008 / CCUG 5123 / JCM 12972 / NCTC 11810 / Te3) OX=479436 GN=pyrE PE=3 SV=1	11	16945000	5	5	2	5	5	2	19	19	8.7	21.475	2.7101	8	18
88	tr|D1BMJ5|D1BMJ5_VEIPT;tr|E1LAD3|E1LAD3_9FIRM	tr|D1BMJ5|D1BMJ5_VEIPT;tr|E1LAD3|E1LAD3_9FIRM	tr|D1BMJ5|D1BMJ5_VEIPT Polyprenyl synthetase OS=Veillonella parvula (strain ATCC 10790 / DSM 2008 / CCUG 5123 / JCM 12972 / NCTC 11810 / Te3) OX=479436 GN=Vpar_0921 PE=3 SV=1;tr|E1LAD3|E1LAD3_9FIRM Polyprenyl synthetase OS=Veillonella atypica ACS-134-V-Col	11	16865000	4	4	4	3	3	3	12	12	12	32.227	3.8872	10	14
89	tr|D1BQW6|D1BQW6_VEIPT	tr|D1BQW6|D1BQW6_VEIPT	tr|D1BQW6|D1BQW6_VEIPT Uncharacterized protein OS=Veillonella parvula (strain ATCC 10790 / DSM 2008 / CCUG 5123 / JCM 12972 / NCTC 11810 / Te3) OX=479436 GN=Vpar_0242 PE=4 SV=1	4	16026000	2	2	2	2	2	2	10.8	10.8	10.8	24.369	6.2558	10	18
90	tr|D1BLA7|D1BLA7_VEIPT	tr|D1BLA7|D1BLA7_VEIPT	tr|D1BLA7|D1BLA7_VEIPT Uncharacterized protein OS=Veillonella parvula (strain ATCC 10790 / DSM 2008 / CCUG 5123 / JCM 12972 / NCTC 11810 / Te3) OX=479436 GN=Vpar_0481 PE=4 SV=1	17	15849000	9	9	8	7	7	6	30.6	30.6	27.5	45.42	55.184	19	74
91	tr|D1BNL3|D1BNL3_VEIPT	tr|D1BNL3|D1BNL3_VEIPT	tr|D1BNL3|D1BNL3_VEIPT Citrate transporter OS=Veillonella parvula (strain ATCC 10790 / DSM 2008 / CCUG 5123 / JCM 12972 / NCTC 11810 / Te3) OX=479436 GN=Vpar_1290 PE=3 SV=1	10	15832000	4	4	4	3	3	3	5.4	5.4	5.4	44.581	2.9243	6	9
92	tr|D1BPV2|D1BPV2_VEIPT	tr|D1BPV2|D1BPV2_VEIPT	tr|D1BPV2|D1BPV2_VEIPT NAD(P)H dehydrogenase (Quinone) OS=Veillonella parvula (strain ATCC 10790 / DSM 2008 / CCUG 5123 / JCM 12972 / NCTC 11810 / Te3) OX=479436 GN=Vpar_1733 PE=4 SV=1	11	15826000	3	3	3	3	3	3	14.4	14.4	14.4	21.729	3.6443	10	10
93	tr|D1BMQ7|D1BMQ7_VEIPT	tr|D1BMQ7|D1BMQ7_VEIPT	tr|D1BMQ7|D1BMQ7_VEIPT Uncharacterized protein OS=Veillonella parvula (strain ATCC 10790 / DSM 2008 / CCUG 5123 / JCM 12972 / NCTC 11810 / Te3) OX=479436 GN=Vpar_0983 PE=4 SV=1	9	15567000	4	4	4	3	3	3	11.6	11.6	11.6	28.516	10.32	13	47
94	tr|D1BNY2|D1BNY2_VEIPT	tr|D1BNY2|D1BNY2_VEIPT	tr|D1BNY2|D1BNY2_VEIPT Uncharacterized protein OS=Veillonella parvula (strain ATCC 10790 / DSM 2008 / CCUG 5123 / JCM 12972 / NCTC 11810 / Te3) OX=479436 GN=Vpar_1412 PE=4 SV=1	8	15206000	2	2	2	2	2	2	14.5	14.5	14.5	18.947	26.795	3	3
95	tr|D1BQA9|D1BQA9_VEIPT	tr|D1BQA9|D1BQA9_VEIPT	tr|D1BQA9|D1BQA9_VEIPT NAD-dependent epimerase/dehydratase OS=Veillonella parvula (strain ATCC 10790 / DSM 2008 / CCUG 5123 / JCM 12972 / NCTC 11810 / Te3) OX=479436 GN=Vpar_0033 PE=4 SV=1	20	14998000	9	9	9	9	9	9	27.1	27.1	27.1	39.596	30.828	12	12
96	tr|D1BQ90|D1BQ90_VEIPT	tr|D1BQ90|D1BQ90_VEIPT	tr|D1BQ90|D1BQ90_VEIPT Uncharacterized protein OS=Veillonella parvula (strain ATCC 10790 / DSM 2008 / CCUG 5123 / JCM 12972 / NCTC 11810 / Te3) OX=479436 GN=Vpar_0014 PE=4 SV=1	12	14751000	4	4	4	4	4	4	12	12	12	43.042	16.017	13	14
97	tr|D1BNJ4|D1BNJ4_VEIPT	tr|D1BNJ4|D1BNJ4_VEIPT	tr|D1BNJ4|D1BNJ4_VEIPT M20/DapE family protein YgeY OS=Veillonella parvula (strain ATCC 10790 / DSM 2008 / CCUG 5123 / JCM 12972 / NCTC 11810 / Te3) OX=479436 GN=Vpar_1271 PE=4 SV=1	26	14152000	11	11	11	11	11	11	30.5	30.5	30.5	48.381	53.237	35	45
98	tr|D1BNT7|D1BNT7_VEIPT	tr|D1BNT7|D1BNT7_VEIPT	tr|D1BNT7|D1BNT7_VEIPT Secretion protein HlyD family protein OS=Veillonella parvula (strain ATCC 10790 / DSM 2008 / CCUG 5123 / JCM 12972 / NCTC 11810 / Te3) OX=479436 GN=Vpar_1366 PE=4 SV=1	20	14106000	8	8	8	4	4	4	26.7	26.7	26.7	38.135	69.561	13	21
99	tr|D1BMA1|D1BMA1_VEIPT	tr|D1BMA1|D1BMA1_VEIPT	tr|D1BMA1|D1BMA1_VEIPT Pseudouridine synthase OS=Veillonella parvula (strain ATCC 10790 / DSM 2008 / CCUG 5123 / JCM 12972 / NCTC 11810 / Te3) OX=479436 GN=Vpar_0827 PE=3 SV=1	13	13583000	3	3	3	2	2	2	11.2	11.2	11.2	27.17	3.7565	3	7
100	tr|D1BNZ1|D1BNZ1_VEIPT;tr|E1LBH2|E1LBH2_9FIRM	tr|D1BNZ1|D1BNZ1_VEIPT	tr|D1BNZ1|D1BNZ1_VEIPT Transcriptional regulator, XRE family OS=Veillonella parvula (strain ATCC 10790 / DSM 2008 / CCUG 5123 / JCM 12972 / NCTC 11810 / Te3) OX=479436 GN=Vpar_1421 PE=4 SV=1	8	13402000	4	4	3	3	3	3	24.2	24.2	19	17.372	3.5211	11	13
101	tr|D1BR64|D1BR64_VEIPT	tr|D1BR64|D1BR64_VEIPT	tr|D1BR64|D1BR64_VEIPT Uncharacterized protein OS=Veillonella parvula (strain ATCC 10790 / DSM 2008 / CCUG 5123 / JCM 12972 / NCTC 11810 / Te3) OX=479436 GN=Vpar_0343 PE=4 SV=1	14	12681000	3	3	3	3	3	3	6.8	6.8	6.8	36.703	4.6276	9	9
102	tr|D1BQX2|D1BQX2_VEIPT	tr|D1BQX2|D1BQX2_VEIPT	tr|D1BQX2|D1BQX2_VEIPT Alanine racemase OS=Veillonella parvula (strain ATCC 10790 / DSM 2008 / CCUG 5123 / JCM 12972 / NCTC 11810 / Te3) OX=479436 GN=Vpar_0249 PE=3 SV=1	17	12558000	8	8	3	7	7	3	23.5	23.5	8.4	40.562	14.891	19	33
103	tr|D1BPQ1|D1BPQ1_VEIPT;tr|E1LCX5|E1LCX5_9FIRM	tr|D1BPQ1|D1BPQ1_VEIPT;tr|E1LCX5|E1LCX5_9FIRM	tr|D1BPQ1|D1BPQ1_VEIPT 50S ribosomal protein L9 OS=Veillonella parvula (strain ATCC 10790 / DSM 2008 / CCUG 5123 / JCM 12972 / NCTC 11810 / Te3) OX=479436 GN=rplI PE=3 SV=1;tr|E1LCX5|E1LCX5_9FIRM 50S ribosomal protein L9 OS=Veillonella atypica ACS-134-V-Co	13	12484000	5	5	5	5	5	5	31.8	31.8	31.8	16.068	17.803	13	18
104	tr|D1BQJ4|D1BQJ4_VEIPT	tr|D1BQJ4|D1BQJ4_VEIPT	tr|D1BQJ4|D1BQJ4_VEIPT Type I restriction enzyme endonuclease subunit OS=Veillonella parvula (strain ATCC 10790 / DSM 2008 / CCUG 5123 / JCM 12972 / NCTC 11810 / Te3) OX=479436 GN=Vpar_0118 PE=3 SV=1	67	12368000	22	22	22	21	21	21	20.6	20.6	20.6	121.73	57.526	42	43
105	tr|D1BMD7|D1BMD7_VEIPT	tr|D1BMD7|D1BMD7_VEIPT	tr|D1BMD7|D1BMD7_VEIPT 1-deoxy-D-xylulose 5-phosphate reductoisomerase OS=Veillonella parvula (strain ATCC 10790 / DSM 2008 / CCUG 5123 / JCM 12972 / NCTC 11810 / Te3) OX=479436 GN=dxr PE=3 SV=1	21	12313000	6	6	5	6	6	5	16.5	16.5	12.6	41.689	6.6636	8	10
106	tr|D1BR26|D1BR26_VEIPT	tr|D1BR26|D1BR26_VEIPT	tr|D1BR26|D1BR26_VEIPT Uncharacterized protein OS=Veillonella parvula (strain ATCC 10790 / DSM 2008 / CCUG 5123 / JCM 12972 / NCTC 11810 / Te3) OX=479436 GN=Vpar_0305 PE=4 SV=1	23	12236000	3	3	3	3	3	3	7.3	7.3	7.3	47.075	22.36	11	11
107	tr|D1BQZ1|D1BQZ1_VEIPT	tr|D1BQZ1|D1BQZ1_VEIPT	tr|D1BQZ1|D1BQZ1_VEIPT Propeptide PepSY amd peptidase M4 OS=Veillonella parvula (strain ATCC 10790 / DSM 2008 / CCUG 5123 / JCM 12972 / NCTC 11810 / Te3) OX=479436 GN=Vpar_0270 PE=4 SV=1	7	12060000	3	3	3	3	3	3	19	19	19	21.15	16.79	11	13
108	tr|D1BMN6|D1BMN6_VEIPT	tr|D1BMN6|D1BMN6_VEIPT	tr|D1BMN6|D1BMN6_VEIPT Peptidase M29 aminopeptidase II OS=Veillonella parvula (strain ATCC 10790 / DSM 2008 / CCUG 5123 / JCM 12972 / NCTC 11810 / Te3) OX=479436 GN=Vpar_0962 PE=3 SV=1	20	11983000	5	5	3	3	3	1	10.3	10.3	5.1	46.305	2.7957	3	6
109	tr|D1BQR5|D1BQR5_VEIPT;tr|E1LDR0|E1LDR0_9FIRM	tr|D1BQR5|D1BQR5_VEIPT	tr|D1BQR5|D1BQR5_VEIPT Methyltransferase type 11 OS=Veillonella parvula (strain ATCC 10790 / DSM 2008 / CCUG 5123 / JCM 12972 / NCTC 11810 / Te3) OX=479436 GN=Vpar_0191 PE=4 SV=1	15	11958000	7	7	7	7	7	7	26.4	26.4	26.4	31.479	15.582	14	14
110	tr|D1BQA6|D1BQA6_VEIPT	tr|D1BQA6|D1BQA6_VEIPT	tr|D1BQA6|D1BQA6_VEIPT 4-diphosphocytidyl-2C-methyl-D-erythritolsynthas e OS=Veillonella parvula (strain ATCC 10790 / DSM 2008 / CCUG 5123 / JCM 12972 / NCTC 11810 / Te3) OX=479436 GN=Vpar_0030 PE=4 SV=1	14	11917000	3	3	3	3	3	3	11.3	11.3	11.3	26.486	3.1047	4	4
111	tr|D1BM33|D1BM33_VEIPT;tr|E1LCL5|E1LCL5_9FIRM	tr|D1BM33|D1BM33_VEIPT	tr|D1BM33|D1BM33_VEIPT Glycosyl transferase family 9 OS=Veillonella parvula (strain ATCC 10790 / DSM 2008 / CCUG 5123 / JCM 12972 / NCTC 11810 / Te3) OX=479436 GN=Vpar_0759 PE=4 SV=1	22	11664000	4	4	4	4	4	4	12.1	12.1	12.1	38.156	3.2674	8	13
112	tr|D1BMH6|D1BMH6_VEIPT	tr|D1BMH6|D1BMH6_VEIPT	tr|D1BMH6|D1BMH6_VEIPT Nucleoside diphosphate kinase OS=Veillonella parvula (strain ATCC 10790 / DSM 2008 / CCUG 5123 / JCM 12972 / NCTC 11810 / Te3) OX=479436 GN=ndk PE=3 SV=1	8	11655000	3	3	3	2	2	2	23.7	23.7	23.7	14.852	9.8854	3	6
113	tr|D1BNC5|D1BNC5_VEIPT	tr|D1BNC5|D1BNC5_VEIPT	tr|D1BNC5|D1BNC5_VEIPT Extracellular solute-binding protein family 1 OS=Veillonella parvula (strain ATCC 10790 / DSM 2008 / CCUG 5123 / JCM 12972 / NCTC 11810 / Te3) OX=479436 GN=Vpar_1202 PE=4 SV=1	17	11349000	8	8	8	4	4	4	31	31	31	39.135	83.722	16	60
114	tr|D1BQF2|D1BQF2_VEIPT	tr|D1BQF2|D1BQF2_VEIPT	tr|D1BQF2|D1BQF2_VEIPT Putative transcriptional regulator, ArsR family OS=Veillonella parvula (strain ATCC 10790 / DSM 2008 / CCUG 5123 / JCM 12972 / NCTC 11810 / Te3) OX=479436 GN=Vpar_0076 PE=4 SV=1	9	11302000	2	2	2	2	2	2	12.4	12.4	12.4	17.659	4.0307	3	3
115	tr|D1BQV5|D1BQV5_VEIPT	tr|D1BQV5|D1BQV5_VEIPT	tr|D1BQV5|D1BQV5_VEIPT Lysine exporter protein (LYSE/YGGA) OS=Veillonella parvula (strain ATCC 10790 / DSM 2008 / CCUG 5123 / JCM 12972 / NCTC 11810 / Te3) OX=479436 GN=Vpar_0231 PE=4 SV=1	7	11279000	3	3	3	3	3	3	9.3	9.3	9.3	22.827	6.7568	34	65
116	tr|D1BME0|D1BME0_VEIPT	tr|D1BME0|D1BME0_VEIPT	tr|D1BME0|D1BME0_VEIPT Proline--tRNA ligase OS=Veillonella parvula (strain ATCC 10790 / DSM 2008 / CCUG 5123 / JCM 12972 / NCTC 11810 / Te3) OX=479436 GN=proS PE=3 SV=1	30	11106000	12	12	7	12	12	7	24.8	24.8	15.4	63.429	25.587	25	39
117	tr|D1BNZ2|D1BNZ2_VEIPT	tr|D1BNZ2|D1BNZ2_VEIPT	tr|D1BNZ2|D1BNZ2_VEIPT Glutamate-1-semialdehyde 2,1-aminomutase OS=Veillonella parvula (strain ATCC 10790 / DSM 2008 / CCUG 5123 / JCM 12972 / NCTC 11810 / Te3) OX=479436 GN=hemL PE=3 SV=1	21	11097000	10	10	6	9	9	5	28.6	28.6	15.4	46.818	35.584	14	18
118	tr|D1BN43|D1BN43_VEIPT	tr|D1BN43|D1BN43_VEIPT	tr|D1BN43|D1BN43_VEIPT Ribosomal RNA small subunit methyltransferase H OS=Veillonella parvula (strain ATCC 10790 / DSM 2008 / CCUG 5123 / JCM 12972 / NCTC 11810 / Te3) OX=479436 GN=rsmH PE=3 SV=1	15	11063000	5	5	3	4	4	2	13.5	13.5	7.7	34.594	7.7709	8	17
119	tr|D1BNK0|D1BNK0_VEIPT	tr|D1BNK0|D1BNK0_VEIPT	tr|D1BNK0|D1BNK0_VEIPT Glutamine--tRNA ligase OS=Veillonella parvula (strain ATCC 10790 / DSM 2008 / CCUG 5123 / JCM 12972 / NCTC 11810 / Te3) OX=479436 GN=glnS PE=3 SV=1	39	10922000	18	18	14	13	13	10	34.9	34.9	29.7	64.697	22.209	22	52
120	tr|D1BMW6|D1BMW6_VEIPT	tr|D1BMW6|D1BMW6_VEIPT	tr|D1BMW6|D1BMW6_VEIPT Thiamine-monophosphate kinase OS=Veillonella parvula (strain ATCC 10790 / DSM 2008 / CCUG 5123 / JCM 12972 / NCTC 11810 / Te3) OX=479436 GN=thiL PE=3 SV=1	13	10705000	5	5	5	5	5	5	16	16	16	35.864	2.818	14	14
121	tr|D1BMD3|D1BMD3_VEIPT;tr|E1L9M2|E1L9M2_9FIRM	tr|D1BMD3|D1BMD3_VEIPT;tr|E1L9M2|E1L9M2_9FIRM	tr|D1BMD3|D1BMD3_VEIPT Ribosome-recycling factor OS=Veillonella parvula (strain ATCC 10790 / DSM 2008 / CCUG 5123 / JCM 12972 / NCTC 11810 / Te3) OX=479436 GN=frr PE=3 SV=1;tr|E1L9M2|E1L9M2_9FIRM Ribosome-recycling factor OS=Veillonella atypica ACS-134-V-C	13	10676000	3	3	3	3	3	3	13.4	13.4	13.4	20.889	5.9039	7	7
122	tr|D1BPZ7|D1BPZ7_VEIPT;tr|E1LD59|E1LD59_9FIRM	tr|D1BPZ7|D1BPZ7_VEIPT;tr|E1LD59|E1LD59_9FIRM	tr|D1BPZ7|D1BPZ7_VEIPT Transcriptional regulator, MarR family OS=Veillonella parvula (strain ATCC 10790 / DSM 2008 / CCUG 5123 / JCM 12972 / NCTC 11810 / Te3) OX=479436 GN=Vpar_1778 PE=4 SV=1;tr|E1LD59|E1LD59_9FIRM Transcriptional regulator, MarR family OS	12	10585000	4	4	4	3	3	3	21.5	21.5	21.5	19.616	7.6457	9	13
123	tr|D1BPP2|D1BPP2_VEIPT	tr|D1BPP2|D1BPP2_VEIPT	tr|D1BPP2|D1BPP2_VEIPT Lipolytic protein G-D-S-L family OS=Veillonella parvula (strain ATCC 10790 / DSM 2008 / CCUG 5123 / JCM 12972 / NCTC 11810 / Te3) OX=479436 GN=Vpar_1673 PE=1 SV=1	10	10436000	2	2	2	2	2	2	9.3	9.3	9.3	20.472	2.1301	5	5
124	tr|D1BNX3|D1BNX3_VEIPT	tr|D1BNX3|D1BNX3_VEIPT	tr|D1BNX3|D1BNX3_VEIPT Anion transporter OS=Veillonella parvula (strain ATCC 10790 / DSM 2008 / CCUG 5123 / JCM 12972 / NCTC 11810 / Te3) OX=479436 GN=Vpar_1402 PE=3 SV=1	16	10413000	5	5	5	5	5	5	14.3	14.3	14.3	50.525	42.974	8	8
125	tr|D1BQ42|D1BQ42_VEIPT	tr|D1BQ42|D1BQ42_VEIPT	tr|D1BQ42|D1BQ42_VEIPT Uncharacterized protein OS=Veillonella parvula (strain ATCC 10790 / DSM 2008 / CCUG 5123 / JCM 12972 / NCTC 11810 / Te3) OX=479436 GN=Vpar_1824 PE=4 SV=1	45	10281000	8	8	8	8	8	8	9.1	9.1	9.1	91.923	5.9898	9	9
126	tr|D1BNI6|D1BNI6_VEIPT	tr|D1BNI6|D1BNI6_VEIPT	tr|D1BNI6|D1BNI6_VEIPT Ribulose-1,5-bisphosphate carboxylase/oxygenase large subunit OS=Veillonella parvula (strain ATCC 10790 / DSM 2008 / CCUG 5123 / JCM 12972 / NCTC 11810 / Te3) OX=479436 GN=Vpar_1263 PE=4 SV=1	21	10079000	3	3	3	3	3	3	6.8	6.8	6.8	43.816	6.1105	7	7
127	tr|E1L9W0|E1L9W0_9FIRM	tr|E1L9W0|E1L9W0_9FIRM	tr|E1L9W0|E1L9W0_9FIRM Xaa-His dipeptidase OS=Veillonella atypica ACS-134-V-Col7a OX=866778 GN=pepD PE=4 SV=1	25	9920300	3	2	2	2	1	1	5.2	3.7	3.7	52.652	5.7901	2	4
128	tr|D1BN92|D1BN92_VEIPT;tr|E1LC43|E1LC43_9FIRM	tr|D1BN92|D1BN92_VEIPT;tr|E1LC43|E1LC43_9FIRM	tr|D1BN92|D1BN92_VEIPT Translation initiation factor IF-3 OS=Veillonella parvula (strain ATCC 10790 / DSM 2008 / CCUG 5123 / JCM 12972 / NCTC 11810 / Te3) OX=479436 GN=infC PE=3 SV=1;tr|E1LC43|E1LC43_9FIRM Translation initiation factor IF-3 OS=Veillonella	12	9743200	4	4	4	4	4	4	23.1	23.1	23.1	20.872	26.323	14	14
129	tr|E1LDA3|E1LDA3_9FIRM	tr|E1LDA3|E1LDA3_9FIRM	tr|E1LDA3|E1LDA3_9FIRM Transketolase, pyridine binding domain protein OS=Veillonella atypica ACS-134-V-Col7a OX=866778 GN=HMPREF9684_0148 PE=4 SV=1	16	9718400	3	2	2	2	1	1	11.9	10	10	32.643	2.9073	4	9
130	tr|D1BN94|D1BN94_VEIPT	tr|D1BN94|D1BN94_VEIPT	tr|D1BN94|D1BN94_VEIPT Major facilitator superfamily MFS_1 OS=Veillonella parvula (strain ATCC 10790 / DSM 2008 / CCUG 5123 / JCM 12972 / NCTC 11810 / Te3) OX=479436 GN=Vpar_1171 PE=4 SV=1	11	9692700	4	4	4	4	4	4	10	10	10	43.244	12.933	8	19
131	tr|D1BQM0|D1BQM0_VEIPT	tr|D1BQM0|D1BQM0_VEIPT	tr|D1BQM0|D1BQM0_VEIPT Natural resistance-associated macrophage protein OS=Veillonella parvula (strain ATCC 10790 / DSM 2008 / CCUG 5123 / JCM 12972 / NCTC 11810 / Te3) OX=479436 GN=Vpar_0145 PE=4 SV=1	9	9240700	3	3	3	3	3	3	6	6	6	45.857	4.172	3	4
132	tr|D1BLC0|D1BLC0_VEIPT	tr|D1BLC0|D1BLC0_VEIPT	tr|D1BLC0|D1BLC0_VEIPT Dihydropteroate synthase OS=Veillonella parvula (strain ATCC 10790 / DSM 2008 / CCUG 5123 / JCM 12972 / NCTC 11810 / Te3) OX=479436 GN=Vpar_0494 PE=3 SV=1	17	9206800	4	4	4	3	3	3	15.9	15.9	15.9	30.531	18.598	5	9
133	tr|D1BM46|D1BM46_VEIPT	tr|D1BM46|D1BM46_VEIPT	tr|D1BM46|D1BM46_VEIPT NUDIX hydrolase OS=Veillonella parvula (strain ATCC 10790 / DSM 2008 / CCUG 5123 / JCM 12972 / NCTC 11810 / Te3) OX=479436 GN=Vpar_0772 PE=4 SV=1	8	9172700	1	1	1	1	1	1	6.8	6.8	6.8	19.945	2.4255	1	1
134	tr|D1BMY4|D1BMY4_VEIPT	tr|D1BMY4|D1BMY4_VEIPT	tr|D1BMY4|D1BMY4_VEIPT Putative signal transduction protein with CBS domains OS=Veillonella parvula (strain ATCC 10790 / DSM 2008 / CCUG 5123 / JCM 12972 / NCTC 11810 / Te3) OX=479436 GN=Vpar_1060 PE=4 SV=1	11	9133600	2	2	2	2	2	2	15.1	15.1	15.1	24.695	10.69	4	8
135	tr|D1BNC3|D1BNC3_VEIPT	tr|D1BNC3|D1BNC3_VEIPT	tr|D1BNC3|D1BNC3_VEIPT Putative competence-damage inducible protein OS=Veillonella parvula (strain ATCC 10790 / DSM 2008 / CCUG 5123 / JCM 12972 / NCTC 11810 / Te3) OX=479436 GN=cinA PE=3 SV=1	23	9043700	8	8	6	8	8	6	27.2	27.2	22.9	44.778	129.81	24	24
136	tr|D1BPP3|D1BPP3_VEIPT	tr|D1BPP3|D1BPP3_VEIPT	tr|D1BPP3|D1BPP3_VEIPT Major facilitator superfamily MFS_1 OS=Veillonella parvula (strain ATCC 10790 / DSM 2008 / CCUG 5123 / JCM 12972 / NCTC 11810 / Te3) OX=479436 GN=Vpar_1674 PE=4 SV=1	12	9031000	1	1	1	1	1	1	3.2	3.2	3.2	43.713	31.703	5	17
137	tr|E1LCG9|E1LCG9_9FIRM;tr|D1BLN5|D1BLN5_VEIPT	tr|E1LCG9|E1LCG9_9FIRM;tr|D1BLN5|D1BLN5_VEIPT	tr|E1LCG9|E1LCG9_9FIRM Peptidyl-tRNA hydrolase OS=Veillonella atypica ACS-134-V-Col7a OX=866778 GN=pth PE=3 SV=1;tr|D1BLN5|D1BLN5_VEIPT Peptidyl-tRNA hydrolase OS=Veillonella parvula (strain ATCC 10790 / DSM 2008 / CCUG 5123 / JCM 12972 / NCTC 11810 / Te3)	11	8553200	3	3	3	3	3	3	16.1	16.1	16.1	21.297	2.1643	6	6
138	tr|D1BN96|D1BN96_VEIPT	tr|D1BN96|D1BN96_VEIPT	tr|D1BN96|D1BN96_VEIPT Uncharacterized protein OS=Veillonella parvula (strain ATCC 10790 / DSM 2008 / CCUG 5123 / JCM 12972 / NCTC 11810 / Te3) OX=479436 GN=Vpar_1173 PE=4 SV=1	20	8344500	5	5	5	5	5	5	19.8	19.8	19.8	35.248	10.392	4	5
139	tr|D1BNM2|D1BNM2_VEIPT	tr|D1BNM2|D1BNM2_VEIPT	tr|D1BNM2|D1BNM2_VEIPT Proton-coupled thiamine transporter YuaJ OS=Veillonella parvula (strain ATCC 10790 / DSM 2008 / CCUG 5123 / JCM 12972 / NCTC 11810 / Te3) OX=479436 GN=Vpar_1300 PE=4 SV=1	5	8334400	1	1	1	1	1	1	7.4	7.4	7.4	18.996	3.0863	1	5
140	tr|D1BM10|D1BM10_VEIPT	tr|D1BM10|D1BM10_VEIPT	tr|D1BM10|D1BM10_VEIPT SMI1_KNR4 domain-containing protein OS=Veillonella parvula (strain ATCC 10790 / DSM 2008 / CCUG 5123 / JCM 12972 / NCTC 11810 / Te3) OX=479436 GN=Vpar_0736 PE=4 SV=1	28	8203800	8	8	3	6	6	2	13.7	13.7	5	57.998	11.483	10	20
141	tr|D1BR36|D1BR36_VEIPT	tr|D1BR36|D1BR36_VEIPT	tr|D1BR36|D1BR36_VEIPT Multifunctional fusion protein OS=Veillonella parvula (strain ATCC 10790 / DSM 2008 / CCUG 5123 / JCM 12972 / NCTC 11810 / Te3) OX=479436 GN=thiE PE=3 SV=1	21	8140100	8	8	8	8	8	8	18.5	18.5	18.5	54.686	11.082	16	21
142	tr|D1BN35|D1BN35_VEIPT	tr|D1BN35|D1BN35_VEIPT	tr|D1BN35|D1BN35_VEIPT D-alanine--D-alanine ligase OS=Veillonella parvula (strain ATCC 10790 / DSM 2008 / CCUG 5123 / JCM 12972 / NCTC 11810 / Te3) OX=479436 GN=ddl PE=3 SV=1	19	8120500	5	5	5	4	4	4	15.8	15.8	15.8	33.493	14.982	7	12
143	tr|D1BPE5|D1BPE5_VEIPT	tr|D1BPE5|D1BPE5_VEIPT	tr|D1BPE5|D1BPE5_VEIPT Na+/H+ antiporter NhaC OS=Veillonella parvula (strain ATCC 10790 / DSM 2008 / CCUG 5123 / JCM 12972 / NCTC 11810 / Te3) OX=479436 GN=Vpar_1576 PE=4 SV=1	6	8090700	2	2	2	2	2	2	2.9	2.9	2.9	48.36	2.501	1	4
144	tr|D1BM93|D1BM93_VEIPT;tr|E1LDB6|E1LDB6_9FIRM	tr|D1BM93|D1BM93_VEIPT	tr|D1BM93|D1BM93_VEIPT RNA binding S1 domain protein OS=Veillonella parvula (strain ATCC 10790 / DSM 2008 / CCUG 5123 / JCM 12972 / NCTC 11810 / Te3) OX=479436 GN=Vpar_0819 PE=3 SV=1	18	7999900	5	5	5	3	3	3	19.2	19.2	19.2	33.982	11.241	5	14
145	tr|D1BQA5|D1BQA5_VEIPT	tr|D1BQA5|D1BQA5_VEIPT	tr|D1BQA5|D1BQA5_VEIPT LicD family protein OS=Veillonella parvula (strain ATCC 10790 / DSM 2008 / CCUG 5123 / JCM 12972 / NCTC 11810 / Te3) OX=479436 GN=Vpar_0029 PE=4 SV=1	14	7892500	4	4	4	4	4	4	13.6	13.6	13.6	30.773	5.4603	13	20
146	tr|D1BQW3|D1BQW3_VEIPT	tr|D1BQW3|D1BQW3_VEIPT	tr|D1BQW3|D1BQW3_VEIPT ABC transporter related protein OS=Veillonella parvula (strain ATCC 10790 / DSM 2008 / CCUG 5123 / JCM 12972 / NCTC 11810 / Te3) OX=479436 GN=Vpar_0239 PE=4 SV=1	9	7750900	6	6	5	6	6	5	24.1	24.1	19.8	28.794	3.6436	15	22
147	tr|D1BNF8|D1BNF8_VEIPT	tr|D1BNF8|D1BNF8_VEIPT	tr|D1BNF8|D1BNF8_VEIPT Pseudouridine synthase OS=Veillonella parvula (strain ATCC 10790 / DSM 2008 / CCUG 5123 / JCM 12972 / NCTC 11810 / Te3) OX=479436 GN=Vpar_1235 PE=3 SV=1	20	7445700	3	2	2	2	2	2	10.2	7.5	7.5	34.245	2.9829	3	5
148	tr|D1BL32|D1BL32_VEIPT;tr|E1LB81|E1LB81_9FIRM	tr|D1BL32|D1BL32_VEIPT	tr|D1BL32|D1BL32_VEIPT Orotidine 5-phosphate decarboxylase OS=Veillonella parvula (strain ATCC 10790 / DSM 2008 / CCUG 5123 / JCM 12972 / NCTC 11810 / Te3) OX=479436 GN=pyrF PE=3 SV=1	15	7397900	4	4	4	4	4	4	20.9	20.9	20.9	25.733	21.777	9	11
149	tr|D1BNG0|D1BNG0_VEIPT	tr|D1BNG0|D1BNG0_VEIPT	tr|D1BNG0|D1BNG0_VEIPT Ferredoxin OS=Veillonella parvula (strain ATCC 10790 / DSM 2008 / CCUG 5123 / JCM 12972 / NCTC 11810 / Te3) OX=479436 GN=Vpar_1237 PE=4 SV=1	3	7336400	1	1	1	1	1	1	35.2	35.2	35.2	5.4933	27.933	1	2
150	tr|D1BNZ7|D1BNZ7_VEIPT	tr|D1BNZ7|D1BNZ7_VEIPT	tr|D1BNZ7|D1BNZ7_VEIPT Precorrin-2 dehydrogenase OS=Veillonella parvula (strain ATCC 10790 / DSM 2008 / CCUG 5123 / JCM 12972 / NCTC 11810 / Te3) OX=479436 GN=Vpar_1427 PE=4 SV=1	9	7214900	2	2	2	1	1	1	7	7	7	24.775	1.9601	5	7
151	tr|D1BPQ3|D1BPQ3_VEIPT	tr|D1BPQ3|D1BPQ3_VEIPT	tr|D1BPQ3|D1BPQ3_VEIPT Uncharacterized protein OS=Veillonella parvula (strain ATCC 10790 / DSM 2008 / CCUG 5123 / JCM 12972 / NCTC 11810 / Te3) OX=479436 GN=Vpar_1684 PE=4 SV=1	7	7178000	1	1	1	1	1	1	2.2	2.2	2.2	34.706	2.0389	3	11
152	tr|D1BNW8|D1BNW8_VEIPT	tr|D1BNW8|D1BNW8_VEIPT	tr|D1BNW8|D1BNW8_VEIPT Uncharacterized protein OS=Veillonella parvula (strain ATCC 10790 / DSM 2008 / CCUG 5123 / JCM 12972 / NCTC 11810 / Te3) OX=479436 GN=Vpar_1397 PE=4 SV=1	22	7054600	3	3	3	3	3	3	9	9	9	38.646	5.6504	4	4
153	tr|D1BPX5|D1BPX5_VEIPT	tr|D1BPX5|D1BPX5_VEIPT	tr|D1BPX5|D1BPX5_VEIPT Biopolymer transport protein ExbD/TolR OS=Veillonella parvula (strain ATCC 10790 / DSM 2008 / CCUG 5123 / JCM 12972 / NCTC 11810 / Te3) OX=479436 GN=Vpar_1756 PE=3 SV=1	5	7021600	2	2	2	1	1	1	16.4	16.4	16.4	15.2	8.906	1	4
154	tr|D1BMK4|D1BMK4_VEIPT	tr|D1BMK4|D1BMK4_VEIPT	tr|D1BMK4|D1BMK4_VEIPT 4-hydroxy-tetrahydrodipicolinate synthase OS=Veillonella parvula (strain ATCC 10790 / DSM 2008 / CCUG 5123 / JCM 12972 / NCTC 11810 / Te3) OX=479436 GN=dapA PE=3 SV=1	14	6806000	4	4	4	3	3	3	12.5	12.5	12.5	31.791	3.1016	4	6
155	tr|D1BPG1|D1BPG1_VEIPT	tr|D1BPG1|D1BPG1_VEIPT	tr|D1BPG1|D1BPG1_VEIPT Iron-containing alcohol dehydrogenase OS=Veillonella parvula (strain ATCC 10790 / DSM 2008 / CCUG 5123 / JCM 12972 / NCTC 11810 / Te3) OX=479436 GN=Vpar_1592 PE=4 SV=1	18	6683600	2	2	2	2	2	2	5.9	5.9	5.9	39.107	-2	6	6
156	tr|D1BMZ3|D1BMZ3_VEIPT;tr|E1L993|E1L993_9FIRM	tr|D1BMZ3|D1BMZ3_VEIPT	tr|D1BMZ3|D1BMZ3_VEIPT Thioesterase superfamily protein OS=Veillonella parvula (strain ATCC 10790 / DSM 2008 / CCUG 5123 / JCM 12972 / NCTC 11810 / Te3) OX=479436 GN=Vpar_1069 PE=4 SV=1	12	6663000	3	3	3	3	3	3	20.1	20.1	20.1	16.965	5.6013	8	8
157	tr|D1BM92|D1BM92_VEIPT	tr|D1BM92|D1BM92_VEIPT	tr|D1BM92|D1BM92_VEIPT Ribosomal silencing factor RsfS OS=Veillonella parvula (strain ATCC 10790 / DSM 2008 / CCUG 5123 / JCM 12972 / NCTC 11810 / Te3) OX=479436 GN=rsfS PE=3 SV=1	7	6643300	3	3	3	3	3	3	30	30	30	13.64	10.224	3	3
158	tr|D1BLR4|D1BLR4_VEIPT	tr|D1BLR4|D1BLR4_VEIPT	tr|D1BLR4|D1BLR4_VEIPT Membrane protein-like protein OS=Veillonella parvula (strain ATCC 10790 / DSM 2008 / CCUG 5123 / JCM 12972 / NCTC 11810 / Te3) OX=479436 GN=Vpar_0638 PE=4 SV=1	6	6577500	2	2	2	1	1	1	14.2	14.2	14.2	27.623	20.145	4	5
159	tr|D1BPE8|D1BPE8_VEIPT	tr|D1BPE8|D1BPE8_VEIPT	tr|D1BPE8|D1BPE8_VEIPT ATPase involved in DNA repair-like protein OS=Veillonella parvula (strain ATCC 10790 / DSM 2008 / CCUG 5123 / JCM 12972 / NCTC 11810 / Te3) OX=479436 GN=Vpar_1579 PE=4 SV=1	62	6545300	10	10	10	9	9	9	10	10	10	133.57	55.126	15	28
160	tr|D1BN89|D1BN89_VEIPT	tr|D1BN89|D1BN89_VEIPT	tr|D1BN89|D1BN89_VEIPT Uncharacterized protein OS=Veillonella parvula (strain ATCC 10790 / DSM 2008 / CCUG 5123 / JCM 12972 / NCTC 11810 / Te3) OX=479436 GN=Vpar_1166 PE=4 SV=1	12	6502900	5	5	5	5	5	5	26.1	26.1	26.1	21.083	7.6787	7	8
161	tr|D1BLX2|D1BLX2_VEIPT;tr|E1LCD5|E1LCD5_9FIRM	tr|D1BLX2|D1BLX2_VEIPT	tr|D1BLX2|D1BLX2_VEIPT 3-oxoacyl-[acyl-carrier-protein] synthase 3 OS=Veillonella parvula (strain ATCC 10790 / DSM 2008 / CCUG 5123 / JCM 12972 / NCTC 11810 / Te3) OX=479436 GN=fabH PE=3 SV=1	16	6481000	5	5	5	4	4	4	20.2	20.2	20.2	35.604	39.508	5	7
162	tr|D1BPL0|D1BPL0_VEIPT	tr|D1BPL0|D1BPL0_VEIPT	tr|D1BPL0|D1BPL0_VEIPT Efflux transporter, RND family, MFP subunit OS=Veillonella parvula (strain ATCC 10790 / DSM 2008 / CCUG 5123 / JCM 12972 / NCTC 11810 / Te3) OX=479436 GN=Vpar_1641 PE=3 SV=1	16	6475200	3	3	3	2	2	2	9.2	9.2	9.2	39.463	2.6163	2	6
163	tr|D1BQW7|D1BQW7_VEIPT	tr|D1BQW7|D1BQW7_VEIPT	tr|D1BQW7|D1BQW7_VEIPT Uncharacterized protein OS=Veillonella parvula (strain ATCC 10790 / DSM 2008 / CCUG 5123 / JCM 12972 / NCTC 11810 / Te3) OX=479436 GN=Vpar_0243 PE=4 SV=1	7	6444600	1	1	1	1	1	1	4.8	4.8	4.8	25.712	8.2863	2	8
164	tr|D1BNQ3|D1BNQ3_VEIPT	tr|D1BNQ3|D1BNQ3_VEIPT	tr|D1BNQ3|D1BNQ3_VEIPT ATPase associated with various cellular activities AAA_5 OS=Veillonella parvula (strain ATCC 10790 / DSM 2008 / CCUG 5123 / JCM 12972 / NCTC 11810 / Te3) OX=479436 GN=Vpar_1332 PE=4 SV=1	21	6440100	5	5	5	5	5	5	15.3	15.3	15.3	41.614	7.9632	6	6
165	tr|D1BMV2|D1BMV2_VEIPT;tr|E1LAV4|E1LAV4_9FIRM	tr|D1BMV2|D1BMV2_VEIPT	tr|D1BMV2|D1BMV2_VEIPT Cysteine desulfurase OS=Veillonella parvula (strain ATCC 10790 / DSM 2008 / CCUG 5123 / JCM 12972 / NCTC 11810 / Te3) OX=479436 GN=Vpar_1028 PE=3 SV=1	23	6422200	6	6	6	5	5	5	15.2	15.2	15.2	45.69	8.0608	13	20
166	tr|D1BNW0|D1BNW0_VEIPT	tr|D1BNW0|D1BNW0_VEIPT	tr|D1BNW0|D1BNW0_VEIPT Methyltransferase type 12 OS=Veillonella parvula (strain ATCC 10790 / DSM 2008 / CCUG 5123 / JCM 12972 / NCTC 11810 / Te3) OX=479436 GN=Vpar_1389 PE=4 SV=1	23	6377600	7	7	6	7	7	6	15.6	15.6	14.5	60.746	89.304	9	19
167	tr|D1BNY3|D1BNY3_VEIPT;tr|D1BNY1|D1BNY1_VEIPT	tr|D1BNY3|D1BNY3_VEIPT	tr|D1BNY3|D1BNY3_VEIPT Filamentous hemagglutinin family outer membrane protein OS=Veillonella parvula (strain ATCC 10790 / DSM 2008 / CCUG 5123 / JCM 12972 / NCTC 11810 / Te3) OX=479436 GN=Vpar_1413 PE=4 SV=1	111	6366700	17	17	14	15	15	12	9.2	9.2	7.4	209.98	26.039	20	23
168	tr|D1BQA1|D1BQA1_VEIPT	tr|D1BQA1|D1BQA1_VEIPT	tr|D1BQA1|D1BQA1_VEIPT Uncharacterized protein OS=Veillonella parvula (strain ATCC 10790 / DSM 2008 / CCUG 5123 / JCM 12972 / NCTC 11810 / Te3) OX=479436 GN=Vpar_0025 PE=4 SV=1	24	6141100	7	7	7	5	5	5	14.4	14.4	14.4	61.604	17.275	10	35
169	tr|D1BQU3|D1BQU3_VEIPT	tr|D1BQU3|D1BQU3_VEIPT	tr|D1BQU3|D1BQU3_VEIPT Chlorite dismutase OS=Veillonella parvula (strain ATCC 10790 / DSM 2008 / CCUG 5123 / JCM 12972 / NCTC 11810 / Te3) OX=479436 GN=Vpar_0219 PE=4 SV=1	13	6104100	5	5	4	5	5	4	18.1	18.1	15.6	27.844	13.049	8	15
170	tr|D1BP27|D1BP27_VEIPT;tr|E1LDY0|E1LDY0_9FIRM	tr|D1BP27|D1BP27_VEIPT;tr|E1LDY0|E1LDY0_9FIRM	tr|D1BP27|D1BP27_VEIPT Nicotinate-nucleotide--dimethylbenzimidazole phosphoribosyltransferase OS=Veillonella parvula (strain ATCC 10790 / DSM 2008 / CCUG 5123 / JCM 12972 / NCTC 11810 / Te3) OX=479436 GN=arsA PE=3 SV=1;tr|E1LDY0|E1LDY0_9FIRM Nicotinate-nuc	13	6056100	4	4	4	4	4	4	13.9	13.9	13.9	36.492	7.8917	8	9
171	tr|D1BPV9|D1BPV9_VEIPT	tr|D1BPV9|D1BPV9_VEIPT	tr|D1BPV9|D1BPV9_VEIPT 5-methylcytosine-specific restriction enzyme McrBC, subunit McrC OS=Veillonella parvula (strain ATCC 10790 / DSM 2008 / CCUG 5123 / JCM 12972 / NCTC 11810 / Te3) OX=479436 GN=Vpar_1740 PE=4 SV=1	23	5889500	3	3	3	3	3	3	9.2	9.2	9.2	40.833	4.6448	4	4
172	tr|D1BPB4|D1BPB4_VEIPT	tr|D1BPB4|D1BPB4_VEIPT	tr|D1BPB4|D1BPB4_VEIPT Phosphoglucomutase (alpha-D-glucose-1,6-bisphosphate-dependent) OS=Veillonella parvula (strain ATCC 10790 / DSM 2008 / CCUG 5123 / JCM 12972 / NCTC 11810 / Te3) OX=479436 GN=Vpar_1545 PE=3 SV=1	27	5856100	9	9	7	9	9	7	22.6	22.6	19.1	59.194	17.217	19	19
173	tr|D1BQ41|D1BQ41_VEIPT	tr|D1BQ41|D1BQ41_VEIPT	tr|D1BQ41|D1BQ41_VEIPT Uncharacterized protein OS=Veillonella parvula (strain ATCC 10790 / DSM 2008 / CCUG 5123 / JCM 12972 / NCTC 11810 / Te3) OX=479436 GN=Vpar_1823 PE=4 SV=1	44	5783700	11	11	11	11	11	11	16.4	16.4	16.4	82.352	44.191	18	18
174	tr|D1BMW5|D1BMW5_VEIPT	tr|D1BMW5|D1BMW5_VEIPT	tr|D1BMW5|D1BMW5_VEIPT tRNA threonylcarbamoyladenosine biosynthesis protein TsaE OS=Veillonella parvula (strain ATCC 10790 / DSM 2008 / CCUG 5123 / JCM 12972 / NCTC 11810 / Te3) OX=479436 GN=Vpar_1041 PE=3 SV=1	10	5782700	1	1	1	1	1	1	5.5	5.5	5.5	18.572	2.3148	3	3
175	tr|D1BQ34|D1BQ34_VEIPT	tr|D1BQ34|D1BQ34_VEIPT	tr|D1BQ34|D1BQ34_VEIPT Uncharacterized protein OS=Veillonella parvula (strain ATCC 10790 / DSM 2008 / CCUG 5123 / JCM 12972 / NCTC 11810 / Te3) OX=479436 GN=Vpar_1816 PE=4 SV=1	11	5758400	4	4	4	4	4	4	22.3	22.3	22.3	23.759	6.734	6	6
176	tr|D1BPZ3|D1BPZ3_VEIPT	tr|D1BPZ3|D1BPZ3_VEIPT	tr|D1BPZ3|D1BPZ3_VEIPT BFD domain protein (2Fe-2S)-binding domain protein OS=Veillonella parvula (strain ATCC 10790 / DSM 2008 / CCUG 5123 / JCM 12972 / NCTC 11810 / Te3) OX=479436 GN=Vpar_1774 PE=4 SV=1	4	5746700	1	1	1	1	1	1	18.2	18.2	18.2	8.3587	1.8825	2	2
177	tr|D1BMH0|D1BMH0_VEIPT	tr|D1BMH0|D1BMH0_VEIPT	tr|D1BMH0|D1BMH0_VEIPT YdjC family protein OS=Veillonella parvula (strain ATCC 10790 / DSM 2008 / CCUG 5123 / JCM 12972 / NCTC 11810 / Te3) OX=479436 GN=Vpar_0896 PE=4 SV=1	15	5659100	2	2	2	2	2	2	6.7	6.7	6.7	31.3	2.4233	9	9
178	tr|D1BQT1|D1BQT1_VEIPT;tr|E1LDP8|E1LDP8_9FIRM	tr|D1BQT1|D1BQT1_VEIPT;tr|E1LDP8|E1LDP8_9FIRM	tr|D1BQT1|D1BQT1_VEIPT Phosphoenolpyruvate carboxykinase (ATP) OS=Veillonella parvula (strain ATCC 10790 / DSM 2008 / CCUG 5123 / JCM 12972 / NCTC 11810 / Te3) OX=479436 GN=Vpar_0207 PE=3 SV=1;tr|E1LDP8|E1LDP8_9FIRM Phosphoenolpyruvate carboxykinase (ATP)	32	5546200	5	5	5	2	2	2	8.7	8.7	8.7	61.381	2.9091	2	6
179	tr|D1BNV5|D1BNV5_VEIPT;tr|E1L9F8|E1L9F8_9FIRM	tr|D1BNV5|D1BNV5_VEIPT	tr|D1BNV5|D1BNV5_VEIPT Dihydrofolate reductase OS=Veillonella parvula (strain ATCC 10790 / DSM 2008 / CCUG 5123 / JCM 12972 / NCTC 11810 / Te3) OX=479436 GN=Vpar_1384 PE=3 SV=1	8	5503100	4	4	4	3	3	3	25	25	25	18.673	2.7981	7	8
180	tr|D1BNP8|D1BNP8_VEIPT	tr|D1BNP8|D1BNP8_VEIPT	tr|D1BNP8|D1BNP8_VEIPT Uncharacterized protein OS=Veillonella parvula (strain ATCC 10790 / DSM 2008 / CCUG 5123 / JCM 12972 / NCTC 11810 / Te3) OX=479436 GN=Vpar_1327 PE=4 SV=1	10	5490100	1	1	1	1	1	1	9.9	9.9	9.9	13.766	2.2801	1	1
181	tr|D1BLY3|D1BLY3_VEIPT;tr|E1LCE6|E1LCE6_9FIRM	tr|D1BLY3|D1BLY3_VEIPT;tr|E1LCE6|E1LCE6_9FIRM	tr|D1BLY3|D1BLY3_VEIPT Uncharacterized protein OS=Veillonella parvula (strain ATCC 10790 / DSM 2008 / CCUG 5123 / JCM 12972 / NCTC 11810 / Te3) OX=479436 GN=Vpar_0707 PE=4 SV=1;tr|E1LCE6|E1LCE6_9FIRM Uncharacterized protein OS=Veillonella atypica ACS-134-V	8	5474300	2	2	2	2	2	2	15	15	15	15.157	18.608	2	3
182	tr|D1BKY6|D1BKY6_VEIPT;tr|E1LBD8|E1LBD8_9FIRM	tr|D1BKY6|D1BKY6_VEIPT;tr|E1LBD8|E1LBD8_9FIRM	tr|D1BKY6|D1BKY6_VEIPT Homocysteine S-methyltransferase OS=Veillonella parvula (strain ATCC 10790 / DSM 2008 / CCUG 5123 / JCM 12972 / NCTC 11810 / Te3) OX=479436 GN=Vpar_0359 PE=4 SV=1;tr|E1LBD8|E1LBD8_9FIRM Homocysteine S-methyltransferase OS=Veillonella	25	5330500	4	4	4	3	3	3	10	10	10	37.165	3.4745	3	6
183	tr|D1BN76|D1BN76_VEIPT	tr|D1BN76|D1BN76_VEIPT	tr|D1BN76|D1BN76_VEIPT Auxin Efflux Carrier OS=Veillonella parvula (strain ATCC 10790 / DSM 2008 / CCUG 5123 / JCM 12972 / NCTC 11810 / Te3) OX=479436 GN=Vpar_1152 PE=3 SV=1	6	5321200	1	1	1	1	1	1	4	4	4	38.268	22.717	1	2
184	tr|D1BNB3|D1BNB3_VEIPT	tr|D1BNB3|D1BNB3_VEIPT	tr|D1BNB3|D1BNB3_VEIPT GTP cyclohydrolase 1 type 2 homolog OS=Veillonella parvula (strain ATCC 10790 / DSM 2008 / CCUG 5123 / JCM 12972 / NCTC 11810 / Te3) OX=479436 GN=Vpar_1190 PE=3 SV=1	18	5320900	4	4	4	4	4	4	10.9	10.9	10.9	39.555	16.952	4	4
185	tr|D1BP34|D1BP34_VEIPT	tr|D1BP34|D1BP34_VEIPT	tr|D1BP34|D1BP34_VEIPT ABC transporter ATP-binding protein OS=Veillonella parvula (strain ATCC 10790 / DSM 2008 / CCUG 5123 / JCM 12972 / NCTC 11810 / Te3) OX=479436 GN=Vpar_1465 PE=3 SV=1	17	5179000	8	8	8	7	7	7	28.5	28.5	28.5	33.104	27.72	17	48
186	tr|D1BN55|D1BN55_VEIPT	tr|D1BN55|D1BN55_VEIPT	tr|D1BN55|D1BN55_VEIPT Anaerobic cobalt chelatase OS=Veillonella parvula (strain ATCC 10790 / DSM 2008 / CCUG 5123 / JCM 12972 / NCTC 11810 / Te3) OX=479436 GN=Vpar_1131 PE=4 SV=1	14	5168800	2	2	2	2	2	2	8.8	8.8	8.8	32.06	3.2285	4	4
187	tr|E1LBA4|E1LBA4_9FIRM	tr|E1LBA4|E1LBA4_9FIRM	tr|E1LBA4|E1LBA4_9FIRM Acyl-CoA thioester hydrolase, YbgC/YbaW family OS=Veillonella atypica ACS-134-V-Col7a OX=866778 GN=HMPREF9684_1477 PE=3 SV=1	9	5159500	2	2	1	2	2	1	13.7	13.7	9.4	16.46	3.7236	2	4
188	tr|D1BLD8|D1BLD8_VEIPT	tr|D1BLD8|D1BLD8_VEIPT	tr|D1BLD8|D1BLD8_VEIPT Guanine deaminase OS=Veillonella parvula (strain ATCC 10790 / DSM 2008 / CCUG 5123 / JCM 12972 / NCTC 11810 / Te3) OX=479436 GN=Vpar_0512 PE=3 SV=1	20	5103800	4	4	4	2	2	2	10.3	10.3	10.3	47.336	2.9668	6	12
189	tr|D1BQ15|D1BQ15_VEIPT	tr|D1BQ15|D1BQ15_VEIPT	tr|D1BQ15|D1BQ15_VEIPT SSS sodium solute transporter superfamily OS=Veillonella parvula (strain ATCC 10790 / DSM 2008 / CCUG 5123 / JCM 12972 / NCTC 11810 / Te3) OX=479436 GN=Vpar_1797 PE=3 SV=1	12	5100200	4	4	4	3	3	3	8.7	8.7	8.7	49.64	8.261	5	24
190	tr|D1BLK0|D1BLK0_VEIPT;tr|E1LE54|E1LE54_9FIRM	tr|D1BLK0|D1BLK0_VEIPT;tr|E1LE54|E1LE54_9FIRM	tr|D1BLK0|D1BLK0_VEIPT Pyridine nucleotide-disulphide oxidoreductase dimerization region OS=Veillonella parvula (strain ATCC 10790 / DSM 2008 / CCUG 5123 / JCM 12972 / NCTC 11810 / Te3) OX=479436 GN=Vpar_0574 PE=3 SV=1;tr|E1LE54|E1LE54_9FIRM Pyridine nucle	20	5094300	3	3	3	3	3	3	7.9	7.9	7.9	47.73	22.575	8	9
191	tr|D1BQZ2|D1BQZ2_VEIPT	tr|D1BQZ2|D1BQZ2_VEIPT	tr|D1BQZ2|D1BQZ2_VEIPT Biotin transporter OS=Veillonella parvula (strain ATCC 10790 / DSM 2008 / CCUG 5123 / JCM 12972 / NCTC 11810 / Te3) OX=479436 GN=Vpar_0271 PE=3 SV=1	6	4958900	2	2	2	2	2	2	9.6	9.6	9.6	20.099	6.2055	0	13
192	tr|D1BL04|D1BL04_VEIPT	tr|D1BL04|D1BL04_VEIPT	tr|D1BL04|D1BL04_VEIPT 2-succinylbenzoate--CoA ligase OS=Veillonella parvula (strain ATCC 10790 / DSM 2008 / CCUG 5123 / JCM 12972 / NCTC 11810 / Te3) OX=479436 GN=menE PE=3 SV=1	26	4856700	6	6	6	4	4	4	11.3	11.3	11.3	55.478	6.0117	4	6
193	tr|D1BMD5|D1BMD5_VEIPT	tr|D1BMD5|D1BMD5_VEIPT	tr|D1BMD5|D1BMD5_VEIPT Isoprenyl transferase OS=Veillonella parvula (strain ATCC 10790 / DSM 2008 / CCUG 5123 / JCM 12972 / NCTC 11810 / Te3) OX=479436 GN=Vpar_0861 PE=3 SV=1	17	4760800	4	4	4	3	3	3	14.6	14.6	14.6	29.358	4.4553	7	18
194	tr|D1BL79|D1BL79_VEIPT	tr|D1BL79|D1BL79_VEIPT	tr|D1BL79|D1BL79_VEIPT HSDR_N_2 domain-containing protein OS=Veillonella parvula (strain ATCC 10790 / DSM 2008 / CCUG 5123 / JCM 12972 / NCTC 11810 / Te3) OX=479436 GN=Vpar_0452 PE=4 SV=1	21	4730700	6	6	4	5	5	4	15	15	12.8	45.722	4.173	4	6
195	tr|D1BQQ5|D1BQQ5_VEIPT	tr|D1BQQ5|D1BQQ5_VEIPT	tr|D1BQQ5|D1BQQ5_VEIPT Aldo/keto reductase OS=Veillonella parvula (strain ATCC 10790 / DSM 2008 / CCUG 5123 / JCM 12972 / NCTC 11810 / Te3) OX=479436 GN=Vpar_0180 PE=4 SV=1	17	4624000	4	4	4	4	4	4	11.5	11.5	11.5	32.696	2.6645	6	6
196	tr|D1BQL9|D1BQL9_VEIPT;tr|E1LAY1|E1LAY1_9FIRM	tr|D1BQL9|D1BQL9_VEIPT	tr|D1BQL9|D1BQL9_VEIPT Uncharacterized protein OS=Veillonella parvula (strain ATCC 10790 / DSM 2008 / CCUG 5123 / JCM 12972 / NCTC 11810 / Te3) OX=479436 GN=Vpar_0144 PE=4 SV=1	13	4583400	3	3	3	2	2	2	10.4	10.4	10.4	28.466	4.5499	5	10
197	tr|D1BQ46|D1BQ46_VEIPT	tr|D1BQ46|D1BQ46_VEIPT	tr|D1BQ46|D1BQ46_VEIPT Glycoside hydrolase family 3 domain protein OS=Veillonella parvula (strain ATCC 10790 / DSM 2008 / CCUG 5123 / JCM 12972 / NCTC 11810 / Te3) OX=479436 GN=Vpar_1829 PE=4 SV=1	20	4502400	3	3	3	2	2	2	7.3	7.3	7.3	42.5	3.9015	4	7
198	tr|E1LED9|E1LED9_9FIRM;tr|D1BNQ1|D1BNQ1_VEIPT	tr|E1LED9|E1LED9_9FIRM;tr|D1BNQ1|D1BNQ1_VEIPT	tr|E1LED9|E1LED9_9FIRM UPF0173 metal-dependent hydrolase HMPREF9684_0097 OS=Veillonella atypica ACS-134-V-Col7a OX=866778 GN=HMPREF9684_0097 PE=3 SV=1;tr|D1BNQ1|D1BNQ1_VEIPT UPF0173 metal-dependent hydrolase Vpar_1330 OS=Veillonella parvula (strain ATCC 10	10	4437900	3	3	3	3	3	3	14.2	14.2	14.2	24.401	3.499	15	20
199	tr|D1BPE0|D1BPE0_VEIPT	tr|D1BPE0|D1BPE0_VEIPT	tr|D1BPE0|D1BPE0_VEIPT Peptidoglycan glycosyltransferase OS=Veillonella parvula (strain ATCC 10790 / DSM 2008 / CCUG 5123 / JCM 12972 / NCTC 11810 / Te3) OX=479436 GN=Vpar_1571 PE=4 SV=1	12	4429500	4	4	4	3	3	3	13.4	13.4	13.4	30.889	13.861	3	7
200	tr|E1LCJ2|E1LCJ2_9FIRM	tr|E1LCJ2|E1LCJ2_9FIRM	tr|E1LCJ2|E1LCJ2_9FIRM SMI1 / KNR4 family protein OS=Veillonella atypica ACS-134-V-Col7a OX=866778 GN=HMPREF9684_1779 PE=4 SV=1	31	4406700	7	2	2	5	1	1	12.9	4.2	4.2	58.419	1.9338	9	27
201	tr|D1BQM1|D1BQM1_VEIPT;tr|E1LAY3|E1LAY3_9FIRM	tr|D1BQM1|D1BQM1_VEIPT	tr|D1BQM1|D1BQM1_VEIPT Uncharacterized protein OS=Veillonella parvula (strain ATCC 10790 / DSM 2008 / CCUG 5123 / JCM 12972 / NCTC 11810 / Te3) OX=479436 GN=Vpar_0146 PE=4 SV=1	9	4324800	4	4	4	3	3	3	20.5	20.5	20.5	22.56	3.1041	6	9
202	tr|D1BML2|D1BML2_VEIPT	tr|D1BML2|D1BML2_VEIPT	tr|D1BML2|D1BML2_VEIPT Phosphoesterase PA-phosphatase related protein OS=Veillonella parvula (strain ATCC 10790 / DSM 2008 / CCUG 5123 / JCM 12972 / NCTC 11810 / Te3) OX=479436 GN=Vpar_0938 PE=4 SV=1	7	4290500	2	2	2	2	2	2	15.6	15.6	15.6	23.177	8.9743	6	11
203	tr|D1BM34|D1BM34_VEIPT	tr|D1BM34|D1BM34_VEIPT	tr|D1BM34|D1BM34_VEIPT Glycosyl transferase family 9 OS=Veillonella parvula (strain ATCC 10790 / DSM 2008 / CCUG 5123 / JCM 12972 / NCTC 11810 / Te3) OX=479436 GN=Vpar_0760 PE=1 SV=1	15	4231100	3	3	3	2	2	2	9.2	9.2	9.2	38.989	3.6263	24	31
204	tr|D1BL51|D1BL51_VEIPT	tr|D1BL51|D1BL51_VEIPT	tr|D1BL51|D1BL51_VEIPT TrpR like protein, YerC/YecD OS=Veillonella parvula (strain ATCC 10790 / DSM 2008 / CCUG 5123 / JCM 12972 / NCTC 11810 / Te3) OX=479436 GN=Vpar_0424 PE=4 SV=1	4	4230900	2	2	2	1	1	1	21.4	21.4	21.4	10.986	18.456	2	2
205	tr|D1BQG7|D1BQG7_VEIPT	tr|D1BQG7|D1BQG7_VEIPT	tr|D1BQG7|D1BQG7_VEIPT Uncharacterized protein OS=Veillonella parvula (strain ATCC 10790 / DSM 2008 / CCUG 5123 / JCM 12972 / NCTC 11810 / Te3) OX=479436 GN=Vpar_0091 PE=4 SV=1	5	4179100	1	1	1	1	1	1	13.9	13.9	13.9	12.386	15.137	1	1
206	tr|D1BNQ5|D1BNQ5_VEIPT	tr|D1BNQ5|D1BNQ5_VEIPT	tr|D1BNQ5|D1BNQ5_VEIPT TrkA-N domain protein OS=Veillonella parvula (strain ATCC 10790 / DSM 2008 / CCUG 5123 / JCM 12972 / NCTC 11810 / Te3) OX=479436 GN=Vpar_1334 PE=4 SV=1	14	4130600	4	4	3	4	4	3	25.9	25.9	20.8	23.818	6.5348	5	5
207	tr|D1BPL1|D1BPL1_VEIPT;tr|E1LA23|E1LA23_9FIRM	tr|D1BPL1|D1BPL1_VEIPT	tr|D1BPL1|D1BPL1_VEIPT Aldo/keto reductase OS=Veillonella parvula (strain ATCC 10790 / DSM 2008 / CCUG 5123 / JCM 12972 / NCTC 11810 / Te3) OX=479436 GN=Vpar_1642 PE=4 SV=1	18	4109600	5	5	5	5	5	5	21.9	21.9	21.9	32.649	29.466	7	8
208	tr|D1BQR8|D1BQR8_VEIPT;tr|E1LDQ8|E1LDQ8_9FIRM	tr|D1BQR8|D1BQR8_VEIPT;tr|E1LDQ8|E1LDQ8_9FIRM	tr|D1BQR8|D1BQR8_VEIPT GCN5-related N-acetyltransferase OS=Veillonella parvula (strain ATCC 10790 / DSM 2008 / CCUG 5123 / JCM 12972 / NCTC 11810 / Te3) OX=479436 GN=Vpar_0194 PE=4 SV=1;tr|E1LDQ8|E1LDQ8_9FIRM Acetyltransferase, GNAT family OS=Veillonella a	5	4102700	2	2	2	2	2	2	15	15	15	18.038	2.3528	2	2
209	tr|E1L9U0|E1L9U0_9FIRM;tr|D1BR31|D1BR31_VEIPT	tr|E1L9U0|E1L9U0_9FIRM;tr|D1BR31|D1BR31_VEIPT	tr|E1L9U0|E1L9U0_9FIRM Molybdenum transport system permease OS=Veillonella atypica ACS-134-V-Col7a OX=866778 GN=modB PE=3 SV=1;tr|D1BR31|D1BR31_VEIPT Molybdenum transport system permease OS=Veillonella parvula (strain ATCC 10790 / DSM 2008 / CCUG 5123 / JC	5	3974600	2	2	2	2	2	2	10.4	10.4	10.4	24.008	3.1865	2	8
210	tr|D1BNK7|D1BNK7_VEIPT	tr|D1BNK7|D1BNK7_VEIPT	tr|D1BNK7|D1BNK7_VEIPT Uncharacterized protein OS=Veillonella parvula (strain ATCC 10790 / DSM 2008 / CCUG 5123 / JCM 12972 / NCTC 11810 / Te3) OX=479436 GN=Vpar_1284 PE=4 SV=1	7	3957400	2	2	2	2	2	2	20	20	20	11.481	1.7966	2	2
211	tr|D1BM64|D1BM64_VEIPT	tr|D1BM64|D1BM64_VEIPT	tr|D1BM64|D1BM64_VEIPT Riboflavin biosynthesis protein OS=Veillonella parvula (strain ATCC 10790 / DSM 2008 / CCUG 5123 / JCM 12972 / NCTC 11810 / Te3) OX=479436 GN=Vpar_0790 PE=3 SV=1	18	3919700	7	7	7	5	5	5	26.8	26.8	26.8	35.233	9.8606	13	75
212	tr|D1BL17|D1BL17_VEIPT	tr|D1BL17|D1BL17_VEIPT	tr|D1BL17|D1BL17_VEIPT Nitrilase/cyanide hydratase and apolipoprotein N-acyltransferase OS=Veillonella parvula (strain ATCC 10790 / DSM 2008 / CCUG 5123 / JCM 12972 / NCTC 11810 / Te3) OX=479436 GN=Vpar_0390 PE=4 SV=1	15	3918500	4	4	2	4	4	2	14.1	14.1	8.7	29.796	2.966	4	7
213	tr|D1BNP5|D1BNP5_VEIPT	tr|D1BNP5|D1BNP5_VEIPT	tr|D1BNP5|D1BNP5_VEIPT Uncharacterized protein OS=Veillonella parvula (strain ATCC 10790 / DSM 2008 / CCUG 5123 / JCM 12972 / NCTC 11810 / Te3) OX=479436 GN=Vpar_1323 PE=4 SV=1	14	3793200	2	2	2	2	2	2	9.6	9.6	9.6	25.919	2.8884	3	3
214	tr|D1BNV7|D1BNV7_VEIPT	tr|D1BNV7|D1BNV7_VEIPT	tr|D1BNV7|D1BNV7_VEIPT DNA helicase OS=Veillonella parvula (strain ATCC 10790 / DSM 2008 / CCUG 5123 / JCM 12972 / NCTC 11810 / Te3) OX=479436 GN=Vpar_1386 PE=3 SV=1	44	3754000	8	8	7	6	6	6	10.9	10.9	9.6	69.53	3.4317	5	6
215	tr|D1BL00|D1BL00_VEIPT;tr|E1LBF2|E1LBF2_9FIRM	tr|D1BL00|D1BL00_VEIPT;tr|E1LBF2|E1LBF2_9FIRM	tr|D1BL00|D1BL00_VEIPT Isochorismate synthase OS=Veillonella parvula (strain ATCC 10790 / DSM 2008 / CCUG 5123 / JCM 12972 / NCTC 11810 / Te3) OX=479436 GN=Vpar_0373 PE=3 SV=1;tr|E1LBF2|E1LBF2_9FIRM Isochorismate synthase OS=Veillonella atypica ACS-134-V-C	21	3747400	5	5	5	4	4	4	12.6	12.6	12.6	42.759	3.7586	15	17
216	tr|D1BNQ7|D1BNQ7_VEIPT	tr|D1BNQ7|D1BNQ7_VEIPT	tr|D1BNQ7|D1BNQ7_VEIPT PfkB domain protein OS=Veillonella parvula (strain ATCC 10790 / DSM 2008 / CCUG 5123 / JCM 12972 / NCTC 11810 / Te3) OX=479436 GN=Vpar_1336 PE=4 SV=1	23	3715000	8	8	8	8	8	8	24.6	24.6	24.6	35.991	19.132	17	17
217	tr|D1BNN2|D1BNN2_VEIPT	tr|D1BNN2|D1BNN2_VEIPT	tr|D1BNN2|D1BNN2_VEIPT Metallophosphoesterase OS=Veillonella parvula (strain ATCC 10790 / DSM 2008 / CCUG 5123 / JCM 12972 / NCTC 11810 / Te3) OX=479436 GN=Vpar_1310 PE=4 SV=1	18	3692000	2	2	2	1	1	1	4.8	4.8	4.8	50.292	3.9317	1	5
218	tr|D1BPF4|D1BPF4_VEIPT	tr|D1BPF4|D1BPF4_VEIPT	tr|D1BPF4|D1BPF4_VEIPT Arginine--tRNA ligase OS=Veillonella parvula (strain ATCC 10790 / DSM 2008 / CCUG 5123 / JCM 12972 / NCTC 11810 / Te3) OX=479436 GN=argS PE=3 SV=1	33	3678800	7	7	4	5	5	3	14.2	14.2	8.8	64.793	19.633	9	16
219	tr|D1BQ95|D1BQ95_VEIPT	tr|D1BQ95|D1BQ95_VEIPT	tr|D1BQ95|D1BQ95_VEIPT Glycosyl transferase group 1 OS=Veillonella parvula (strain ATCC 10790 / DSM 2008 / CCUG 5123 / JCM 12972 / NCTC 11810 / Te3) OX=479436 GN=Vpar_0019 PE=4 SV=1	22	3604500	5	5	5	5	5	5	13.5	13.5	13.5	46.396	19.276	8	8
220	tr|E1LAE6|E1LAE6_9FIRM	tr|E1LAE6|E1LAE6_9FIRM	tr|E1LAE6|E1LAE6_9FIRM ABC transporter, ATP-binding protein OS=Veillonella atypica ACS-134-V-Col7a OX=866778 GN=HMPREF9684_1901 PE=4 SV=1	21	3573400	4	2	2	3	1	1	11.9	7.3	7.3	36.642	2.0711	4	5
221	tr|D1BMZ5|D1BMZ5_VEIPT	tr|D1BMZ5|D1BMZ5_VEIPT	tr|D1BMZ5|D1BMZ5_VEIPT ABC transporter related protein OS=Veillonella parvula (strain ATCC 10790 / DSM 2008 / CCUG 5123 / JCM 12972 / NCTC 11810 / Te3) OX=479436 GN=Vpar_1071 PE=4 SV=1	16	3433800	3	3	3	2	2	2	16.7	16.7	16.7	26.216	41.878	3	5
222	tr|D1BQJ3|D1BQJ3_VEIPT	tr|D1BQJ3|D1BQJ3_VEIPT	tr|D1BQJ3|D1BQJ3_VEIPT Restriction modification system DNA specificity domain protein OS=Veillonella parvula (strain ATCC 10790 / DSM 2008 / CCUG 5123 / JCM 12972 / NCTC 11810 / Te3) OX=479436 GN=Vpar_0117 PE=3 SV=1	25	3396200	8	8	8	6	6	6	17.5	17.5	17.5	45.668	21.57	7	10
223	tr|E1LB25|E1LB25_9FIRM;tr|D1BQE0|D1BQE0_VEIPT	tr|E1LB25|E1LB25_9FIRM;tr|D1BQE0|D1BQE0_VEIPT	tr|E1LB25|E1LB25_9FIRM ABC transporter, ATP-binding protein OS=Veillonella atypica ACS-134-V-Col7a OX=866778 GN=HMPREF9684_1564 PE=4 SV=1;tr|D1BQE0|D1BQE0_VEIPT ABC transporter related protein OS=Veillonella parvula (strain ATCC 10790 / DSM 2008 / CCUG 512	15	3333200	2	2	2	2	2	2	10.3	10.3	10.3	28.108	12.576	3	3
224	tr|D1BQL6|D1BQL6_VEIPT	tr|D1BQL6|D1BQL6_VEIPT	tr|D1BQL6|D1BQL6_VEIPT Cysteine synthase OS=Veillonella parvula (strain ATCC 10790 / DSM 2008 / CCUG 5123 / JCM 12972 / NCTC 11810 / Te3) OX=479436 GN=Vpar_0141 PE=4 SV=1	14	3289100	2	2	2	2	2	2	9.5	9.5	9.5	32.632	3.3241	2	2
225	tr|D1BNK5|D1BNK5_VEIPT	tr|D1BNK5|D1BNK5_VEIPT	tr|D1BNK5|D1BNK5_VEIPT Threonine synthase OS=Veillonella parvula (strain ATCC 10790 / DSM 2008 / CCUG 5123 / JCM 12972 / NCTC 11810 / Te3) OX=479436 GN=Vpar_1282 PE=3 SV=1	27	3209800	8	8	4	7	7	4	18.4	18.4	10.4	55.351	27.207	9	35
226	tr|D1BR39|D1BR39_VEIPT;tr|E1L9U8|E1L9U8_9FIRM	tr|D1BR39|D1BR39_VEIPT;tr|E1L9U8|E1L9U8_9FIRM	tr|D1BR39|D1BR39_VEIPT Selenide, water dikinase OS=Veillonella parvula (strain ATCC 10790 / DSM 2008 / CCUG 5123 / JCM 12972 / NCTC 11810 / Te3) OX=479436 GN=selD PE=3 SV=1;tr|E1L9U8|E1L9U8_9FIRM Selenide, water dikinase OS=Veillonella atypica ACS-134-V-Co	8	3205400	2	2	2	2	2	2	6.1	6.1	6.1	35.873	2.2379	3	3
227	tr|E1LBH6|E1LBH6_9FIRM	tr|E1LBH6|E1LBH6_9FIRM	tr|E1LBH6|E1LBH6_9FIRM Porphobilinogen deaminase OS=Veillonella atypica ACS-134-V-Col7a OX=866778 GN=hemC PE=3 SV=1	24	3187900	4	4	4	1	1	1	12.2	12.2	12.2	33.949	4.7924	1	4
228	tr|E1LBV0|E1LBV0_9FIRM	tr|E1LBV0|E1LBV0_9FIRM	tr|E1LBV0|E1LBV0_9FIRM Ribosomal RNA large subunit methyltransferase H OS=Veillonella atypica ACS-134-V-Col7a OX=866778 GN=rlmH PE=3 SV=1	11	3174700	2	2	1	1	1	0	11.9	11.9	5.7	18.017	1.9289	2	3
229	tr|D1BMK1|D1BMK1_VEIPT	tr|D1BMK1|D1BMK1_VEIPT	tr|D1BMK1|D1BMK1_VEIPT DNA repair protein RecN OS=Veillonella parvula (strain ATCC 10790 / DSM 2008 / CCUG 5123 / JCM 12972 / NCTC 11810 / Te3) OX=479436 GN=Vpar_0927 PE=3 SV=1	39	3162200	12	12	9	9	9	6	24.2	24.2	18.1	62.748	10.546	9	13
230	tr|D1BMC2|D1BMC2_VEIPT	tr|D1BMC2|D1BMC2_VEIPT	tr|D1BMC2|D1BMC2_VEIPT Methionyl-tRNA formyltransferase OS=Veillonella parvula (strain ATCC 10790 / DSM 2008 / CCUG 5123 / JCM 12972 / NCTC 11810 / Te3) OX=479436 GN=fmt PE=3 SV=1	16	3098900	7	7	7	7	7	7	30.7	30.7	30.7	36.457	9.6603	13	18
231	tr|D1BLB7|D1BLB7_VEIPT;tr|E1LAF1|E1LAF1_9FIRM	tr|D1BLB7|D1BLB7_VEIPT	tr|D1BLB7|D1BLB7_VEIPT Peptidase M20 domain-containing protein 2 OS=Veillonella parvula (strain ATCC 10790 / DSM 2008 / CCUG 5123 / JCM 12972 / NCTC 11810 / Te3) OX=479436 GN=Vpar_0491 PE=3 SV=1	14	3090400	4	4	4	3	3	3	8.9	8.9	8.9	41.012	3.8087	4	5
232	tr|D1BLA1|D1BLA1_VEIPT	tr|D1BLA1|D1BLA1_VEIPT	tr|D1BLA1|D1BLA1_VEIPT Polysaccharide deacetylase OS=Veillonella parvula (strain ATCC 10790 / DSM 2008 / CCUG 5123 / JCM 12972 / NCTC 11810 / Te3) OX=479436 GN=Vpar_0474 PE=4 SV=1	14	3070800	3	3	3	3	3	3	14.3	14.3	14.3	32.372	6.3384	14	29
233	tr|D1BMN9|D1BMN9_VEIPT	tr|D1BMN9|D1BMN9_VEIPT	tr|D1BMN9|D1BMN9_VEIPT Glycoside hydrolase family 18 OS=Veillonella parvula (strain ATCC 10790 / DSM 2008 / CCUG 5123 / JCM 12972 / NCTC 11810 / Te3) OX=479436 GN=Vpar_0965 PE=4 SV=1	28	3060000	3	3	3	2	2	2	7	7	7	63.567	2.4554	2	3
234	tr|D1BLM0|D1BLM0_VEIPT	tr|D1BLM0|D1BLM0_VEIPT	tr|D1BLM0|D1BLM0_VEIPT S-adenosylmethionine:tRNA ribosyltransferase-isomerase OS=Veillonella parvula (strain ATCC 10790 / DSM 2008 / CCUG 5123 / JCM 12972 / NCTC 11810 / Te3) OX=479436 GN=queA PE=3 SV=1	19	3025300	4	4	3	3	3	3	14.7	14.7	12.6	38.448	5.7779	4	6
235	tr|D1BMB7|D1BMB7_VEIPT	tr|D1BMB7|D1BMB7_VEIPT	tr|D1BMB7|D1BMB7_VEIPT Coenzyme A biosynthesis bifunctional protein CoaBC OS=Veillonella parvula (strain ATCC 10790 / DSM 2008 / CCUG 5123 / JCM 12972 / NCTC 11810 / Te3) OX=479436 GN=coaBC PE=3 SV=1	17	2993400	3	3	3	3	3	3	7	7	7	43.535	3.9145	5	7
236	tr|D1BKY5|D1BKY5_VEIPT	tr|D1BKY5|D1BKY5_VEIPT	tr|D1BKY5|D1BKY5_VEIPT Extracellular solute-binding protein family 3 OS=Veillonella parvula (strain ATCC 10790 / DSM 2008 / CCUG 5123 / JCM 12972 / NCTC 11810 / Te3) OX=479436 GN=Vpar_0358 PE=4 SV=1	14	2816300	2	2	2	2	2	2	8.8	8.8	8.8	28.026	2.8032	2	2
237	tr|D1BQA4|D1BQA4_VEIPT	tr|D1BQA4|D1BQA4_VEIPT	tr|D1BQA4|D1BQA4_VEIPT Polysaccharide deacetylase OS=Veillonella parvula (strain ATCC 10790 / DSM 2008 / CCUG 5123 / JCM 12972 / NCTC 11810 / Te3) OX=479436 GN=Vpar_0028 PE=4 SV=1	24	2731900	4	4	4	4	4	4	9.9	9.9	9.9	39.841	45.784	25	27
238	tr|D1BLN8|D1BLN8_VEIPT	tr|D1BLN8|D1BLN8_VEIPT	tr|D1BLN8|D1BLN8_VEIPT DNA polymerase III gamma/tau subunits-like protein OS=Veillonella parvula (strain ATCC 10790 / DSM 2008 / CCUG 5123 / JCM 12972 / NCTC 11810 / Te3) OX=479436 GN=Vpar_0612 PE=4 SV=1	25	2709300	3	3	3	3	3	3	7.5	7.5	7.5	38.782	1.9262	5	8
239	tr|D1BNB4|D1BNB4_VEIPT	tr|D1BNB4|D1BNB4_VEIPT	tr|D1BNB4|D1BNB4_VEIPT Uncharacterized protein OS=Veillonella parvula (strain ATCC 10790 / DSM 2008 / CCUG 5123 / JCM 12972 / NCTC 11810 / Te3) OX=479436 GN=Vpar_1191 PE=4 SV=1	18	2681700	3	3	3	2	2	2	7.9	7.9	7.9	27.119	1.79	3	5
240	tr|D1BN66|D1BN66_VEIPT	tr|D1BN66|D1BN66_VEIPT	tr|D1BN66|D1BN66_VEIPT Cobalamin (Vitamin B12) biosynthesis CbiG protein OS=Veillonella parvula (strain ATCC 10790 / DSM 2008 / CCUG 5123 / JCM 12972 / NCTC 11810 / Te3) OX=479436 GN=Vpar_1142 PE=4 SV=1	19	2628000	4	4	3	4	4	3	13.1	13.1	10.2	41.713	3.6899	5	5
241	tr|D1BMF4|D1BMF4_VEIPT	tr|D1BMF4|D1BMF4_VEIPT	tr|D1BMF4|D1BMF4_VEIPT Heat-inducible transcription repressor HrcA OS=Veillonella parvula (strain ATCC 10790 / DSM 2008 / CCUG 5123 / JCM 12972 / NCTC 11810 / Te3) OX=479436 GN=hrcA PE=3 SV=1	14	2529500	3	3	3	3	3	3	7.9	7.9	7.9	38.096	2.207	2	2
242	tr|E1LDF4|E1LDF4_9FIRM	tr|E1LDF4|E1LDF4_9FIRM	tr|E1LDF4|E1LDF4_9FIRM Uncharacterized protein OS=Veillonella atypica ACS-134-V-Col7a OX=866778 GN=HMPREF9684_1332 PE=4 SV=1	20	2437000	4	4	4	1	1	1	12	12	12	35.35	3.4661	1	6
243	tr|D1BQZ5|D1BQZ5_VEIPT	tr|D1BQZ5|D1BQZ5_VEIPT	tr|D1BQZ5|D1BQZ5_VEIPT Cobalamin synthesis protein P47K OS=Veillonella parvula (strain ATCC 10790 / DSM 2008 / CCUG 5123 / JCM 12972 / NCTC 11810 / Te3) OX=479436 GN=Vpar_0274 PE=4 SV=1	14	2397900	4	4	4	4	4	4	17	17	17	32.519	5.4937	15	22
244	tr|D1BNX9|D1BNX9_VEIPT	tr|D1BNX9|D1BNX9_VEIPT	tr|D1BNX9|D1BNX9_VEIPT Uncharacterized protein OS=Veillonella parvula (strain ATCC 10790 / DSM 2008 / CCUG 5123 / JCM 12972 / NCTC 11810 / Te3) OX=479436 GN=Vpar_1408 PE=4 SV=1	14	2388000	3	3	3	2	2	2	9.1	9.1	9.1	34.768	3.96	2	13
245	tr|D1BNY7|D1BNY7_VEIPT	tr|D1BNY7|D1BNY7_VEIPT	tr|D1BNY7|D1BNY7_VEIPT Uncharacterized protein OS=Veillonella parvula (strain ATCC 10790 / DSM 2008 / CCUG 5123 / JCM 12972 / NCTC 11810 / Te3) OX=479436 GN=Vpar_1417 PE=4 SV=1	17	2359300	4	4	4	4	4	4	11.5	11.5	11.5	34.691	3.9046	6	6
246	tr|D1BN11|D1BN11_VEIPT;tr|E1L9B2|E1L9B2_9FIRM	tr|D1BN11|D1BN11_VEIPT	tr|D1BN11|D1BN11_VEIPT 2,3-bisphosphoglycerate-independent phosphoglycerate mutase OS=Veillonella parvula (strain ATCC 10790 / DSM 2008 / CCUG 5123 / JCM 12972 / NCTC 11810 / Te3) OX=479436 GN=gpmI PE=3 SV=1	25	2317400	5	5	5	5	5	5	9.4	9.4	9.4	55.593	4.6767	7	8
247	tr|D1BLK8|D1BLK8_VEIPT	tr|D1BLK8|D1BLK8_VEIPT	tr|D1BLK8|D1BLK8_VEIPT DUF4178 domain-containing protein OS=Veillonella parvula (strain ATCC 10790 / DSM 2008 / CCUG 5123 / JCM 12972 / NCTC 11810 / Te3) OX=479436 GN=Vpar_0582 PE=4 SV=1	24	2237100	2	1	1	2	1	1	4.9	2.6	2.6	40.239	1.9721	2	4
248	tr|D1BLE1|D1BLE1_VEIPT	tr|D1BLE1|D1BLE1_VEIPT	tr|D1BLE1|D1BLE1_VEIPT Probable transaldolase OS=Veillonella parvula (strain ATCC 10790 / DSM 2008 / CCUG 5123 / JCM 12972 / NCTC 11810 / Te3) OX=479436 GN=tal PE=3 SV=1	12	2214800	3	3	3	1	1	1	11.7	11.7	11.7	23.133	2.5753	2	6
249	tr|D1BQZ9|D1BQZ9_VEIPT	tr|D1BQZ9|D1BQZ9_VEIPT	tr|D1BQZ9|D1BQZ9_VEIPT L-asparaginase, type II OS=Veillonella parvula (strain ATCC 10790 / DSM 2008 / CCUG 5123 / JCM 12972 / NCTC 11810 / Te3) OX=479436 GN=Vpar_0278 PE=3 SV=1	15	2209700	3	3	3	3	3	3	9.2	9.2	9.2	34.797	1.8281	6	7
250	tr|D1BP74|D1BP74_VEIPT	tr|D1BP74|D1BP74_VEIPT	tr|D1BP74|D1BP74_VEIPT Glycosyl transferase family 39 OS=Veillonella parvula (strain ATCC 10790 / DSM 2008 / CCUG 5123 / JCM 12972 / NCTC 11810 / Te3) OX=479436 GN=Vpar_1505 PE=4 SV=1	23	2209100	3	3	3	3	3	3	4.9	4.9	4.9	62.454	3.1768	4	5
251	tr|D1BR22|D1BR22_VEIPT	tr|D1BR22|D1BR22_VEIPT	tr|D1BR22|D1BR22_VEIPT Uncharacterized protein OS=Veillonella parvula (strain ATCC 10790 / DSM 2008 / CCUG 5123 / JCM 12972 / NCTC 11810 / Te3) OX=479436 GN=Vpar_0301 PE=4 SV=1	10	2199300	2	2	2	1	1	1	14.6	14.6	14.6	18.628	3.1565	2	6
252	tr|D1BMP0|D1BMP0_VEIPT	tr|D1BMP0|D1BMP0_VEIPT	tr|D1BMP0|D1BMP0_VEIPT Phosphatidylglycerol--prolipoprotein diacylglyceryl transferase OS=Veillonella parvula (strain ATCC 10790 / DSM 2008 / CCUG 5123 / JCM 12972 / NCTC 11810 / Te3) OX=479436 GN=lgt PE=3 SV=1	10	2183900	1	1	1	1	1	1	10.9	10.9	10.9	30.778	33.053	0	1
253	tr|D1BNX5|D1BNX5_VEIPT	tr|D1BNX5|D1BNX5_VEIPT	tr|D1BNX5|D1BNX5_VEIPT Uncharacterized protein OS=Veillonella parvula (strain ATCC 10790 / DSM 2008 / CCUG 5123 / JCM 12972 / NCTC 11810 / Te3) OX=479436 GN=Vpar_1404 PE=3 SV=1	9	2165700	1	1	1	1	1	1	9.7	9.7	9.7	27.191	120.87	2	25
254	tr|D1BLS8|D1BLS8_VEIPT	tr|D1BLS8|D1BLS8_VEIPT	tr|D1BLS8|D1BLS8_VEIPT AMP-dependent synthetase and ligase OS=Veillonella parvula (strain ATCC 10790 / DSM 2008 / CCUG 5123 / JCM 12972 / NCTC 11810 / Te3) OX=479436 GN=Vpar_0652 PE=4 SV=1	20	2122700	2	2	2	2	2	2	5.1	5.1	5.1	49.243	2.0263	3	3
255	tr|D1BPA7|D1BPA7_VEIPT	tr|D1BPA7|D1BPA7_VEIPT	tr|D1BPA7|D1BPA7_VEIPT ATP synthase subunit a OS=Veillonella parvula (strain ATCC 10790 / DSM 2008 / CCUG 5123 / JCM 12972 / NCTC 11810 / Te3) OX=479436 GN=atpB PE=3 SV=1	7	2122400	2	2	2	2	2	2	6	6	6	25.869	3.6528	13	23
256	tr|D1BNW4|D1BNW4_VEIPT;tr|E1L9G7|E1L9G7_9FIRM	tr|D1BNW4|D1BNW4_VEIPT;tr|E1L9G7|E1L9G7_9FIRM	tr|D1BNW4|D1BNW4_VEIPT Uncharacterized protein OS=Veillonella parvula (strain ATCC 10790 / DSM 2008 / CCUG 5123 / JCM 12972 / NCTC 11810 / Te3) OX=479436 GN=Vpar_1393 PE=4 SV=1;tr|E1L9G7|E1L9G7_9FIRM Uncharacterized protein OS=Veillonella atypica ACS-134-V	13	2052800	4	4	4	2	2	2	19	19	19	24.511	4.7917	2	5
257	tr|D1BMW1|D1BMW1_VEIPT	tr|D1BMW1|D1BMW1_VEIPT	tr|D1BMW1|D1BMW1_VEIPT Signal transduction histidine kinase OS=Veillonella parvula (strain ATCC 10790 / DSM 2008 / CCUG 5123 / JCM 12972 / NCTC 11810 / Te3) OX=479436 GN=Vpar_1037 PE=4 SV=1	29	2039700	5	5	4	5	5	4	11.9	11.9	9.5	52.457	6.5425	9	13
258	tr|D1BPU2|D1BPU2_VEIPT	tr|D1BPU2|D1BPU2_VEIPT	tr|D1BPU2|D1BPU2_VEIPT Isochorismatase hydrolase OS=Veillonella parvula (strain ATCC 10790 / DSM 2008 / CCUG 5123 / JCM 12972 / NCTC 11810 / Te3) OX=479436 GN=Vpar_1723 PE=4 SV=1	7	2034700	3	3	3	3	3	3	17.3	17.3	17.3	19.752	2.9194	6	6
259	tr|D1BMM8|D1BMM8_VEIPT	tr|D1BMM8|D1BMM8_VEIPT	tr|D1BMM8|D1BMM8_VEIPT Riboflavin biosynthesis protein RibD OS=Veillonella parvula (strain ATCC 10790 / DSM 2008 / CCUG 5123 / JCM 12972 / NCTC 11810 / Te3) OX=479436 GN=Vpar_0954 PE=3 SV=1	28	2007700	6	6	6	5	5	5	19.8	19.8	19.8	43.441	8.9501	10	12
260	tr|D1BPW2|D1BPW2_VEIPT	tr|D1BPW2|D1BPW2_VEIPT	tr|D1BPW2|D1BPW2_VEIPT 5-nucleotidase, lipoprotein e(P4) family OS=Veillonella parvula (strain ATCC 10790 / DSM 2008 / CCUG 5123 / JCM 12972 / NCTC 11810 / Te3) OX=479436 GN=Vpar_1743 PE=4 SV=1	22	1956400	3	3	3	2	2	2	13.3	13.3	13.3	36.277	92.396	3	4
261	tr|D1BMX3|D1BMX3_VEIPT	tr|D1BMX3|D1BMX3_VEIPT	tr|D1BMX3|D1BMX3_VEIPT 5-nucleotidase SurE OS=Veillonella parvula (strain ATCC 10790 / DSM 2008 / CCUG 5123 / JCM 12972 / NCTC 11810 / Te3) OX=479436 GN=surE PE=3 SV=1	14	1942600	1	1	1	1	1	1	5.1	5.1	5.1	28.167	4.3739	1	1
262	tr|D1BQT2|D1BQT2_VEIPT	tr|D1BQT2|D1BQT2_VEIPT	tr|D1BQT2|D1BQT2_VEIPT Transcriptional regulator, LysR family OS=Veillonella parvula (strain ATCC 10790 / DSM 2008 / CCUG 5123 / JCM 12972 / NCTC 11810 / Te3) OX=479436 GN=Vpar_0208 PE=3 SV=1	15	1938100	2	2	2	2	2	2	8.3	8.3	8.3	33.707	2.8398	4	5
263	tr|D1BMS9|D1BMS9_VEIPT	tr|D1BMS9|D1BMS9_VEIPT	tr|D1BMS9|D1BMS9_VEIPT 8-amino-7-ketopelargonate synthase OS=Veillonella parvula (strain ATCC 10790 / DSM 2008 / CCUG 5123 / JCM 12972 / NCTC 11810 / Te3) OX=479436 GN=Vpar_1005 PE=3 SV=1	17	1885200	4	4	4	3	3	3	9.6	9.6	9.6	42.283	6.8526	3	4
264	tr|D1BLI5|D1BLI5_VEIPT	tr|D1BLI5|D1BLI5_VEIPT	tr|D1BLI5|D1BLI5_VEIPT Nucleotide-binding protein Vpar_0559 OS=Veillonella parvula (strain ATCC 10790 / DSM 2008 / CCUG 5123 / JCM 12972 / NCTC 11810 / Te3) OX=479436 GN=Vpar_0559 PE=3 SV=1	18	1842800	3	3	3	3	3	3	15.5	15.5	15.5	34.794	2.3544	7	9
265	tr|D1BR55|D1BR55_VEIPT	tr|D1BR55|D1BR55_VEIPT	tr|D1BR55|D1BR55_VEIPT Beta-lactamase domain protein OS=Veillonella parvula (strain ATCC 10790 / DSM 2008 / CCUG 5123 / JCM 12972 / NCTC 11810 / Te3) OX=479436 GN=Vpar_0334 PE=4 SV=1	25	1794600	4	4	4	4	4	4	9.5	9.5	9.5	44.406	4.2976	5	5
266	tr|D1BNI5|D1BNI5_VEIPT	tr|D1BNI5|D1BNI5_VEIPT	tr|D1BNI5|D1BNI5_VEIPT Beta-lactamase domain protein OS=Veillonella parvula (strain ATCC 10790 / DSM 2008 / CCUG 5123 / JCM 12972 / NCTC 11810 / Te3) OX=479436 GN=Vpar_1262 PE=4 SV=1	16	1714900	2	2	2	2	2	2	12.3	12.3	12.3	29.594	4.7349	2	2
267	tr|D1BNX0|D1BNX0_VEIPT;tr|E1L9H4|E1L9H4_9FIRM	tr|D1BNX0|D1BNX0_VEIPT;tr|E1L9H4|E1L9H4_9FIRM	tr|D1BNX0|D1BNX0_VEIPT Citrate lyase alpha chain OS=Veillonella parvula (strain ATCC 10790 / DSM 2008 / CCUG 5123 / JCM 12972 / NCTC 11810 / Te3) OX=479436 GN=Vpar_1399 PE=4 SV=1;tr|E1L9H4|E1L9H4_9FIRM Citrate lyase alpha chain OS=Veillonella atypica ACS-1	22	1692800	3	3	3	2	2	2	5.6	5.6	5.6	55.198	2.9651	0	5
268	tr|D1BN15|D1BN15_VEIPT	tr|D1BN15|D1BN15_VEIPT	tr|D1BN15|D1BN15_VEIPT Transcriptional regulator, DeoR family OS=Veillonella parvula (strain ATCC 10790 / DSM 2008 / CCUG 5123 / JCM 12972 / NCTC 11810 / Te3) OX=479436 GN=Vpar_1091 PE=3 SV=1	23	1687000	3	3	3	3	3	3	9.1	9.1	9.1	37.533	3.6976	3	7
269	tr|E1LDJ0|E1LDJ0_9FIRM	tr|E1LDJ0|E1LDJ0_9FIRM	tr|E1LDJ0|E1LDJ0_9FIRM Uncharacterized protein OS=Veillonella atypica ACS-134-V-Col7a OX=866778 GN=HMPREF9684_1244 PE=4 SV=1	10	1646400	2	2	2	1	1	1	12.3	12.3	12.3	16.417	-2	0	1
270	tr|D1BM47|D1BM47_VEIPT	tr|D1BM47|D1BM47_VEIPT	tr|D1BM47|D1BM47_VEIPT Phosphopentomutase OS=Veillonella parvula (strain ATCC 10790 / DSM 2008 / CCUG 5123 / JCM 12972 / NCTC 11810 / Te3) OX=479436 GN=deoB PE=3 SV=1	22	1602900	4	4	4	4	4	4	14.4	14.4	14.4	43.112	32.96	11	11
271	tr|D1BMV3|D1BMV3_VEIPT	tr|D1BMV3|D1BMV3_VEIPT	tr|D1BMV3|D1BMV3_VEIPT SufBD protein OS=Veillonella parvula (strain ATCC 10790 / DSM 2008 / CCUG 5123 / JCM 12972 / NCTC 11810 / Te3) OX=479436 GN=Vpar_1029 PE=4 SV=1	19	1567200	3	3	3	3	3	3	11.8	11.8	11.8	38.248	2.0894	7	7
272	tr|D1BLC3|D1BLC3_VEIPT	tr|D1BLC3|D1BLC3_VEIPT	tr|D1BLC3|D1BLC3_VEIPT Uncharacterized protein OS=Veillonella parvula (strain ATCC 10790 / DSM 2008 / CCUG 5123 / JCM 12972 / NCTC 11810 / Te3) OX=479436 GN=Vpar_0497 PE=4 SV=1	16	1512100	4	4	4	4	4	4	13.7	13.7	13.7	30.812	2.9355	5	5
273	tr|D1BP17|D1BP17_VEIPT;tr|E1LBJ8|E1LBJ8_9FIRM	tr|D1BP17|D1BP17_VEIPT	tr|D1BP17|D1BP17_VEIPT 6-phosphogluconolactonase OS=Veillonella parvula (strain ATCC 10790 / DSM 2008 / CCUG 5123 / JCM 12972 / NCTC 11810 / Te3) OX=479436 GN=pgl PE=3 SV=1	15	1456400	4	4	4	4	4	4	20.3	20.3	20.3	28.339	8.2107	7	7
274	tr|D1BQI7|D1BQI7_VEIPT	tr|D1BQI7|D1BQI7_VEIPT	tr|D1BQI7|D1BQI7_VEIPT NAD-dependent epimerase/dehydratase OS=Veillonella parvula (strain ATCC 10790 / DSM 2008 / CCUG 5123 / JCM 12972 / NCTC 11810 / Te3) OX=479436 GN=Vpar_0111 PE=1 SV=1	12	1414900	4	4	4	4	4	4	23.4	23.4	23.4	24.383	4.8192	11	23
275	tr|D1BMZ8|D1BMZ8_VEIPT	tr|D1BMZ8|D1BMZ8_VEIPT	tr|D1BMZ8|D1BMZ8_VEIPT Shikimate kinase OS=Veillonella parvula (strain ATCC 10790 / DSM 2008 / CCUG 5123 / JCM 12972 / NCTC 11810 / Te3) OX=479436 GN=aroK PE=3 SV=1	16	1374100	3	3	3	2	2	2	12.1	12.1	12.1	31.838	4.6224	1	3
276	tr|D1BQ99|D1BQ99_VEIPT	tr|D1BQ99|D1BQ99_VEIPT	tr|D1BQ99|D1BQ99_VEIPT UDP-galactopyranose mutase OS=Veillonella parvula (strain ATCC 10790 / DSM 2008 / CCUG 5123 / JCM 12972 / NCTC 11810 / Te3) OX=479436 GN=Vpar_0023 PE=3 SV=1	24	1332300	2	2	2	1	1	1	8.2	8.2	8.2	42.935	5.9658	1	2
277	tr|E1LCI1|E1LCI1_9FIRM;tr|D1BLP7|D1BLP7_VEIPT	tr|E1LCI1|E1LCI1_9FIRM;tr|D1BLP7|D1BLP7_VEIPT	tr|E1LCI1|E1LCI1_9FIRM 3D domain protein OS=Veillonella atypica ACS-134-V-Col7a OX=866778 GN=HMPREF9684_1668 PE=4 SV=1;tr|D1BLP7|D1BLP7_VEIPT 3D domain protein OS=Veillonella parvula (strain ATCC 10790 / DSM 2008 / CCUG 5123 / JCM 12972 / NCTC 11810 / Te3)	18	1317100	2	2	2	1	1	1	8	8	8	34.244	2.9872	1	2
278	tr|D1BN80|D1BN80_VEIPT;tr|E1LAW1|E1LAW1_9FIRM	tr|D1BN80|D1BN80_VEIPT;tr|E1LAW1|E1LAW1_9FIRM	tr|D1BN80|D1BN80_VEIPT HAD-superfamily hydrolase, subfamily IA, variant 3 OS=Veillonella parvula (strain ATCC 10790 / DSM 2008 / CCUG 5123 / JCM 12972 / NCTC 11810 / Te3) OX=479436 GN=Vpar_1156 PE=4 SV=1;tr|E1LAW1|E1LAW1_9FIRM HAD hydrolase, family IA, var	17	1317100	3	3	3	1	1	1	11.4	11.4	11.4	24.232	2.9476	0	4
279	tr|D1BR68|D1BR68_VEIPT	tr|D1BR68|D1BR68_VEIPT	tr|D1BR68|D1BR68_VEIPT Cell cycle protein OS=Veillonella parvula (strain ATCC 10790 / DSM 2008 / CCUG 5123 / JCM 12972 / NCTC 11810 / Te3) OX=479436 GN=Vpar_0347 PE=4 SV=1	13	1265200	3	3	3	3	3	3	9.2	9.2	9.2	49.729	8.4008	8	8
280	tr|D1BMV0|D1BMV0_VEIPT	tr|D1BMV0|D1BMV0_VEIPT	tr|D1BMV0|D1BMV0_VEIPT Haloacid dehalogenase domain protein hydrolase OS=Veillonella parvula (strain ATCC 10790 / DSM 2008 / CCUG 5123 / JCM 12972 / NCTC 11810 / Te3) OX=479436 GN=Vpar_1026 PE=4 SV=1	10	1262300	2	2	2	1	1	1	12.8	12.8	12.8	25.777	1.9606	1	3
281	tr|D1BN20|D1BN20_VEIPT	tr|D1BN20|D1BN20_VEIPT	tr|D1BN20|D1BN20_VEIPT Threonylcarbamoyl-AMP synthase OS=Veillonella parvula (strain ATCC 10790 / DSM 2008 / CCUG 5123 / JCM 12972 / NCTC 11810 / Te3) OX=479436 GN=Vpar_1096 PE=3 SV=1	17	1226500	1	1	1	1	1	1	4.4	4.4	4.4	37.203	9.7992	1	1
282	tr|D1BNJ9|D1BNJ9_VEIPT	tr|D1BNJ9|D1BNJ9_VEIPT	tr|D1BNJ9|D1BNJ9_VEIPT Uncharacterized protein OS=Veillonella parvula (strain ATCC 10790 / DSM 2008 / CCUG 5123 / JCM 12972 / NCTC 11810 / Te3) OX=479436 GN=Vpar_1276 PE=4 SV=1	13	1220700	5	5	5	3	3	3	26.7	26.7	26.7	22.327	15.701	5	13
283	tr|D1BPR0|D1BPR0_VEIPT	tr|D1BPR0|D1BPR0_VEIPT	tr|D1BPR0|D1BPR0_VEIPT Glycosyl transferase family 39 OS=Veillonella parvula (strain ATCC 10790 / DSM 2008 / CCUG 5123 / JCM 12972 / NCTC 11810 / Te3) OX=479436 GN=Vpar_1691 PE=4 SV=1	18	1171400	3	3	3	1	1	1	5	5	5	61.699	9.5788	3	17
284	tr|D1BPG9|D1BPG9_VEIPT	tr|D1BPG9|D1BPG9_VEIPT	tr|D1BPG9|D1BPG9_VEIPT Lipoprotein OS=Veillonella parvula (strain ATCC 10790 / DSM 2008 / CCUG 5123 / JCM 12972 / NCTC 11810 / Te3) OX=479436 GN=Vpar_1600 PE=3 SV=1	15	1151700	3	3	3	2	2	2	9.7	9.7	9.7	29.481	5.3192	2	5
285	tr|D1BPG7|D1BPG7_VEIPT	tr|D1BPG7|D1BPG7_VEIPT	tr|D1BPG7|D1BPG7_VEIPT Bcr/CflA family efflux transporter OS=Veillonella parvula (strain ATCC 10790 / DSM 2008 / CCUG 5123 / JCM 12972 / NCTC 11810 / Te3) OX=479436 GN=Vpar_1598 PE=3 SV=1	9	1150500	2	2	2	1	1	1	4.6	4.6	4.6	42.205	1.8823	1	4
286	tr|D1BQE6|D1BQE6_VEIPT;tr|E1LB19|E1LB19_9FIRM	tr|D1BQE6|D1BQE6_VEIPT;tr|E1LB19|E1LB19_9FIRM	tr|D1BQE6|D1BQE6_VEIPT ATPase associated with various cellular activities AAA_5 OS=Veillonella parvula (strain ATCC 10790 / DSM 2008 / CCUG 5123 / JCM 12972 / NCTC 11810 / Te3) OX=479436 GN=Vpar_0070 PE=4 SV=1;tr|E1LB19|E1LB19_9FIRM ATPase family associate	17	1144100	4	4	4	4	4	4	13.9	13.9	13.9	33.822	3.0391	8	10
287	tr|D1BPI2|D1BPI2_VEIPT	tr|D1BPI2|D1BPI2_VEIPT	tr|D1BPI2|D1BPI2_VEIPT Chorismate synthase OS=Veillonella parvula (strain ATCC 10790 / DSM 2008 / CCUG 5123 / JCM 12972 / NCTC 11810 / Te3) OX=479436 GN=aroC PE=3 SV=1	18	1140000	2	2	1	2	2	1	5.8	5.8	3	39.094	20.295	2	2
288	tr|D1BNU6|D1BNU6_VEIPT;tr|E1L9E5|E1L9E5_9FIRM	tr|D1BNU6|D1BNU6_VEIPT;tr|E1L9E5|E1L9E5_9FIRM	tr|D1BNU6|D1BNU6_VEIPT Nuclease SbcCD subunit D OS=Veillonella parvula (strain ATCC 10790 / DSM 2008 / CCUG 5123 / JCM 12972 / NCTC 11810 / Te3) OX=479436 GN=sbcD PE=3 SV=1;tr|E1L9E5|E1L9E5_9FIRM Nuclease SbcCD subunit D OS=Veillonella atypica ACS-134-V-Co	25	1121300	2	2	2	2	2	2	6.2	6.2	6.2	51.346	2.2213	2	2
289	tr|D1BLS5|D1BLS5_VEIPT	tr|D1BLS5|D1BLS5_VEIPT	tr|D1BLS5|D1BLS5_VEIPT Uncharacterized protein OS=Veillonella parvula (strain ATCC 10790 / DSM 2008 / CCUG 5123 / JCM 12972 / NCTC 11810 / Te3) OX=479436 GN=Vpar_0649 PE=4 SV=1	9	1095800	2	2	2	1	1	1	15.4	15.4	15.4	21.141	15.563	1	8
290	tr|D1BLT1|D1BLT1_VEIPT	tr|D1BLT1|D1BLT1_VEIPT	tr|D1BLT1|D1BLT1_VEIPT Ribonuclease H OS=Veillonella parvula (strain ATCC 10790 / DSM 2008 / CCUG 5123 / JCM 12972 / NCTC 11810 / Te3) OX=479436 GN=Vpar_0655 PE=3 SV=1	14	1022400	1	1	1	1	1	1	4.6	4.6	4.6	26.903	2.0024	1	1
291	tr|D1BPK0|D1BPK0_VEIPT	tr|D1BPK0|D1BPK0_VEIPT	tr|D1BPK0|D1BPK0_VEIPT Pseudouridine synthase OS=Veillonella parvula (strain ATCC 10790 / DSM 2008 / CCUG 5123 / JCM 12972 / NCTC 11810 / Te3) OX=479436 GN=Vpar_1631 PE=4 SV=1	21	991210	1	1	1	1	1	1	3.2	3.2	3.2	41.714	23.384	1	1
292	tr|D1BMW2|D1BMW2_VEIPT	tr|D1BMW2|D1BMW2_VEIPT	tr|D1BMW2|D1BMW2_VEIPT tRNA N6-adenosine threonylcarbamoyltransferase OS=Veillonella parvula (strain ATCC 10790 / DSM 2008 / CCUG 5123 / JCM 12972 / NCTC 11810 / Te3) OX=479436 GN=tsaD PE=3 SV=1	18	960220	4	4	2	3	3	2	11.7	11.7	5.5	36.703	3.3284	2	7
293	tr|D1BPK1|D1BPK1_VEIPT	tr|D1BPK1|D1BPK1_VEIPT	tr|D1BPK1|D1BPK1_VEIPT DNA helicase OS=Veillonella parvula (strain ATCC 10790 / DSM 2008 / CCUG 5123 / JCM 12972 / NCTC 11810 / Te3) OX=479436 GN=Vpar_1632 PE=3 SV=1	53	951910	8	8	8	5	5	5	8.2	8.2	8.2	99.016	9.5305	7	11
294	tr|E1LDG5|E1LDG5_9FIRM;tr|D1BQH1|D1BQH1_VEIPT	tr|E1LDG5|E1LDG5_9FIRM;tr|D1BQH1|D1BQH1_VEIPT	tr|E1LDG5|E1LDG5_9FIRM 3-isopropylmalate dehydratase large subunit OS=Veillonella atypica ACS-134-V-Col7a OX=866778 GN=leuC PE=3 SV=1;tr|D1BQH1|D1BQH1_VEIPT 3-isopropylmalate dehydratase large subunit OS=Veillonella parvula (strain ATCC 10790 / DSM 2008 /	24	920600	2	2	2	1	1	1	5	5	5	45.606	2.6377	1	2
295	tr|D1BPU3|D1BPU3_VEIPT	tr|D1BPU3|D1BPU3_VEIPT	tr|D1BPU3|D1BPU3_VEIPT Phosphatidylglycerophosphatase A OS=Veillonella parvula (strain ATCC 10790 / DSM 2008 / CCUG 5123 / JCM 12972 / NCTC 11810 / Te3) OX=479436 GN=Vpar_1724 PE=4 SV=1	10	909410	1	1	1	1	1	1	4.7	4.7	4.7	18.928	1.8427	1	1
296	tr|D1BN53|D1BN53_VEIPT	tr|D1BN53|D1BN53_VEIPT	tr|D1BN53|D1BN53_VEIPT Cobyrinate a,c-diamide synthase OS=Veillonella parvula (strain ATCC 10790 / DSM 2008 / CCUG 5123 / JCM 12972 / NCTC 11810 / Te3) OX=479436 GN=cbiA PE=3 SV=1	23	906370	3	3	2	2	2	2	6.8	6.8	4.8	49.593	6.2415	2	7
297	tr|D1BM35|D1BM35_VEIPT	tr|D1BM35|D1BM35_VEIPT	tr|D1BM35|D1BM35_VEIPT Exonuclease RNase T and DNA polymerase III OS=Veillonella parvula (strain ATCC 10790 / DSM 2008 / CCUG 5123 / JCM 12972 / NCTC 11810 / Te3) OX=479436 GN=Vpar_0761 PE=4 SV=1	15	893510	2	2	2	2	2	2	5.8	5.8	5.8	38.672	2.0954	3	3
298	tr|D1BQ56|D1BQ56_VEIPT	tr|D1BQ56|D1BQ56_VEIPT	tr|D1BQ56|D1BQ56_VEIPT Nitroreductase OS=Veillonella parvula (strain ATCC 10790 / DSM 2008 / CCUG 5123 / JCM 12972 / NCTC 11810 / Te3) OX=479436 GN=Vpar_1839 PE=4 SV=1	7	891500	1	1	1	1	1	1	6.9	6.9	6.9	19.469	2.4065	1	1
299	tr|D1BMT1|D1BMT1_VEIPT	tr|D1BMT1|D1BMT1_VEIPT	tr|D1BMT1|D1BMT1_VEIPT Uncharacterized protein OS=Veillonella parvula (strain ATCC 10790 / DSM 2008 / CCUG 5123 / JCM 12972 / NCTC 11810 / Te3) OX=479436 GN=Vpar_1007 PE=4 SV=1	8	870580	1	1	1	1	1	1	7.2	7.2	7.2	17.785	39.009	3	20
300	tr|E1LD22|E1LD22_9FIRM	tr|E1LD22|E1LD22_9FIRM	tr|E1LD22|E1LD22_9FIRM Uncharacterized protein OS=Veillonella atypica ACS-134-V-Col7a OX=866778 GN=HMPREF9684_0355 PE=4 SV=1	12	865830	2	2	1	1	1	1	6.2	6.2	4	31.949	2.1513	0	2
301	tr|D1BPC5|D1BPC5_VEIPT	tr|D1BPC5|D1BPC5_VEIPT	tr|D1BPC5|D1BPC5_VEIPT NUDIX hydrolase OS=Veillonella parvula (strain ATCC 10790 / DSM 2008 / CCUG 5123 / JCM 12972 / NCTC 11810 / Te3) OX=479436 GN=Vpar_1556 PE=4 SV=1	8	846620	1	1	1	1	1	1	9.7	9.7	9.7	15.337	1.9287	4	4
302	tr|D1BM53|D1BM53_VEIPT	tr|D1BM53|D1BM53_VEIPT	tr|D1BM53|D1BM53_VEIPT Dephospho-CoA kinase OS=Veillonella parvula (strain ATCC 10790 / DSM 2008 / CCUG 5123 / JCM 12972 / NCTC 11810 / Te3) OX=479436 GN=coaE PE=3 SV=1	11	826020	1	1	1	1	1	1	6	6	6	22.839	1.801	1	1
303	tr|D1BNT6|D1BNT6_VEIPT	tr|D1BNT6|D1BNT6_VEIPT	tr|D1BNT6|D1BNT6_VEIPT ABC transporter related protein OS=Veillonella parvula (strain ATCC 10790 / DSM 2008 / CCUG 5123 / JCM 12972 / NCTC 11810 / Te3) OX=479436 GN=Vpar_1365 PE=4 SV=1	42	789610	4	4	4	4	4	4	6.2	6.2	6.2	66.786	4.2514	4	4
304	tr|D1BN44|D1BN44_VEIPT	tr|D1BN44|D1BN44_VEIPT	tr|D1BN44|D1BN44_VEIPT Transcriptional regulator MraZ OS=Veillonella parvula (strain ATCC 10790 / DSM 2008 / CCUG 5123 / JCM 12972 / NCTC 11810 / Te3) OX=479436 GN=mraZ PE=3 SV=1	10	787270	2	2	2	1	1	1	14	14	14	16.136	3.2666	1	4
305	tr|D1BLK6|D1BLK6_VEIPT	tr|D1BLK6|D1BLK6_VEIPT	tr|D1BLK6|D1BLK6_VEIPT Ribosome maturation factor RimM OS=Veillonella parvula (strain ATCC 10790 / DSM 2008 / CCUG 5123 / JCM 12972 / NCTC 11810 / Te3) OX=479436 GN=rimM PE=3 SV=1	9	784040	2	2	1	1	1	1	12.7	12.7	6.1	18.818	2.2876	1	7
306	tr|D1BPB6|D1BPB6_VEIPT	tr|D1BPB6|D1BPB6_VEIPT	tr|D1BPB6|D1BPB6_VEIPT 4-diphosphocytidyl-2-C-methyl-D-erythritol kinase OS=Veillonella parvula (strain ATCC 10790 / DSM 2008 / CCUG 5123 / JCM 12972 / NCTC 11810 / Te3) OX=479436 GN=ispE PE=3 SV=1	19	766280	4	4	4	3	3	3	13.1	13.1	13.1	32.4	2.8858	3	6
307	tr|D1BMJ3|D1BMJ3_VEIPT	tr|D1BMJ3|D1BMJ3_VEIPT	tr|D1BMJ3|D1BMJ3_VEIPT Exodeoxyribonuclease 7 large subunit OS=Veillonella parvula (strain ATCC 10790 / DSM 2008 / CCUG 5123 / JCM 12972 / NCTC 11810 / Te3) OX=479436 GN=xseA PE=3 SV=1	24	733570	2	2	2	2	2	2	7.9	7.9	7.9	45.038	3.1144	3	3
308	tr|D1BQR6|D1BQR6_VEIPT	tr|D1BQR6|D1BQR6_VEIPT	tr|D1BQR6|D1BQR6_VEIPT Uncharacterized protein OS=Veillonella parvula (strain ATCC 10790 / DSM 2008 / CCUG 5123 / JCM 12972 / NCTC 11810 / Te3) OX=479436 GN=Vpar_0192 PE=4 SV=1	22	729370	3	3	3	3	3	3	6.4	6.4	6.4	42.902	1.7831	4	4
309	tr|D1BNH7|D1BNH7_VEIPT	tr|D1BNH7|D1BNH7_VEIPT	tr|D1BNH7|D1BNH7_VEIPT Polyprenyl synthetase OS=Veillonella parvula (strain ATCC 10790 / DSM 2008 / CCUG 5123 / JCM 12972 / NCTC 11810 / Te3) OX=479436 GN=Vpar_1254 PE=3 SV=1	20	566160	5	5	5	3	3	3	19.2	19.2	19.2	36.074	54.395	3	8
310	tr|D1BQY9|D1BQY9_VEIPT	tr|D1BQY9|D1BQY9_VEIPT	tr|D1BQY9|D1BQY9_VEIPT Homoserine O-acetyltransferase OS=Veillonella parvula (strain ATCC 10790 / DSM 2008 / CCUG 5123 / JCM 12972 / NCTC 11810 / Te3) OX=479436 GN=metAA PE=3 SV=1	17	564590	1	1	1	1	1	1	3.1	3.1	3.1	37.619	2.4121	2	2
311	tr|D1BQA7|D1BQA7_VEIPT	tr|D1BQA7|D1BQA7_VEIPT	tr|D1BQA7|D1BQA7_VEIPT Uncharacterized protein OS=Veillonella parvula (strain ATCC 10790 / DSM 2008 / CCUG 5123 / JCM 12972 / NCTC 11810 / Te3) OX=479436 GN=Vpar_0031 PE=4 SV=1	22	509200	3	3	3	1	1	1	5.8	5.8	5.8	58.053	2.3418	3	10
312	tr|D1BLU6|D1BLU6_VEIPT	tr|D1BLU6|D1BLU6_VEIPT	tr|D1BLU6|D1BLU6_VEIPT Lipopolysaccharide biosynthesis protein OS=Veillonella parvula (strain ATCC 10790 / DSM 2008 / CCUG 5123 / JCM 12972 / NCTC 11810 / Te3) OX=479436 GN=Vpar_0670 PE=4 SV=1	29	444160	8	8	7	1	1	1	21	21	19.8	53.173	196.57	0	13
313	tr|D1BM55|D1BM55_VEIPT	tr|D1BM55|D1BM55_VEIPT	tr|D1BM55|D1BM55_VEIPT Uncharacterized protein OS=Veillonella parvula (strain ATCC 10790 / DSM 2008 / CCUG 5123 / JCM 12972 / NCTC 11810 / Te3) OX=479436 GN=Vpar_0781 PE=4 SV=1	15	442620	2	2	2	2	2	2	8.7	8.7	8.7	27.019	2.4568	2	3
314	tr|D1BLI8|D1BLI8_VEIPT	tr|D1BLI8|D1BLI8_VEIPT	tr|D1BLI8|D1BLI8_VEIPT ATPase involved in DNA repair-like protein OS=Veillonella parvula (strain ATCC 10790 / DSM 2008 / CCUG 5123 / JCM 12972 / NCTC 11810 / Te3) OX=479436 GN=Vpar_0562 PE=4 SV=1	49	349840	4	4	4	2	2	2	3.8	3.8	3.8	112.73	5.97	2	5
315	tr|D1BQ68|D1BQ68_VEIPT	tr|D1BQ68|D1BQ68_VEIPT	tr|D1BQ68|D1BQ68_VEIPT Methylenetetrahydrofolate reductase OS=Veillonella parvula (strain ATCC 10790 / DSM 2008 / CCUG 5123 / JCM 12972 / NCTC 11810 / Te3) OX=479436 GN=Vpar_1851 PE=3 SV=1	16	342670	3	3	2	2	2	1	9.8	9.8	7	31.403	3.6318	2	6
316	tr|E1LDR3|E1LDR3_9FIRM	tr|E1LDR3|E1LDR3_9FIRM	tr|E1LDR3|E1LDR3_9FIRM Type III restriction enzyme, res subunit OS=Veillonella atypica ACS-134-V-Col7a OX=866778 GN=HMPREF9684_1319 PE=4 SV=1	60	338190	3	3	3	1	1	1	3.1	3.1	3.1	95.508	2.2742	1	4
317	tr|D1BQN0|D1BQN0_VEIPT	tr|D1BQN0|D1BQN0_VEIPT	tr|D1BQN0|D1BQN0_VEIPT C4-dicarboxylate anaerobic carrier OS=Veillonella parvula (strain ATCC 10790 / DSM 2008 / CCUG 5123 / JCM 12972 / NCTC 11810 / Te3) OX=479436 GN=Vpar_0155 PE=3 SV=1	11	335970	2	2	2	1	1	1	4.6	4.6	4.6	42.955	14.004	1	5
318	tr|D1BP33|D1BP33_VEIPT	tr|D1BP33|D1BP33_VEIPT	tr|D1BP33|D1BP33_VEIPT Energy-coupling factor transporter ATP-binding protein EcfA2 OS=Veillonella parvula (strain ATCC 10790 / DSM 2008 / CCUG 5123 / JCM 12972 / NCTC 11810 / Te3) OX=479436 GN=Vpar_1464 PE=3 SV=1	14	317290	4	4	3	2	2	2	15.4	15.4	11.5	31.408	11.289	1	14
319	tr|D1BR03|D1BR03_VEIPT	tr|D1BR03|D1BR03_VEIPT	tr|D1BR03|D1BR03_VEIPT Metal dependent phosphohydrolase OS=Veillonella parvula (strain ATCC 10790 / DSM 2008 / CCUG 5123 / JCM 12972 / NCTC 11810 / Te3) OX=479436 GN=Vpar_0282 PE=4 SV=1	13	312170	4	4	4	1	1	1	20.3	20.3	20.3	23.132	2.5534	0	5
320	tr|D1BL14|D1BL14_VEIPT	tr|D1BL14|D1BL14_VEIPT	tr|D1BL14|D1BL14_VEIPT Phosphoglycerate transporter OS=Veillonella parvula (strain ATCC 10790 / DSM 2008 / CCUG 5123 / JCM 12972 / NCTC 11810 / Te3) OX=479436 GN=Vpar_0387 PE=3 SV=1	14	168660	2	2	2	1	1	1	5.7	5.7	5.7	50.67	10.972	0	14
321	tr|D1BQ45|D1BQ45_VEIPT	tr|D1BQ45|D1BQ45_VEIPT	tr|D1BQ45|D1BQ45_VEIPT ATPase OS=Veillonella parvula (strain ATCC 10790 / DSM 2008 / CCUG 5123 / JCM 12972 / NCTC 11810 / Te3) OX=479436 GN=Vpar_1828 PE=4 SV=1	23	118440	3	3	3	1	1	1	7.3	7.3	7.3	39.996	3.553	0	9
322	tr|E1LAF9|E1LAF9_9FIRM	tr|E1LAF9|E1LAF9_9FIRM	tr|E1LAF9|E1LAF9_9FIRM Putative cell division protein FtsL OS=Veillonella atypica ACS-134-V-Col7a OX=866778 GN=HMPREF9684_1914 PE=4 SV=1	8	0	3	1	1	1	0	0	25.9	13.9	13.9	12.952	2.0358	0	1
323	tr|E1LA86|E1LA86_9FIRM	tr|E1LA86|E1LA86_9FIRM	tr|E1LA86|E1LA86_9FIRM Uncharacterized protein OS=Veillonella atypica ACS-134-V-Col7a OX=866778 GN=HMPREF9684_1356 PE=4 SV=1	4	0	1	1	1	0	0	0	14.1	14.1	14.1	7.6879	-2	0	0
324	tr|E1L920|E1L920_9FIRM	tr|E1L920|E1L920_9FIRM	tr|E1L920|E1L920_9FIRM Uncharacterized protein OS=Veillonella atypica ACS-134-V-Col7a OX=866778 GN=HMPREF9684_0867 PE=4 SV=1	6	0	1	1	1	0	0	0	6	6	6	22.557	1.817	0	1
325	tr|E1LE67|E1LE67_9FIRM	tr|E1LE67|E1LE67_9FIRM	tr|E1LE67|E1LE67_9FIRM Probable cell division protein WhiA OS=Veillonella atypica ACS-134-V-Col7a OX=866778 GN=whiA PE=3 SV=1	25	0	3	3	2	1	1	1	9.5	9.5	6.3	35.465	2.0147	1	4
326	tr|E1LCJ1|E1LCJ1_9FIRM	tr|E1LCJ1|E1LCJ1_9FIRM	tr|E1LCJ1|E1LCJ1_9FIRM Uncharacterized protein OS=Veillonella atypica ACS-134-V-Col7a OX=866778 GN=HMPREF9684_1778 PE=4 SV=1	4	0	1	1	1	0	0	0	4.6	4.6	4.6	18.005	-2	0	0
327	tr|D1BR33|D1BR33_VEIPT;tr|E1L9U2|E1L9U2_9FIRM	tr|D1BR33|D1BR33_VEIPT;tr|E1L9U2|E1L9U2_9FIRM	tr|D1BR33|D1BR33_VEIPT Hydroxymethylpyrimidine transporter CytX OS=Veillonella parvula (strain ATCC 10790 / DSM 2008 / CCUG 5123 / JCM 12972 / NCTC 11810 / Te3) OX=479436 GN=Vpar_0312 PE=3 SV=1;tr|E1L9U2|E1L9U2_9FIRM Putative hydroxymethylpyrimidine transp	3	0	1	1	1	1	1	1	4.3	4.3	4.3	42.6	4.9429	0	0
328	tr|E1LBH8|E1LBH8_9FIRM	tr|E1LBH8|E1LBH8_9FIRM	tr|E1LBH8|E1LBH8_9FIRM Precorrin-2 dehydrogenase OS=Veillonella atypica ACS-134-V-Col7a OX=866778 GN=HMPREF9684_0589 PE=4 SV=1	13	0	2	2	2	1	1	1	8.4	8.4	8.4	24.354	-2	0	1
329	tr|E1LA96|E1LA96_9FIRM	tr|E1LA96|E1LA96_9FIRM	tr|E1LA96|E1LA96_9FIRM ATPase_AAA_core domain-containing protein OS=Veillonella atypica ACS-134-V-Col7a OX=866778 GN=HMPREF9684_0858 PE=4 SV=1	29	0	2	2	2	0	0	0	4.1	4.1	4.1	48.075	3.0937	0	7
330	tr|D1BPK3|D1BPK3_VEIPT	tr|D1BPK3|D1BPK3_VEIPT	tr|D1BPK3|D1BPK3_VEIPT Recombination protein RecR OS=Veillonella parvula (strain ATCC 10790 / DSM 2008 / CCUG 5123 / JCM 12972 / NCTC 11810 / Te3) OX=479436 GN=recR PE=3 SV=1	12	0	3	3	2	0	0	0	12.1	12.1	9.1	21.67	2.139	0	5
331	tr|E1L9J3|E1L9J3_9FIRM	tr|E1L9J3|E1L9J3_9FIRM	tr|E1L9J3|E1L9J3_9FIRM Demethylmenaquinone methyltransferase OS=Veillonella atypica ACS-134-V-Col7a OX=866778 GN=menG PE=3 SV=1	14	0	1	1	1	0	0	0	3.6	3.6	3.6	28.342	-2	0	0
332	tr|E1LDP5|E1LDP5_9FIRM;tr|D1BQT4|D1BQT4_VEIPT	tr|E1LDP5|E1LDP5_9FIRM;tr|D1BQT4|D1BQT4_VEIPT	tr|E1LDP5|E1LDP5_9FIRM Lactamase_B domain-containing protein OS=Veillonella atypica ACS-134-V-Col7a OX=866778 GN=HMPREF9684_1300 PE=4 SV=1;tr|D1BQT4|D1BQT4_VEIPT Lactamase_B domain-containing protein OS=Veillonella parvula (strain ATCC 10790 / DSM 2008 / C	8	0	1	1	1	0	0	0	3.4	3.4	3.4	28.945	-2	0	0
333	tr|D1BMT5|D1BMT5_VEIPT;tr|E1LAT7|E1LAT7_9FIRM	tr|D1BMT5|D1BMT5_VEIPT;tr|E1LAT7|E1LAT7_9FIRM	tr|D1BMT5|D1BMT5_VEIPT RNA polymerase, sigma-24 subunit, ECF subfamily OS=Veillonella parvula (strain ATCC 10790 / DSM 2008 / CCUG 5123 / JCM 12972 / NCTC 11810 / Te3) OX=479436 GN=Vpar_1011 PE=4 SV=1;tr|E1LAT7|E1LAT7_9FIRM RNA polymerase sigma-H factor OS	14	0	4	4	4	1	1	1	14.3	14.3	14.3	26.056	2.8657	0	4
334	tr|E1LAP4|E1LAP4_9FIRM	tr|E1LAP4|E1LAP4_9FIRM	tr|E1LAP4|E1LAP4_9FIRM Glycosyl hydrolase, family 18 OS=Veillonella atypica ACS-134-V-Col7a OX=866778 GN=HMPREF9684_0228 PE=4 SV=1	26	0	1	1	1	1	1	1	3	3	3	60.176	-2	0	0
335	tr|E1L9Z1|E1L9Z1_9FIRM	tr|E1L9Z1|E1L9Z1_9FIRM	tr|E1L9Z1|E1L9Z1_9FIRM Chorismate synthase OS=Veillonella atypica ACS-134-V-Col7a OX=866778 GN=aroC PE=3 SV=1	19	0	2	1	1	1	0	0	5.8	3	3	38.809	2.4925	1	2
336	tr|E1LBX7|E1LBX7_9FIRM	tr|E1LBX7|E1LBX7_9FIRM	tr|E1LBX7|E1LBX7_9FIRM Pseudouridine synthase OS=Veillonella atypica ACS-134-V-Col7a OX=866778 GN=HMPREF9684_0463 PE=3 SV=1	14	0	3	3	2	0	0	0	9.8	9.8	7.2	34.299	4.4292	0	3
337	tr|E1LB84|E1LB84_9FIRM	tr|E1LB84|E1LB84_9FIRM	tr|E1LB84|E1LB84_9FIRM Pyrimidine-nucleoside phosphorylase OS=Veillonella atypica ACS-134-V-Col7a OX=866778 GN=pdp PE=3 SV=1	22	0	1	1	1	0	0	0	2.5	2.5	2.5	45.93	2.2423	0	1
338	tr|D1BQS0|D1BQS0_VEIPT	tr|D1BQS0|D1BQS0_VEIPT	tr|D1BQS0|D1BQS0_VEIPT Periplasmic binding protein OS=Veillonella parvula (strain ATCC 10790 / DSM 2008 / CCUG 5123 / JCM 12972 / NCTC 11810 / Te3) OX=479436 GN=Vpar_0196 PE=4 SV=1	26	0	2	2	2	0	0	0	4.9	4.9	4.9	43.66	3.1243	0	3
339	tr|D1BR29|D1BR29_VEIPT;tr|E1L9T8|E1L9T8_9FIRM	tr|D1BR29|D1BR29_VEIPT;tr|E1L9T8|E1L9T8_9FIRM	tr|D1BR29|D1BR29_VEIPT Auxin Efflux Carrier OS=Veillonella parvula (strain ATCC 10790 / DSM 2008 / CCUG 5123 / JCM 12972 / NCTC 11810 / Te3) OX=479436 GN=Vpar_0308 PE=3 SV=1;tr|E1L9T8|E1L9T8_9FIRM Transporter, auxin efflux carrier (AEC) family protein OS=V	8	0	3	3	3	1	1	1	7	7	7	36.349	2.3224	2	15
340	tr|E1LBR2|E1LBR2_9FIRM	tr|E1LBR2|E1LBR2_9FIRM	tr|E1LBR2|E1LBR2_9FIRM Integrase core domain protein OS=Veillonella atypica ACS-134-V-Col7a OX=866778 GN=HMPREF9684_1058 PE=4 SV=1	26	0	1	1	1	0	0	0	2	2	2	46.383	-2	0	0
341	tr|D1BNQ8|D1BNQ8_VEIPT	tr|D1BNQ8|D1BNQ8_VEIPT	tr|D1BNQ8|D1BNQ8_VEIPT Radical SAM domain protein OS=Veillonella parvula (strain ATCC 10790 / DSM 2008 / CCUG 5123 / JCM 12972 / NCTC 11810 / Te3) OX=479436 GN=Vpar_1337 PE=4 SV=1	30	0	2	2	2	0	0	0	3.3	3.3	3.3	60.492	-2	0	1
342	tr|D1BQR2|D1BQR2_VEIPT	tr|D1BQR2|D1BQR2_VEIPT	tr|D1BQR2|D1BQR2_VEIPT Uncharacterized protein OS=Veillonella parvula (strain ATCC 10790 / DSM 2008 / CCUG 5123 / JCM 12972 / NCTC 11810 / Te3) OX=479436 GN=Vpar_0188 PE=4 SV=1	11	0	2	2	2	2	2	2	12.4	12.4	12.4	20.284	2.599	2	2
343	tr|E1L9J6|E1L9J6_9FIRM	tr|E1L9J6|E1L9J6_9FIRM	tr|E1L9J6|E1L9J6_9FIRM Uncharacterized protein OS=Veillonella atypica ACS-134-V-Col7a OX=866778 GN=HMPREF9684_0570 PE=4 SV=1	5	0	1	1	1	1	1	1	10.3	10.3	10.3	7.5496	-2	0	0
344	tr|D1BMH8|D1BMH8_VEIPT	tr|D1BMH8|D1BMH8_VEIPT	tr|D1BMH8|D1BMH8_VEIPT Uncharacterized protein OS=Veillonella parvula (strain ATCC 10790 / DSM 2008 / CCUG 5123 / JCM 12972 / NCTC 11810 / Te3) OX=479436 GN=Vpar_0904 PE=4 SV=1	6	0	1	1	1	1	1	1	8.1	8.1	8.1	12.765	6.8245	1	1
345	tr|D1BLT2|D1BLT2_VEIPT;tr|E1LC94|E1LC94_9FIRM	tr|D1BLT2|D1BLT2_VEIPT;tr|E1LC94|E1LC94_9FIRM	tr|D1BLT2|D1BLT2_VEIPT NAD-dependent epimerase/dehydratase OS=Veillonella parvula (strain ATCC 10790 / DSM 2008 / CCUG 5123 / JCM 12972 / NCTC 11810 / Te3) OX=479436 GN=Vpar_0656 PE=4 SV=1;tr|E1LC94|E1LC94_9FIRM NAD dependent epimerase/dehydratase family p	16	0	3	3	3	2	2	2	10.1	10.1	10.1	34.044	4.4418	2	5
346	tr|D1BNS1|D1BNS1_VEIPT	tr|D1BNS1|D1BNS1_VEIPT	tr|D1BNS1|D1BNS1_VEIPT ABC transporter related protein OS=Veillonella parvula (strain ATCC 10790 / DSM 2008 / CCUG 5123 / JCM 12972 / NCTC 11810 / Te3) OX=479436 GN=Vpar_1350 PE=4 SV=1	15	0	1	1	1	1	1	1	4.8	4.8	4.8	28.326	2.9166	0	0
347	tr|D1BNY8|D1BNY8_VEIPT	tr|D1BNY8|D1BNY8_VEIPT	tr|D1BNY8|D1BNY8_VEIPT Uncharacterized protein OS=Veillonella parvula (strain ATCC 10790 / DSM 2008 / CCUG 5123 / JCM 12972 / NCTC 11810 / Te3) OX=479436 GN=Vpar_1418 PE=4 SV=1	16	0	1	1	1	1	1	1	4.7	4.7	4.7	29.348	10.391	1	1
348	tr|D1BM48|D1BM48_VEIPT	tr|D1BM48|D1BM48_VEIPT	tr|D1BM48|D1BM48_VEIPT Xanthine/uracil/vitamin C permease OS=Veillonella parvula (strain ATCC 10790 / DSM 2008 / CCUG 5123 / JCM 12972 / NCTC 11810 / Te3) OX=479436 GN=Vpar_0774 PE=3 SV=1	8	0	2	2	2	2	2	2	4.5	4.5	4.5	47.003	6.6061	0	0
349	tr|D1BMC6|D1BMC6_VEIPT	tr|D1BMC6|D1BMC6_VEIPT	tr|D1BMC6|D1BMC6_VEIPT Protein serine/threonine phosphatase OS=Veillonella parvula (strain ATCC 10790 / DSM 2008 / CCUG 5123 / JCM 12972 / NCTC 11810 / Te3) OX=479436 GN=Vpar_0852 PE=4 SV=1	7	0	1	1	1	1	1	1	3.9	3.9	3.9	25.274	2.0054	1	1
350	tr|E1L9W3|E1L9W3_9FIRM	tr|E1L9W3|E1L9W3_9FIRM	tr|E1L9W3|E1L9W3_9FIRM L-asparaginase, type II OS=Veillonella atypica ACS-134-V-Col7a OX=866778 GN=HMPREF9684_0804 PE=3 SV=1	10	0	1	1	1	1	1	1	2.8	2.8	2.8	34.97	-2	0	0
351	tr|D1BQT0|D1BQT0_VEIPT	tr|D1BQT0|D1BQT0_VEIPT	tr|D1BQT0|D1BQT0_VEIPT Putative PAS/PAC sensor protein OS=Veillonella parvula (strain ATCC 10790 / DSM 2008 / CCUG 5123 / JCM 12972 / NCTC 11810 / Te3) OX=479436 GN=Vpar_0206 PE=4 SV=1	36	0	4	4	4	1	1	1	6.7	6.7	6.7	61.112	1.7883	1	5
352	tr|D1BNI7|D1BNI7_VEIPT	tr|D1BNI7|D1BNI7_VEIPT	tr|D1BNI7|D1BNI7_VEIPT Xanthine permease OS=Veillonella parvula (strain ATCC 10790 / DSM 2008 / CCUG 5123 / JCM 12972 / NCTC 11810 / Te3) OX=479436 GN=Vpar_1264 PE=3 SV=1	7	0	1	1	1	1	1	1	1.5	1.5	1.5	48.886	2.1385	0	0
353	tr|D1BLU4|D1BLU4_VEIPT;tr|E1LCA7|E1LCA7_9FIRM	tr|D1BLU4|D1BLU4_VEIPT;tr|E1LCA7|E1LCA7_9FIRM	tr|D1BLU4|D1BLU4_VEIPT Polysaccharide export protein OS=Veillonella parvula (strain ATCC 10790 / DSM 2008 / CCUG 5123 / JCM 12972 / NCTC 11810 / Te3) OX=479436 GN=Vpar_0668 PE=4 SV=1;tr|E1LCA7|E1LCA7_9FIRM Polysaccharide biosynthesis/export protein OS=Veil	14	0	4	4	4	0	0	0	22.7	22.7	22.7	27.299	32.587	0	12
354	tr|D1BL06|D1BL06_VEIPT	tr|D1BL06|D1BL06_VEIPT	tr|D1BL06|D1BL06_VEIPT Thioesterase superfamily protein OS=Veillonella parvula (strain ATCC 10790 / DSM 2008 / CCUG 5123 / JCM 12972 / NCTC 11810 / Te3) OX=479436 GN=Vpar_0379 PE=4 SV=1	8	0	2	2	2	0	0	0	15.2	15.2	15.2	13.636	2.3721	0	5
355	tr|D1BQ07|D1BQ07_VEIPT	tr|D1BQ07|D1BQ07_VEIPT	tr|D1BQ07|D1BQ07_VEIPT Uncharacterized protein OS=Veillonella parvula (strain ATCC 10790 / DSM 2008 / CCUG 5123 / JCM 12972 / NCTC 11810 / Te3) OX=479436 GN=Vpar_1789 PE=4 SV=1	5	0	2	2	2	0	0	0	12.9	12.9	12.9	16.891	4.3194	0	7
356	sp|D1BMT0|BIOW_VEIPT	sp|D1BMT0|BIOW_VEIPT	sp|D1BMT0|BIOW_VEIPT 6-carboxyhexanoate--CoA ligase OS=Veillonella parvula (strain ATCC 10790 / DSM 2008 / CCUG 5123 / JCM 12972 / NCTC 11810 / Te3) OX=479436 GN=bioW PE=3 SV=1	17	0	3	3	3	0	0	0	11.6	11.6	11.6	26.544	3.2765	0	5
357	tr|E1LCL9|E1LCL9_9FIRM	tr|E1LCL9|E1LCL9_9FIRM	tr|E1LCL9|E1LCL9_9FIRM Uncharacterized protein OS=Veillonella atypica ACS-134-V-Col7a OX=866778 GN=HMPREF9684_1806 PE=4 SV=1	7	0	1	1	1	0	0	0	10.4	10.4	10.4	13.806	-2	0	0
358	tr|D1BLU8|D1BLU8_VEIPT	tr|D1BLU8|D1BLU8_VEIPT	tr|D1BLU8|D1BLU8_VEIPT DegT/DnrJ/EryC1/StrS aminotransferase OS=Veillonella parvula (strain ATCC 10790 / DSM 2008 / CCUG 5123 / JCM 12972 / NCTC 11810 / Te3) OX=479436 GN=Vpar_0672 PE=3 SV=1	20	0	4	4	4	0	0	0	10.3	10.3	10.3	44.415	3.2545	0	5
359	tr|E1LD12|E1LD12_9FIRM;tr|D1BPV1|D1BPV1_VEIPT	tr|E1LD12|E1LD12_9FIRM;tr|D1BPV1|D1BPV1_VEIPT	tr|E1LD12|E1LD12_9FIRM Uncharacterized protein OS=Veillonella atypica ACS-134-V-Col7a OX=866778 GN=HMPREF9684_0345 PE=4 SV=1;tr|D1BPV1|D1BPV1_VEIPT Uncharacterized protein OS=Veillonella parvula (strain ATCC 10790 / DSM 2008 / CCUG 5123 / JCM 12972 / NCTC	6	0	2	2	2	0	0	0	8.5	8.5	8.5	17.499	3.39	0	11
360	tr|D1BLQ4|D1BLQ4_VEIPT;tr|E1LCR1|E1LCR1_9FIRM	tr|D1BLQ4|D1BLQ4_VEIPT;tr|E1LCR1|E1LCR1_9FIRM	tr|D1BLQ4|D1BLQ4_VEIPT Peptide chain release factor 3 OS=Veillonella parvula (strain ATCC 10790 / DSM 2008 / CCUG 5123 / JCM 12972 / NCTC 11810 / Te3) OX=479436 GN=prfC PE=3 SV=1;tr|E1LCR1|E1LCR1_9FIRM Peptide chain release factor 3 OS=Veillonella atypica	31	0	3	3	3	0	0	0	6.6	6.6	6.6	59.745	3.3755	0	8
361	tr|D1BM88|D1BM88_VEIPT	tr|D1BM88|D1BM88_VEIPT	tr|D1BM88|D1BM88_VEIPT Gamma-glutamyl phosphate reductase OS=Veillonella parvula (strain ATCC 10790 / DSM 2008 / CCUG 5123 / JCM 12972 / NCTC 11810 / Te3) OX=479436 GN=proA PE=3 SV=1	22	0	2	2	2	0	0	0	5.7	5.7	5.7	46.332	1.9823	0	2
362	tr|D1BM90|D1BM90_VEIPT	tr|D1BM90|D1BM90_VEIPT	tr|D1BM90|D1BM90_VEIPT Bis(5-nucleosyl)-tetraphosphatase (symmetrical) OS=Veillonella parvula (strain ATCC 10790 / DSM 2008 / CCUG 5123 / JCM 12972 / NCTC 11810 / Te3) OX=479436 GN=Vpar_0816 PE=4 SV=1	13	0	1	1	1	0	0	0	5.3	5.3	5.3	21.358	3.1161	0	1
363	tr|D1BP70|D1BP70_VEIPT	tr|D1BP70|D1BP70_VEIPT	tr|D1BP70|D1BP70_VEIPT Choline/carnitine/betaine transporter OS=Veillonella parvula (strain ATCC 10790 / DSM 2008 / CCUG 5123 / JCM 12972 / NCTC 11810 / Te3) OX=479436 GN=Vpar_1501 PE=3 SV=1	14	0	2	2	2	0	0	0	3.9	3.9	3.9	75.19	5.7169	0	6
364	tr|D1BL47|D1BL47_VEIPT	tr|D1BL47|D1BL47_VEIPT	tr|D1BL47|D1BL47_VEIPT Acyl_transf_3 domain-containing protein OS=Veillonella parvula (strain ATCC 10790 / DSM 2008 / CCUG 5123 / JCM 12972 / NCTC 11810 / Te3) OX=479436 GN=Vpar_0420 PE=4 SV=1	8	0	1	1	1	0	0	0	3.5	3.5	3.5	43.261	2.2861	0	3
365	tr|E1LEB3|E1LEB3_9FIRM;tr|D1BNM7|D1BNM7_VEIPT	tr|E1LEB3|E1LEB3_9FIRM;tr|D1BNM7|D1BNM7_VEIPT	tr|E1LEB3|E1LEB3_9FIRM Aminotransferase, acetylornithine/succinylornithine family OS=Veillonella atypica ACS-134-V-Col7a OX=866778 GN=argD PE=3 SV=1;tr|D1BNM7|D1BNM7_VEIPT Acetylornithine and succinylornithine aminotransferase OS=Veillonella parvula (strai	21	0	1	1	1	0	0	0	3.5	3.5	3.5	42.612	1.7786	0	2
366	tr|E1LD03|E1LD03_9FIRM;tr|D1BPU0|D1BPU0_VEIPT	tr|E1LD03|E1LD03_9FIRM;tr|D1BPU0|D1BPU0_VEIPT	tr|E1LD03|E1LD03_9FIRM Hemerythrin HHE cation binding domain protein OS=Veillonella atypica ACS-134-V-Col7a OX=866778 GN=HMPREF9684_0335 PE=4 SV=1;tr|D1BPU0|D1BPU0_VEIPT Uncharacterized protein OS=Veillonella parvula (strain ATCC 10790 / DSM 2008 / CCUG 51	34	0	1	1	1	0	0	0	1.7	1.7	1.7	58.43	-2	0	2
