# Supplementary material for: The Gut Commensal Bacteria Veillonella parvula-Induced Neutrophil Activation Mediates Antitumor Activity
Source: Research Square preprint supplement (doi:10.21203/rs.3.rs-7615171/v1), 2025-10-16
Supplement: Supplementary file 4 [file e303cd962627d40940368e16.xlsx]

## Sheet: Supp Table 4
Supplementary Table 4. SYBR green primer sequences used for qRT-PCR
Target gene	Forward primer sequence (5’–3’)	Reverse primer sequence (5’–3’)
mouse b-actin	5'-CAT TGC TGA CAG GAT GCA GAA GG-3'	5'-ACT CTG GCT TGC TGA TCC ACA T-3'
mouse Tlr1	5'-TCA AGT GTG CAG CTG ATT GC-3'	5'-TAG TGC TGA CGG ACA CAT CC-3'
mouse Tlr2	5'-CAG CTG GAG AAC TCT GAC CC-3'	5'-CAA AGA GCC TGA AGT GGG AG-3'
mouse Tlr4	5'-CAA CAT CAT CCA GGA AGG C-3'	5'-GAA GGC GAT ACA ATT CCA CC-3'
mouse Tlr5	5'-AGC ATT CTC ATC GTG GTG G-3'	5'-AAT GGT TGC TAT GGT TCG C-3'
mouse Tlr6	5'-TGG ATG TCT CAC ACA ATC GG-3'	5'-GCA GCT TAG ATG CAA GTG AGC-3'
mouse Tlr9	5'-CAA GAA CCT GGT GTC ACT GC-3'	5'-TGC GAT TGT CTG ACA AGT CC-3'
mouse Nod1	5'-CCA AGC CTG ACA AGG TCC GAA AG-3'	5'-GAA TGA GCT GGG AAG GGG AGA AG-3'
mouse Nod2	5'-GGG TTT CTG AGC CAG TAC GAG TG-3'	5'-CTG ACG TGC TGT AGA AGG AAG GC-3'
