# Supplementary material for: The Gut Commensal Bacteria Veillonella parvula-Induced Neutrophil Activation Mediates Antitumor Activity
Source: Research Square preprint supplement (doi:10.21203/rs.3.rs-7615171/v1), 2025-10-16
Supplement: Supplementary file 5 [file e365c9f8314c309a710c4dbe.xlsx]

## Sheet: Supp Table 2
Supplementary Table 2. Gene markers used for characterization of neutrophil populations in single cell analysis
clusters	gene	p_val	avg_log2FC	pct.1	pct.2	p_val_adj
clusters_0	Pglyrp1	4.0282e-51	-1.43497	0.434	0.984	9.79538e-47
clusters_0	Cd177	2.69747e-50	-2.26795	0.124	0.797	6.55944e-46
clusters_0	Ngp	1.61982e-48	-2.07678	0.317	0.918	3.93891e-44
clusters_0	Cd14	4.1924e-48	-1.59836	0.534	0.995	1.01946e-43
clusters_0	Alox5ap	3.46832e-45	-1.27289	0.558	0.992	8.43391e-41
clusters_0	Ifitm6	4.17272e-44	-1.53619	0.434	0.967	1.01468e-39
clusters_0	S100a8	5.167e-44	-1.30534	0.92	1	1.25646e-39
clusters_0	Mmp8	5.27051e-44	-1.69374	0.313	0.94	1.28163e-39
clusters_0	Lrg1	3.44292e-43	-1.7077	0.289	0.91	8.37216e-39
clusters_0	Chil3	1.63977e-41	-2.13792	0.269	0.833	3.98743e-37
clusters_0	Qsox1	6.27633e-40	-1.43963	0.193	0.833	1.52622e-35
clusters_0	Retnlg	9.32084e-40	-1.33361	0.586	0.981	2.26655e-35
clusters_0	Sqor	3.74521e-39	-3.66504	0.028	0.556	9.10723e-35
clusters_0	Lcn2	1.12733e-38	-0.938198	0.667	1	2.74133e-34
clusters_0	Mmp9	2.2218e-37	-1.32919	0.281	0.885	5.40275e-33
clusters_0	Wfdc21	5.33507e-37	-1.1688	0.494	0.984	1.29733e-32
clusters_0	Lipg	9.01351e-37	-1.43696	0.157	0.764	2.19181e-32
clusters_0	S100a9	5.96974e-36	-1.12047	0.904	0.997	1.45166e-31
clusters_0	Dach1	7.07228e-35	-0.935734	0.193	0.797	1.71977e-30
clusters_0	Anxa1	1.29604e-34	-1.29342	0.365	0.937	3.15158e-30
clusters_0	Pnkp	2.2713e-34	-1.54518	0.116	0.671	5.52312e-30
clusters_0	Ly6g	1.04526e-33	-1.87581	0.088	0.608	2.54175e-29
clusters_0	Gm42418	4.47899e-33	1.50079	0.964	0.995	1.08916e-28
clusters_0	Trem1	1.03643e-32	-1.24155	0.337	0.915	2.52029e-28
clusters_0	Fpr1	3.8763e-32	-1.14075	0.245	0.847	9.426e-28
clusters_0	Dstn	2.56269e-31	-1.24994	0.261	0.83	6.23169e-27
clusters_0	Camp	7.60589e-31	-2.34748	0.112	0.611	1.84952e-26
clusters_0	Hck	8.69294e-31	-1.10925	0.245	0.827	2.11386e-26
clusters_0	Pygl	9.63723e-31	-1.04052	0.253	0.852	2.34349e-26
clusters_0	Ly6c2	1.35046e-30	-1.27462	0.249	0.833	3.2839e-26
clusters_0	Pira2	1.50009e-30	-1.19063	0.161	0.707	3.64778e-26
clusters_0	R3hdm4	1.93204e-30	-1.22585	0.157	0.693	4.69815e-26
clusters_0	Cnn2	3.31264e-30	-0.826678	0.137	0.677	8.05535e-26
clusters_0	Napsa	1.08058e-29	-1.0362	0.181	0.74	2.62764e-25
clusters_0	Smpdl3a	1.20625e-29	-1.47776	0.088	0.567	2.93324e-25
clusters_0	Ltb4r1	1.70009e-29	-1.29514	0.092	0.581	4.1341e-25
clusters_0	Vsir	4.80626e-29	-1.47146	0.108	0.608	1.16874e-24
clusters_0	Rab5if	5.45674e-29	-0.950348	0.201	0.764	1.32692e-24
clusters_0	Prok2	6.90421e-29	-1.50431	0.153	0.668	1.6789e-24
clusters_0	Wfdc17	1.0556e-28	-1.07558	0.59	0.984	2.56691e-24
clusters_0	Tlr2	1.38577e-28	-1.55601	0.096	0.57	3.36978e-24
clusters_0	Cxcr2	1.61001e-28	-1.05123	0.273	0.858	3.91506e-24
clusters_0	Atxn10	1.92688e-28	-0.740775	0.193	0.756	4.68559e-24
clusters_0	Lrrk2	2.01737e-28	-1.01972	0.124	0.627	4.90564e-24
clusters_0	Chil1	2.60534e-28	-0.775005	0.225	0.784	6.3354e-24
clusters_0	Gyg	4.22006e-28	-0.787507	0.124	0.622	1.02619e-23
clusters_0	Glrx	4.88324e-28	-0.985118	0.237	0.803	1.18746e-23
clusters_0	Ckap4	1.59539e-27	-1.62442	0.072	0.499	3.8795e-23
clusters_0	Fpr2	4.10931e-27	-0.749882	0.249	0.83	9.9926e-23
clusters_0	Cd24a	1.72578e-26	-0.712782	0.197	0.751	4.19658e-22
clusters_0	Ltf	1.9838e-26	-1.62779	0.104	0.545	4.824e-22
clusters_0	Glipr2	2.17832e-26	-0.779191	0.205	0.748	5.29703e-22
clusters_0	Flot1	2.47421e-26	-1.05831	0.169	0.671	6.01654e-22
clusters_0	C5ar1	5.16038e-26	-0.763661	0.281	0.86	1.25485e-21
clusters_0	Hp	6.26233e-26	-0.87324	0.486	0.967	1.52281e-21
clusters_0	Lbr	7.73249e-26	-1.18945	0.145	0.616	1.88031e-21
clusters_0	Pcmt1	9.08288e-26	-1.05071	0.157	0.655	2.20868e-21
clusters_0	Sri	1.3456e-25	-0.747972	0.273	0.849	3.2721e-21
clusters_0	Flna	1.64543e-25	-1.10165	0.149	0.625	4.00118e-21
clusters_0	Selplg	1.9882e-25	-0.738294	0.241	0.822	4.8347e-21
clusters_0	Abca13	2.64217e-25	-1.93961	0.044	0.438	6.42497e-21
clusters_0	Cd33	2.67706e-25	-0.689754	0.241	0.811	6.5098e-21
clusters_0	Anxa3	2.87971e-25	-0.918009	0.141	0.605	7.00259e-21
clusters_0	Svil	3.31744e-25	-0.901474	0.225	0.759	8.06703e-21
clusters_0	Ceacam10	4.16957e-25	-2.05606	0.048	0.438	1.01392e-20
clusters_0	Iqgap2	4.20471e-25	-0.591846	0.157	0.638	1.02246e-20
clusters_0	Mmp25	4.41509e-25	-0.857087	0.096	0.54	1.07362e-20
clusters_0	Pirb	1.04036e-24	-0.821977	0.325	0.893	2.52984e-20
clusters_0	Arf5	1.31553e-24	-0.477664	0.241	0.808	3.19897e-20
clusters_0	Serpinb1a	2.77787e-24	-2.76442	0.036	0.408	6.75494e-20
clusters_0	Crlf2	3.6989e-24	-0.768396	0.137	0.584	8.99461e-20
clusters_0	Itgam	8.29665e-24	-0.599379	0.386	0.953	2.0175e-19
clusters_0	Dhrs7	9.4608e-24	-0.59904	0.157	0.647	2.30058e-19
clusters_0	Syne1	2.95839e-23	-0.246676	0.217	0.726	7.19391e-19
clusters_0	Itgb2	6.81369e-23	-0.76346	0.229	0.751	1.65689e-18
clusters_0	Hsd11b1	7.42123e-23	-0.653415	0.149	0.597	1.80462e-18
clusters_0	AB124611	8.22635e-23	-0.897617	0.157	0.611	2.0004e-18
clusters_0	Sgms2	9.21098e-23	-0.544656	0.333	0.882	2.23983e-18
clusters_0	Mgst1	1.41933e-22	-0.506426	0.261	0.8	3.45139e-18
clusters_0	Ggt1	1.55383e-22	-2.09938	0.052	0.422	3.77845e-18
clusters_0	Unc119	1.6564e-22	-1.11697	0.12	0.542	4.02786e-18
clusters_0	Siglece	1.73862e-22	-1.17859	0.108	0.526	4.2278e-18
clusters_0	Gk	3.04784e-22	-1.06192	0.124	0.551	7.41144e-18
clusters_0	Slc6a6	3.69247e-22	-0.440612	0.229	0.74	8.97897e-18
clusters_0	Chd1	6.57095e-22	-0.812905	0.129	0.548	1.59786e-17
clusters_0	Ncf1	8.78043e-22	-0.735059	0.221	0.721	2.13514e-17
clusters_0	Tmod3	1.2971e-21	-0.376039	0.177	0.638	3.15415e-17
clusters_0	Fosl1	1.39581e-21	-1.10611	0.104	0.501	3.39419e-17
clusters_0	Il1f9	1.45592e-21	-0.772944	0.169	0.619	3.54036e-17
clusters_0	Aldh2	1.49303e-21	-0.650892	0.165	0.614	3.6306e-17
clusters_0	Cmtm6	1.6042e-21	-1.20374	0.12	0.526	3.90094e-17
clusters_0	Phlda1	1.6466e-21	-0.9385	0.145	0.575	4.00404e-17
clusters_0	Dhrs9	1.88083e-21	-0.919425	0.169	0.622	4.57361e-17
clusters_0	Cybb	1.99768e-21	-0.206321	0.173	0.638	4.85775e-17
clusters_0	Fmnl1	2.84089e-21	-0.556773	0.197	0.682	6.9082e-17
clusters_0	Rflnb	2.90513e-21	-4.15655	0.032	0.353	7.0644e-17
clusters_0	Mapk13	3.32906e-21	-0.465953	0.124	0.553	8.09529e-17
clusters_0	Rdh12	3.94776e-21	-0.714399	0.177	0.649	9.59976e-17
clusters_0	Prnp	4.0023e-21	-1.16511	0.088	0.466	9.73239e-17
clusters_0	Tbc1d8	4.4477e-21	-0.201738	0.197	0.699	1.08155e-16
clusters_0	Padi4	6.05643e-21	-0.686335	0.108	0.512	1.47274e-16
clusters_0	Plscr1	8.87333e-21	-0.792094	0.124	0.534	2.15773e-16
clusters_0	Scrg1	9.32833e-21	-0.343318	0.088	0.49	2.26837e-16
clusters_0	Arhgdib	1.0289e-20	-0.677121	0.406	0.915	2.50197e-16
clusters_0	Cdkn2d	1.0673e-20	-1.14395	0.129	0.54	2.59535e-16
clusters_0	Klhdc4	1.88467e-20	-0.516191	0.145	0.575	4.58295e-16
clusters_0	Pxk	1.91061e-20	-0.334558	0.169	0.622	4.64602e-16
clusters_0	Tarm1	1.96984e-20	-0.43782	0.213	0.704	4.79006e-16
clusters_0	Ucp2	2.02622e-20	-0.222433	0.237	0.751	4.92715e-16
clusters_0	Mcemp1	2.124e-20	-0.594972	0.382	0.91	5.16494e-16
clusters_0	Ripor2	2.62107e-20	-0.339167	0.229	0.721	6.37365e-16
clusters_0	Tkt	3.33996e-20	-0.465538	0.225	0.729	8.12178e-16
clusters_0	C3	4.19139e-20	-0.662398	0.141	0.556	1.01922e-15
clusters_0	Tspo	4.60583e-20	-0.475565	0.574	0.978	1.12e-15
clusters_0	Gadd45a	4.70282e-20	-0.754614	0.157	0.573	1.14358e-15
clusters_0	Cggbp1	5.25329e-20	-0.803357	0.116	0.504	1.27744e-15
clusters_0	Capns1	5.91317e-20	-0.609445	0.137	0.537	1.43791e-15
clusters_0	Flot2	6.76798e-20	-0.960053	0.088	0.46	1.64577e-15
clusters_0	Evi2a	7.22542e-20	-1.10429	0.072	0.433	1.75701e-15
clusters_0	Zyx	7.43674e-20	-0.549344	0.245	0.745	1.80839e-15
clusters_0	Prr13	9.13476e-20	-0.70735	0.369	0.888	2.2213e-15
clusters_0	Eif4g2	9.32208e-20	-0.590442	0.185	0.633	2.26685e-15
clusters_0	Gnai3	9.858e-20	-0.586101	0.233	0.712	2.39717e-15
clusters_0	Mettl9	1.25002e-19	-0.54839	0.129	0.526	3.03968e-15
clusters_0	Rassf5	1.31311e-19	-0.83076	0.076	0.433	3.19309e-15
clusters_0	S100a13	1.35558e-19	-0.753721	0.129	0.542	3.29636e-15
clusters_0	Snx18	1.35985e-19	-0.299426	0.285	0.833	3.30676e-15
clusters_0	Myl6	1.4137e-19	-0.652424	0.526	0.967	3.43769e-15
clusters_0	Cd38	1.52047e-19	-0.399309	0.108	0.49	3.69732e-15
clusters_0	Mrgpra2b	1.60594e-19	-1.12537	0.092	0.46	3.90518e-15
clusters_0	Orm1	1.76064e-19	-1.08456	0.1	0.463	4.28134e-15
clusters_0	Cd69	2.112e-19	-1.18324	0.137	0.537	5.13574e-15
clusters_0	Pdcd10	2.67283e-19	-0.304326	0.241	0.737	6.49952e-15
clusters_0	Triobp	2.87432e-19	-0.796203	0.092	0.449	6.98949e-15
clusters_0	App	3.30655e-19	-0.527401	0.446	0.951	8.04054e-15
clusters_0	Cap1	3.34386e-19	-0.281139	0.325	0.879	8.13125e-15
clusters_0	Treml2	3.42158e-19	-0.870028	0.088	0.46	8.32027e-15
clusters_0	Il1rap	3.51644e-19	-0.358147	0.293	0.795	8.55093e-15
clusters_0	Fgr	3.67275e-19	-0.448746	0.217	0.69	8.93104e-15
clusters_0	Hcls1	4.08609e-19	-0.400937	0.221	0.701	9.93615e-15
clusters_0	Rnasel	4.32746e-19	-0.711839	0.112	0.49	1.05231e-14
clusters_0	Itgb2l	4.87156e-19	-3.12156	0.028	0.323	1.18462e-14
clusters_0	Riok3	5.28528e-19	-0.308484	0.233	0.712	1.28522e-14
clusters_0	Bcl2l1	5.31789e-19	-0.275346	0.325	0.874	1.29315e-14
clusters_0	Klf7	5.705e-19	-0.288352	0.177	0.622	1.38728e-14
clusters_0	Adpgk	6.92543e-19	-2.97735	0.04	0.34	1.68406e-14
clusters_0	Plp2	9.39705e-19	-0.443344	0.137	0.529	2.28508e-14
clusters_0	Fis1	9.50731e-19	-0.264754	0.245	0.74	2.31189e-14
clusters_0	Ifitm1	9.67e-19	-0.726327	0.586	0.934	2.35145e-14
clusters_0	Acvrl1	1.08917e-18	-2.81437	0.032	0.329	2.64853e-14
clusters_0	Atp11b	1.09863e-18	-0.145734	0.309	0.841	2.67155e-14
clusters_0	Gch1	1.17045e-18	-0.473864	0.261	0.762	2.84618e-14
clusters_0	Ncf4	1.31883e-18	-0.478044	0.309	0.814	3.207e-14
clusters_0	Sugt1	1.61551e-18	-0.945112	0.1	0.458	3.92843e-14
clusters_0	Cyba	1.81735e-18	-0.573828	0.494	0.975	4.41926e-14
clusters_0	Camk2d	2.15367e-18	-0.471087	0.133	0.532	5.23708e-14
clusters_0	Cd164	2.25053e-18	-0.539786	0.193	0.625	5.47262e-14
clusters_0	Lpcat2	2.38034e-18	-0.434459	0.229	0.701	5.78827e-14
clusters_0	Fam241a	3.4164e-18	-0.680127	0.104	0.466	8.30767e-14
clusters_0	Sgk3	3.90862e-18	-0.568125	0.12	0.485	9.5046e-14
clusters_0	Arl6ip1	3.993e-18	-0.508283	0.237	0.715	9.70979e-14
clusters_0	Trem3	4.1612e-18	-0.382167	0.181	0.63	1.01188e-13
clusters_0	Fbxl5	4.76304e-18	-0.37046	0.43	0.937	1.15823e-13
clusters_0	Actn1	5.3413e-18	-0.935993	0.112	0.471	1.29884e-13
clusters_0	Atrnl1	5.87406e-18	-0.290699	0.177	0.586	1.42839e-13
clusters_0	Plaur	5.88667e-18	-0.692744	0.53	0.948	1.43146e-13
clusters_0	Rab4b	6.44488e-18	-0.374821	0.084	0.414	1.5672e-13
clusters_0	Dusp16	1.02438e-17	-0.191316	0.414	0.934	2.49099e-13
clusters_0	Cyb5r4	1.06591e-17	-0.473429	0.161	0.567	2.59198e-13
clusters_0	Nab1	1.15734e-17	-0.423099	0.185	0.611	2.81432e-13
clusters_0	Bin3	1.28949e-17	-1.10787	0.108	0.455	3.13566e-13
clusters_0	Lnpep	1.49485e-17	-0.43731	0.245	0.712	3.63503e-13
clusters_0	Pak2	1.76145e-17	-0.508707	0.253	0.737	4.28333e-13
clusters_0	Eif4ebp1	1.88143e-17	-0.256968	0.173	0.586	4.57508e-13
clusters_0	Crispld2	2.37548e-17	-1.85805	0.08	0.395	5.77645e-13
clusters_0	Osm	2.51229e-17	-0.281334	0.241	0.707	6.10913e-13
clusters_0	Arpc4	2.61892e-17	-0.316261	0.185	0.589	6.36843e-13
clusters_0	Klhl2	2.6528e-17	-0.30434	0.193	0.616	6.45081e-13
clusters_0	Tapbp	2.98434e-17	-0.380932	0.245	0.732	7.25702e-13
clusters_0	Actr3	3.30121e-17	-0.627773	0.486	0.956	8.02756e-13
clusters_0	Pag1	3.45539e-17	-0.111797	0.301	0.792	8.40247e-13
clusters_0	Trib1	3.80641e-17	-0.33916	0.245	0.718	9.25605e-13
clusters_0	Stk24	4.31668e-17	-0.412722	0.137	0.512	1.04969e-12
clusters_0	Ntng2	4.38602e-17	-0.726712	0.141	0.504	1.06655e-12
clusters_0	AA467197	4.70304e-17	-0.500588	0.365	0.852	1.14364e-12
clusters_0	Timp2	5.63693e-17	-0.291487	0.141	0.532	1.37073e-12
clusters_0	Mapre1	6.05001e-17	-0.751936	0.124	0.474	1.47118e-12
clusters_0	Arhgap30	6.24644e-17	-0.420117	0.185	0.589	1.51895e-12
clusters_0	Mvp	6.34192e-17	-0.503022	0.116	0.463	1.54217e-12
clusters_0	Ccpg1	7.12611e-17	-0.812061	0.133	0.479	1.73286e-12
clusters_0	Pilra	7.27813e-17	-0.485127	0.229	0.671	1.76982e-12
clusters_0	Rab24	8.09264e-17	-0.435859	0.096	0.43	1.96789e-12
clusters_0	Pten	8.44297e-17	-0.311552	0.261	0.729	2.05308e-12
clusters_0	Dok3	8.46739e-17	-0.944745	0.096	0.427	2.05901e-12
clusters_0	Zfp36l1	9.03877e-17	-0.478612	0.213	0.636	2.19796e-12
clusters_0	Ak2	9.07125e-17	-0.650076	0.092	0.427	2.20586e-12
clusters_0	Pet100	9.27869e-17	-0.883444	0.08	0.4	2.2563e-12
clusters_0	Atp11a	9.40781e-17	-0.429715	0.112	0.458	2.2877e-12
clusters_0	Pgd	1.00482e-16	-0.444681	0.149	0.521	2.44342e-12
clusters_0	Gnb2	1.03845e-16	-0.524967	0.349	0.896	2.52519e-12
clusters_0	Lamtor4	1.07087e-16	-0.785392	0.129	0.477	2.60405e-12
clusters_0	Stxbp5	1.12695e-16	-0.457094	0.104	0.447	2.74039e-12
clusters_0	Arpc5	1.1884e-16	-0.541435	0.434	0.918	2.88983e-12
clusters_0	Wdr1	1.20809e-16	-0.317606	0.116	0.477	2.93771e-12
clusters_0	Ppp1r18	1.61038e-16	-0.378724	0.153	0.518	3.91597e-12
clusters_0	Id1	1.65006e-16	-1.09767	0.124	0.479	4.01245e-12
clusters_0	Ebi3	1.96841e-16	-0.452821	0.104	0.452	4.78658e-12
clusters_0	Wdfy3	2.07473e-16	-0.213671	0.185	0.592	5.04512e-12
clusters_0	Cpne3	2.09677e-16	-1.51126	0.084	0.389	5.09871e-12
clusters_0	Tut7	2.18169e-16	-0.449938	0.39	0.868	5.30521e-12
clusters_0	Pomp	2.22093e-16	-0.158998	0.237	0.715	5.40063e-12
clusters_0	Gpsm3	2.98318e-16	-0.222393	0.273	0.756	7.25419e-12
clusters_0	Ndufa1	3.01305e-16	-0.520713	0.116	0.463	7.32683e-12
clusters_0	Hmgcr	3.04309e-16	-0.950988	0.088	0.408	7.39987e-12
clusters_0	Clint1	3.09247e-16	-0.295016	0.185	0.586	7.51997e-12
clusters_0	Col4a3bp	3.16325e-16	-0.233739	0.225	0.671	7.69208e-12
clusters_0	Sppl2a	3.91345e-16	-0.504724	0.369	0.86	9.51634e-12
clusters_0	Gpx1	4.28796e-16	-0.579538	0.329	0.786	1.0427e-11
clusters_0	Cript	4.43442e-16	-0.316279	0.173	0.57	1.07832e-11
clusters_0	Nedd9	5.32583e-16	0.162388	0.394	0.921	1.29508e-11
clusters_0	Stxbp2	6.67851e-16	-1.48428	0.056	0.342	1.62401e-11
clusters_0	Adgrg3	6.81733e-16	-1.00812	0.064	0.364	1.65777e-11
clusters_0	Bbip1	7.23715e-16	-0.175981	0.145	0.501	1.75986e-11
clusters_0	Lrp10	7.84613e-16	-0.429947	0.12	0.455	1.90794e-11
clusters_0	Stk40	8.00999e-16	-0.567992	0.129	0.474	1.94779e-11
clusters_0	Rab1a	8.19897e-16	-0.266373	0.181	0.578	1.99374e-11
clusters_0	Bst1	8.53947e-16	-0.314848	0.209	0.625	2.07654e-11
clusters_0	Tbrg1	8.95053e-16	-0.553243	0.177	0.556	2.1765e-11
clusters_0	Dgat1	9.00527e-16	-0.275923	0.237	0.682	2.18981e-11
clusters_0	A530064D06Rik	9.27602e-16	-0.692536	0.116	0.449	2.25565e-11
clusters_0	Taf7	9.68499e-16	-0.135021	0.185	0.581	2.3551e-11
clusters_0	Trafd1	1.07243e-15	-0.233727	0.269	0.74	2.60783e-11
clusters_0	Rsu1	1.11251e-15	-0.505421	0.096	0.411	2.70529e-11
clusters_0	Hmgn2	1.13223e-15	-0.451547	0.133	0.485	2.75325e-11
clusters_0	Pdcd6	1.15925e-15	-0.369032	0.209	0.616	2.81894e-11
clusters_0	Stk38	1.37904e-15	-0.303051	0.124	0.463	3.3534e-11
clusters_0	Pi16	1.45223e-15	-1.12046	0.072	0.37	3.5314e-11
clusters_0	Tmed5	1.54204e-15	-0.336425	0.293	0.762	3.74978e-11
clusters_0	Hpcal1	1.62556e-15	-0.393372	0.149	0.504	3.95287e-11
clusters_0	Rab6a	1.63455e-15	-0.289031	0.185	0.573	3.97473e-11
clusters_0	Adam8	1.64845e-15	-0.337757	0.273	0.751	4.00853e-11
clusters_0	Mboat7	1.82627e-15	-0.895525	0.076	0.375	4.44094e-11
clusters_0	Lyz2	1.94496e-15	-0.187298	0.197	0.573	4.72955e-11
clusters_0	Mbd2	2.09328e-15	-0.355938	0.329	0.822	5.09022e-11
clusters_0	Fam169b	2.30901e-15	-0.875158	0.084	0.397	5.61481e-11
clusters_0	Sp140	2.33749e-15	-0.370843	0.357	0.882	5.68406e-11
clusters_0	Rnf10	2.83491e-15	-0.62331	0.08	0.375	6.89365e-11
clusters_0	Ski	2.98474e-15	-0.738845	0.133	0.479	7.25799e-11
clusters_0	Ndufb9	3.04897e-15	-0.234665	0.185	0.589	7.41419e-11
clusters_0	Ncf2	3.06255e-15	-0.408178	0.394	0.882	7.4472e-11
clusters_0	Emilin2	3.09887e-15	-0.343974	0.309	0.773	7.53551e-11
clusters_0	Nadk	3.35607e-15	-0.208128	0.229	0.655	8.16095e-11
clusters_0	Diaph1	3.54965e-15	-0.326053	0.337	0.86	8.63169e-11
clusters_0	Ccnd3	3.96049e-15	0.144578	0.249	0.707	9.63073e-11
clusters_0	Prkar1a	4.09336e-15	0.122148	0.173	0.562	9.95382e-11
clusters_0	Fmnl3	4.96486e-15	-1.25421	0.064	0.342	1.20731e-10
clusters_0	Xdh	5.62221e-15	-0.438834	0.189	0.553	1.36715e-10
clusters_0	Aldh3b1	5.83677e-15	-1.94953	0.044	0.31	1.41933e-10
clusters_0	Sema4a	5.8887e-15	-1.00822	0.084	0.375	1.43196e-10
clusters_0	Noct	6.03571e-15	-0.21021	0.169	0.529	1.4677e-10
clusters_0	Gca	6.16928e-15	-0.26041	0.112	0.438	1.50018e-10
clusters_0	Fermt3	6.18246e-15	-0.853036	0.092	0.4	1.50339e-10
clusters_0	Cmah	6.34473e-15	-0.691359	0.056	0.332	1.54285e-10
clusters_0	F630028O10Rik	6.4418e-15	-0.331167	0.1	0.416	1.56645e-10
clusters_0	Asprv1	6.84132e-15	-0.887516	0.325	0.693	1.6636e-10
clusters_0	Nt5c2	7.27035e-15	-0.311502	0.153	0.512	1.76793e-10
clusters_0	Cast	7.8907e-15	-0.146002	0.309	0.789	1.91878e-10
clusters_0	Ubtd1	8.22604e-15	-0.322765	0.108	0.422	2.00033e-10
clusters_0	Dap	9.07236e-15	-0.32001	0.112	0.433	2.20612e-10
clusters_0	6430548M08Rik	9.18312e-15	-0.808188	0.084	0.378	2.23306e-10
clusters_0	Cd37	9.31889e-15	-0.205984	0.201	0.589	2.26607e-10
clusters_0	Vav3	1.01587e-14	-0.402043	0.237	0.647	2.4703e-10
clusters_0	Capza1	1.16232e-14	-0.359402	0.297	0.784	2.82641e-10
clusters_0	Rplp1	1.20131e-14	1.46144	0.743	0.901	2.92123e-10
clusters_0	Rpl13	1.20736e-14	1.45279	0.771	0.934	2.93595e-10
clusters_0	Map1lc3a	1.27783e-14	-0.593333	0.06	0.332	3.10729e-10
clusters_0	Itgal	1.29343e-14	-0.238151	0.129	0.458	3.14523e-10
clusters_0	Slc25a24	1.33409e-14	-1.48241	0.028	0.271	3.24412e-10
clusters_0	Ccdc12	1.33684e-14	-0.150685	0.197	0.581	3.2508e-10
clusters_0	Ppp1r12a	1.45149e-14	-0.43276	0.337	0.83	3.5296e-10
clusters_0	Cpd	1.52814e-14	-0.223256	0.181	0.54	3.71598e-10
clusters_0	Tecr	1.63295e-14	-0.679991	0.084	0.375	3.97084e-10
clusters_0	Vasp	1.67397e-14	-0.424267	0.422	0.94	4.0706e-10
clusters_0	Capza2	1.86308e-14	-0.407756	0.39	0.885	4.53046e-10
clusters_0	Degs1	1.91535e-14	-0.323846	0.116	0.43	4.65756e-10
clusters_0	Tln1	1.97912e-14	-0.400518	0.293	0.751	4.81262e-10
clusters_0	Abtb1	2.08507e-14	-0.904862	0.04	0.288	5.07027e-10
clusters_0	Cotl1	2.16331e-14	-0.302421	0.341	0.838	5.26053e-10
clusters_0	Hcfc1r1	2.39971e-14	-0.282017	0.1	0.4	5.83538e-10
clusters_0	Ap3b1	2.41109e-14	-0.439799	0.193	0.559	5.86304e-10
clusters_0	Selenok	2.46189e-14	-0.142023	0.317	0.808	5.98658e-10
clusters_0	1810037I17Rik	2.50004e-14	-0.194308	0.289	0.764	6.07936e-10
clusters_0	Asnsd1	2.94011e-14	-0.681103	0.076	0.359	7.14947e-10
clusters_0	Bnip2	3.10408e-14	-1.34197	0.08	0.351	7.5482e-10
clusters_0	Optn	3.13166e-14	-0.282107	0.153	0.482	7.61527e-10
clusters_0	St3gal4	3.13254e-14	-0.32909	0.145	0.477	7.61739e-10
clusters_0	Hacd4	3.13783e-14	-0.522904	0.092	0.389	7.63026e-10
clusters_0	Atp6v0a1	3.16947e-14	-0.232379	0.104	0.405	7.7072e-10
clusters_0	Rhov	3.79659e-14	-0.330097	0.104	0.408	9.23217e-10
clusters_0	Nfam1	3.85012e-14	-0.299352	0.133	0.463	9.36233e-10
clusters_0	Alas1	4.1569e-14	-0.467603	0.149	0.485	1.01083e-09
clusters_0	Def6	4.31551e-14	-0.767112	0.104	0.392	1.0494e-09
clusters_0	Nr3c1	4.35955e-14	-0.173429	0.249	0.658	1.06011e-09
clusters_0	Myh9	4.57889e-14	-0.344077	0.337	0.816	1.11345e-09
clusters_0	Stk17b	4.6209e-14	-0.394506	0.293	0.737	1.12366e-09
clusters_0	Rasa2	5.46476e-14	-0.338478	0.269	0.679	1.32887e-09
clusters_0	Pilrb2	7.65108e-14	-0.476843	0.092	0.386	1.86051e-09
clusters_0	Slc2a3	9.21798e-14	0.51943	0.153	0.485	2.24154e-09
clusters_0	Cyfip2	9.3151e-14	-0.66885	0.108	0.419	2.26515e-09
clusters_0	Cflar	9.4285e-14	-0.427779	0.245	0.641	2.29273e-09
clusters_0	Ppp2r5a	9.83913e-14	-0.310434	0.201	0.573	2.39258e-09
clusters_0	Ifnar2	1.03109e-13	-0.455268	0.217	0.608	2.50731e-09
clusters_0	G0s2	1.10245e-13	-0.403135	0.494	0.874	2.68082e-09
clusters_0	Samsn1	1.19387e-13	-0.536165	0.574	0.967	2.90314e-09
clusters_0	Ifngr1	1.27031e-13	-0.39833	0.149	0.499	3.08902e-09
clusters_0	Ndufb1-ps	1.28026e-13	0.101769	0.225	0.625	3.1132e-09
clusters_0	Acadl	1.53063e-13	-0.276005	0.161	0.501	3.72204e-09
clusters_0	Fgd4	1.53363e-13	-0.579256	0.088	0.37	3.72933e-09
clusters_0	1110008P14Rik	1.57608e-13	-0.568546	0.084	0.359	3.83256e-09
clusters_0	Nfkb1	1.71792e-13	-0.153344	0.293	0.737	4.17746e-09
clusters_0	Dbnl	1.76813e-13	-0.417501	0.189	0.545	4.29957e-09
clusters_0	Ywhaz	1.8876e-13	-0.10153	0.301	0.789	4.59008e-09
clusters_0	Add3	2.10371e-13	-0.587033	0.056	0.31	5.1156e-09
clusters_0	S100a6	2.16953e-13	-0.432807	0.888	0.986	5.27565e-09
clusters_0	Rap2c	2.3094e-13	-0.195137	0.169	0.521	5.61577e-09
clusters_0	Adgre5	2.53201e-13	-0.260239	0.281	0.699	6.15709e-09
clusters_0	Peli1	2.73739e-13	-0.404806	0.285	0.701	6.65651e-09
clusters_0	Gpi1	3.067e-13	-0.262048	0.394	0.893	7.45804e-09
clusters_0	Rnf13	3.06877e-13	-0.794306	0.08	0.348	7.46234e-09
clusters_0	Nfe2	3.08645e-13	-1.44721	0.048	0.293	7.50532e-09
clusters_0	Irf9	3.284e-13	-0.270624	0.153	0.485	7.9857e-09
clusters_0	Myd88	3.37869e-13	-0.331579	0.116	0.419	8.21596e-09
clusters_0	H2-T23	3.4932e-13	-0.15385	0.229	0.649	8.49441e-09
clusters_0	Atxn1	3.50109e-13	-0.322707	0.177	0.532	8.51359e-09
clusters_0	Rnf8	3.74458e-13	-0.232982	0.076	0.345	9.10569e-09
clusters_0	Arfgef1	3.78237e-13	-0.269441	0.153	0.474	9.19759e-09
clusters_0	Mcu	3.83873e-13	-1.21367	0.08	0.34	9.33464e-09
clusters_0	Rnasek	3.98807e-13	0.103345	0.185	0.545	9.6978e-09
clusters_0	Msmo1	4.0767e-13	-1.24489	0.064	0.315	9.91332e-09
clusters_0	Actg1	4.08953e-13	-0.448377	0.811	0.984	9.9445e-09
clusters_0	Cfp	4.13633e-13	-0.425385	0.12	0.425	1.00583e-08
clusters_0	Pycard	4.37594e-13	-0.149671	0.177	0.515	1.0641e-08
clusters_0	Pdlim5	4.94056e-13	0.181166	0.217	0.616	1.2014e-08
clusters_0	Sgms1	5.01756e-13	0.232419	0.177	0.537	1.22012e-08
clusters_0	Emp3	5.04661e-13	-0.347017	0.197	0.553	1.22718e-08
clusters_0	G6pdx	5.05947e-13	-1.05247	0.08	0.34	1.23031e-08
clusters_0	Xbp1	5.19164e-13	-0.347431	0.205	0.57	1.26245e-08
clusters_0	Apobr	5.35006e-13	-0.264687	0.1	0.395	1.30097e-08
clusters_0	A530032D15Rik	5.43376e-13	-0.899425	0.04	0.279	1.32133e-08
clusters_0	Gda	5.64101e-13	-0.178784	0.406	0.896	1.37172e-08
clusters_0	Cept1	5.72519e-13	-0.343177	0.116	0.408	1.3922e-08
clusters_0	Flii	5.76678e-13	-0.233844	0.124	0.419	1.40231e-08
clusters_0	Tgfbi	5.78283e-13	-0.209654	0.165	0.507	1.40621e-08
clusters_0	Tmcc1	6.15147e-13	-0.504398	0.177	0.512	1.49585e-08
clusters_0	Mapk3	6.60072e-13	-0.176662	0.088	0.362	1.6051e-08
clusters_0	Gm20559	6.68157e-13	-0.222998	0.169	0.499	1.62476e-08
clusters_0	Khdc4	7.36124e-13	-0.128153	0.145	0.468	1.79003e-08
clusters_0	Vdac2	7.83683e-13	-0.110615	0.149	0.474	1.90568e-08
clusters_0	Rinl	9.01509e-13	-0.950355	0.076	0.342	2.1922e-08
clusters_0	Ciao2a	9.95889e-13	-1.49568	0.068	0.318	2.4217e-08
clusters_0	Actr2	1.03275e-12	-0.217357	0.369	0.863	2.51135e-08
clusters_0	Uhrf1bp1l	1.0463e-12	-0.470772	0.092	0.37	2.54429e-08
clusters_0	Arhgef1	1.05885e-12	-0.696991	0.092	0.364	2.5748e-08
clusters_0	Cyth4	1.16634e-12	-0.227443	0.141	0.452	2.83619e-08
clusters_0	Ifitm2	1.24677e-12	-0.364957	0.771	0.997	3.03176e-08
clusters_0	Steap4	1.26483e-12	-0.486581	0.064	0.307	3.07569e-08
clusters_0	Usp15	1.47872e-12	-0.209275	0.145	0.449	3.5958e-08
clusters_0	Spi1	1.4848e-12	-0.115477	0.394	0.863	3.6106e-08
clusters_0	Cd47	1.49519e-12	-0.488024	0.49	0.918	3.63586e-08
clusters_0	Spcs1	1.50378e-12	-0.525641	0.096	0.364	3.65674e-08
clusters_0	Lgals8	1.51652e-12	-0.346652	0.169	0.499	3.68772e-08
clusters_0	Atp6v0d1	1.60984e-12	-0.211658	0.193	0.553	3.91465e-08
clusters_0	9530068E07Rik	1.63047e-12	-0.927729	0.072	0.315	3.96481e-08
clusters_0	Nxn	1.69414e-12	-1.64224	0.048	0.277	4.11965e-08
clusters_0	Pnpla8	1.72738e-12	-0.704358	0.088	0.351	4.20048e-08
clusters_0	Nckap1l	1.83183e-12	-0.480359	0.116	0.403	4.45446e-08
clusters_0	Vim	1.96591e-12	-0.271669	0.394	0.877	4.7805e-08
clusters_0	Gm19951	1.97227e-12	-0.598297	0.08	0.337	4.79596e-08
clusters_0	Tsc22d4	1.97611e-12	-0.240383	0.161	0.482	4.80531e-08
clusters_0	Katna1	2.01103e-12	-0.438549	0.116	0.397	4.89022e-08
clusters_0	Sys1	2.16357e-12	-0.385159	0.149	0.452	5.26116e-08
clusters_0	Max	2.25613e-12	0.212563	0.181	0.532	5.48624e-08
clusters_0	Cdc42se1	2.28259e-12	-0.182047	0.124	0.419	5.55057e-08
clusters_0	Skap2	2.32059e-12	0.228174	0.301	0.753	5.64298e-08
clusters_0	Actb	2.3354e-12	-0.362723	0.892	1	5.67898e-08
clusters_0	Rnf144a	2.33947e-12	-0.211878	0.149	0.463	5.6889e-08
clusters_0	Gnai2	2.39593e-12	-0.395367	0.466	0.929	5.82618e-08
clusters_0	Tes	2.47666e-12	-0.121951	0.349	0.822	6.0225e-08
clusters_0	Sh3bp5	2.61839e-12	-0.606078	0.108	0.384	6.36713e-08
clusters_0	Fdps	2.77754e-12	-0.466477	0.104	0.378	6.75416e-08
clusters_0	Trim30b	2.81592e-12	-0.135981	0.337	0.775	6.84747e-08
clusters_0	Tmem154	2.86793e-12	-0.541603	0.056	0.296	6.97394e-08
clusters_0	Nt5c3	2.91395e-12	0.210138	0.173	0.499	7.08586e-08
clusters_0	Ctsc	2.99332e-12	-0.923903	0.096	0.364	7.27885e-08
clusters_0	Cox6b1	3.04633e-12	0.155583	0.249	0.69	7.40776e-08
clusters_0	Slc27a4	3.37836e-12	-0.210278	0.08	0.34	8.21515e-08
clusters_0	Birc3	3.55411e-12	-0.243346	0.241	0.63	8.64252e-08
clusters_0	Zfand2b	3.7603e-12	-1.39151	0.036	0.255	9.14392e-08
clusters_0	Casp1	3.77675e-12	0.157154	0.129	0.436	9.18392e-08
clusters_0	Gm21188	4.0179e-12	-0.324493	0.141	0.449	9.77034e-08
clusters_0	Clasp1	4.10419e-12	-0.533692	0.08	0.329	9.98015e-08
clusters_0	Clec4a2	4.11334e-12	-0.560424	0.076	0.332	1.00024e-07
clusters_0	Sar1a	4.25894e-12	0.257056	0.124	0.408	1.03565e-07
clusters_0	Tbc1d23	4.40484e-12	-0.18439	0.112	0.395	1.07113e-07
clusters_0	Txndc17	4.49264e-12	-0.265962	0.124	0.427	1.09248e-07
clusters_0	Rab11a	4.52643e-12	0.166005	0.245	0.644	1.10069e-07
clusters_0	Pmvk	4.68728e-12	-0.917866	0.08	0.326	1.13981e-07
clusters_0	Cops9	5.13959e-12	-0.301566	0.088	0.337	1.24979e-07
clusters_0	Got2	5.39058e-12	-0.587233	0.064	0.301	1.31083e-07
clusters_0	Tor1aip1	5.444e-12	-0.133661	0.345	0.8	1.32382e-07
clusters_0	Hopx	6.6579e-12	-1.09991	0.048	0.266	1.619e-07
clusters_0	Herc4	6.74953e-12	-0.109411	0.189	0.521	1.64128e-07
clusters_0	Use1	7.13722e-12	-0.318463	0.133	0.416	1.73556e-07
clusters_0	Apobec3	8.20779e-12	-0.28475	0.189	0.518	1.99589e-07
clusters_0	Appbp2	8.3193e-12	-0.61099	0.056	0.285	2.023e-07
clusters_0	Iqgap1	8.35866e-12	-0.287303	0.486	0.959	2.03258e-07
clusters_0	Nras	8.5812e-12	-0.324542	0.08	0.332	2.08669e-07
clusters_0	Sipa1l1	9.86594e-12	-0.133311	0.193	0.529	2.3991e-07
clusters_0	Reep5	9.9338e-12	0.183939	0.189	0.542	2.4156e-07
clusters_0	Stat2	1.01658e-11	0.102881	0.261	0.658	2.47202e-07
clusters_0	Lmbrd1	1.01873e-11	0.240703	0.157	0.471	2.47724e-07
clusters_0	Supt4a	1.07622e-11	-0.151715	0.177	0.51	2.61704e-07
clusters_0	Gpat3	1.13708e-11	0.133195	0.169	0.485	2.76503e-07
clusters_0	Rnf19b	1.17723e-11	0.175952	0.257	0.649	2.86268e-07
clusters_0	Ndel1	1.18219e-11	0.159655	0.382	0.882	2.87474e-07
clusters_0	Ssr3	1.20653e-11	-0.671316	0.08	0.326	2.93392e-07
clusters_0	Klf2	1.26744e-11	-0.465579	0.373	0.781	3.08202e-07
clusters_0	Coro1a	1.33231e-11	-0.463422	0.538	0.959	3.23979e-07
clusters_0	Capn1	1.33376e-11	-0.974784	0.064	0.288	3.24331e-07
clusters_0	Nfil3	1.38733e-11	-0.437367	0.153	0.449	3.37357e-07
clusters_0	1600014C10Rik	1.46717e-11	0.202822	0.173	0.488	3.56771e-07
clusters_0	Bach1	1.51603e-11	-0.252374	0.124	0.405	3.68653e-07
clusters_0	Gm14548	1.53357e-11	-0.440262	0.04	0.252	3.72918e-07
clusters_0	Gpcpd1	1.54449e-11	0.335319	0.237	0.622	3.75575e-07
clusters_0	Ptpn1	1.58289e-11	-0.221823	0.361	0.833	3.84911e-07
clusters_0	Mctp2	1.66559e-11	0.102194	0.197	0.542	4.05022e-07
clusters_0	D8Ertd738e	1.70151e-11	0.390115	0.233	0.622	4.13755e-07
clusters_0	Adrb2	1.73334e-11	-1.03449	0.056	0.277	4.21496e-07
clusters_0	Slc22a15	1.74011e-11	-0.236872	0.084	0.332	4.23141e-07
clusters_0	Mafk	1.74578e-11	-0.89417	0.092	0.342	4.24521e-07
clusters_0	Atp6v1a	1.75132e-11	0.223444	0.213	0.567	4.25868e-07
clusters_0	Klf6	1.82236e-11	-0.25854	0.361	0.789	4.43143e-07
clusters_0	Rac1	1.91517e-11	-0.134035	0.39	0.858	4.65712e-07
clusters_0	Atp2c1	2.01558e-11	-0.554187	0.076	0.31	4.90128e-07
clusters_0	Rab31	2.03961e-11	0.124382	0.233	0.592	4.95971e-07
clusters_0	Chp1	2.04946e-11	0.276329	0.149	0.458	4.98367e-07
clusters_0	Cpeb2	2.09708e-11	0.266036	0.253	0.649	5.09946e-07
clusters_0	Tbc1d2	2.13475e-11	-0.211868	0.056	0.279	5.19107e-07
clusters_0	Asap1	2.27983e-11	-0.301431	0.149	0.449	5.54386e-07
clusters_0	Map2k4	2.30416e-11	0.225415	0.261	0.66	5.60303e-07
clusters_0	Calm1	2.48098e-11	-0.223883	0.414	0.888	6.03299e-07
clusters_0	Gm4070	2.48544e-11	-1.14612	0.048	0.26	6.04386e-07
clusters_0	Il4ra	2.54952e-11	-0.445923	0.104	0.362	6.19966e-07
clusters_0	Slc16a6	2.66197e-11	-0.529543	0.092	0.345	6.47312e-07
clusters_0	Il17ra	2.83691e-11	-0.307133	0.145	0.43	6.89851e-07
clusters_0	Arpc2	2.88199e-11	-0.350812	0.55	0.973	7.00814e-07
clusters_0	Cd53	3.08471e-11	-0.127165	0.414	0.918	7.50109e-07
clusters_0	Lcp2	3.16164e-11	0.112363	0.233	0.603	7.68815e-07
clusters_0	Atp6v1g1	3.24198e-11	-0.132674	0.406	0.901	7.88352e-07
clusters_0	Gmfg	3.26903e-11	-0.307106	0.458	0.934	7.94931e-07
clusters_0	Cox6c	3.28052e-11	-0.109363	0.245	0.641	7.97725e-07
clusters_0	Clic1	3.31235e-11	-0.384207	0.442	0.901	8.05464e-07
clusters_0	Sdhb	3.38956e-11	-0.184371	0.096	0.34	8.2424e-07
clusters_0	Serp1	3.4213e-11	0.311605	0.217	0.578	8.31958e-07
clusters_0	Ndufb7	3.4245e-11	0.144359	0.189	0.529	8.32735e-07
clusters_0	Trim25	3.52028e-11	-0.161172	0.285	0.696	8.56027e-07
clusters_0	Samd9l	3.86577e-11	-0.117996	0.373	0.811	9.40039e-07
clusters_0	Cmpk2	3.98429e-11	-0.225455	0.293	0.671	9.68859e-07
clusters_0	Ndufa3	4.05594e-11	0.151117	0.124	0.397	9.86283e-07
clusters_0	Fam13b	4.09332e-11	-0.227842	0.1	0.356	9.95373e-07
clusters_0	Man2a1	4.09995e-11	0.442101	0.173	0.485	9.96985e-07
clusters_0	Mbd5	4.21368e-11	-0.1699	0.133	0.411	1.02464e-06
clusters_0	Wdr26	4.63978e-11	-0.154174	0.237	0.592	1.12825e-06
clusters_0	Il10ra	4.97427e-11	-0.16926	0.133	0.414	1.20959e-06
clusters_0	Gm15283	4.97951e-11	-0.635394	0.068	0.29	1.21087e-06
clusters_0	Ostf1	5.23262e-11	-0.250775	0.526	0.956	1.27242e-06
clusters_0	Fcgr4	5.29745e-11	-0.1733	0.309	0.712	1.28818e-06
clusters_0	Tmem33	5.50648e-11	-0.76905	0.08	0.315	1.33901e-06
clusters_0	Dgat2	5.53537e-11	-0.106447	0.137	0.414	1.34604e-06
clusters_0	Parp4	5.63316e-11	-0.340429	0.108	0.353	1.36982e-06
clusters_0	Alox5	5.76938e-11	-0.70738	0.06	0.282	1.40294e-06
clusters_0	Cd300lf	5.90999e-11	-0.19724	0.494	0.978	1.43713e-06
clusters_0	Nod1	6.18318e-11	-0.754964	0.052	0.263	1.50356e-06
clusters_0	Upp1	6.23413e-11	-0.164464	0.442	0.888	1.51595e-06
clusters_0	Selenof	6.85816e-11	-0.261132	0.124	0.4	1.6677e-06
clusters_0	Pram1	6.9924e-11	-0.222329	0.084	0.323	1.70034e-06
clusters_0	Rab20	7.18794e-11	0.236629	0.261	0.663	1.74789e-06
clusters_0	Calm3	7.19343e-11	0.252985	0.165	0.458	1.74923e-06
clusters_0	Prkag1	7.33159e-11	-0.540503	0.112	0.362	1.78282e-06
clusters_0	Fes	7.52457e-11	-0.123215	0.108	0.364	1.82975e-06
clusters_0	Lamtor1	7.60437e-11	0.235831	0.157	0.458	1.84916e-06
clusters_0	Srp14	7.77907e-11	-0.197387	0.141	0.419	1.89164e-06
clusters_0	Rab11fip1	8.13446e-11	0.233477	0.257	0.625	1.97806e-06
clusters_0	Ap2s1	8.18034e-11	-0.131818	0.141	0.414	1.98921e-06
clusters_0	Arl2bp	8.63076e-11	-0.648541	0.056	0.266	2.09874e-06
clusters_0	Mxi1	8.89179e-11	-0.228608	0.173	0.463	2.16222e-06
clusters_0	Tap1	9.01073e-11	0.119557	0.221	0.584	2.19114e-06
clusters_0	Tank	9.41619e-11	-0.202545	0.237	0.597	2.28973e-06
clusters_0	Hmgb2	9.69587e-11	-0.256436	0.438	0.91	2.35775e-06
clusters_0	2025-03-05	9.78358e-11	-0.469208	0.153	0.444	2.37907e-06
clusters_0	E330009J07Rik	1.00256e-10	-0.258231	0.096	0.351	2.43793e-06
clusters_0	Cpne2	1.02721e-10	-0.195635	0.137	0.419	2.49787e-06
clusters_0	Syf2	1.05832e-10	-0.12235	0.169	0.468	2.57352e-06
clusters_0	Rpl23	1.11421e-10	1.06243	0.767	0.953	2.70941e-06
clusters_0	Zcrb1	1.3374e-10	0.397067	0.145	0.425	3.25216e-06
clusters_0	Rab2a	1.36803e-10	0.141192	0.321	0.77	3.32663e-06
clusters_0	Whamm	1.4081e-10	-0.276907	0.08	0.307	3.42409e-06
clusters_0	St3gal1	1.45393e-10	-0.548985	0.08	0.312	3.53553e-06
clusters_0	Acap2	1.55069e-10	0.297783	0.221	0.567	3.77081e-06
clusters_0	S100a11	1.60074e-10	-0.285653	0.715	0.978	3.89251e-06
clusters_0	Rer1	1.73187e-10	-0.254186	0.104	0.351	4.21139e-06
clusters_0	Ap3s1	1.75986e-10	0.189704	0.261	0.627	4.27945e-06
clusters_0	Rasgrp4	1.99331e-10	-0.520624	0.092	0.323	4.84714e-06
clusters_0	Rhoa	1.99485e-10	-0.259389	0.454	0.923	4.85088e-06
clusters_0	Atp1b3	2.12756e-10	-0.186894	0.161	0.447	5.1736e-06
clusters_0	Rac2	2.26995e-10	-0.253596	0.474	0.964	5.51983e-06
clusters_0	Fmr1	2.2797e-10	-0.136492	0.133	0.395	5.54355e-06
clusters_0	Gripap1	2.2989e-10	0.211148	0.165	0.463	5.59024e-06
clusters_0	Spata13	2.44686e-10	0.156581	0.141	0.414	5.95002e-06
clusters_0	Tpm3	2.50015e-10	-0.32648	0.418	0.86	6.07962e-06
clusters_0	Atp7a	2.51349e-10	-0.154516	0.133	0.4	6.11205e-06
clusters_0	Smap1	2.64118e-10	-0.126012	0.137	0.4	6.42256e-06
clusters_0	Vamp8	2.76643e-10	0.259241	0.257	0.633	6.72714e-06
clusters_0	Morf4l2	2.79345e-10	-0.31637	0.1	0.329	6.79282e-06
clusters_0	Eif2ak2	2.83022e-10	0.182924	0.277	0.668	6.88225e-06
clusters_0	Fgfr1op2	3.18534e-10	-0.193165	0.124	0.375	7.74579e-06
clusters_0	Smg1	3.22473e-10	0.370018	0.189	0.49	7.84157e-06
clusters_0	Cers2	3.274e-10	-0.465868	0.076	0.293	7.96137e-06
clusters_0	Tmem38b	3.32972e-10	-0.192161	0.12	0.375	8.09689e-06
clusters_0	Ifi35	3.35159e-10	-0.16509	0.253	0.595	8.15005e-06
clusters_0	Mtmr6	3.35369e-10	-0.119147	0.096	0.337	8.15516e-06
clusters_0	Trappc4	3.45512e-10	-0.299071	0.096	0.332	8.40181e-06
clusters_0	Map2k3	3.49107e-10	0.21517	0.157	0.441	8.48924e-06
clusters_0	Acer3	3.64701e-10	-0.486901	0.193	0.49	8.86843e-06
clusters_0	Tcf25	3.78565e-10	0.176308	0.197	0.518	9.20558e-06
clusters_0	Ifngr2	3.81182e-10	-0.241103	0.116	0.375	9.2692e-06
clusters_0	Mark2	3.85342e-10	-0.915204	0.104	0.334	9.37037e-06
clusters_0	Igfbp6	3.87184e-10	-0.507121	0.096	0.332	9.41514e-06
clusters_0	Cd52	3.95437e-10	-0.339175	0.715	0.995	9.61583e-06
clusters_0	Fcgr3	4.14979e-10	-0.23389	0.39	0.844	1.00911e-05
clusters_0	Daxx	4.19289e-10	-0.175542	0.161	0.455	1.01958e-05
clusters_0	Rap1a	4.29549e-10	0.315117	0.225	0.578	1.04454e-05
clusters_0	Prdx5	4.34447e-10	-0.139058	0.755	0.992	1.05644e-05
clusters_0	I830077J02Rik	4.57719e-10	-0.428248	0.104	0.348	1.11303e-05
clusters_0	Atp8a1	4.65999e-10	-0.285117	0.133	0.378	1.13317e-05
clusters_0	Dcp2	5.31109e-10	0.227825	0.116	0.37	1.2915e-05
clusters_0	Sem1	5.31544e-10	-0.185903	0.546	0.978	1.29255e-05
clusters_0	Jmjd1c	5.67664e-10	0.226607	0.297	0.696	1.38039e-05
clusters_0	Ubald2	5.78098e-10	0.296317	0.253	0.619	1.40576e-05
clusters_0	Snapc5	5.91379e-10	-0.569247	0.072	0.285	1.43806e-05
clusters_0	Snx10	6.37348e-10	0.343176	0.217	0.542	1.54984e-05
clusters_0	Elf1	6.40159e-10	0.183266	0.229	0.573	1.55668e-05
clusters_0	Mff	6.444e-10	-0.413143	0.092	0.31	1.56699e-05
clusters_0	Cmas	6.56571e-10	-0.435365	0.108	0.345	1.59658e-05
clusters_0	Tnfrsf1a	6.58314e-10	0.248976	0.241	0.595	1.60082e-05
clusters_0	Cltc	6.69715e-10	0.358417	0.209	0.54	1.62855e-05
clusters_0	Mindy1	6.7693e-10	-0.300288	0.068	0.271	1.64609e-05
clusters_0	Vamp3	6.93867e-10	-0.226673	0.08	0.296	1.68728e-05
clusters_0	Raet1e	7.08688e-10	-0.281108	0.068	0.274	1.72332e-05
clusters_0	Vti1b	7.12845e-10	-0.679842	0.076	0.29	1.73342e-05
clusters_0	Tnfaip6	7.36356e-10	-0.798332	0.12	0.359	1.7906e-05
clusters_0	Dync1i2	7.55089e-10	0.294937	0.153	0.433	1.83615e-05
clusters_0	Pdcl3	7.81678e-10	-0.481054	0.092	0.312	1.90081e-05
clusters_0	Atp8b4	8.12728e-10	0.324328	0.313	0.732	1.97631e-05
clusters_0	Rps23	8.75165e-10	1.35693	0.691	0.879	2.12814e-05
clusters_0	Samd4b	8.78256e-10	-0.974934	0.072	0.277	2.13566e-05
clusters_0	Slk	9.15216e-10	-0.177323	0.112	0.356	2.22553e-05
clusters_0	Kat6a	9.40835e-10	-0.104075	0.137	0.408	2.28783e-05
clusters_0	Rel	9.41494e-10	-0.224861	0.233	0.564	2.28943e-05
clusters_0	Vps29	9.55903e-10	0.472213	0.116	0.359	2.32447e-05
clusters_0	Por	9.63526e-10	0.431752	0.193	0.507	2.34301e-05
clusters_0	Slain2	9.7219e-10	-0.136005	0.088	0.307	2.36407e-05
clusters_0	Cntrl	1.00198e-09	0.140796	0.108	0.342	2.43651e-05
clusters_0	Dennd5a	1.02315e-09	-0.248056	0.133	0.381	2.488e-05
clusters_0	Arl5b	1.05872e-09	0.103095	0.169	0.447	2.57449e-05
clusters_0	Rpl27a	1.08621e-09	1.31075	0.703	0.904	2.64134e-05
clusters_0	Themis2	1.08894e-09	0.253661	0.301	0.693	2.64797e-05
clusters_0	Gabarapl2	1.09367e-09	0.224184	0.221	0.562	2.65947e-05
clusters_0	Entpd1	1.09868e-09	0.113269	0.422	0.852	2.67167e-05
clusters_0	Fcho2	1.11007e-09	0.243001	0.189	0.488	2.69937e-05
clusters_0	Arid4a	1.11505e-09	-0.169845	0.137	0.389	2.71146e-05
clusters_0	Cdc42ep2	1.11636e-09	-0.774393	0.072	0.277	2.71466e-05
clusters_0	Hmgcl	1.13389e-09	-0.824778	0.084	0.299	2.75727e-05
clusters_0	Tmem134	1.14576e-09	-0.250295	0.1	0.329	2.78614e-05
clusters_0	Chmp3	1.19829e-09	-0.181706	0.116	0.351	2.91387e-05
clusters_0	Plxnc1	1.20304e-09	-0.899496	0.056	0.255	2.92544e-05
clusters_0	Wwp2	1.20881e-09	0.225149	0.225	0.556	2.93947e-05
clusters_0	Tmem9b	1.22962e-09	-1.04538	0.06	0.252	2.99006e-05
clusters_0	Cebpz	1.31727e-09	0.162026	0.124	0.375	3.20322e-05
clusters_0	Snx6	1.33213e-09	-0.293863	0.108	0.334	3.23935e-05
clusters_0	Phf20l1	1.33617e-09	0.19299	0.169	0.452	3.24918e-05
clusters_0	Csta2	1.42813e-09	-1.22273	0.06	0.258	3.47279e-05
clusters_0	Parp10	1.42933e-09	0.301591	0.241	0.589	3.47571e-05
clusters_0	Trip12	1.44516e-09	0.207761	0.221	0.545	3.5142e-05
clusters_0	Glud1	1.47193e-09	-0.358954	0.1	0.318	3.57929e-05
clusters_0	Egr1	1.47797e-09	0.381242	0.305	0.682	3.59398e-05
clusters_0	Tuba1c	1.48237e-09	-0.242125	0.169	0.433	3.60468e-05
clusters_0	Pfn1	1.52529e-09	-0.348098	0.659	0.973	3.70904e-05
clusters_0	Furin	1.55698e-09	0.209404	0.181	0.458	3.78611e-05
clusters_0	Ralbp1	1.60866e-09	-0.791578	0.1	0.315	3.91177e-05
clusters_0	Tlr4	1.61317e-09	0.110115	0.185	0.49	3.92275e-05
clusters_0	Atp5f1	1.62125e-09	0.35588	0.249	0.633	3.9424e-05
clusters_0	Selenot	1.62675e-09	-0.248894	0.12	0.351	3.95578e-05
clusters_0	Pcyt1a	1.63798e-09	-0.704968	0.116	0.359	3.98309e-05
clusters_0	Serf2	1.73528e-09	-0.189012	0.462	0.904	4.21968e-05
clusters_0	4930523C07Rik	1.77968e-09	-0.355245	0.153	0.414	4.32764e-05
clusters_0	Nos2	1.85051e-09	-0.270273	0.253	0.567	4.49989e-05
clusters_0	Nr1h2	1.8615e-09	-0.35188	0.064	0.258	4.52661e-05
clusters_0	Zmat2	1.87653e-09	-0.313431	0.1	0.321	4.56315e-05
clusters_0	Tent5a	1.89029e-09	-0.19175	0.12	0.364	4.59663e-05
clusters_0	Sin3b	1.91696e-09	0.106203	0.213	0.537	4.66147e-05
clusters_0	Gsdmd	1.93923e-09	-0.316559	0.076	0.285	4.71562e-05
clusters_0	Sun2	1.94687e-09	0.139754	0.096	0.318	4.73419e-05
clusters_0	Ptprc	1.9907e-09	-0.245223	0.542	0.975	4.84079e-05
clusters_0	Zfhx3	2.02181e-09	-0.469894	0.072	0.274	4.91643e-05
clusters_0	Plekha2	2.02908e-09	-0.405629	0.1	0.326	4.93411e-05
clusters_0	Usp47	2.24106e-09	-0.192914	0.104	0.329	5.44958e-05
clusters_0	B430306N03Rik	2.39377e-09	0.16202	0.112	0.359	5.82093e-05
clusters_0	Washc4	2.42946e-09	0.210294	0.217	0.537	5.90771e-05
clusters_0	Fkbp8	2.46808e-09	-0.157546	0.092	0.304	6.00164e-05
clusters_0	Tox4	2.4822e-09	-0.243647	0.12	0.356	6.03596e-05
clusters_0	Higd2a	2.52652e-09	-0.107601	0.076	0.285	6.14375e-05
clusters_0	Pnp	2.55082e-09	0.238438	0.341	0.745	6.20282e-05
clusters_0	Nipsnap3b	2.58122e-09	-0.672993	0.072	0.266	6.27676e-05
clusters_0	Ehd4	2.59626e-09	-0.243374	0.149	0.405	6.31333e-05
clusters_0	Osbpl9	2.70564e-09	0.594319	0.313	0.737	6.57929e-05
clusters_0	Lsm14a	2.71813e-09	-0.271514	0.141	0.384	6.60969e-05
clusters_0	Cd84	2.76726e-09	-0.11185	0.153	0.405	6.72914e-05
clusters_0	Fuca1	2.77115e-09	-0.32879	0.104	0.323	6.7386e-05
clusters_0	Arhgap45	2.77491e-09	0.192216	0.133	0.386	6.74774e-05
clusters_0	Uqcr10	2.7785e-09	0.24385	0.149	0.411	6.75649e-05
clusters_0	Eif6	2.78802e-09	0.318573	0.185	0.488	6.77963e-05
clusters_0	Add1	2.87868e-09	-0.321445	0.104	0.323	7.00008e-05
clusters_0	Srsf11	2.88751e-09	0.301374	0.197	0.496	7.02156e-05
clusters_0	Wapl	2.88952e-09	-0.196338	0.145	0.397	7.02646e-05
clusters_0	Grb2	2.90032e-09	0.228867	0.281	0.66	7.0527e-05
clusters_0	Nin	2.99448e-09	-0.79849	0.072	0.268	7.28168e-05
clusters_0	Ctnna1	3.00923e-09	-0.631004	0.068	0.26	7.31755e-05
clusters_0	Rab21	3.08604e-09	0.478545	0.157	0.419	7.50433e-05
clusters_0	Iqsec1	3.11417e-09	0.226059	0.213	0.515	7.57272e-05
clusters_0	Ubl3	3.11873e-09	0.375784	0.185	0.474	7.58382e-05
clusters_0	Aplp2	3.23116e-09	-0.976319	0.08	0.279	7.85721e-05
clusters_0	Rpl19	3.3414e-09	1.158	0.727	0.896	8.12529e-05
clusters_0	Ccnl1	3.40327e-09	0.251106	0.378	0.836	8.27574e-05
clusters_0	Usp32	3.53158e-09	0.349815	0.229	0.545	8.58774e-05
clusters_0	Ccdc88b	3.53438e-09	0.312042	0.112	0.351	8.59454e-05
clusters_0	Jak1	3.53919e-09	0.505022	0.341	0.778	8.60625e-05
clusters_0	2025-09-07	3.58179e-09	0.522851	0.221	0.567	8.70983e-05
clusters_0	Pacsin2	3.63664e-09	-0.501133	0.088	0.299	8.84322e-05
clusters_0	Ppp1ca	3.63941e-09	0.264118	0.237	0.581	8.84995e-05
clusters_0	Diaph2	3.64823e-09	0.481244	0.281	0.636	8.87141e-05
clusters_0	Tet2	3.72295e-09	0.257868	0.257	0.611	9.05309e-05
clusters_0	Lims1	3.83059e-09	0.380551	0.269	0.63	9.31485e-05
clusters_0	Ppp1r3b	3.91597e-09	0.263244	0.237	0.564	9.52246e-05
clusters_0	Sorl1	3.98467e-09	0.415377	0.357	0.825	9.68953e-05
clusters_0	Cmtr1	3.99764e-09	0.307521	0.173	0.463	9.72107e-05
clusters_0	Naip2	4.01485e-09	-0.177589	0.116	0.334	9.76292e-05
clusters_0	Oas2	4.01761e-09	0.397538	0.169	0.458	9.76963e-05
clusters_0	Rhob	4.10034e-09	-0.430324	0.193	0.471	9.97079e-05
clusters_0	Pbx1	4.27088e-09	0.15495	0.245	0.559	0.000103855
clusters_0	Cox7a2l	4.75016e-09	0.280531	0.177	0.477	0.00011551
clusters_0	Sub1	5.03471e-09	0.102423	0.341	0.789	0.000122429
clusters_0	Hmox2	5.25591e-09	0.277184	0.217	0.518	0.000127808
clusters_0	Dnajc5	5.30224e-09	0.107366	0.169	0.438	0.000128935
clusters_0	Sla	5.3462e-09	-0.430825	0.1	0.315	0.000130004
clusters_0	Smap2	5.34928e-09	0.343443	0.181	0.474	0.000130078
clusters_0	Sidt2	5.41837e-09	-0.154094	0.08	0.29	0.000131759
clusters_0	Wdr37	5.42678e-09	-0.475802	0.072	0.268	0.000131963
clusters_0	Becn1	5.61481e-09	-0.311641	0.092	0.299	0.000136535
clusters_0	Gm44148	5.77527e-09	-0.151216	0.092	0.304	0.000140437
clusters_0	Lrrfip1	5.80396e-09	0.260555	0.349	0.781	0.000141135
clusters_0	Atp5k	5.89854e-09	-0.221621	0.104	0.31	0.000143435
clusters_0	Igsf6	6.01586e-09	0.260137	0.201	0.501	0.000146288
clusters_0	Agfg1	6.02769e-09	-0.661757	0.072	0.266	0.000146575
clusters_0	Anks1	6.24174e-09	0.189999	0.141	0.386	0.00015178
clusters_0	Abhd2	6.25728e-09	-0.379048	0.076	0.271	0.000152158
clusters_0	Atp6v0b	6.27325e-09	0.284132	0.297	0.671	0.000152547
clusters_0	Eif3h	6.88901e-09	0.187336	0.153	0.425	0.00016752
clusters_0	Pde4b	7.07002e-09	0.564378	0.349	0.775	0.000171922
clusters_0	Map2k2	7.09269e-09	-0.449015	0.084	0.279	0.000172473
clusters_0	Mob1a	7.13646e-09	-0.275381	0.104	0.318	0.000173537
clusters_0	Eif3k	7.15179e-09	0.334311	0.177	0.46	0.00017391
clusters_0	Smndc1	7.29867e-09	-0.164373	0.157	0.414	0.000177482
clusters_0	Ppp4r1	7.50996e-09	-0.252443	0.08	0.282	0.00018262
clusters_0	Ccnl2	7.62193e-09	0.608015	0.185	0.471	0.000185343
clusters_0	Numb	7.6322e-09	0.276061	0.177	0.455	0.000185592
clusters_0	Gng2	7.63301e-09	0.190776	0.169	0.436	0.000185612
clusters_0	Stag2	7.66392e-09	0.252995	0.149	0.403	0.000186363
clusters_0	Socs1	7.69455e-09	-0.163105	0.181	0.452	0.000187108
clusters_0	Rtn3	8.3029e-09	0.280356	0.177	0.46	0.000201902
clusters_0	Rsbn1l	8.37503e-09	-0.143352	0.133	0.362	0.000203656
clusters_0	Hif1a	8.63836e-09	0.174182	0.349	0.77	0.000210059
clusters_0	Grina	8.86198e-09	-0.282462	0.542	0.967	0.000215497
clusters_0	Dapp1	8.92898e-09	-0.392039	0.137	0.375	0.000217126
clusters_0	Lcp1	8.98489e-09	-0.32245	0.594	0.975	0.000218486
clusters_0	Stom	9.49424e-09	-0.48585	0.092	0.296	0.000230871
clusters_0	Ypel5	9.70345e-09	0.48716	0.133	0.375	0.000235959
clusters_0	Antxr2	9.81192e-09	0.414258	0.438	0.871	0.000238596
clusters_0	Arhgap9	1.00301e-08	-0.238737	0.116	0.34	0.000243903
clusters_0	Vti1a	1.02276e-08	0.622244	0.169	0.43	0.000248705
clusters_0	Tsc22d3	1.02497e-08	0.354351	0.213	0.521	0.000249242
clusters_0	Esyt2	1.03177e-08	0.246678	0.153	0.414	0.000250896
clusters_0	Ssr4	1.10096e-08	0.116848	0.116	0.359	0.00026772
clusters_0	Pla2g7	1.10472e-08	-0.228475	0.45	0.811	0.000268634
clusters_0	Surf4	1.13619e-08	-0.751776	0.076	0.266	0.000276287
clusters_0	Rnf24	1.14665e-08	-0.182952	0.068	0.26	0.000278832
clusters_0	Ndufa11	1.19883e-08	-0.454533	0.084	0.279	0.000291519
clusters_0	Rnf169	1.21947e-08	-0.308325	0.112	0.326	0.000296538
clusters_0	Psmb4	1.22403e-08	0.427387	0.209	0.504	0.000297648
clusters_0	Laptm5	1.22581e-08	0.242746	0.297	0.704	0.000298081
clusters_0	Uqcrb	1.24013e-08	0.428498	0.133	0.375	0.000301563
clusters_0	Arrb2	1.29877e-08	0.149349	0.173	0.427	0.000315822
clusters_0	Mdm2	1.32441e-08	0.643159	0.197	0.474	0.000322058
clusters_0	Lpp	1.35808e-08	0.453691	0.241	0.567	0.000330245
clusters_0	Anp32a	1.36269e-08	0.427283	0.197	0.499	0.000331366
clusters_0	Cklf	1.4573e-08	-0.361481	0.076	0.268	0.000354372
clusters_0	Tm9sf3	1.47214e-08	0.256887	0.157	0.411	0.000357981
clusters_0	Npepps	1.51706e-08	0.339177	0.281	0.63	0.000368904
clusters_0	Atp6ap2	1.55357e-08	0.151678	0.169	0.427	0.000377782
clusters_0	Psmb3	1.5686e-08	0.171838	0.161	0.43	0.000381435
clusters_0	Prkcd	1.61408e-08	-0.163737	0.12	0.345	0.000392496
clusters_0	Zeb1	1.66993e-08	0.363248	0.205	0.501	0.000406077
clusters_0	Fabp5	1.67602e-08	0.312636	0.217	0.507	0.000407557
clusters_0	Chmp5	1.69085e-08	0.176424	0.173	0.444	0.000411163
clusters_0	Son	1.70585e-08	0.240581	0.301	0.696	0.000414811
clusters_0	Tbc1d1	1.77339e-08	0.509218	0.201	0.474	0.000431235
clusters_0	Cyld	1.7796e-08	0.240299	0.157	0.408	0.000432744
clusters_0	Rtn4	1.79038e-08	0.306794	0.309	0.701	0.000435366
clusters_0	Crebbp	1.86005e-08	0.185565	0.157	0.411	0.000452307
clusters_0	Dleu2	1.91661e-08	0.414506	0.229	0.512	0.000466062
clusters_0	Ssu72	1.94088e-08	0.264468	0.225	0.523	0.000471964
clusters_0	Dgkg	1.95646e-08	0.147282	0.072	0.271	0.000475753
clusters_0	Limd2	1.99568e-08	0.197607	0.161	0.414	0.00048529
clusters_0	Slc20a1	1.99905e-08	-0.731906	0.088	0.279	0.00048611
clusters_0	Cnih4	2.10051e-08	0.29684	0.137	0.381	0.00051078
clusters_0	Snf8	2.10607e-08	-0.420253	0.096	0.293	0.000512133
clusters_0	Atp5j	2.11514e-08	0.348343	0.217	0.54	0.000514338
clusters_0	Gng12	2.11973e-08	0.241231	0.269	0.614	0.000515454
clusters_0	Ctsl	2.21271e-08	0.272504	0.261	0.597	0.000538065
clusters_0	Zdhhc18	2.25408e-08	0.287241	0.177	0.444	0.000548126
clusters_0	Bcl2l11	2.27092e-08	0.307604	0.317	0.663	0.00055222
clusters_0	Ube2d2a	2.34445e-08	0.506751	0.193	0.482	0.000570099
clusters_0	Sec61b	2.34829e-08	0.185809	0.209	0.521	0.000571033
clusters_0	Ubr4	2.35807e-08	0.769682	0.12	0.334	0.000573413
clusters_0	2025-03-06	2.47076e-08	-0.212389	0.08	0.274	0.000600816
clusters_0	Cox7c	2.49641e-08	0.251765	0.309	0.723	0.000607053
clusters_0	Fau	2.53918e-08	0.63511	0.851	0.997	0.000617452
clusters_0	Chm	2.55112e-08	0.380323	0.092	0.296	0.000620356
clusters_0	Dctn3	2.62693e-08	0.270045	0.165	0.425	0.000638791
clusters_0	Ogfrl1	2.65637e-08	0.301538	0.293	0.663	0.000645949
clusters_0	Tprgl	2.6752e-08	0.191796	0.141	0.378	0.000650528
clusters_0	Serinc3	2.76577e-08	0.255392	0.345	0.762	0.000672552
clusters_0	Rbx1	2.80216e-08	0.365254	0.209	0.51	0.000681401
clusters_0	Kif13b	2.89889e-08	-0.863434	0.088	0.277	0.000704924
clusters_0	Psenen	3.01097e-08	0.506775	0.237	0.559	0.000732178
clusters_0	Grk2	3.05664e-08	0.355076	0.145	0.384	0.000743284
clusters_0	Nub1	3.05674e-08	-0.14611	0.153	0.389	0.000743307
clusters_0	Nono	3.0637e-08	-0.64247	0.108	0.31	0.000745
clusters_0	Hacd2	3.10338e-08	-0.307834	0.076	0.263	0.000754648
clusters_0	Itm2b	3.2528e-08	-0.206301	0.494	0.945	0.000790982
clusters_0	Ubxn4	3.27999e-08	0.261862	0.213	0.512	0.000797596
clusters_0	Spop	3.30753e-08	0.11219	0.213	0.504	0.000804291
clusters_0	Slc38a2	3.42047e-08	-0.117227	0.149	0.384	0.000831755
clusters_0	Fam129a	3.49262e-08	0.207336	0.181	0.452	0.0008493
clusters_0	Il18bp	3.58351e-08	-0.844774	0.084	0.268	0.000871402
clusters_0	Sumo1	3.79979e-08	0.32274	0.225	0.537	0.000923996
clusters_0	Serinc1	3.86738e-08	-0.101097	0.133	0.351	0.000940432
clusters_0	Sirt2	3.8984e-08	-0.106553	0.129	0.342	0.000947973
clusters_0	Plbd1	3.94112e-08	0.324605	0.225	0.521	0.000958362
clusters_0	Pgk1	4.06459e-08	0.405534	0.297	0.69	0.000988386
clusters_0	Fas	4.16611e-08	0.127269	0.149	0.384	0.00101307
clusters_0	Rnh1	4.2132e-08	0.382516	0.209	0.512	0.00102452
clusters_0	Morrbid	4.24783e-08	0.267218	0.293	0.649	0.00103294
clusters_0	Kras	4.45244e-08	0.437284	0.257	0.589	0.0010827
clusters_0	Wdfy4	4.47213e-08	-0.381012	0.092	0.293	0.00108749
clusters_0	Rps8	4.60312e-08	1.47957	0.675	0.86	0.00111934
clusters_0	Ip6k1	4.61517e-08	0.260293	0.137	0.367	0.00112227
clusters_0	Cd63	4.63183e-08	0.455826	0.249	0.581	0.00112632
clusters_0	Kdm2a	4.69682e-08	0.249793	0.165	0.411	0.00114213
clusters_0	Gnb1	4.75086e-08	0.29273	0.261	0.611	0.00115527
clusters_0	Psmb9	4.78203e-08	0.359682	0.269	0.595	0.00116285
clusters_0	Ywhag	4.79852e-08	0.210986	0.104	0.312	0.00116686
clusters_0	Taok1	4.87067e-08	-0.135987	0.149	0.375	0.0011844
clusters_0	Stx7	4.93356e-08	-0.188354	0.129	0.342	0.00119969
clusters_0	Rala	4.96917e-08	-0.46315	0.116	0.323	0.00120835
clusters_0	Zc3h7a	4.96918e-08	0.313211	0.225	0.521	0.00120836
clusters_0	Arpp19	5.04509e-08	0.325485	0.165	0.411	0.00122681
clusters_0	Sfr1	5.13609e-08	-0.426639	0.096	0.293	0.00124894
clusters_0	Nabp1	5.20779e-08	0.125891	0.161	0.414	0.00126638
clusters_0	Plac8	5.23138e-08	-0.115563	0.55	0.948	0.00127211
clusters_0	Stxbp3	5.23614e-08	0.108981	0.108	0.318	0.00127327
clusters_0	Ubxn1	5.4714e-08	0.471636	0.169	0.425	0.00133048
clusters_0	Rapgef6	5.50725e-08	0.606102	0.201	0.485	0.0013392
clusters_0	Ppt1	5.59029e-08	0.362657	0.157	0.397	0.00135939
clusters_0	Pigx	5.62379e-08	-0.672982	0.084	0.266	0.00136754
clusters_0	Mapkapk2	5.94439e-08	0.14028	0.394	0.822	0.0014455
clusters_0	Bcap31	5.99322e-08	-0.288025	0.08	0.263	0.00145737
clusters_0	Hdac4	6.04052e-08	-0.135917	0.096	0.29	0.00146887
clusters_0	Ywhae	6.07949e-08	0.347928	0.225	0.542	0.00147835
clusters_0	Nktr	6.12358e-08	0.158063	0.273	0.586	0.00148907
clusters_0	Mpc1	6.19138e-08	0.264896	0.177	0.436	0.00150556
clusters_0	Clec5a	6.26215e-08	0.303973	0.129	0.353	0.00152277
clusters_0	Oasl1	6.35366e-08	-0.134774	0.43	0.803	0.00154502
clusters_0	Pfkfb3	6.35936e-08	0.388777	0.209	0.499	0.00154641
clusters_0	Tmem258	6.40701e-08	-0.138394	0.092	0.279	0.00155799
clusters_0	Ypel3	6.48945e-08	0.416067	0.217	0.504	0.00157804
clusters_0	Tbk1	6.68164e-08	0.244537	0.189	0.455	0.00162478
clusters_0	Zc3hav1	6.69461e-08	0.131808	0.394	0.803	0.00162793
clusters_0	Cib1	6.74399e-08	0.122999	0.092	0.285	0.00163994
clusters_0	Sec24b	6.78e-08	0.353272	0.161	0.414	0.00164869
clusters_0	Nck1	6.83981e-08	-0.398468	0.084	0.266	0.00166324
clusters_0	Eif3f	6.88508e-08	0.453051	0.209	0.512	0.00167424
clusters_0	Ywhah	6.91926e-08	0.420601	0.169	0.419	0.00168256
clusters_0	Bag1	6.92013e-08	0.118948	0.145	0.364	0.00168277
clusters_0	Card19	7.01569e-08	0.362301	0.281	0.614	0.00170601
clusters_0	Fyb	7.12643e-08	0.267017	0.386	0.805	0.00173293
clusters_0	Azin1	7.27817e-08	0.4442	0.173	0.427	0.00176983
clusters_0	Atrx	7.3591e-08	0.162835	0.145	0.375	0.00178951
clusters_0	Hdlbp	7.42572e-08	0.33018	0.124	0.345	0.00180571
clusters_0	Hexb	7.46895e-08	0.508813	0.1	0.301	0.00181623
clusters_0	Srrm2	7.50283e-08	0.40417	0.277	0.649	0.00182446
clusters_0	Slu7	8.00445e-08	-0.834427	0.084	0.266	0.00194644
clusters_0	Ddx3x	8.07907e-08	0.516053	0.249	0.559	0.00196459
clusters_0	Zc3h15	8.08441e-08	-0.37683	0.116	0.326	0.00196588
clusters_0	Traf1	8.40328e-08	-0.401426	0.165	0.397	0.00204342
clusters_0	Ccni	8.58719e-08	0.13504	0.137	0.364	0.00208815
clusters_0	Xpo6	8.78533e-08	-0.118199	0.104	0.307	0.00213633
clusters_0	Ube2a	9.09153e-08	0.281085	0.157	0.395	0.00221079
clusters_0	Pkn2	9.24601e-08	-0.10407	0.092	0.288	0.00224835
clusters_0	Ugp2	9.30781e-08	0.326632	0.124	0.334	0.00226338
clusters_0	Ndufa2	9.59137e-08	0.213143	0.189	0.449	0.00233233
clusters_0	Ost4	9.98068e-08	0.478938	0.177	0.438	0.002427
clusters_0	Trim26	1.04755e-07	0.768827	0.189	0.444	0.00254732
clusters_0	Ddx3y	1.05179e-07	0.290477	0.173	0.425	0.00255763
clusters_0	Cox14	1.08871e-07	-0.220282	0.096	0.285	0.00264743
clusters_0	Cr1l	1.09515e-07	0.158549	0.108	0.299	0.00266308
clusters_0	Mindy3	1.10447e-07	-0.610783	0.08	0.258	0.00268573
clusters_0	Gde1	1.11072e-07	0.434153	0.169	0.416	0.00270094
clusters_0	Atp5l	1.14219e-07	0.335934	0.369	0.847	0.00277745
clusters_0	Ifit2	1.15459e-07	-0.351245	0.341	0.616	0.00280762
clusters_0	Il6ra	1.17601e-07	-0.298737	0.1	0.296	0.00285971
clusters_0	Grn	1.18573e-07	0.24232	0.229	0.526	0.00288335
clusters_0	Slc7a11	1.20604e-07	0.415907	0.369	0.748	0.00293272
clusters_0	1810013L24Rik	1.22151e-07	0.495795	0.088	0.277	0.00297034
clusters_0	Baz2b	1.22789e-07	0.34899	0.446	0.904	0.00298586
clusters_0	Trim56	1.26286e-07	0.435215	0.12	0.34	0.0030709
clusters_0	Ptafr	1.26854e-07	0.33396	0.245	0.542	0.00308471
clusters_0	Atxn7l3b	1.26898e-07	0.221804	0.1	0.299	0.00308578
clusters_0	Cyfip1	1.27438e-07	0.108683	0.185	0.43	0.00309891
clusters_0	Fosl2	1.29428e-07	0.430865	0.277	0.627	0.0031473
clusters_0	Pdlim2	1.3187e-07	0.427653	0.153	0.381	0.00320668
clusters_0	Tnfaip8	1.33275e-07	0.2359	0.124	0.332	0.00324084
clusters_0	Sf3b2	1.33396e-07	0.226997	0.185	0.452	0.00324378
clusters_0	Ltb	1.33853e-07	-0.101385	0.104	0.307	0.0032549
clusters_0	Fam172a	1.34512e-07	-0.232504	0.129	0.334	0.00327092
clusters_0	Mapk6	1.37647e-07	-0.550504	0.153	0.375	0.00334717
clusters_0	Asah1	1.38293e-07	0.434871	0.092	0.277	0.00336287
clusters_0	Myo1f	1.38864e-07	0.547097	0.233	0.526	0.00337675
clusters_0	Abi1	1.39159e-07	0.586342	0.229	0.515	0.00338394
clusters_0	Uqcrq	1.39494e-07	0.576835	0.273	0.627	0.00339207
clusters_0	BC031181	1.42765e-07	0.41491	0.173	0.419	0.00347161
clusters_0	Slfn8	1.46575e-07	0.283237	0.281	0.605	0.00356427
clusters_0	Psme1	1.47739e-07	0.232852	0.309	0.677	0.00359256
clusters_0	Tmed10	1.48264e-07	0.428334	0.237	0.548	0.00360534
clusters_0	Psd4	1.52171e-07	0.112714	0.076	0.255	0.00370035
clusters_0	Gm12185	1.52333e-07	-0.161736	0.092	0.282	0.00370427
clusters_0	Milr1	1.62722e-07	0.189493	0.112	0.321	0.00395692
clusters_0	Cmtm7	1.63823e-07	0.129213	0.112	0.321	0.00398368
clusters_0	Plk3	1.66776e-07	0.38637	0.181	0.438	0.00405549
clusters_0	Filip1l	1.67275e-07	0.416448	0.185	0.436	0.00406762
clusters_0	Sgk1	1.77762e-07	0.416419	0.108	0.31	0.00432264
clusters_0	Pxn	1.7839e-07	0.477422	0.217	0.512	0.0043379
clusters_0	Cytip	1.79132e-07	0.148295	0.257	0.575	0.00435595
clusters_0	Kctd12	1.79156e-07	0.16671	0.177	0.425	0.00435654
clusters_0	Pde4d	1.79789e-07	-0.401994	0.116	0.31	0.00437194
clusters_0	Rnf114	1.80691e-07	0.324405	0.229	0.515	0.00439387
clusters_0	Acod1	1.8756e-07	-0.109714	0.598	0.956	0.00456089
clusters_0	Abracl	1.90401e-07	0.242109	0.189	0.447	0.00462998
clusters_0	Tmem71	1.94159e-07	0.233954	0.08	0.252	0.00472136
clusters_0	Cop1	1.96225e-07	0.113852	0.096	0.29	0.00477161
clusters_0	Ddx58	1.98473e-07	0.200363	0.382	0.764	0.00482627
clusters_0	Tmem184b	2.05342e-07	0.309772	0.161	0.4	0.00499331
clusters_0	Mrps18c	2.05688e-07	0.421599	0.116	0.312	0.00500172
clusters_0	Adipor2	2.0686e-07	0.607901	0.157	0.386	0.00503022
clusters_0	Stk4	2.10717e-07	-0.164354	0.116	0.31	0.005124
clusters_0	Arid5b	2.13141e-07	0.444186	0.313	0.671	0.00518294
clusters_0	Srrm1	2.24606e-07	0.143897	0.153	0.381	0.00546175
clusters_0	Ifit1	2.24611e-07	-0.392006	0.566	0.852	0.00546187
clusters_0	Klf13	2.25702e-07	0.33038	0.237	0.521	0.0054884
clusters_0	Kdm5b	2.27786e-07	0.302013	0.092	0.268	0.00553907
clusters_0	Atp6v0e	2.30707e-07	0.101929	0.345	0.732	0.00561011
clusters_0	Mfsd14b	2.32021e-07	-0.676253	0.084	0.255	0.00564206
clusters_0	Sat1	2.33342e-07	-0.168352	0.526	0.926	0.00567417
clusters_0	Fam49b	2.39636e-07	0.33142	0.349	0.775	0.00582723
clusters_0	Nek6	2.41185e-07	-0.311369	0.108	0.301	0.00586489
clusters_0	Gm34084	2.48571e-07	0.114902	0.096	0.279	0.0060445
clusters_0	Sde2	2.50359e-07	0.390603	0.169	0.408	0.00608798
clusters_0	Arid4b	2.51419e-07	0.523559	0.277	0.605	0.00611375
clusters_0	Ranbp2	2.56708e-07	0.36605	0.273	0.597	0.00624238
clusters_0	Nptn	2.60101e-07	0.222719	0.153	0.375	0.00632487
clusters_0	Nrd1	2.64237e-07	0.528075	0.173	0.422	0.00642544
clusters_0	Nsa2	2.69974e-07	-0.403281	0.124	0.334	0.00656497
clusters_0	Irgm1	2.70906e-07	0.210259	0.241	0.529	0.00658762
clusters_0	Gmeb2	2.76151e-07	0.321241	0.092	0.271	0.00671517
clusters_0	Tmem14c	2.76663e-07	0.24131	0.137	0.353	0.0067276
clusters_0	C130026I21Rik	2.80826e-07	0.219538	0.1	0.293	0.00682886
clusters_0	Dcaf12	2.80942e-07	0.156194	0.092	0.274	0.00683168
clusters_0	Srpr	2.83439e-07	0.223877	0.104	0.288	0.00689238
clusters_0	Ptpre	2.84127e-07	0.187571	0.193	0.444	0.00690911
clusters_0	Ap2b1	2.87563e-07	0.322648	0.157	0.386	0.00699267
clusters_0	Slc25a20	2.91181e-07	0.207784	0.104	0.296	0.00708064
clusters_0	Hipk1	2.92532e-07	-0.200012	0.088	0.268	0.0071135
clusters_0	Cpeb4	3.10315e-07	0.737305	0.185	0.436	0.00754592
clusters_0	Sf1	3.21048e-07	-0.368525	0.088	0.266	0.00780693
clusters_0	Ppp1r15b	3.24196e-07	0.157355	0.161	0.389	0.00788348
clusters_0	Xiap	3.24593e-07	0.494976	0.169	0.408	0.00789314
clusters_0	Vps28	3.25639e-07	0.448307	0.161	0.392	0.00791856
clusters_0	Mtmr3	3.26984e-07	0.421538	0.245	0.54	0.00795126
clusters_0	Tap2	3.31695e-07	0.473915	0.165	0.395	0.00806584
clusters_0	Uba52	3.39612e-07	0.542512	0.153	0.389	0.00825835
clusters_0	Rps27a	3.4332e-07	0.678562	0.847	0.975	0.0083485
clusters_0	Chd4	3.51157e-07	0.246902	0.137	0.348	0.00853909
clusters_0	Soat1	3.54966e-07	0.513795	0.209	0.466	0.00863171
clusters_0	Sra1	3.55942e-07	0.668209	0.201	0.463	0.00865544
clusters_0	Rcsd1	3.56691e-07	0.249466	0.092	0.274	0.00867364
clusters_0	Klra2	3.65675e-07	0.246134	0.241	0.523	0.00889211
clusters_0	Man2b1	3.81159e-07	-0.247992	0.096	0.271	0.00926865
clusters_0	Sp110	3.8515e-07	0.321712	0.189	0.438	0.00936569
clusters_0	Sod2	3.91196e-07	0.578943	0.325	0.677	0.00951272
clusters_0	Rilpl2	3.94777e-07	0.450915	0.137	0.342	0.0095998
clusters_0	H13	3.96124e-07	0.244193	0.181	0.419	0.00963254
clusters_0	Rnpep	3.9744e-07	0.374718	0.092	0.274	0.00966454
clusters_0	Bnip3l	4.04407e-07	0.462945	0.261	0.586	0.00983398
clusters_0	Paip2	4.08888e-07	0.405958	0.185	0.427	0.00994294
clusters_0	Grk5	4.18533e-07	-0.535488	0.1	0.282	0.0101775
clusters_0	Rabac1	4.20119e-07	0.354484	0.217	0.493	0.010216
clusters_0	Clta	4.20221e-07	0.413592	0.293	0.66	0.0102185
clusters_0	Atp6ap1	4.39479e-07	0.129453	0.116	0.31	0.0106868
clusters_0	Cped1	4.42489e-07	0.202366	0.076	0.252	0.01076
clusters_0	Ube2b	4.43487e-07	0.274023	0.345	0.734	0.0107843
clusters_0	Srp9	4.47038e-07	0.17302	0.149	0.37	0.0108706
clusters_0	Washc2	4.58865e-07	0.220511	0.116	0.318	0.0111582
clusters_0	Rabgef1	4.68615e-07	0.312763	0.369	0.74	0.0113953
clusters_0	Rps18	4.69997e-07	1.78729	0.582	0.707	0.0114289
clusters_0	Marcks	4.70919e-07	0.117704	0.353	0.71	0.0114513
clusters_0	Arih1	4.74552e-07	0.66472	0.297	0.641	0.0115397
clusters_0	Abca1	4.76016e-07	0.323834	0.169	0.4	0.0115753
clusters_0	Adprh	4.83064e-07	0.585038	0.161	0.392	0.0117467
clusters_0	Mir142hg	4.89347e-07	0.254751	0.406	0.808	0.0118995
clusters_0	Inpp4a	4.99962e-07	0.12981	0.092	0.268	0.0121576
clusters_0	Snrpc	5.06269e-07	0.442001	0.108	0.299	0.0123109
clusters_0	Ezr	5.07097e-07	0.111426	0.382	0.8	0.0123311
clusters_0	Sf3b1	5.11248e-07	0.347072	0.333	0.742	0.012432
clusters_0	Crk	5.14131e-07	0.458121	0.149	0.359	0.0125021
clusters_0	Txnl1	5.20458e-07	0.316802	0.112	0.301	0.012656
clusters_0	Top1	5.3784e-07	0.352873	0.289	0.636	0.0130787
clusters_0	Acsl4	5.78589e-07	-0.112991	0.1	0.277	0.0140695
clusters_0	Rpl32	5.95894e-07	1.293	0.655	0.849	0.0144904
clusters_0	Sirpa	5.98117e-07	0.4742	0.177	0.422	0.0145444
clusters_0	Azi2	5.99335e-07	0.231992	0.177	0.416	0.014574
clusters_0	Arih2	6.01197e-07	0.265112	0.249	0.54	0.0146193
clusters_0	Eif2s3y	6.04938e-07	-0.147602	0.092	0.268	0.0147103
clusters_0	Trir	6.05955e-07	0.493687	0.173	0.408	0.014735
clusters_0	Zfand3	6.13044e-07	0.278992	0.357	0.756	0.0149074
clusters_0	Cdk17	6.36158e-07	0.565168	0.161	0.384	0.0154695
clusters_0	Mdh2	6.46088e-07	0.384518	0.173	0.408	0.0157109
clusters_0	Ndufb8	6.78252e-07	0.119352	0.124	0.321	0.016493
clusters_0	Ilrun	6.82849e-07	0.464944	0.233	0.518	0.0166048
clusters_0	Map2k1	6.86813e-07	0.46846	0.209	0.477	0.0167012
clusters_0	Elob	6.98295e-07	0.370847	0.341	0.751	0.0169804
clusters_0	Snx3	7.01494e-07	0.501515	0.257	0.545	0.0170582
clusters_0	Retreg1	7.0489e-07	0.496959	0.293	0.63	0.0171408
clusters_0	A930037H05Rik	7.14055e-07	0.221588	0.165	0.395	0.0173637
clusters_0	Mctp1	7.31842e-07	0.40847	0.201	0.452	0.0177962
clusters_0	Rassf3	7.321e-07	0.136875	0.1	0.282	0.0178025
clusters_0	Dock8	7.4325e-07	0.375512	0.173	0.419	0.0180736
clusters_0	Tomm7	7.79568e-07	0.247672	0.225	0.501	0.0189568
clusters_0	Arpc1b	7.94645e-07	-0.150301	0.562	0.948	0.0193234
clusters_0	Rab10	8.06205e-07	0.294269	0.177	0.425	0.0196045
clusters_0	Tor1aip2	8.15708e-07	0.329353	0.225	0.49	0.0198356
clusters_0	Frg1	8.22204e-07	0.595768	0.108	0.29	0.0199935
clusters_0	Emd	8.25374e-07	0.532935	0.185	0.422	0.0200706
clusters_0	Rpl41	8.56831e-07	0.798434	0.727	0.953	0.0208356
clusters_0	Dph3	8.59146e-07	0.143784	0.189	0.427	0.0208919
clusters_0	Slc3a2	8.78402e-07	0.331441	0.241	0.532	0.0213601
clusters_0	Mkrn1	8.93522e-07	0.280043	0.149	0.37	0.0217278
clusters_0	Psmd4	9.07348e-07	0.385047	0.133	0.332	0.022064
clusters_0	Pfdn5	9.09831e-07	0.33061	0.361	0.786	0.0221244
clusters_0	Chchd2	9.11206e-07	0.280841	0.369	0.811	0.0221578
clusters_0	Il1r2	9.13501e-07	-0.118794	0.647	0.984	0.0222136
clusters_0	Brk1	9.74318e-07	0.4728	0.221	0.496	0.0236925
clusters_0	Pitpna	9.77494e-07	0.297833	0.349	0.751	0.0237697
clusters_0	Dnajb6	9.92178e-07	0.181125	0.345	0.715	0.0241268
clusters_0	Gsr	9.97517e-07	-0.161577	0.542	0.956	0.0242566
clusters_0	Slc25a3	1.01018e-06	0.616836	0.253	0.57	0.0245646
clusters_0	Dock11	1.01937e-06	0.428024	0.169	0.392	0.024788
clusters_0	Rpl35a	1.02213e-06	1.0789	0.683	0.915	0.0248551
clusters_0	Cox7a2	1.06549e-06	0.540975	0.293	0.666	0.0259095
clusters_0	Ccnt1	1.07459e-06	0.203898	0.149	0.353	0.0261307
clusters_0	Esd	1.10006e-06	0.102552	0.39	0.781	0.0267503
clusters_0	Gdi2	1.10591e-06	0.403408	0.161	0.375	0.0268925
clusters_0	Sephs2	1.10807e-06	0.126571	0.092	0.258	0.026945
clusters_0	Cdc40	1.11838e-06	0.219424	0.1	0.274	0.0271957
clusters_0	Cebpb	1.14368e-06	-0.25235	0.803	0.995	0.0278108
clusters_0	Pttg1	1.14908e-06	0.306047	0.281	0.581	0.0279422
clusters_0	Atp5j2	1.17147e-06	0.670176	0.209	0.479	0.0284866
clusters_0	Anxa2	1.21672e-06	-0.148956	0.546	0.959	0.029587
clusters_0	Nedd8	1.24729e-06	0.451281	0.221	0.507	0.0303305
clusters_0	Ppp2ca	1.24903e-06	0.372519	0.229	0.51	0.0303726
clusters_0	Rpl21	1.26688e-06	1.31465	0.647	0.849	0.0308066
clusters_0	Gsap	1.26855e-06	0.120077	0.325	0.638	0.0308474
clusters_0	Krcc1	1.27e-06	0.112911	0.108	0.288	0.0308827
clusters_0	Rlim	1.27054e-06	0.459879	0.153	0.37	0.0308956
clusters_0	Gclm	1.27299e-06	0.408436	0.133	0.334	0.0309553
clusters_0	Tmed7	1.32832e-06	0.369742	0.096	0.268	0.0323008
clusters_0	Parp12	1.34301e-06	0.637739	0.197	0.449	0.032658
clusters_0	Sec62	1.35177e-06	0.592125	0.209	0.466	0.0328709
clusters_0	Mcl1	1.37572e-06	-0.298053	0.691	0.984	0.0334535
clusters_0	Scand1	1.37977e-06	0.403084	0.341	0.723	0.0335519
clusters_0	H2-T24	1.39229e-06	0.362758	0.12	0.304	0.0338564
clusters_0	Psme2	1.41175e-06	0.308887	0.329	0.682	0.0343294
clusters_0	Zswim6	1.48153e-06	0.289407	0.245	0.515	0.0360264
clusters_0	Atp5h	1.50024e-06	0.47249	0.277	0.619	0.0364813
clusters_0	Rnf34	1.51261e-06	0.365976	0.221	0.471	0.0367822
clusters_0	Slpi	1.52834e-06	0.213574	0.562	0.921	0.0371646
clusters_0	Cox7b	1.55438e-06	0.369818	0.165	0.392	0.0377979
clusters_0	Rpl17	1.5762e-06	1.01222	0.675	0.893	0.0383285
clusters_0	Tle3	1.62497e-06	0.547536	0.104	0.282	0.0395144
clusters_0	Cux1	1.62654e-06	0.688584	0.337	0.696	0.0395525
clusters_0	Lrrc25	1.67884e-06	0.216445	0.181	0.408	0.0408244
clusters_0	Fgd3	1.6857e-06	0.319164	0.177	0.4	0.0409911
clusters_0	Sbno2	1.68929e-06	0.267071	0.173	0.4	0.0410784
clusters_0	Resf1	1.69447e-06	0.377893	0.422	0.811	0.0412043
clusters_0	Csde1	1.70887e-06	0.371132	0.197	0.447	0.0415546
clusters_0	Rnf11	1.72742e-06	0.454393	0.181	0.403	0.0420057
clusters_0	Sec11c	1.72786e-06	0.581238	0.173	0.4	0.0420163
clusters_0	2025-03-01	1.74523e-06	0.17941	0.1	0.277	0.0424388
clusters_0	Bzw1	1.74817e-06	0.546671	0.165	0.395	0.0425101
clusters_0	Hmox1	1.76815e-06	0.365191	0.213	0.468	0.0429961
clusters_0	Zfand5	1.87531e-06	0.417768	0.305	0.627	0.045602
clusters_0	Tomm22	1.8968e-06	0.388554	0.169	0.381	0.0461246
clusters_0	Glg1	1.90919e-06	0.128679	0.088	0.255	0.0464259
clusters_0	Ero1l	1.92287e-06	0.31903	0.253	0.504	0.0467583
clusters_0	Pitpnc1	1.94206e-06	0.211784	0.205	0.458	0.0472252
clusters_0	Gpx4	1.95779e-06	0.611263	0.289	0.644	0.0476076
clusters_0	Trp53inp1	1.97577e-06	0.801922	0.104	0.279	0.0480447
clusters_0	Tbc1d14	2.05434e-06	-0.119068	0.096	0.26	0.0499553
clusters_0	Raf1	2.0659e-06	0.285234	0.165	0.384	0.0502366
clusters_0	Irf1	2.19867e-06	0.321357	0.281	0.592	0.0534651
clusters_0	Gm10076	2.22914e-06	0.429996	0.133	0.329	0.054206
clusters_0	Ppib	2.23527e-06	0.333935	0.237	0.537	0.0543552
clusters_0	Psmb8	2.32812e-06	0.130561	0.386	0.77	0.0566129
clusters_0	Sik3	2.35309e-06	0.605983	0.402	0.816	0.05722
clusters_0	Ghitm	2.43508e-06	0.514954	0.157	0.367	0.0592138
clusters_0	Tab2	2.49037e-06	0.344635	0.165	0.384	0.0605584
clusters_0	Lgals9	2.4979e-06	0.235925	0.378	0.762	0.0607415
clusters_0	Atp5e	2.51434e-06	0.420636	0.321	0.704	0.0611411
clusters_0	Eno1	2.52479e-06	0.403843	0.309	0.663	0.0613953
clusters_0	Slc9a3r1	2.57684e-06	0.553622	0.205	0.449	0.062661
clusters_0	Rps10	2.66356e-06	0.902815	0.727	0.929	0.0647698
clusters_0	Ppp2r5c	2.67373e-06	0.361977	0.165	0.375	0.0650171
clusters_0	Orai1	2.80501e-06	0.509335	0.12	0.304	0.0682095
clusters_0	Synj1	2.83273e-06	0.574333	0.177	0.395	0.0688834
clusters_0	mt-Co3	2.85729e-06	1.34365	0.743	0.956	0.0694808
clusters_0	Pabpc1	2.87422e-06	0.242229	0.297	0.655	0.0698924
clusters_0	Cd300a	2.94793e-06	0.255961	0.169	0.381	0.0716849
clusters_0	Pfkl	2.94802e-06	0.135713	0.145	0.342	0.0716869
clusters_0	Sh3bgrl3	3.01634e-06	-0.122987	0.578	0.959	0.0733483
clusters_0	Vcpip1	3.10231e-06	0.297507	0.133	0.321	0.0754389
clusters_0	Ifih1	3.12995e-06	0.337683	0.325	0.641	0.076111
clusters_0	Pik3c2a	3.19255e-06	0.40397	0.169	0.381	0.0776333
clusters_0	Ifi47	3.20506e-06	0.23602	0.337	0.658	0.0779375
clusters_0	Csnk1a1	3.21617e-06	0.538316	0.225	0.493	0.0782076
clusters_0	Morf4l1	3.26761e-06	0.701498	0.265	0.584	0.0794586
clusters_0	Uqcrh	3.31565e-06	0.470301	0.293	0.644	0.0806266
clusters_0	Plekhf2	3.46089e-06	0.339633	0.096	0.266	0.0841585
clusters_0	Oas1a	3.46674e-06	0.401299	0.165	0.386	0.0843006
clusters_0	Ptp4a2	3.57027e-06	0.495851	0.149	0.351	0.0868182
clusters_0	Ap2m1	3.57786e-06	0.538107	0.096	0.26	0.0870028
clusters_0	Ets2	3.59334e-06	0.129264	0.47	0.907	0.0873792
clusters_0	Sec61g	3.64843e-06	0.400177	0.253	0.542	0.0887188
clusters_0	Hk3	3.67512e-06	0.524068	0.133	0.329	0.0893678
clusters_0	Lcor	3.7875e-06	0.359636	0.173	0.375	0.0921007
clusters_0	1810058I24Rik	3.84706e-06	0.636584	0.193	0.433	0.0935489
clusters_0	Cpne1	3.84917e-06	0.781442	0.1	0.263	0.0936003
clusters_0	Slc31a2	3.88484e-06	0.628955	0.157	0.373	0.0944676
clusters_0	Btbd7	3.91289e-06	0.368524	0.165	0.37	0.0951497
clusters_0	Micos10	3.93238e-06	0.265872	0.141	0.323	0.0956237
clusters_0	Myo1d	4.18093e-06	0.294449	0.124	0.315	0.101668
clusters_0	Smdt1	4.29513e-06	0.633204	0.161	0.375	0.104445
clusters_0	Ist1	4.32619e-06	0.276402	0.177	0.392	0.1052
clusters_0	Cab39	4.34302e-06	0.626742	0.185	0.405	0.105609
clusters_0	Ythdc1	4.35933e-06	0.388443	0.197	0.433	0.106006
clusters_0	Hk1	4.37034e-06	0.257727	0.137	0.318	0.106274
clusters_0	Sdf4	4.41746e-06	0.381199	0.141	0.329	0.107419
clusters_0	Arhgap24	4.41779e-06	0.758239	0.209	0.46	0.107427
clusters_0	Gphn	4.43701e-06	0.763528	0.157	0.362	0.107895
clusters_0	Ube2h	4.54799e-06	0.461969	0.205	0.433	0.110594
clusters_0	Eef1a1	4.73674e-06	0.89816	0.707	0.896	0.115183
clusters_0	Atxn7l1	4.7697e-06	0.531051	0.197	0.427	0.115985
clusters_0	Ankrd44	4.776e-06	0.377019	0.197	0.427	0.116138
clusters_0	Cxcl3	4.78142e-06	-0.648637	0.173	0.364	0.11627
clusters_0	Cdkn1b	4.78939e-06	0.223012	0.133	0.312	0.116464
clusters_0	Bcl3	4.92171e-06	0.376692	0.104	0.268	0.119681
clusters_0	Ndufb10	4.94855e-06	0.449215	0.108	0.277	0.120334
clusters_0	Hsp90aa1	5.04179e-06	0.582082	0.305	0.627	0.122601
clusters_0	Pgls	5.11139e-06	0.140814	0.104	0.263	0.124294
clusters_0	Golph3	5.12559e-06	0.564226	0.12	0.296	0.124639
clusters_0	Smim14	5.15334e-06	0.287925	0.149	0.345	0.125314
clusters_0	Rpl22l1	5.15993e-06	0.430628	0.161	0.381	0.125474
clusters_0	Ppp6c	5.16418e-06	0.177414	0.108	0.274	0.125577
clusters_0	Med13	5.16745e-06	0.605513	0.181	0.397	0.125657
clusters_0	Cdc27	5.2567e-06	0.335951	0.145	0.326	0.127827
clusters_0	Ptbp3	5.57606e-06	0.218526	0.458	0.877	0.135593
clusters_0	Arhgdia	5.64173e-06	0.509707	0.213	0.455	0.13719
clusters_0	Cox6a1	5.70591e-06	0.759165	0.181	0.405	0.138751
clusters_0	Ndufs5	5.82528e-06	0.248925	0.116	0.279	0.141653
clusters_0	Map3k5	5.82901e-06	0.695151	0.181	0.389	0.141744
clusters_0	Celf2	5.86772e-06	0.563256	0.257	0.559	0.142685
clusters_0	Ppp6r3	5.88748e-06	0.279552	0.129	0.304	0.143166
clusters_0	Selenon	5.96027e-06	0.480462	0.157	0.359	0.144936
clusters_0	Lmnb1	6.0734e-06	-0.11946	0.574	0.97	0.147687
clusters_0	Mirt2	6.10389e-06	0.533918	0.201	0.438	0.148428
clusters_0	Il2rg	6.33018e-06	0.115417	0.129	0.301	0.153931
clusters_0	Shisa5	6.39177e-06	0.364469	0.309	0.663	0.155429
clusters_0	Slc11a1	6.6358e-06	0.490252	0.277	0.562	0.161363
clusters_0	Lman2	6.68602e-06	0.658803	0.124	0.304	0.162584
clusters_0	Rps16	6.69286e-06	0.812792	0.719	0.937	0.16275
clusters_0	Eif4g3	6.81863e-06	0.143985	0.145	0.337	0.165809
clusters_0	Sos2	6.83166e-06	0.356859	0.104	0.274	0.166126
clusters_0	Hcar2	6.88828e-06	0.421808	0.313	0.611	0.167502
clusters_0	H2-T22	6.94334e-06	0.450051	0.221	0.471	0.168841
clusters_0	Fndc3a	7.05176e-06	0.117868	0.39	0.732	0.171478
clusters_0	Ep300	7.13691e-06	0.139488	0.149	0.342	0.173548
clusters_0	Crlf3	7.18419e-06	0.466156	0.157	0.351	0.174698
clusters_0	Mafg	7.24349e-06	0.291202	0.092	0.252	0.17614
clusters_0	Slc28a2	7.35925e-06	0.103867	0.104	0.263	0.178955
clusters_0	Trip11	7.63185e-06	0.288206	0.104	0.26	0.185584
clusters_0	Ipcef1	7.70918e-06	0.411975	0.137	0.318	0.187464
clusters_0	Il13ra1	7.81774e-06	0.642104	0.225	0.471	0.190104
clusters_0	Ptma	7.86076e-06	1.77184	0.558	0.671	0.19115
clusters_0	Oas3	7.87592e-06	0.701309	0.213	0.455	0.191519
clusters_0	Tra2b	8.12592e-06	0.606498	0.153	0.342	0.197598
clusters_0	Rps20	8.30617e-06	1.29981	0.655	0.849	0.201981
clusters_0	Csnk1g1	8.31217e-06	0.182468	0.096	0.252	0.202127
clusters_0	Plcl2	8.36415e-06	0.230614	0.12	0.288	0.203391
clusters_0	Myo9b	8.46544e-06	0.561561	0.104	0.266	0.205854
clusters_0	Lrrfip2	8.65872e-06	0.778709	0.221	0.468	0.210554
clusters_0	Snap23	8.71742e-06	0.596489	0.293	0.6	0.211981
clusters_0	Psmb1	8.88663e-06	0.711321	0.173	0.389	0.216096
clusters_0	Gm26740	8.92875e-06	0.495677	0.237	0.479	0.21712
clusters_0	Kansl1	9.11098e-06	0.394871	0.189	0.408	0.221552
clusters_0	Chd7	9.25425e-06	0.455393	0.349	0.715	0.225036
clusters_0	Mefv	9.3031e-06	0.142457	0.096	0.258	0.226223
clusters_0	Smad4	9.34829e-06	0.577049	0.193	0.414	0.227322
clusters_0	Arhgap26	9.62962e-06	0.354485	0.197	0.416	0.234164
clusters_0	Tmem167	9.76283e-06	0.795131	0.205	0.449	0.237403
clusters_0	Tbca	9.99654e-06	0.715028	0.149	0.342	0.243086
clusters_0	Gpd2	1.00277e-05	0.161061	0.129	0.301	0.243842
clusters_0	Rhoh	1.00834e-05	0.318576	0.173	0.364	0.245199
clusters_0	Irf2	1.03192e-05	0.216132	0.373	0.715	0.250932
clusters_0	Sntb2	1.05658e-05	0.501086	0.161	0.353	0.256928
clusters_0	Fus	1.06776e-05	0.553292	0.221	0.463	0.259646
clusters_0	Prpf40a	1.12675e-05	0.431019	0.149	0.337	0.273991
clusters_0	B4galt5	1.19908e-05	0.778723	0.153	0.342	0.291581
clusters_0	Jak2	1.26731e-05	0.317916	0.253	0.499	0.308171
clusters_0	Lyn	1.30469e-05	0.124594	0.57	0.967	0.317262
clusters_0	P4hb	1.335e-05	0.500804	0.181	0.386	0.324631
clusters_0	Chd2	1.33921e-05	0.373274	0.273	0.54	0.325655
clusters_0	Arg2	1.34829e-05	0.233752	0.434	0.841	0.327863
clusters_0	Raly	1.36211e-05	0.311133	0.108	0.268	0.331224
clusters_0	Nrbp1	1.36655e-05	0.222254	0.104	0.26	0.332304
clusters_0	Eif5a	1.40034e-05	0.456081	0.325	0.677	0.34052
clusters_0	Arf4	1.40593e-05	0.481407	0.317	0.66	0.341881
clusters_0	Ankrd13a	1.43559e-05	0.243029	0.104	0.255	0.349092
clusters_0	Adss	1.47034e-05	0.270425	0.108	0.263	0.357544
clusters_0	Etf1	1.47565e-05	0.499212	0.337	0.69	0.358834
clusters_0	Casp8	1.47905e-05	0.561284	0.169	0.356	0.359659
clusters_0	Tax1bp1	1.4823e-05	0.125307	0.446	0.868	0.360452
clusters_0	Hspa5	1.51739e-05	0.397524	0.369	0.756	0.368985
clusters_0	Rnf213	1.56443e-05	0.690133	0.478	0.858	0.380422
clusters_0	Rbms1	1.58279e-05	0.433957	0.386	0.781	0.384886
clusters_0	Nlrc5	1.6264e-05	0.398882	0.241	0.49	0.395492
clusters_0	Xrn2	1.62947e-05	0.326059	0.169	0.373	0.396238
clusters_0	Cwc15	1.63277e-05	0.581169	0.153	0.34	0.397041
clusters_0	Wac	1.66938e-05	0.47136	0.177	0.386	0.405943
clusters_0	Utrn	1.70658e-05	1.04867	0.177	0.381	0.414989
clusters_0	Ube2l6	1.713e-05	0.301378	0.145	0.334	0.416551
clusters_0	Jun	1.76928e-05	-0.243425	0.414	0.704	0.430235
clusters_0	Clip1	1.78066e-05	0.367963	0.12	0.279	0.433003
clusters_0	Leprotl1	1.79678e-05	0.693455	0.185	0.4	0.436924
clusters_0	Atp5a1	1.83023e-05	0.433265	0.133	0.312	0.445056
clusters_0	Olr1	1.83678e-05	-0.231889	0.108	0.26	0.446651
clusters_0	Cwc25	1.83721e-05	0.723395	0.141	0.326	0.446754
clusters_0	Mier1	1.87001e-05	0.553112	0.229	0.474	0.45473
clusters_0	Psmc6	1.88092e-05	0.430423	0.104	0.255	0.457384
clusters_0	Atox1	1.89932e-05	0.654702	0.317	0.655	0.461857
clusters_0	Mpp1	1.94388e-05	0.69404	0.149	0.334	0.472694
clusters_0	Rictor	2.00077e-05	0.409876	0.129	0.293	0.486527
clusters_0	Myl12b	2.0025e-05	0.103957	0.494	0.901	0.486948
clusters_0	Baz1a	2.09575e-05	0.530922	0.201	0.43	0.509625
clusters_0	Rps24	2.12264e-05	0.725383	0.819	0.973	0.516161
clusters_0	Lrrc8d	2.14834e-05	0.583362	0.201	0.422	0.522413
clusters_0	Aprt	2.16531e-05	0.808246	0.193	0.408	0.52654
clusters_0	2410006H16Rik	2.17562e-05	1.06838	0.201	0.436	0.529045
clusters_0	Eif5	2.19909e-05	0.346804	0.265	0.54	0.534752
clusters_0	Edem1	2.20293e-05	0.113391	0.116	0.271	0.535686
clusters_0	Gm13822	2.21241e-05	0.236186	0.317	0.611	0.537992
clusters_0	Tmem189	2.27654e-05	0.599096	0.221	0.463	0.553587
clusters_0	Hnrnpk	2.27921e-05	0.692194	0.273	0.573	0.554236
clusters_0	Casp4	2.29849e-05	0.254311	0.422	0.811	0.558923
clusters_0	Rab7	2.30311e-05	0.232424	0.502	0.915	0.560047
clusters_0	Nrros	2.31976e-05	0.100617	0.149	0.326	0.564096
clusters_0	A930015D03Rik	2.3621e-05	0.213185	0.1	0.255	0.574392
clusters_0	Nr4a1	2.41886e-05	0.366199	0.205	0.427	0.588194
clusters_0	Gatad2a	2.51562e-05	0.629283	0.201	0.414	0.611723
clusters_0	Hspa4	2.56979e-05	0.730211	0.149	0.329	0.624895
clusters_0	Csnk2b	2.59686e-05	0.340646	0.149	0.326	0.631479
clusters_0	Dpm1	2.60555e-05	0.223275	0.124	0.282	0.633591
clusters_0	Fam104a	2.62236e-05	0.289775	0.157	0.332	0.63768
clusters_0	Wsb1	2.629e-05	0.417566	0.217	0.438	0.639293
clusters_0	Lamp1	2.70739e-05	0.555933	0.261	0.529	0.658355
clusters_0	Slfn4	2.71517e-05	0.163251	0.711	0.997	0.660247
clusters_0	Cycs	2.77421e-05	0.408057	0.189	0.392	0.674604
clusters_0	Grcc10	2.7789e-05	0.362812	0.141	0.321	0.675746
clusters_0	Ncor1	2.84327e-05	0.610825	0.269	0.562	0.691397
clusters_0	Aurkaip1	2.85505e-05	0.435724	0.137	0.307	0.694262
clusters_0	Snx2	2.85947e-05	0.175835	0.161	0.34	0.695337
clusters_0	Rap1gds1	2.92405e-05	0.579384	0.108	0.263	0.71104
clusters_0	Tomm6	2.97214e-05	1.04536	0.245	0.504	0.722736
clusters_0	Atp6v1h	3.095e-05	0.830331	0.112	0.263	0.752611
clusters_0	Herc1	3.10602e-05	0.283023	0.209	0.422	0.75529
clusters_0	Dennd1b	3.12579e-05	0.47505	0.193	0.397	0.760098
clusters_0	Atp6v1f	3.16717e-05	0.417476	0.277	0.564	0.77016
clusters_0	Ppp3ca	3.22222e-05	0.417166	0.261	0.518	0.783548
clusters_0	Usp9x	3.23118e-05	0.279578	0.12	0.274	0.785727
clusters_0	Slc25a5	3.30283e-05	0.856594	0.197	0.427	0.803149
clusters_0	B3gnt2	3.33225e-05	0.322146	0.177	0.362	0.810304
clusters_0	Sfpq	3.35712e-05	0.331688	0.124	0.293	0.81635
clusters_0	Nudt4	3.39302e-05	0.708202	0.233	0.482	0.825081
clusters_0	Smg7	3.4188e-05	0.396897	0.12	0.282	0.83135
clusters_0	Kcmf1	3.48093e-05	0.821381	0.181	0.386	0.846459
clusters_0	Rbm25	3.56115e-05	0.816304	0.221	0.466	0.865965
clusters_0	Cebpd	3.5743e-05	0.612105	0.116	0.282	0.869163
clusters_0	Ptprj	3.59949e-05	0.527403	0.233	0.466	0.875288
clusters_0	Wipf1	3.74905e-05	0.618446	0.201	0.416	0.911657
clusters_0	Plcg2	3.80262e-05	0.179357	0.108	0.255	0.924683
clusters_0	Psap	3.81214e-05	0.619965	0.341	0.685	0.926999
clusters_0	Prrc2c	3.81876e-05	0.477585	0.209	0.444	0.928608
clusters_0	Ndufa13	3.83197e-05	0.894672	0.213	0.463	0.931819
clusters_0	Rpl18a	3.95874e-05	1.04335	0.667	0.921	0.962647
clusters_0	Dop1b	4.04458e-05	0.42391	0.149	0.323	0.983521
clusters_0	Adam17	4.17629e-05	0.737485	0.157	0.337	1
clusters_0	Cdk12	4.19766e-05	0.178494	0.112	0.263	1
clusters_0	Ubn1	4.23095e-05	0.501178	0.161	0.337	1
clusters_0	Larp1	4.27226e-05	0.395367	0.137	0.307	1
clusters_0	Tma7	4.28083e-05	0.552101	0.277	0.578	1
clusters_0	Tbc1d20	4.28909e-05	0.378786	0.124	0.282	1
clusters_0	Psmb2	4.30617e-05	0.62407	0.153	0.337	1
clusters_0	Trim30c	4.31502e-05	0.243813	0.209	0.414	1
clusters_0	Vapa	4.33102e-05	0.662009	0.277	0.562	1
clusters_0	Derl1	4.40786e-05	0.455559	0.137	0.304	1
clusters_0	Rragc	4.4262e-05	0.448681	0.116	0.271	1
clusters_0	Rab11b	4.45867e-05	0.474339	0.161	0.34	1
clusters_0	Ddx24	4.565e-05	0.594085	0.177	0.373	1
clusters_0	Arid5a	4.56724e-05	0.399858	0.157	0.332	1
clusters_0	Cox8a	4.63237e-05	0.152229	0.426	0.868	1
clusters_0	Polr1d	4.64977e-05	0.823965	0.193	0.419	1
clusters_0	Lsm12	4.8358e-05	0.612696	0.137	0.301	1
clusters_0	Aff4	4.85307e-05	0.448746	0.241	0.477	1
clusters_0	Psma7	4.95249e-05	0.749312	0.277	0.57	1
clusters_0	2025-03-07	4.96364e-05	0.568851	0.297	0.597	1
clusters_0	Aoah	5.03255e-05	0.742085	0.225	0.444	1
clusters_0	Hbp1	5.29051e-05	0.426913	0.129	0.285	1
clusters_0	Ifi27	5.29927e-05	0.678602	0.133	0.293	1
clusters_0	Npc2	5.45576e-05	0.810917	0.329	0.655	1
clusters_0	Ythdf3	5.56185e-05	0.720633	0.197	0.403	1
clusters_0	Rbpj	5.66441e-05	0.348085	0.245	0.49	1
clusters_0	Atp5mpl	5.88408e-05	0.562952	0.145	0.315	1
clusters_0	Pim1	6.06702e-05	0.242202	0.522	0.921	1
clusters_0	Ctsb	6.14135e-05	0.842898	0.337	0.693	1
clusters_0	Hnrnpc	6.14936e-05	0.497255	0.229	0.458	1
clusters_0	Bbx	6.1999e-05	0.384177	0.177	0.367	1
clusters_0	Pml	6.31171e-05	0.184601	0.116	0.26	1
clusters_0	Irgm2	6.6763e-05	0.594596	0.157	0.337	1
clusters_0	Eif4e2	6.74946e-05	0.324574	0.124	0.271	1
clusters_0	Xrn1	6.84803e-05	0.511239	0.137	0.293	1
clusters_0	Rgcc	6.94297e-05	0.199908	0.189	0.381	1
clusters_0	Igtp	6.94298e-05	0.54065	0.173	0.356	1
clusters_0	Pnisr	7.02977e-05	0.551242	0.124	0.282	1
clusters_0	Chmp4b	7.18053e-05	0.119655	0.474	0.882	1
clusters_0	Itpkb	7.52294e-05	0.509069	0.193	0.386	1
clusters_0	Pcbp2	7.66353e-05	0.850297	0.209	0.43	1
clusters_0	Med13l	7.72152e-05	1.19097	0.173	0.353	1
clusters_0	Fli1	7.76557e-05	0.487335	0.161	0.342	1
clusters_0	Akirin1	7.79627e-05	0.51542	0.124	0.277	1
clusters_0	Crebrf	7.79941e-05	0.882862	0.157	0.337	1
clusters_0	Herc6	7.93014e-05	0.181885	0.434	0.756	1
clusters_0	Tnfrsf1b	8.05523e-05	0.605274	0.305	0.584	1
clusters_0	Nfkbib	8.19741e-05	0.313172	0.133	0.288	1
clusters_0	Spcs2	8.24457e-05	0.760342	0.165	0.351	1
clusters_0	Foxo3	8.25325e-05	0.748939	0.153	0.329	1
clusters_0	Adar	8.30002e-05	0.523771	0.149	0.312	1
clusters_0	Itpr2	8.41088e-05	0.616993	0.181	0.378	1
clusters_0	Ctnnb1	8.64853e-05	0.991289	0.161	0.334	1
clusters_0	Rrbp1	8.65712e-05	0.816926	0.253	0.515	1
clusters_0	H3f3b	8.75708e-05	-0.119721	0.888	0.997	1
clusters_0	Osbpl8	8.90006e-05	0.656392	0.241	0.458	1
clusters_0	Sbno1	8.91004e-05	0.633919	0.229	0.449	1
clusters_0	Atp5c1	8.94893e-05	0.639196	0.185	0.392	1
clusters_0	Ppp4r2	9.19587e-05	0.865936	0.141	0.312	1
clusters_0	mt-Atp6	9.20191e-05	1.28466	0.711	0.94	1
clusters_0	Rsrp1	9.50538e-05	0.578594	0.217	0.441	1
clusters_0	Arhgap25	9.55073e-05	0.160239	0.116	0.26	1
clusters_0	Cope	9.61738e-05	0.688359	0.129	0.282	1
clusters_0	Ube2n	9.65722e-05	0.469409	0.173	0.353	1
clusters_0	Inpp5a	9.75959e-05	0.546009	0.217	0.427	1
clusters_0	Dnajc8	9.79036e-05	0.755918	0.153	0.323	1
clusters_0	Coq10b	9.82865e-05	0.680012	0.193	0.386	1
clusters_0	Ascc3	9.85441e-05	0.466051	0.43	0.827	1
clusters_0	Cd9	9.95417e-05	0.156661	0.522	0.937	1
clusters_0	Psma2	9.96802e-05	0.783429	0.229	0.471	1
clusters_0	Rb1cc1	0.000101701	0.843771	0.193	0.378	1
clusters_0	Yy1	0.00010276	0.590199	0.141	0.304	1
clusters_0	Psma1	0.000104276	0.471348	0.141	0.296	1
clusters_0	Atp5o	0.00010568	0.335685	0.12	0.271	1
clusters_0	Mapk1ip1l	0.000106893	0.375604	0.116	0.258	1
clusters_0	Gsk3b	0.000107633	0.54976	0.153	0.323	1
clusters_0	Qk	0.000108068	0.549967	0.209	0.411	1
clusters_0	Dek	0.000108267	0.577835	0.129	0.282	1
clusters_0	Ube2f	0.000109324	0.439014	0.116	0.255	1
clusters_0	Bhlhe40	0.000113625	0.621873	0.161	0.342	1
clusters_0	Akap13	0.000114993	0.650528	0.277	0.556	1
clusters_0	Nlrp3	0.000119072	1.01267	0.301	0.573	1
clusters_0	Ranbp9	0.000119738	0.401128	0.129	0.282	1
clusters_0	Fbxo11	0.000120397	0.752484	0.285	0.545	1
clusters_0	BC005537	0.000120571	0.861723	0.157	0.326	1
clusters_0	Lpin2	0.000120767	1.02955	0.145	0.301	1
clusters_0	Rybp	0.000124434	1.02401	0.277	0.532	1
clusters_0	Rab44	0.000126022	0.908784	0.145	0.315	1
clusters_0	Tpr	0.000131172	0.747043	0.209	0.416	1
clusters_0	Hdc	0.00013632	0.18035	0.594	0.97	1
clusters_0	Psma3	0.00013985	0.658013	0.225	0.455	1
clusters_0	Dbi	0.00014015	0.585815	0.116	0.26	1
clusters_0	Ramac	0.000141727	0.663994	0.149	0.304	1
clusters_0	Atad2b	0.000142336	0.744242	0.165	0.334	1
clusters_0	Phip	0.000144444	0.727714	0.141	0.299	1
clusters_0	Nampt	0.000145603	0.462485	0.378	0.696	1
clusters_0	Rps3	0.00014561	1.25909	0.606	0.792	1
clusters_0	Slfn2	0.000148553	0.142321	0.582	0.962	1
clusters_0	Sumo2	0.000149005	0.992771	0.209	0.427	1
clusters_0	Tbl1xr1	0.000151054	0.340328	0.124	0.268	1
clusters_0	Rnf149	0.000153307	0.48249	0.369	0.685	1
clusters_0	Pip4k2a	0.000156715	0.2846	0.165	0.326	1
clusters_0	Os9	0.000160786	0.984773	0.12	0.266	1
clusters_0	Tut4	0.000161253	0.349403	0.193	0.375	1
clusters_0	Dock2	0.000164384	0.361676	0.373	0.74	1
clusters_0	Rps21	0.000165581	1.15547	0.606	0.86	1
clusters_0	Hsbp1	0.000172401	0.715999	0.141	0.29	1
clusters_0	Dclre1c	0.000174284	0.471209	0.181	0.356	1
clusters_0	Abtb2	0.000177892	0.857769	0.337	0.638	1
clusters_0	Brd4	0.000179587	0.774034	0.229	0.447	1
clusters_0	Fnbp1	0.000180016	0.301757	0.141	0.299	1
clusters_0	Macf1	0.00018093	0.583709	0.157	0.326	1
clusters_0	Ndufa6	0.000181782	0.718626	0.181	0.362	1
clusters_0	Nfe2l2	0.000185938	0.698829	0.349	0.668	1
clusters_0	Rps2	0.000187003	1.66379	0.538	0.723	1
clusters_0	Csf2rb	0.000187559	0.975098	0.293	0.575	1
clusters_0	Tnip1	0.000188171	0.426587	0.201	0.381	1
clusters_0	Eef2	0.000193287	0.839869	0.241	0.504	1
clusters_0	Cmip	0.000193487	0.506287	0.47	0.877	1
clusters_0	H2-Q4	0.000193887	0.897447	0.181	0.362	1
clusters_0	Gnas	0.000196505	0.457646	0.333	0.663	1
clusters_0	Stat3	0.000201346	0.583203	0.386	0.762	1
clusters_0	1810026B05Rik	0.000202569	0.719727	0.201	0.386	1
clusters_0	Apobec1	0.000215558	0.827921	0.153	0.323	1
clusters_0	Svbp	0.000215575	0.699342	0.116	0.252	1
clusters_0	P4ha1	0.000215883	1.00426	0.145	0.296	1
clusters_0	Parp9	0.000217633	0.648432	0.345	0.649	1
clusters_0	Pdia3	0.000227651	0.64898	0.185	0.386	1
clusters_0	Ubap1	0.000234875	0.669178	0.193	0.381	1
clusters_0	Tm6sf1	0.000239495	0.632034	0.145	0.301	1
clusters_0	Bcl6	0.000243957	0.4902	0.161	0.329	1
clusters_0	Tpi1	0.000244681	0.64758	0.289	0.573	1
clusters_0	Psmd8	0.000247597	0.618601	0.169	0.337	1
clusters_0	Zfp407	0.000251996	0.520073	0.149	0.301	1
clusters_0	Lst1	0.000259386	0.70771	0.317	0.597	1
clusters_0	Elmo1	0.000262429	0.877629	0.349	0.658	1
clusters_0	Zbtb20	0.000267142	0.448136	0.157	0.318	1
clusters_0	Spag9	0.000273065	0.685089	0.418	0.764	1
clusters_0	Arhgap31	0.000280006	0.516707	0.181	0.345	1
clusters_0	Hnrnpd	0.000281958	0.58288	0.165	0.332	1
clusters_0	Trim30d	0.000284741	0.417622	0.329	0.63	1
clusters_0	Mgat5	0.000289063	0.657459	0.173	0.356	1
clusters_0	Rplp0	0.000292625	0.765168	0.719	0.91	1
clusters_0	Trim12a	0.000302283	0.617075	0.297	0.562	1
clusters_0	Tiparp	0.000305576	0.586878	0.458	0.83	1
clusters_0	Ube2d3	0.000310144	0.121856	0.498	0.923	1
clusters_0	Cep350	0.000322374	0.615766	0.141	0.29	1
clusters_0	Srsf3	0.000336367	0.929581	0.213	0.43	1
clusters_0	Ccl3	0.000342877	0.823325	0.353	0.603	1
clusters_0	Gna13	0.000343138	0.741566	0.253	0.477	1
clusters_0	Tmem243	0.000352809	0.736343	0.141	0.285	1
clusters_0	Gpbp1	0.000358472	0.674847	0.209	0.395	1
clusters_0	Magoh	0.000365775	0.694218	0.129	0.268	1
clusters_0	Luc7l2	0.000366175	0.754168	0.281	0.545	1
clusters_0	Eea1	0.000371398	0.689348	0.185	0.364	1
clusters_0	Fth1	0.000372299	0.108609	0.968	0.997	1
clusters_0	Bsg	0.000375504	0.441942	0.273	0.518	1
clusters_0	Timm8b	0.000378411	0.950384	0.12	0.252	1
clusters_0	Ctsd	0.000382669	0.350351	0.398	0.742	1
clusters_0	Il10rb	0.000386134	0.643103	0.289	0.556	1
clusters_0	Ppp1cb	0.000396319	0.612128	0.221	0.427	1
clusters_0	9930111J21Rik2	0.000416253	0.644806	0.305	0.564	1
clusters_0	Socs3	0.000429489	0.79194	0.205	0.395	1
clusters_0	Psmd14	0.000431911	0.71886	0.129	0.271	1
clusters_0	Zfp36	0.000434301	0.375378	0.382	0.671	1
clusters_0	Usp18	0.000446196	0.149663	0.466	0.805	1
clusters_0	Atp6v1b2	0.000464838	0.83147	0.157	0.312	1
clusters_0	Zfp292	0.000475245	0.551345	0.237	0.438	1
clusters_0	Atpif1	0.000476884	0.82748	0.141	0.288	1
clusters_0	Mycbp2	0.000480794	0.563062	0.217	0.405	1
clusters_0	Arid1b	0.000485314	0.530264	0.133	0.263	1
clusters_0	Tlr13	0.000495477	0.540862	0.137	0.277	1
clusters_0	Taldo1	0.000497493	0.164996	0.514	0.918	1
clusters_0	Lyst	0.000504181	0.760113	0.438	0.8	1
clusters_0	Efhd2	0.000504257	0.806403	0.337	0.625	1
clusters_0	Nf1	0.000509482	0.844979	0.129	0.266	1
clusters_0	Ybx1	0.000524324	0.95558	0.241	0.471	1
clusters_0	Ptpn12	0.000537951	0.926561	0.253	0.482	1
clusters_0	Zfp106	0.00055983	0.517095	0.141	0.279	1
clusters_0	Ankrd12	0.000570825	1.19655	0.233	0.441	1
clusters_0	Dennd4a	0.00058045	0.361535	0.442	0.764	1
clusters_0	Rps14	0.000581052	0.912514	0.659	0.91	1
clusters_0	Epsti1	0.000582088	0.368964	0.422	0.732	1
clusters_0	Tmsb4x	0.00058836	-0.178013	0.932	0.997	1
clusters_0	Tmem234	0.000609216	0.733567	0.173	0.332	1
clusters_0	Sh3kbp1	0.000611416	0.681884	0.165	0.323	1
clusters_0	Btaf1	0.000611927	0.559347	0.133	0.263	1
clusters_0	Tgif1	0.000614392	0.239395	0.189	0.345	1
clusters_0	Psmb10	0.00062019	0.889196	0.217	0.408	1
clusters_0	Vps13d	0.000630688	0.506902	0.124	0.255	1
clusters_0	Rpl6	0.000637094	1.26448	0.582	0.792	1
clusters_0	Mrpl30	0.000650697	1.12143	0.153	0.301	1
clusters_0	Eif3c	0.000652739	1.02901	0.169	0.332	1
clusters_0	B2m	0.000677456	0.508309	0.827	1	1
clusters_0	Mapk1	0.000677465	0.546553	0.137	0.274	1
clusters_0	Vps35	0.000681595	0.918243	0.137	0.277	1
clusters_0	Atp5d	0.000687735	1.14111	0.193	0.392	1
clusters_0	Dctn4	0.000700621	0.688714	0.153	0.299	1
clusters_0	Rpl18	0.000712982	1.14806	0.598	0.819	1
clusters_0	A330023F24Rik	0.00072802	0.532785	0.189	0.353	1
clusters_0	Sema4d	0.00072844	0.64448	0.185	0.342	1
clusters_0	Edf1	0.000735422	1.0971	0.173	0.34	1
clusters_0	Clk1	0.000742923	0.778654	0.281	0.523	1
clusters_0	Cd300ld	0.000749741	0.884643	0.177	0.34	1
clusters_0	Tubb4b	0.000754997	0.969928	0.124	0.258	1
clusters_0	Ndfip2	0.000774162	0.710531	0.129	0.255	1
clusters_0	Psen1	0.000782269	1.09543	0.153	0.29	1
clusters_0	D16Ertd472e	0.000783118	0.367337	0.161	0.31	1
clusters_0	Tra2a	0.000788806	0.802927	0.373	0.685	1
clusters_0	Cox5a	0.000793897	0.938749	0.233	0.452	1
clusters_0	Msn	0.000800178	0.18097	0.538	0.926	1
clusters_0	Lilr4b	0.000813315	0.257469	0.506	0.907	1
clusters_0	Itgb1	0.000836661	0.765993	0.157	0.315	1
clusters_0	Smarca5	0.000838003	1.11941	0.145	0.293	1
clusters_0	Ap1g1	0.000862471	0.865634	0.177	0.334	1
clusters_0	H3f3a	0.000879201	-0.119207	0.811	0.992	1
clusters_0	Rsad2	0.000881922	0.215526	0.643	0.899	1
clusters_0	Mbnl2	0.000902235	0.592362	0.418	0.751	1
clusters_0	Mrpl20	0.000908168	1.01422	0.129	0.26	1
clusters_0	Rpl30	0.000917409	0.907944	0.639	0.91	1
clusters_0	Plekho2	0.000922138	0.740369	0.137	0.274	1
clusters_0	Crem	0.000924717	0.339885	0.141	0.274	1
clusters_0	Rara	0.000935343	0.662455	0.145	0.279	1
clusters_0	Tgm2	0.000949319	0.668677	0.317	0.553	1
clusters_0	Nop53	0.000950636	0.770745	0.129	0.252	1
clusters_0	Id2	0.000984559	0.706786	0.277	0.515	1
clusters_0	Sap30	0.0010063	0.47809	0.129	0.255	1
clusters_0	Trim30a	0.00100718	0.274354	0.538	0.934	1
clusters_0	Hnrnpdl	0.00103613	0.846278	0.133	0.263	1
clusters_0	Cd274	0.00104978	0.455285	0.446	0.759	1
clusters_0	Rpl27	0.00110102	0.975689	0.61	0.863	1
clusters_0	Dynll1	0.00111108	0.75015	0.261	0.496	1
clusters_0	Hnrnph2	0.00116746	0.916892	0.185	0.342	1
clusters_0	Sh2d3c	0.00120406	0.86164	0.185	0.342	1
clusters_0	Mif	0.0012589	1.88335	0.43	0.447	1
clusters_0	Ell2	0.00126122	0.748153	0.329	0.586	1
clusters_0	Thoc2	0.00126134	0.772091	0.177	0.323	1
clusters_0	Ddx60	0.00130793	0.746106	0.369	0.622	1
clusters_0	Kmt2c	0.0013633	0.778967	0.149	0.285	1
clusters_0	Ldha	0.00136646	0.234961	0.466	0.827	1
clusters_0	Snx20	0.00139224	0.795323	0.414	0.767	1
clusters_0	Ubc	0.00139868	0.376635	0.498	0.896	1
clusters_0	Map4k4	0.00141884	0.795861	0.197	0.375	1
clusters_0	Asph	0.00143901	0.974644	0.137	0.268	1
clusters_0	Nufip2	0.00152468	0.607777	0.165	0.31	1
clusters_0	Samhd1	0.00154056	0.177786	0.586	0.94	1
clusters_0	H2-K1	0.00154864	0.740057	0.679	0.923	1
clusters_0	Ssh2	0.00159056	0.734442	0.233	0.419	1
clusters_0	Stat1	0.00164437	0.403316	0.41	0.726	1
clusters_0	Ube2k	0.00167116	0.712277	0.129	0.255	1
clusters_0	Rassf1	0.00173623	0.510785	0.133	0.252	1
clusters_0	Hnrnpa3	0.00177709	0.882693	0.225	0.427	1
clusters_0	Rpl28	0.0017842	1.1178	0.594	0.833	1
clusters_0	Akr1a1	0.00203407	0.988902	0.181	0.34	1
clusters_0	Ptpn2	0.00203906	0.790742	0.153	0.279	1
clusters_0	Ankrd17	0.00204485	0.709543	0.233	0.422	1
clusters_0	Rps3a1	0.00204668	0.949399	0.631	0.868	1
clusters_0	Ttc39b	0.00210537	0.72268	0.153	0.285	1
clusters_0	Ddx17	0.00213327	0.687344	0.137	0.26	1
clusters_0	Zbp1	0.00215397	0.508882	0.414	0.712	1
clusters_0	Rab8b	0.00217269	0.366586	0.478	0.868	1
clusters_0	Gbp3	0.00222969	0.289893	0.137	0.258	1
clusters_0	Parp14	0.00225637	0.431665	0.454	0.764	1
clusters_0	Rapgef2	0.00226392	0.899829	0.137	0.258	1
clusters_0	Csrnp1	0.00231824	0.783957	0.313	0.556	1
clusters_0	Hnrnpa2b1	0.0023213	0.944614	0.305	0.589	1
clusters_0	Jund	0.00235616	0.123007	0.534	0.888	1
clusters_0	Pik3ap1	0.00241826	0.513898	0.474	0.841	1
clusters_0	Ube2i	0.00244935	0.793094	0.229	0.416	1
clusters_0	Cyth1	0.0024945	0.929247	0.333	0.605	1
clusters_0	Ggnbp2	0.00260494	0.903749	0.177	0.318	1
clusters_0	Zfas1	0.00261121	1.04373	0.161	0.304	1
clusters_0	Zfp36l2	0.00262885	0.99631	0.225	0.414	1
clusters_0	Kdm6b	0.0026328	0.914231	0.269	0.479	1
clusters_0	Mllt10	0.00264969	0.588157	0.137	0.252	1
clusters_0	Atp5g3	0.00269167	0.924917	0.133	0.252	1
clusters_0	Btg2	0.00272407	0.607486	0.502	0.885	1
clusters_0	Cul3	0.00274423	0.884208	0.213	0.384	1
clusters_0	Btbd9	0.00282701	1.03353	0.313	0.562	1
clusters_0	Taf10	0.00291252	0.848633	0.145	0.271	1
clusters_0	Lasp1	0.00295973	0.659223	0.233	0.405	1
clusters_0	Tnrc6b	0.0030544	1.04987	0.317	0.575	1
clusters_0	Micu1	0.00307657	0.917867	0.157	0.288	1
clusters_0	Hsp90ab1	0.00310701	1.58085	0.49	0.603	1
clusters_0	Dynlrb1	0.00310805	0.592515	0.137	0.255	1
clusters_0	Chst11	0.00311631	0.922388	0.197	0.359	1
clusters_0	Rps26	0.00311851	1.45353	0.55	0.784	1
clusters_0	Trim12c	0.00321003	1.14361	0.205	0.378	1
clusters_0	Rpl4	0.00329126	0.972948	0.265	0.507	1
clusters_0	Pias1	0.00335226	0.860415	0.169	0.304	1
clusters_0	Egln3	0.00340041	0.539286	0.165	0.299	1
clusters_0	Rps7	0.00345881	0.962818	0.618	0.868	1
clusters_0	Fnip1	0.00346859	0.879523	0.289	0.515	1
clusters_0	Ywhaq	0.00362572	0.934122	0.141	0.258	1
clusters_0	Snu13	0.0036524	0.601175	0.141	0.255	1
clusters_0	Rps13	0.00370793	0.766057	0.647	0.888	1
clusters_0	Ugcg	0.00371911	0.703494	0.149	0.274	1
clusters_0	Npm1	0.00372158	2.06777	0.434	0.501	1
clusters_0	Txnip	0.00379983	0.780549	0.225	0.386	1
clusters_0	Jpt1	0.00382754	0.88758	0.137	0.258	1
clusters_0	Usp34	0.00383704	0.975744	0.177	0.321	1
clusters_0	Rpl37	0.00386439	0.881586	0.643	0.907	1
clusters_0	Cyp4f18	0.00390665	1.30836	0.237	0.419	1
clusters_0	Ash1l	0.00392808	1.11289	0.153	0.277	1
clusters_0	Erbin	0.003956	0.998236	0.277	0.482	1
clusters_0	Ptpn18	0.00396715	0.916759	0.213	0.384	1
clusters_0	Hnrnpm	0.00416683	1.03022	0.197	0.351	1
clusters_0	Gapdh	0.0042048	0.216356	0.723	0.978	1
clusters_0	Dusp5	0.00425546	0.546301	0.257	0.438	1
clusters_0	Mndal	0.00426029	0.933085	0.145	0.266	1
clusters_0	Fos	0.00426077	0.529409	0.466	0.762	1
clusters_0	Senp2	0.00428772	0.55348	0.145	0.26	1
clusters_0	Eif4h	0.00430231	1.26058	0.161	0.29	1
clusters_0	Rpl12	0.00454841	1.88414	0.478	0.614	1
clusters_0	Nfat5	0.00462343	0.715589	0.169	0.304	1
clusters_0	Pgam1	0.00480234	0.666715	0.402	0.718	1
clusters_0	Cox17	0.00497865	0.505343	0.39	0.688	1
clusters_0	Cd82	0.0050607	0.622632	0.145	0.26	1
clusters_0	Ankrd11	0.00514121	0.784115	0.305	0.551	1
clusters_0	Purb	0.00532564	0.612078	0.141	0.252	1
clusters_0	Rbm47	0.00545854	0.775769	0.181	0.318	1
clusters_0	Zc3h12a	0.00558407	0.989412	0.177	0.312	1
clusters_0	Cox4i1	0.00563996	0.45801	0.438	0.827	1
clusters_0	Vmp1	0.00570042	0.812271	0.289	0.507	1
clusters_0	Plekhm2	0.00579137	1.18478	0.141	0.258	1
clusters_0	Etv6	0.00598139	1.23321	0.285	0.501	1
clusters_0	Rpl36al	0.00609067	1.15047	0.209	0.386	1
clusters_0	Tbc1d15	0.00611035	0.758701	0.213	0.364	1
clusters_0	Cnot4	0.00619276	0.701733	0.153	0.274	1
clusters_0	Rps11	0.00623139	0.914371	0.614	0.847	1
clusters_0	Gab2	0.00640594	0.790156	0.438	0.751	1
clusters_0	Tmsb10	0.00652972	0.794296	0.361	0.671	1
clusters_0	Srsf2	0.00662511	0.923597	0.145	0.258	1
clusters_0	Fndc3b	0.00679794	0.975485	0.317	0.548	1
clusters_0	Traf3	0.00685024	1.06394	0.173	0.301	1
clusters_0	Atf4	0.00687763	0.909354	0.237	0.416	1
clusters_0	Fmnl2	0.00707418	0.930343	0.333	0.542	1
clusters_0	Ppia	0.00724634	1.33117	0.554	0.792	1
clusters_0	Slc15a3	0.0075835	0.477254	0.45	0.792	1
clusters_0	Pan3	0.00764742	0.83242	0.149	0.26	1
clusters_0	Gcnt2	0.00770945	0.943729	0.293	0.496	1
clusters_0	Ankrd33b	0.0078803	0.988903	0.341	0.581	1
clusters_0	Fem1c	0.00796815	0.974429	0.253	0.416	1
clusters_0	Hectd1	0.00821633	0.984199	0.333	0.597	1
clusters_0	Atp5md	0.00833904	1.12115	0.253	0.441	1
clusters_0	Pgs1	0.00837648	1.10823	0.149	0.266	1
clusters_0	Ctsz	0.0083879	0.776453	0.305	0.534	1
clusters_0	Fxr1	0.00859221	0.525853	0.149	0.258	1
clusters_0	Rpl31	0.00869448	0.971401	0.293	0.537	1
clusters_0	Ppig	0.0090922	0.545216	0.149	0.26	1
clusters_0	Rpl26	0.00912664	1.02197	0.586	0.816	1
clusters_0	Rps17	0.00954535	1.31144	0.261	0.477	1
clusters_0	Ier3	0.00973202	0.650122	0.514	0.882	1
clusters_0	Ctss	0.0100924	0.648431	0.386	0.647	1
clusters_0	Rps6	0.0103236	1.50905	0.502	0.701	1
clusters_0	Xaf1	0.0104791	0.666539	0.337	0.559	1
clusters_0	Ogt	0.0105529	0.775129	0.149	0.255	1
clusters_0	Aldoa	0.0107088	0.358142	0.482	0.868	1
clusters_0	Map1lc3b	0.0110582	0.430956	0.486	0.855	1
clusters_0	Pcgf5	0.0111613	0.749933	0.285	0.471	1
clusters_0	Phf21a	0.0114528	0.922475	0.277	0.455	1
clusters_0	Gbp5	0.0117014	0.498332	0.245	0.392	1
clusters_0	Vps26a	0.0117946	1.39827	0.165	0.282	1
clusters_0	Pabpn1	0.0121987	0.926009	0.145	0.252	1
clusters_0	Tnfaip2	0.0123086	1.01554	0.285	0.488	1
clusters_0	Tnfaip3	0.0124837	0.572618	0.269	0.438	1
clusters_0	Drap1	0.0126047	1.12398	0.153	0.258	1
clusters_0	Prkce	0.0127198	0.852752	0.209	0.342	1
clusters_0	Fam162a	0.013211	0.852551	0.197	0.326	1
clusters_0	Slco3a1	0.0132412	0.927945	0.161	0.263	1
clusters_0	Ago2	0.0133371	1.12723	0.221	0.375	1
clusters_0	Clic4	0.0133929	0.971228	0.261	0.433	1
clusters_0	Cited2	0.0138367	0.871542	0.153	0.26	1
clusters_0	Marcksl1	0.0146976	1.13888	0.285	0.493	1
clusters_0	Trps1	0.0159583	0.868092	0.225	0.364	1
clusters_0	Btf3	0.0160908	0.821673	0.378	0.71	1
clusters_0	Rbm8a	0.016285	1.05545	0.153	0.255	1
clusters_0	Fcgr1	0.016356	0.99551	0.153	0.263	1
clusters_0	Pde7b	0.016533	1.17785	0.201	0.34	1
clusters_0	Rplp2	0.0165405	1.01144	0.57	0.83	1
clusters_0	Snrnp70	0.0167953	1.13157	0.161	0.266	1
clusters_0	Alcam	0.0168225	0.772526	0.313	0.496	1
clusters_0	Sdcbp	0.0172671	0.323733	0.526	0.907	1
clusters_0	Irak2	0.0178569	0.826414	0.414	0.71	1
clusters_0	Rbm39	0.0182266	0.489398	0.458	0.825	1
clusters_0	Gls	0.0183275	1.13215	0.189	0.315	1
clusters_0	Rpl8	0.0186879	1.37555	0.534	0.784	1
clusters_0	Rack1	0.0198057	1.57652	0.474	0.638	1
clusters_0	Jdp2	0.0203239	1.11148	0.241	0.395	1
clusters_0	Neat1	0.0206172	0.783283	0.502	0.838	1
clusters_0	Psma5	0.0210209	0.958524	0.189	0.31	1
clusters_0	Hnrnpu	0.0211379	1.11469	0.245	0.411	1
clusters_0	Gng5	0.0216658	0.292206	0.578	0.929	1
clusters_0	Mbnl1	0.0227867	0.817068	0.189	0.31	1
clusters_0	Clec2d	0.0230312	1.13523	0.257	0.405	1
clusters_0	Sqstm1	0.0233775	0.914227	0.341	0.567	1
clusters_0	Dhx40	0.0248371	1.49913	0.197	0.315	1
clusters_0	Naca	0.0249135	1.03343	0.329	0.597	1
clusters_0	Kansl1l	0.0252473	0.918211	0.185	0.301	1
clusters_0	Atg7	0.0256587	1.22388	0.169	0.274	1
clusters_0	Chka	0.0258052	0.692961	0.201	0.31	1
clusters_0	Rpl11	0.0260141	1.22564	0.562	0.83	1
clusters_0	Atp5b	0.0261002	1.19379	0.249	0.433	1
clusters_0	Il1rn	0.0265789	0.53766	0.454	0.748	1
clusters_0	Eif4a1	0.0271445	1.13948	0.293	0.521	1
clusters_0	Tomm20	0.028095	1.28658	0.185	0.307	1
clusters_0	Klhl24	0.0280985	0.958417	0.157	0.258	1
clusters_0	Plgrkt	0.0286254	1.21158	0.189	0.301	1
clusters_0	Inpp5d	0.0289703	0.921074	0.297	0.496	1
clusters_0	Lncpint	0.0291683	1.03677	0.197	0.318	1
clusters_0	Rbbp8	0.0295511	0.877388	0.153	0.252	1
clusters_0	Ubap2l	0.0297737	1.05197	0.165	0.263	1
clusters_0	Txnrd1	0.0300386	1.36416	0.197	0.323	1
clusters_0	Mirt1	0.0304516	1.32319	0.241	0.392	1
clusters_0	Ier5	0.0306167	0.43215	0.458	0.767	1
clusters_0	Gzmb	0.0307182	1.82797	0.209	0.351	1
clusters_0	Aff1	0.0321111	0.790548	0.241	0.373	1
clusters_0	Wnk1	0.0322269	0.954526	0.297	0.493	1
clusters_0	2025-03-03	0.0325853	1.27025	0.157	0.255	1
clusters_0	Wdr33	0.0326378	1.02216	0.157	0.255	1
clusters_0	Zfr	0.0327231	1.20967	0.161	0.255	1
clusters_0	Dock10	0.0339505	0.993768	0.345	0.551	1
clusters_0	Calr	0.0350821	1.2354	0.213	0.356	1
clusters_0	Eif2s2	0.0362296	1.24527	0.237	0.386	1
clusters_0	Bri3	0.037468	0.902268	0.398	0.682	1
clusters_0	Isg20	0.0382394	0.647755	0.514	0.805	1
clusters_0	Neurl3	0.0387917	0.936645	0.213	0.345	1
clusters_0	Hsp90b1	0.0398064	1.34226	0.189	0.304	1
clusters_0	Rpl34	0.0401659	0.830535	0.622	0.915	1
clusters_0	Nfkbid	0.0405743	1.09655	0.181	0.285	1
clusters_0	Btg1	0.0416206	1.02145	0.614	0.899	1
clusters_0	Foxp1	0.0419104	0.868515	0.201	0.307	1
clusters_0	mt-Nd4	0.0427713	1.29461	0.365	0.652	1
clusters_0	Ncoa2	0.0456969	1.00828	0.161	0.252	1
clusters_0	Slfn5	0.0457497	0.564898	0.43	0.663	1
clusters_0	Braf	0.0459084	1.47713	0.249	0.395	1
clusters_0	Stat4	0.049161	0.953401	0.177	0.277	1
clusters_0	Ndufa7	0.0501605	1.12798	0.293	0.485	1
clusters_0	Rtp4	0.0507862	0.514558	0.506	0.858	1
clusters_0	Rpl3	0.0521017	1.83174	0.406	0.493	1
clusters_0	Syk	0.0533879	0.857779	0.382	0.625	1
clusters_0	Zeb2	0.0538608	1.01883	0.458	0.745	1
clusters_0	Pum2	0.0558655	1.15011	0.177	0.268	1
clusters_0	Nfkbia	0.0565298	0.631818	0.554	0.874	1
clusters_0	H2afj	0.0576063	1.12079	0.329	0.559	1
clusters_0	Znrf1	0.0577914	0.997519	0.197	0.296	1
clusters_0	Gns	0.0638693	0.971724	0.193	0.29	1
clusters_0	Higd1a	0.0642613	1.06191	0.233	0.362	1
clusters_0	Smox	0.0643447	0.672063	0.506	0.822	1
clusters_0	Calm2	0.0644105	1.20628	0.345	0.584	1
clusters_0	S100a10	0.0645057	2.25106	0.265	0.258	1
clusters_0	Dusp1	0.065793	0.39074	0.554	0.825	1
clusters_0	Ambra1	0.067089	1.10208	0.189	0.288	1
clusters_0	Rbm3	0.0671533	0.740734	0.406	0.74	1
clusters_0	Dyrk1a	0.0684421	1.31819	0.201	0.304	1
clusters_0	Oasl2	0.0686152	0.580834	0.486	0.805	1
clusters_0	Junb	0.0734807	0.586143	0.59	0.937	1
clusters_0	mt-Co2	0.0746406	0.990039	0.727	0.942	1
clusters_0	Rsrc2	0.0756182	1.26735	0.301	0.477	1
clusters_0	Atp6v0c	0.0768691	0.442974	0.554	0.915	1
clusters_0	Saa3	0.0799825	0.944141	0.313	0.433	1
clusters_0	Hspa8	0.0806037	0.466268	0.45	0.751	1
clusters_0	Bnip3	0.0840187	0.981442	0.217	0.329	1
clusters_0	Irf7	0.0863191	0.623294	0.466	0.718	1
clusters_0	Ran	0.088392	2.13156	0.277	0.271	1
clusters_0	Nsmce2	0.0891239	1.22235	0.173	0.252	1
clusters_0	Cks2	0.0933894	0.786877	0.185	0.266	1
clusters_0	Nme2	0.0943587	2.00661	0.305	0.326	1
clusters_0	Csf3r	0.0948803	0.761122	0.462	0.781	1
clusters_0	Rgs2	0.0950213	0.974675	0.185	0.274	1
clusters_0	Tpt1	0.0966672	0.346163	0.876	0.995	1
clusters_0	Atf7ip	0.0991313	1.05418	0.181	0.271	1
clusters_0	Ifi211	0.0994632	0.702965	0.273	0.397	1
clusters_0	Zcchc2	0.0998127	1.38	0.201	0.301	1
clusters_0	Pnrc1	0.103418	0.438972	0.526	0.874	1
clusters_0	Rpl9	0.10551	0.789771	0.614	0.904	1
clusters_0	Fosb	0.11274	1.36307	0.201	0.299	1
clusters_0	Ftl1	0.119585	0.444819	0.884	0.986	1
clusters_0	Rpl36a	0.12687	1.33601	0.253	0.4	1
clusters_0	Lars2	0.133192	1.12618	0.233	0.334	1
clusters_0	mt-Nd5	0.133932	1.27252	0.217	0.329	1
clusters_0	Rpl24	0.134489	1.04844	0.542	0.811	1
clusters_0	Tyrobp	0.134502	0.121582	0.779	0.989	1
clusters_0	Isy1	0.136469	1.61081	0.193	0.277	1
clusters_0	Fnip2	0.141906	2.21197	0.265	0.263	1
clusters_0	Ifi27l2a	0.147202	1.15507	0.426	0.474	1
clusters_0	Uvrag	0.158486	0.970451	0.237	0.342	1
clusters_0	H2afz	0.158657	1.36993	0.466	0.625	1
clusters_0	Rps12	0.158778	0.533466	0.711	0.959	1
clusters_0	Clec4d	0.160612	0.597495	0.57	0.91	1
clusters_0	Ifit3b	0.163518	0.908771	0.337	0.496	1
clusters_0	Ewsr1	0.172415	1.40727	0.181	0.258	1
clusters_0	Spp1	0.172888	1.23168	0.458	0.586	1
clusters_0	Tnrc18	0.173522	1.54114	0.205	0.296	1
clusters_0	Camk1d	0.174812	1.48524	0.442	0.564	1
clusters_0	Hnrnpf	0.179365	1.05107	0.329	0.523	1
clusters_0	Ptk2b	0.187877	1.72842	0.281	0.416	1
clusters_0	Smchd1	0.191131	1.35254	0.369	0.556	1
clusters_0	Hmgb1	0.194981	1.31292	0.329	0.526	1
clusters_0	Kpna4	0.197446	0.98533	0.458	0.723	1
clusters_0	Hint1	0.199227	1.5376	0.193	0.282	1
clusters_0	Rpl36	0.199271	0.968065	0.422	0.745	1
clusters_0	Nup98	0.203866	1.41145	0.269	0.392	1
clusters_0	Atp5g2	0.204409	1.2492	0.201	0.296	1
clusters_0	Rps15a	0.20679	0.907868	0.554	0.858	1
clusters_0	Mpeg1	0.208383	0.954461	0.189	0.263	1
clusters_0	Rps27	0.211905	0.847614	0.554	0.877	1
clusters_0	Ifi207	0.213793	1.34757	0.369	0.411	1
clusters_0	Lrmda	0.215025	1.84896	0.301	0.441	1
clusters_0	Rps5	0.216521	1.00593	0.538	0.797	1
clusters_0	Cdkn1a	0.221312	1.34588	0.317	0.326	1
clusters_0	Gzma	0.221721	1.08225	0.181	0.252	1
clusters_0	Rpl7a	0.228821	1.07558	0.378	0.638	1
clusters_0	Rps19	0.237195	1.20552	0.486	0.734	1
clusters_0	Ccrl2	0.24036	0.935696	0.422	0.647	1
clusters_0	AW112010	0.249429	0.489511	0.309	0.427	1
clusters_0	Bst2	0.275184	1.36937	0.422	0.526	1
clusters_0	mt-Co1	0.281453	0.826026	0.823	0.992	1
clusters_0	Il1b	0.286097	0.522071	0.683	0.868	1
clusters_0	Rps29	0.286132	0.693923	0.594	0.904	1
clusters_0	Rpl39	0.293921	0.872018	0.546	0.844	1
clusters_0	Ifit3	0.301517	0.483364	0.494	0.644	1
clusters_0	Runx1	0.30196	1.15257	0.382	0.57	1
clusters_0	2310001H17Rik	0.306783	1.48632	0.217	0.301	1
clusters_0	Fxyd5	0.32143	0.295903	0.618	0.981	1
clusters_0	Ifi204	0.322655	0.352463	0.542	0.775	1
clusters_0	Basp1	0.323442	1.03802	0.498	0.633	1
clusters_0	Pkm	0.323799	0.531231	0.562	0.893	1
clusters_0	Elf2	0.331764	1.52579	0.189	0.252	1
clusters_0	Nupr1	0.335049	1.96995	0.189	0.268	1
clusters_0	Rpl37a	0.338342	0.486508	0.53	0.899	1
clusters_0	Rpsa	0.343557	0.730649	0.582	0.847	1
clusters_0	Ifi209	0.360962	1.06914	0.305	0.414	1
clusters_0	Rpl7	0.368218	0.677566	0.486	0.83	1
clusters_0	Gadd45b	0.378704	1.99561	0.341	0.392	1
clusters_0	Ccl6	0.386272	1.32373	0.285	0.392	1
clusters_0	Rpl23a	0.403657	0.856681	0.518	0.805	1
clusters_0	mt-Nd1	0.418514	1.72815	0.313	0.37	1
clusters_0	Snrpe	0.425827	1.64272	0.193	0.26	1
clusters_0	Ccl2	0.433223	0.916096	0.261	0.356	1
clusters_0	Gnaq	0.435476	2.01987	0.261	0.279	1
clusters_0	Rpl15	0.436871	1.31068	0.478	0.759	1
clusters_0	Cstb	0.449413	1.63344	0.402	0.616	1
clusters_0	Pcbp1	0.451337	1.51176	0.197	0.258	1
clusters_0	Tpd52	0.452956	0.670316	0.711	0.962	1
clusters_0	Serbp1	0.468183	1.71969	0.233	0.326	1
clusters_0	Rps15	0.473761	1.29681	0.45	0.674	1
clusters_0	Rpl10	0.473931	0.971452	0.45	0.762	1
clusters_0	Txn1	0.475673	0.367605	0.711	0.992	1
clusters_0	Abr	0.47889	1.40391	0.209	0.271	1
clusters_0	Ncl	0.491535	1.92569	0.333	0.425	1
clusters_0	Rpl10a	0.518641	1.29894	0.365	0.573	1
clusters_0	Anp32b	0.53535	1.94118	0.193	0.252	1
clusters_0	AY036118	0.537193	1.70628	0.269	0.364	1
clusters_0	Rps4x	0.537475	0.870877	0.514	0.803	1
clusters_0	mt-Cytb	0.539679	1.34656	0.438	0.729	1
clusters_0	Rpl5	0.576795	1.47702	0.39	0.556	1
clusters_0	Rpl38	0.578777	1.00803	0.494	0.786	1
clusters_0	Rpl35	0.588404	1.47676	0.305	0.449	1
clusters_0	Cmss1	0.59204	1.05853	0.482	0.753	1
clusters_0	Gas5	0.592055	1.52654	0.277	0.386	1
clusters_0	Ppp1r15a	0.593826	1.21721	0.241	0.304	1
clusters_0	Hnrnpa0	0.607198	1.43874	0.241	0.318	1
clusters_0	Prdx1	0.622514	2.02376	0.229	0.258	1
clusters_0	Litaf	0.62978	0.347732	0.622	0.962	1
clusters_0	Vps37b	0.630232	1.51048	0.285	0.395	1
clusters_0	Lgals1	0.640769	1.73869	0.309	0.403	1
clusters_0	Cnbp	0.641521	1.55874	0.217	0.279	1
clusters_0	Isg15	0.657607	0.46195	0.791	0.923	1
clusters_0	Xylt1	0.664146	1.34377	0.426	0.638	1
clusters_0	Ifrd1	0.67356	1.09627	0.45	0.644	1
clusters_0	Fgl2	0.683234	1.28973	0.281	0.351	1
clusters_0	Atp2b1	0.691802	1.6886	0.345	0.49	1
clusters_0	Rps28	0.696778	1.01856	0.458	0.795	1
clusters_0	Rps25	0.698899	0.780397	0.514	0.827	1
clusters_0	Mt1	0.710273	1.59704	0.341	0.43	1
clusters_0	Mxd1	0.735523	0.257746	0.739	0.989	1
clusters_0	Ninj1	0.74085	1.1394	0.237	0.29	1
clusters_0	Rpl29	0.763123	1.2053	0.438	0.688	1
clusters_0	Eef1b2	0.772626	1.33412	0.386	0.611	1
clusters_0	Atf3	0.773313	0.965062	0.329	0.416	1
clusters_0	mt-Nd2	0.792333	1.65648	0.261	0.315	1
clusters_0	Babam2	0.796292	1.32373	0.325	0.43	1
clusters_0	Ubb	0.803212	0.47428	0.655	0.951	1
clusters_0	Rpl13a	0.807726	0.866069	0.47	0.759	1
clusters_0	Rpl14	0.825581	1.31403	0.382	0.548	1
clusters_0	Gzmc	0.858953	2.44218	0.313	0.427	1
clusters_0	Il15	0.864584	1.92319	0.221	0.26	1
clusters_0	Rpl22	0.8647	1.33455	0.418	0.677	1
clusters_0	Malat1	0.87591	0.553519	0.888	1	1
clusters_0	Zmiz1	0.891591	1.61449	0.245	0.293	1
clusters_0	Polr2a	0.994101	1.77317	0.225	0.255	1
clusters_1	Sppl2a	5.13081e-21	1.00648	0.919	0.55	1.24766e-16
clusters_1	Ifit2	6.19266e-21	1.31177	0.762	0.394	1.50587e-16
clusters_1	Ogfr	1.06464e-20	0.861106	0.681	0.282	2.58889e-16
clusters_1	Gbp2	1.14797e-20	1.0494	0.886	0.524	2.79151e-16
clusters_1	Cd14	8.09471e-20	0.867739	0.995	0.727	1.96839e-15
clusters_1	Oasl1	2.78703e-19	0.843547	0.914	0.538	6.77722e-15
clusters_1	Ifit1	2.12066e-18	0.91564	0.941	0.648	5.15681e-14
clusters_1	Rsad2	2.31014e-18	0.67979	0.973	0.718	5.61757e-14
clusters_1	Trim30c	5.77248e-18	1.05467	0.589	0.219	1.40369e-13
clusters_1	Cmpk2	2.37099e-17	1.04521	0.762	0.413	5.76554e-13
clusters_1	Cd164	2.56466e-17	0.937041	0.697	0.343	6.23649e-13
clusters_1	Acod1	4.99178e-17	0.761631	0.984	0.737	1.21385e-12
clusters_1	Glis3	7.30406e-17	1.08295	0.389	0.098	1.77613e-12
clusters_1	Ifi204	1.32481e-16	0.72029	0.93	0.573	3.22154e-12
clusters_1	Pla2g7	4.08237e-16	0.824269	0.87	0.576	9.9271e-12
clusters_1	Gbp5	7.30733e-16	0.893691	0.584	0.224	1.77692e-11
clusters_1	Gm13822	1.33422e-15	0.687628	0.762	0.375	3.24443e-11
clusters_1	Ddx60	1.48422e-15	0.409435	0.778	0.408	3.60917e-11
clusters_1	Isg20	1.601e-15	0.375014	0.935	0.58	3.89316e-11
clusters_1	Herc6	2.02442e-15	0.718828	0.854	0.527	4.92279e-11
clusters_1	Fpr1	3.73339e-15	0.92995	0.838	0.501	9.07849e-11
clusters_1	Trim30a	3.80743e-15	0.502668	0.968	0.69	9.25853e-11
clusters_1	Pttg1	5.64743e-15	0.581868	0.708	0.352	1.37328e-10
clusters_1	Stat2	5.71036e-15	0.59722	0.741	0.392	1.38859e-10
clusters_1	Plac8	5.97258e-15	0.628373	0.962	0.711	1.45235e-10
clusters_1	Gpr141	7.03925e-15	0.842539	0.611	0.275	1.71173e-10
clusters_1	Gbp7	7.54669e-15	0.817975	0.686	0.319	1.83513e-10
clusters_1	Fndc3a	1.75197e-14	0.726113	0.827	0.492	4.26027e-10
clusters_1	Cd274	2.26157e-14	0.639386	0.859	0.534	5.49947e-10
clusters_1	Plin2	2.73749e-14	0.561524	0.935	0.627	6.65674e-10
clusters_1	Ddx58	3.18448e-14	0.540067	0.832	0.513	7.74371e-10
clusters_1	Trafd1	3.56207e-14	0.689579	0.784	0.448	8.66187e-10
clusters_1	Srgn	3.87598e-14	0.355845	1	0.935	9.42521e-10
clusters_1	Il1rn	6.29852e-14	0.559641	0.881	0.52	1.53161e-09
clusters_1	Arid5b	8.68403e-14	0.407411	0.768	0.422	2.11169e-09
clusters_1	Acer3	9.50571e-14	1.16655	0.589	0.275	2.3115e-09
clusters_1	Fcgr4	1.13298e-13	0.850535	0.757	0.459	2.75507e-09
clusters_1	Prnp	1.44541e-13	1.19278	0.508	0.228	3.51481e-09
clusters_1	Nos2	1.48506e-13	1.11926	0.643	0.352	3.61122e-09
clusters_1	Wfdc17	1.50439e-13	0.719447	0.984	0.755	3.65822e-09
clusters_1	Ifi47	1.66281e-13	0.628469	0.746	0.434	4.04345e-09
clusters_1	Sod2	1.80741e-13	0.376203	0.773	0.431	4.39507e-09
clusters_1	Fas	1.93986e-13	0.857104	0.492	0.2	4.71715e-09
clusters_1	Lipg	2.24675e-13	0.870481	0.73	0.427	5.46342e-09
clusters_1	Znfx1	2.48523e-13	0.641249	0.659	0.336	6.04333e-09
clusters_1	Nr3c1	2.64086e-13	0.668165	0.735	0.387	6.42178e-09
clusters_1	Gbp3	3.01423e-13	1.07878	0.395	0.128	7.3297e-09
clusters_1	Tap1	3.48191e-13	0.677208	0.654	0.343	8.46695e-09
clusters_1	Nmi	6.34475e-13	0.638386	0.643	0.336	1.54285e-08
clusters_1	Irak3	6.44922e-13	0.681814	0.735	0.413	1.56826e-08
clusters_1	Peli1	1.32977e-12	0.97225	0.73	0.448	3.23361e-08
clusters_1	Lgals8	1.79632e-12	0.77569	0.573	0.275	4.36812e-08
clusters_1	Tor1aip1	1.97754e-12	0.632776	0.838	0.52	4.80879e-08
clusters_1	Ifit3	2.03577e-12	0.567577	0.811	0.485	4.95037e-08
clusters_1	Tet2	2.89022e-12	0.394411	0.714	0.361	7.02815e-08
clusters_1	Lrrk2	3.05921e-12	0.762545	0.654	0.324	7.43909e-08
clusters_1	Ctss	4.27274e-12	0.427672	0.773	0.441	1.039e-07
clusters_1	Psmb8	4.56501e-12	0.485272	0.827	0.522	1.11007e-07
clusters_1	Isg15	5.01247e-12	0.424096	0.984	0.821	1.21888e-07
clusters_1	Ccl3	5.47205e-12	0.414111	0.719	0.408	1.33064e-07
clusters_1	Furin	5.59166e-12	0.603211	0.546	0.259	1.35972e-07
clusters_1	Whamm	5.63327e-12	0.923695	0.384	0.142	1.36984e-07
clusters_1	Gm21188	5.71913e-12	0.910691	0.524	0.238	1.39072e-07
clusters_1	Bcl2l1	9.33863e-12	0.499538	0.876	0.555	2.27087e-07
clusters_1	Klra2	9.60283e-12	0.57596	0.627	0.315	2.33512e-07
clusters_1	Parp14	1.01948e-11	0.411984	0.854	0.545	2.47907e-07
clusters_1	Fpr2	1.07443e-11	0.644345	0.811	0.501	2.61268e-07
clusters_1	Ube2l6	1.33112e-11	0.596407	0.454	0.172	3.23688e-07
clusters_1	Arl6ip1	1.69251e-11	0.764364	0.697	0.445	4.11568e-07
clusters_1	Il27	1.71345e-11	1.62534	0.292	0.086	4.16658e-07
clusters_1	Gm12185	1.83994e-11	1.0659	0.373	0.133	4.47417e-07
clusters_1	Upp1	2.14383e-11	0.608979	0.892	0.627	5.21316e-07
clusters_1	Fmnl2	2.21894e-11	0.262825	0.676	0.364	5.3958e-07
clusters_1	Cflar	2.22407e-11	0.816111	0.681	0.394	5.40828e-07
clusters_1	Cxcl2	2.59256e-11	0.557858	0.989	0.844	6.30433e-07
clusters_1	Tor3a	2.98987e-11	0.73257	0.53	0.266	7.27048e-07
clusters_1	Birc3	3.01465e-11	0.742705	0.681	0.382	7.33073e-07
clusters_1	Dusp16	3.2968e-11	0.500147	0.941	0.629	8.01682e-07
clusters_1	Tapbp	3.82879e-11	0.604473	0.741	0.445	9.31046e-07
clusters_1	Capza2	4.41146e-11	0.605151	0.859	0.608	1.07273e-06
clusters_1	Samsn1	4.56213e-11	0.703864	0.957	0.744	1.10937e-06
clusters_1	Hcar2	4.57654e-11	0.447395	0.714	0.394	1.11288e-06
clusters_1	Cd69	4.71822e-11	1.35773	0.546	0.301	1.14733e-06
clusters_1	Epsti1	5.25762e-11	0.471699	0.832	0.508	1.2785e-06
clusters_1	Ccl4	5.34855e-11	0.843919	0.719	0.445	1.30061e-06
clusters_1	Qsox1	6.67308e-11	0.75524	0.778	0.485	1.62269e-06
clusters_1	Tgif1	7.08347e-11	0.737325	0.47	0.2	1.72249e-06
clusters_1	Ogfrl1	8.06093e-11	0.40208	0.73	0.42	1.96018e-06
clusters_1	Aoah	8.97002e-11	0.342421	0.557	0.268	2.18124e-06
clusters_1	Slfn5	1.05891e-10	0.335555	0.816	0.462	2.57496e-06
clusters_1	Il15ra	1.07196e-10	0.581779	0.357	0.124	2.60668e-06
clusters_1	Ly6e	1.07547e-10	0.558902	0.903	0.611	2.61522e-06
clusters_1	Lnpep	1.20168e-10	0.788407	0.724	0.436	2.92213e-06
clusters_1	Xaf1	1.2023e-10	0.376563	0.686	0.375	2.92364e-06
clusters_1	Sp140	1.20593e-10	0.554302	0.876	0.58	2.93245e-06
clusters_1	Usp25	1.26666e-10	0.441811	0.865	0.564	3.08013e-06
clusters_1	Ccrl2	1.33826e-10	0.277287	0.789	0.455	3.25426e-06
clusters_1	Ifitm3	1.44738e-10	0.324106	0.995	0.918	3.51958e-06
clusters_1	Sgk3	1.65199e-10	0.810206	0.514	0.261	4.01714e-06
clusters_1	Pcmt1	1.69541e-10	0.740907	0.643	0.371	4.12272e-06
clusters_1	Nt5c3	1.72695e-10	0.346195	0.562	0.282	4.19941e-06
clusters_1	Rnf213	1.72774e-10	0.103721	0.897	0.62	4.20134e-06
clusters_1	Slfn8	1.98222e-10	0.401594	0.692	0.38	4.82016e-06
clusters_1	Vps54	2.07412e-10	0.703522	0.589	0.322	5.04364e-06
clusters_1	Eif2ak2	2.09925e-10	0.414762	0.708	0.424	5.10475e-06
clusters_1	Usb1	2.12736e-10	1.2119	0.308	0.103	5.17309e-06
clusters_1	Ifit3b	2.14649e-10	0.232955	0.665	0.331	5.21963e-06
clusters_1	Abca1	2.15308e-10	0.591194	0.492	0.226	5.23565e-06
clusters_1	Arg2	2.19776e-10	0.510428	0.876	0.59	5.3443e-06
clusters_1	Tlr2	2.23494e-10	1.02012	0.551	0.303	5.4347e-06
clusters_1	Irgm1	2.51294e-10	0.503997	0.616	0.324	6.11072e-06
clusters_1	Gch1	2.61444e-10	0.6039	0.741	0.48	6.35753e-06
clusters_1	Ifih1	2.82515e-10	0.459485	0.724	0.422	6.86993e-06
clusters_1	Nedd9	2.9165e-10	0.173875	0.903	0.622	7.09206e-06
clusters_1	Ntng2	3.41305e-10	0.770867	0.541	0.277	8.29951e-06
clusters_1	Tent5a	3.48915e-10	0.865186	0.438	0.191	8.48455e-06
clusters_1	Lpcat2	3.51473e-10	0.62505	0.692	0.431	8.54676e-06
clusters_1	Trim30d	3.81356e-10	0.417256	0.73	0.413	9.27344e-06
clusters_1	2025-03-05	4.69202e-10	1.00357	0.497	0.252	1.14096e-05
clusters_1	Tnfrsf1b	4.92029e-10	0.324507	0.67	0.385	1.19647e-05
clusters_1	Ifi209	5.01628e-10	0.281688	0.578	0.28	1.21981e-05
clusters_1	Ski	5.14643e-10	0.841343	0.519	0.261	1.25146e-05
clusters_1	Usp18	5.37522e-10	0.543194	0.843	0.592	1.30709e-05
clusters_1	Mvp	5.81154e-10	0.684563	0.492	0.249	1.41319e-05
clusters_1	Casp8	6.025e-10	0.4023	0.454	0.205	1.4651e-05
clusters_1	Dach1	6.16605e-10	0.551423	0.757	0.464	1.4994e-05
clusters_1	Ifi211	6.61245e-10	0.504338	0.546	0.261	1.60795e-05
clusters_1	Zup1	7.65085e-10	0.440276	0.627	0.34	1.86046e-05
clusters_1	Hist3h2a	7.91329e-10	1.62837	0.27	0.086	1.92428e-05
clusters_1	Morc3	7.98672e-10	0.452899	0.605	0.336	1.94213e-05
clusters_1	Tank	8.03418e-10	0.81915	0.649	0.366	1.95367e-05
clusters_1	Cd300lf	8.21567e-10	0.450207	0.973	0.699	1.99781e-05
clusters_1	Nod1	8.2438e-10	1.21666	0.319	0.117	2.00465e-05
clusters_1	1600014C10Rik	8.41391e-10	0.46414	0.535	0.284	2.04601e-05
clusters_1	Psmb9	9.08507e-10	0.321725	0.649	0.382	2.20922e-05
clusters_1	Lgals9	1.02685e-09	0.336943	0.816	0.515	2.49699e-05
clusters_1	Chmp4b	1.06451e-09	0.442031	0.903	0.636	2.58856e-05
clusters_1	Snx10	1.26891e-09	0.412129	0.584	0.336	3.0856e-05
clusters_1	Prdx5	1.30505e-09	0.280608	0.984	0.858	3.1735e-05
clusters_1	Cd33	1.34458e-09	0.586857	0.762	0.501	3.26961e-05
clusters_1	Helz2	1.67775e-09	0.553879	0.595	0.324	4.07979e-05
clusters_1	N4bp1	1.73265e-09	0.429456	0.865	0.583	4.21329e-05
clusters_1	Lcp2	1.82977e-09	0.458383	0.638	0.373	4.44944e-05
clusters_1	Daxx	1.8874e-09	0.618361	0.514	0.259	4.58959e-05
clusters_1	Hmox2	2.21871e-09	0.412446	0.568	0.322	5.39525e-05
clusters_1	Il1f9	2.25928e-09	0.65803	0.627	0.354	5.49388e-05
clusters_1	Pdcd10	2.45644e-09	0.465143	0.708	0.462	5.97333e-05
clusters_1	Tmed5	2.63734e-09	0.458078	0.778	0.483	6.41322e-05
clusters_1	H3f3b	2.70008e-09	0.396338	1	0.932	6.56579e-05
clusters_1	Tbrg1	2.76323e-09	0.733309	0.568	0.331	6.71935e-05
clusters_1	Filip1l	2.90864e-09	0.417218	0.503	0.261	7.07294e-05
clusters_1	Ehd1	2.95251e-09	0.472475	0.714	0.431	7.17961e-05
clusters_1	Sell	2.96204e-09	0.465817	0.757	0.473	7.20279e-05
clusters_1	A530064D06Rik	3.19478e-09	0.754304	0.481	0.242	7.76876e-05
[truncated: 2,066 more rows]
