# Supplementary material for: The Gut Commensal Bacteria Veillonella parvula-Induced Neutrophil Activation Mediates Antitumor Activity
Source: Research Square preprint supplement (doi:10.21203/rs.3.rs-7615171/v1), 2025-10-16
Supplement: Supplementary file 6 [file ee5b23f854409554afa911b0.xlsx]

## Sheet: Supp Table 5
Supplementary Table 5. Sequences of the primers used for cloning constructs.
Protein ID	Forward primer sequence (5’–3’)	Reverse primer sequence (5’–3’)
D1BQL8 (Vpar_0143)	5′-CTG GTG CCG CGC GGC AGC CAT ATG AAA AAC GTA CAA CAA GTA AAT CAA TAT TTA GCA GA-3′	5′-AGT GGT GGT GGT GGT GGT GCT TAT TTC AGC ATA GAT TCG ATG AAC CAG ATT TG-3′
D1BLI2 (Vpar_0556)	5′-CTG GTG CCG CGC GGC AGC CAT ATG AAA AAA CAA TTC GCA G-3′	5′-AGT GGT GGT GGT GGT GGT GCT TAG AAT TTG TAG TTA AGT TCT GC-3′
